# Supplementary material for: Structurally differentiated cis-elements that interact with PU.1 are functionally distinguishable in acute promyelocytic leukemia
Source: J Hematol Oncol. 2013 Apr 2;6:25. doi: 10.1186/1756-8722-6-25 (PMC3618267; doi:10.1186/1756-8722-6-25)
Supplement: Additional file 2: Table S1 — Significantly enriched PU.1 ChIP regions in NB4 cells. [file 1756-8722-6-25-S2.xls]

## Sheet: Table S3
Table S1. Significantly enriched PU.1 ChIP regions in NB4 cells
Chrom	Start	End	Long	Short	RAREh	length	summit	tags	'-10*log10(pvalue)	fold_enrichment	FDR(%)	Strand	Refseq	Region	RegionDescription	TSS	Distance2TSS	Symbol	Geneid	Type
chr1	831883	832307	0#	2#[AGGGGAAG:107:0.9496545689046608] [AGGGGAAG:175:0.9496545689046608]	1#[TGACCA:417:0.8180826906887997]	426	249	67	439.17	29.01	0.03	-	NR_027055	UE	Upstream Enhancer	802045	30087	FAM41C	284593	miscRNA
chr1	853970	854442	0#	1#[GGAGGAAG:230:0.9250330832242935]	0#	474	232	38	214.3	28.54	0.04	+	NM_152486	Body	Gene Body	850983	3219	SAMD11	148398	protein-coding
chr1	951564	952327	1#[GAAAAAGGAAGTG:476:0.9104787060707681]	2#[CTTCCTCT:735:1.0000000000000002] [CTTCCTGA:162:0.8653647538446115]	1#[AGGTCA:132:1.0]	765	495	112	668.91	45.14	0	+	NM_198576	Body	Gene Body	945365	6694	AGRN	375790	protein-coding
chr1	960999	961531	1#[AAGAGAGGAAGTG:211:0.8321929406940048]	3#[AGAGGAAC:235:0.9279064825938323] [TGGGGAAG:297:0.925367388796723] [CTTCCTGA:382:0.8653647538446115]	4#[TGACCT:5:1.0] [TGACCT:112:1.0] [TGACCT:121:1.0] [TGACCA:387:0.8180826906887997]	534	222	52	310.55	30.81	0.02	+	NM_198576	Body	Gene Body	945365	15856	AGRN	375790	protein-coding
chr1	963617	964388	0#	3#[CTTCCCCA:109:0.925367388796723] [AGGGGAAC:489:0.8775610514984932] [GGGGGAAG:556:0.8746876521289542]	1#[TGACCA:264:0.8180826906887997]	773	512	94	348.96	21.47	0.03	+	NM_198576	Body	Gene Body	945365	18764	AGRN	375790	protein-coding
chr1	1069391	1069689	0#	1#[GGAGGAAG:84:0.9250330832242935]	0#	300	95	30	242.63	27.62	0.03	+	NR_038869	DE	DownStream Enhancer	1062259	7227	LOC254099	254099	miscRNA
chr1	1091323	1091740	0#	2#[CTTCCTCC:269:0.9250330832242935] [ACAGGAAG:118:0.8896519339525494]	1#[GGGTCA:365:0.8857896050338628]	419	273	43	267.46	31.18	0.04	+	NR_029639	PP	Proximal Promoter	1092346	-750	MIR200B	406984	miscRNA
chr1	1134042	1134633	0#	2#[GGGGGAAG:508:0.8746876521289542] [TGGGGAAC:103:0.8532738713905553]	1#[GGGTCA:516:0.8857896050338628]	593	262	64	398.62	33.09	0.03	-	NM_148902	UE	Upstream Enhancer	1131952	2352	TNFRSF18	8784	protein-coding
chr1	1156557	1156985	0#	1#[CTTCCGCT:201:0.9370344629705614]	0#	430	236	41	233.93	26.55	0.03	-	NM_016547	PP	Proximal Promoter	1157310	-517	SDF4	51150	protein-coding
chr1	1185151	1185786	0#	2#[CTTCCTCT:235:1.0000000000000002] [AGAGGAAG:460:1.0]	0#	637	415	36	155.59	17.99	0.03	-	NM_194315	Body	Gene Body	1199097	-13531	UBE2J2	118424	protein-coding
chr1	1300250	1300908	0#	2#[TGAGGAAC:289:0.9036193024858946] [CTTCCGCC:87:0.8620675461948546]	2#[GGGTCA:526:0.8857896050338628] [CGGTCA:489:0.8490319803691448]	660	536	60	158.9	12.36	0.03	-	NM_001127230	PP	Proximal Promoter	1300425	361	AURKAIP1	54998	protein-coding
chr1	1396850	1397086	0#	1#[GGAGGAAG:142:0.9250330832242935]	0#	238	154	21	198.83	39.53	0.04	+	NM_031921	PP	Proximal Promoter	1397026	-22	ATAD3B	83858	protein-coding
chr1	1463820	1464409	0#	1#[TGAGGAAG:235:0.9757128198920622]	3#[AGGTCA:275:1.0] [TGACCC:22:0.8857896050338628] [TGACCC:498:0.8857896050338628]	591	347	36	133.36	14.95	0.05	-	NM_001114748	Body	Gene Body	1465603	-1436	TMEM240	339453	protein-coding
chr1	1508278	1508721	1#[AAATGAGGAACTG:228:0.855896383938947]	1#[CTTCCCCA:107:0.925367388796723]	2#[AGGTCA:297:1.0] [TGGTCA:371:0.8180826906887997]	445	217	38	223.92	26.43	0.03	-	NM_014188	UE	Upstream Enhancer	1500125	8370	SSU72	29101	protein-coding
chr1	1532125	1532700	0#	1#[AGGGGAAG:165:0.9496545689046608]	2#[TGACCC:456:0.8857896050338628] [TGGTCA:508:0.8180826906887997]	577	388	63	399.52	35.46	0.03	-	NM_001242659	UE	Upstream Enhancer	1525339	7174	C1orf233	643988	protein-coding
chr1	1580261	1580635	0#	2#[ACAGGAAG:214:0.8896519339525494] [ACAGGAAG:301:0.8896519339525494]	0#	376	138	23	189.24	25.6	0.04	-	NM_033489	Body	Gene Body	1645635	-65236	CDK11B	984	protein-coding
chr1	1645575	1645877	0#	2#[ACAGGAAG:158:0.8896519339525494] [ACAGGAAG:242:0.8896519339525494]	0#	304	82	30	266.29	24.74	0.04	-	NM_033489	PP	Proximal Promoter	1645635	22	CDK11B	984	protein-coding
chr1	1696735	1697545	1#[GAATGGGGAAGTG:443:0.8847814037863783]	1#[TGAGGAAA:63:0.8667187803472263]	2#[AGGTCA:694:1.0] [TGGTCA:715:0.8180826906887997]	812	354	86	461.96	36.19	0	-	NM_023018	Body	Gene Body	1699769	-2680	NADK	65220	protein-coding
chr1	1704018	1704559	1#[AAAACAGGAAATG:382:0.8021130036448111]	2#[CTTCCCCT:274:0.9496545689046608] [CTTCCTCC:175:0.9250330832242935]	0#	543	361	81	638.83	46.51	0	-	NM_001198994	UE	Upstream Enhancer	1701368	3011	NADK	65220	protein-coding
chr1	1790636	1791167	0#	2#[AGAGGAAC:211:0.9279064825938323] [GGAGGAAG:328:0.9250330832242935]	2#[TGACCT:125:1.0] [GGGTCA:185:0.8857896050338628]	533	314	53	244.53	24.79	0.03	-	NM_002074	Body	Gene Body	1812386	-21436	GNB1	2782	protein-coding
chr1	1811306	1811694	0#	3#[AGCGGAAG:133:0.9370344629705611] [TGGGGAAG:69:0.925367388796723] [TGGGGAAG:90:0.925367388796723]	0#	390	279	36	235.31	23.81	0.03	-	NM_002074	PP	Proximal Promoter	1812386	-801	GNB1	2782	protein-coding
chr1	1917560	1917811	0#	1#[CTTCCTGT:138:0.8896519339525494]	0#	253	175	19	131.91	16.18	0.05	-	NM_001080484	Body	Gene Body	1925136	-7401	KIAA1751	85452	protein-coding
chr1	1957603	1957973	0#	1#[CTTCCTCC:188:0.9250330832242935]	1#[GGGTCA:87:0.8857896050338628]	372	182	30	178.36	21.63	0.04	+	NM_002744	UE	Upstream Enhancer	1971768	-13983	PRKCZ	5590	protein-coding
chr1	2033364	2034201	0#	1#[TTTCCCCT:61:0.8406605293598248]	1#[GGGTCA:353:0.8857896050338628]	839	592	58	370.38	49.83	0.03	+	NM_002744	Body	Gene Body	1971768	62188	PRKCZ	5590	protein-coding
chr1	2069915	2070587	0#	3#[CTTCCTCC:236:0.9250330832242935] [GGGGGAAG:551:0.8746876521289542] [TTTCCTCA:265:0.8667187803472263]	2#[TGGTCA:58:0.8180826906887997] [TGACCA:213:0.8180826906887997]	674	218	50	140.74	13.84	0.04	+	NM_002744	Body	Gene Body	1971768	98365	PRKCZ	5590	protein-coding
chr1	2080438	2081002	1#[GACTTCCTCTTTG:221:0.8493477820837315]	1#[TGGGGAAG:430:0.925367388796723]	2#[TGACCA:63:0.8180826906887997] [TGGTCA:189:0.8180826906887997]	566	225	83	378.21	22.56	0.03	+	NM_002744	Body	Gene Body	1971768	108895	PRKCZ	5590	protein-coding
chr1	2125892	2126237	0#	1#[AGAGGAAC:86:0.9279064825938323]	1#[GGGTCA:273:0.8857896050338628]	347	244	25	167.57	21.42	0.03	-	NM_001146310	Body	Gene Body	2129032	-2896	C1orf86	199990	protein-coding
chr1	2155552	2156040	0#	1#[CGAGGAAG:245:0.8840323149896212]	2#[GGGTCA:126:0.8857896050338628] [TGGTCA:40:0.8180826906887997]	490	276	29	134.97	15.86	0.05	+	NM_003036	Body	Gene Body	2149993	5835	SKI	6497	protein-coding
chr1	2167959	2168311	0#	1#[AGAGGAAC:181:0.9279064825938323]	2#[TGACCT:50:1.0] [AGGTCA:346:1.0]	354	199	36	203.97	18.27	0.03	+	NM_003036	Body	Gene Body	2149993	18165	SKI	6497	protein-coding
chr1	2176998	2177759	0#	2#[TTTCCTCT:168:0.8910059604551641] [TTTCCTCT:638:0.8910059604551641]	13#[TGACCT:92:1.0] [TGACCT:126:1.0] [TGACCT:194:1.0] [TGACCT:220:1.0] [TGACCT:252:1.0] [TGACCT:286:1.0] [TGACCT:388:1.0] [TGACCT:423:1.0] [TGACCT:457:1.0] [TGACCT:491:1.0] [TGACCT:523:1.0] [TGACCT:548:1.0] [TGACCT:630:1.0]	763	220	54	169.81	9.69	0.03	+	NM_003036	Body	Gene Body	2149993	27225	SKI	6497	protein-coding
chr1	2211549	2212886	0#	3#[GGAGGAAG:425:0.9250330832242935] [TTTCCTCT:680:0.8910059604551641] [GTTCCGCA:653:0.8406537654564559]	2#[TGACCT:313:1.0] [GGGTCA:1184:0.8857896050338628]	1339	654	185	976.75	50.18	0	+	NM_003036	Body	Gene Body	2149993	62210	SKI	6497	protein-coding
chr1	2222315	2222794	0#	2#[CTTCCCCT:260:0.9496545689046608] [ACAGGAAG:95:0.8896519339525494]	2#[AGGTCA:430:1.0] [CGGTCA:225:0.8490319803691448]	481	257	35	184.76	24.09	0.04	+	NM_003036	Body	Gene Body	2149993	72579	SKI	6497	protein-coding
chr1	2312860	2313410	0#	2#[AGCGGAAG:275:0.9370344629705611] [CTTCCGCC:151:0.8620675461948546]	0#	552	284	70	441.3	34.88	0.03	+	NM_007033	PP	Proximal Promoter	2313073	71	RER1	11079	protein-coding
chr1	2470023	2470427	0#	3#[CTTCCGCA:264:0.9127472828626235] [CTTCCGCC:195:0.8620675461948546] [CGGGGAAG:32:0.8336868838942818]	0#	406	181	35	197.5	22.29	0.04	-	NR_026927	DE	DownStream Enhancer	2474144	-3940	LOC115110	115110	miscRNA
chr1	2485975	2487056	0#	3#[AGGGGAAG:617:0.9496545689046608] [AGAGGAAC:394:0.9279064825938323] [TGGGGAAG:193:0.925367388796723]	2#[TGACCC:124:0.8857896050338628] [GGGTCA:220:0.8857896050338628]	1083	634	54	165.24	9.84	0.03	+	NR_037844	PP	Proximal Promoter	2485967	642	LOC100133445	100133445	miscRNA
chr1	2505190	2505584	0#	2#[GGAGGAAG:84:0.9250330832242935] [AGGGGAAA:339:0.8406605293598248]	0#	396	119	37	184.97	19.19	0.04	+	NR_036638	UE	Upstream Enhancer	2507758	-2449	FAM213B	127281	protein-coding
chr1	2506722	2507078	0#	1#[CTTCCCCT:130:0.9496545689046608]	0#	358	127	34	159	14.36	0.03	+	NR_036638	PP	Proximal Promoter	2507758	-909	FAM213B	127281	protein-coding
chr1	2919082	2919437	1#[GAATGAGGAACTG:163:0.8396783955629076]	0#	0#	357	183	29	143.45	18.27	0.04	+	NM_080431	UE	Upstream Enhancer	2927905	-8640	ACTRT2	140625	protein-coding
chr1	3000344	3000697	0#	2#[AGGGGAAC:255:0.8775610514984932] [TCAGGAAG:90:0.8653647538446115]	2#[TGACCC:181:0.8857896050338628] [TGGTCA:72:0.8180826906887997]	355	110	29	254.24	37.15	0.03	+	NM_022114	Body	Gene Body	2975601	24853	PRDM16	63976	protein-coding
chr1	3002757	3003169	0#	4#[CTTCCTCT:223:1.0000000000000002] [AGGGGAAG:85:0.9496545689046608] [CTTCCCCT:203:0.9496545689046608] [CGAGGAAG:335:0.8840323149896212]	1#[AGGTCA:98:1.0]	414	215	25	154.52	28.88	0.03	+	NM_022114	Body	Gene Body	2975601	27371	PRDM16	63976	protein-coding
chr1	3128370	3129548	1#[GACTTCCTCTTTT:433:0.891331783801081]	2#[TGAGGAAG:450:0.9757128198920622] [AGGGGAAG:144:0.9496545689046608]	2#[TGACCT:203:1.0] [CGGTCA:1018:0.8490319803691448]	1180	437	219	1606.45	85.37	0	+	NM_022114	Body	Gene Body	2975601	153206	PRDM16	63976	protein-coding
chr1	3244783	3245086	1#[GACTTCCTCATTT:122:0.8325598287559037]	0#	0#	305	111	23	138.13	23.01	0.04	+	NM_022114	Body	Gene Body	2975601	269293	PRDM16	63976	protein-coding
chr1	3337766	3338090	0#	3#[CTTCCTCT:252:1.0000000000000002] [AGGGGAAG:7:0.9496545689046608] [CTTCCCCA:157:0.925367388796723]	0#	326	131	47	272.05	18.32	0.04	+	NM_022114	Body	Gene Body	2975601	362296	PRDM16	63976	protein-coding
chr1	3402094	3402904	0#	2#[CTTCCTCC:447:0.9250330832242935] [TTTCCCCT:191:0.8406605293598248]	4#[AGGTCA:116:1.0] [TGACCC:721:0.8857896050338628] [TGACCG:406:0.8490319803691448] [TGACCG:537:0.8490319803691448]	812	382	103	414.76	25.49	0.03	-	NM_001409	Body	Gene Body	3517919	-115443	MEGF6	1953	protein-coding
chr1	3464769	3465247	0#	1#[TTTCCCCT:182:0.8406605293598248]	1#[TGACCA:341:0.8180826906887997]	480	188	39	265.34	33.49	0.04	-	NM_001409	Body	Gene Body	3517919	-52962	MEGF6	1953	protein-coding
chr1	3499879	3500600	0#	5#[AGAGGAAG:258:1.0] [AGAGGAAG:594:1.0] [AGGGGAAG:221:0.9496545689046608] [ACAGGAAG:154:0.8896519339525494] [GGAGGAAC:437:0.8529395658181258]	0#	723	125	55	286.68	20.08	0.04	-	NM_001409	Body	Gene Body	3517919	-17915	MEGF6	1953	protein-coding
chr1	3503290	3504333	0#	5#[TGGGGAAG:652:0.925367388796723] [CTTCCTGT:254:0.8896519339525494] [CGAGGAAG:596:0.8840323149896212] [CTTCCTCG:671:0.8840323149896212] [GGAGGAAC:956:0.8529395658181258]	4#[TGACCT:352:1.0] [AGGTCA:407:1.0] [TGACCC:640:0.8857896050338628] [TGACCC:746:0.8857896050338628]	1045	786	57	231.92	15.86	0.03	-	NM_001409	Body	Gene Body	3517919	-13843	MEGF6	1953	protein-coding
chr1	3510739	3511524	0#	4#[CTTCCCCA:500:0.925367388796723] [CTTCCTCC:408:0.9250330832242935] [GGGGGAAG:330:0.8746876521289542] [TGGGGAAC:706:0.8532738713905553]	6#[AGGTCA:87:1.0] [AGGTCA:184:1.0] [GGGTCA:98:0.8857896050338628] [GGGTCA:172:0.8857896050338628] [TGACCC:234:0.8857896050338628] [GGGTCA:396:0.8857896050338628]	787	382	78	266.43	20.22	0.04	-	NM_001409	Body	Gene Body	3517919	-6798	MEGF6	1953	protein-coding
chr1	3518357	3518723	0#	3#[AGAGGAAC:105:0.9279064825938323] [CTTCCCCG:217:0.8336868838942818] [CTTCCCCG:305:0.8336868838942818]	0#	368	238	27	117.02	12.46	0.08	-	NM_001409	PP	Proximal Promoter	3517919	676	MEGF6	1953	protein-coding
chr1	3623765	3624649	0#	2#[AGGGGAAG:219:0.9496545689046608] [GGAGGAAG:340:0.9250330832242935]	1#[TGACCT:237:1.0]	886	225	51	168.2	18.97	0.03	+	NM_001204188	Body	Gene Body	3558988	65002	TP73	7161	protein-coding
chr1	3677061	3677493	0#	3#[CTTCCTCT:66:1.0000000000000002] [AGAGGAAG:185:1.0] [GGAGGAAG:168:0.9250330832242935]	1#[TGACCT:29:1.0]	434	199	32	196.85	26.49	0.04	+	NM_152492	Body	Gene Body	3658824	18436	CCDC27	148870	protein-coding
chr1	3727356	3727544	0#	1#[CTTCCCCT:130:0.9496545689046608]	0#	190	79	23	135.89	16.2	0.05	-	NM_014704	Body	Gene Body	3763657	-36222	CEP104	9731	protein-coding
chr1	3749449	3749844	1#[AAAAGAGGAATTG:308:0.8655615036943328]	1#[CTTCCTCT:73:1.0000000000000002]	1#[CGGTCA:159:0.8490319803691448]	397	81	37	352.18	47.88	0.03	-	NM_014704	Body	Gene Body	3763657	-14127	CEP104	9731	protein-coding
chr1	4684580	4685050	1#[GAAAGAGGAAATG:183:0.8610192750300419]	0#	0#	472	208	37	254.02	27.62	0.03	+	NM_018836	Body	Gene Body	4614964	69824	AJAP1	55966	protein-coding
chr1	6009405	6010018	0#	3#[CTTCCCCA:280:0.925367388796723] [AGTGGAAG:157:0.8808814310639483] [TTTCCCCT:389:0.8406605293598248]	0#	615	310	38	123.47	10.17	0.07	+	NM_001199861	Body	Gene Body	5974944	34771	KCNAB2	8514	protein-coding
chr1	6010549	6011118	0#	2#[AGGGGAAG:329:0.9496545689046608] [CTTCCTGT:390:0.8896519339525494]	4#[TGACCT:109:1.0] [TGACCC:181:0.8857896050338628] [TGACCC:213:0.8857896050338628] [TGACCC:258:0.8857896050338628]	571	344	148	974.66	41.59	0	+	NM_001199861	Body	Gene Body	5974944	35949	KCNAB2	8514	protein-coding
chr1	6008700	6009176	0#	3#[CTTCCTGT:76:0.8896519339525494] [CTTCCTGT:277:0.8896519339525494] [GTTCCCCT:336:0.8775610514984932]	2#[TGACCT:327:1.0] [GGGTCA:156:0.8857896050338628]	478	286	40	120.59	10.61	0.07	+	NM_003636	PP	Proximal Promoter	6008659	327	KCNAB2	8514	protein-coding
chr1	6182924	6183579	0#	0#	1#[TGACCA:283:0.8180826906887997]	657	354	67	343.56	25.21	0.02	-	NM_000983	PP	Proximal Promoter	6182266	1012	RPL22	6146	protein-coding
chr1	6186851	6187168	0#	0#	0#	319	139	21	118.01	17.32	0.08	+	NM_207396	PP	Proximal Promoter	6188775	-1785	RNF207	388591	protein-coding
chr1	6195264	6195582	0#	3#[CTTCCCCT:225:0.9496545689046608] [GGAGGAAG:70:0.9250330832242935] [GGAGGAAG:179:0.9250330832242935]	2#[AGGTCA:285:1.0] [TGACCG:240:0.8490319803691448]	320	205	52	468.77	50.85	0	+	NM_207396	Body	Gene Body	6188775	6694	RNF207	388591	protein-coding
chr1	6227689	6228076	0#	4#[CTTCCCCT:14:0.9496545689046608] [CTTCCCCT:29:0.9496545689046608] [CTTCCCCA:57:0.925367388796723] [CTTCCGCA:108:0.9127472828626235]	0#	389	111	39	142.05	9.05	0.04	+	NM_001024598	Body	Gene Body	6226838	962	HES3	390992	protein-coding
chr1	6414902	6415567	1#[AAAAGGGGAAGTC:503:0.8511031310086757]	0#	3#[TGACCT:183:1.0] [AGGTCA:651:1.0] [TGACCC:175:0.8857896050338628]	667	520	71	479.8	47.64	0	+	NM_031475	Body	Gene Body	6407434	7988	ESPN	83715	protein-coding
chr1	6489696	6490130	0#	1#[TGAGGAAG:209:0.9757128198920622]	4#[TGACCT:141:1.0] [GGGTCA:158:0.8857896050338628] [TGACCC:252:0.8857896050338628] [TGGTCA:28:0.8180826906887997]	436	173	39	188.53	19.38	0.04	-	NM_198681	Body	Gene Body	6502708	-12839	PLEKHG5	57449	protein-coding
chr1	6491523	6492626	1#[CACTTCCCGATTC:880:0.8096571440251085]	4#[AGAGGAAG:613:1.0] [AGCGGAAG:540:0.9370344629705611] [ACAGGAAG:256:0.8896519339525494] [GTTCCTCC:1048:0.8529395658181256]	1#[TGACCC:775:0.8857896050338628]	1105	578	220	1578.6	65.66	0	-	NM_198681	Body	Gene Body	6502708	-10607	PLEKHG5	57449	protein-coding
chr1	6564357	6565292	1#[TAATCAGGAAGTG:735:0.8187973599993489]	5#[GGAGGAAG:421:0.9250330832242935] [GTTCCTCA:554:0.9036193024858946] [TTTCCTCT:178:0.8910059604551641] [CTTCCTGA:85:0.8653647538446115] [GTTCCCCA:157:0.8532738713905553]	4#[TGACCT:36:1.0] [TGACCT:47:1.0] [TGACCT:854:1.0] [TGACCA:415:0.8180826906887997]	937	402	79	326.81	20.35	0.02	+	NM_005341	Body	Gene Body	6562649	2110	ZBTB48	3104	protein-coding
chr1	6573801	6574552	0#	2#[AGAGGAAG:592:1.0] [ACAGGAAG:661:0.8896519339525494]	2#[CGGTCA:379:0.8490319803691448] [TGGTCA:656:0.8180826906887997]	753	274	71	467.43	44.35	0	-	NM_014851	Body	Gene Body	6585516	-11441	KLHL21	9903	protein-coding
chr1	6582119	6582821	1#[CACTTCCTGCTTT:430:0.8439861064085148]	1#[CTTCCGCA:49:0.9127472828626235]	1#[TGACCA:163:0.8180826906887997]	704	459	76	393.95	34.23	0.03	-	NM_014851	Body	Gene Body	6585516	-2938	KLHL21	9903	protein-coding
chr1	6715340	6715839	0#	3#[AGAGGAAG:162:1.0] [AGGGGAAG:109:0.9496545689046608] [AGCGGAAG:398:0.9370344629705611]	0#	501	186	30	237.12	30.23	0.03	-	NM_018198	UE	Upstream Enhancer	6684553	30973	DNAJC11	55735	protein-coding
chr1	6726246	6726803	0#	3#[CTTCCTCC:224:0.9250330832242935] [CTTCCTCC:395:0.9250330832242935] [GTTCCCCT:159:0.8775610514984932]	1#[TGACCT:280:1.0]	559	139	39	184.72	14.53	0.04	+	NM_015215	UE	Upstream Enhancer	6767970	-41585	CAMTA1	23261	protein-coding
chr1	6908455	6908778	0#	2#[CTTCCTCT:139:1.0000000000000002] [GTTCCTCC:244:0.8529395658181256]	0#	325	102	26	179.2	27.62	0.04	+	NM_015215	Body	Gene Body	6767970	140587	CAMTA1	23261	protein-coding
chr1	6936624	6936911	0#	0#	1#[TGACCT:77:1.0]	289	83	20	112.24	16.28	0.1	+	NM_015215	Body	Gene Body	6767970	168737	CAMTA1	23261	protein-coding
chr1	7057982	7058316	0#	1#[CTTCCCGT:298:0.83930650285721]	1#[TGACCT:279:1.0]	336	206	30	151.54	17.97	0.04	+	NM_015215	Body	Gene Body	6767970	290218	CAMTA1	23261	protein-coding
chr1	7090964	7091265	0#	2#[CTTCCTCA:144:0.9757128198920624] [AGAGGAAA:251:0.8910059604551641]	0#	303	151	37	344.72	44.85	0.02	+	NM_015215	Body	Gene Body	6767970	323145	CAMTA1	23261	protein-coding
chr1	7754074	7754471	0#	2#[GGAGGAAG:200:0.9250330832242935] [AGAGGAAT:268:0.840598909800833]	0#	399	214	22	121.44	24.71	0.07	+	NM_004781	PP	Proximal Promoter	7753915	373	VAMP3	9341	protein-coding
chr1	7924925	7925392	0#	6#[TGGGGAAG:58:0.925367388796723] [GGAGGAAG:264:0.9250330832242935] [AGAGGAAA:131:0.8910059604551641] [AGGGGAAC:28:0.8775610514984932] [ACGGGAAG:254:0.83930650285721] [AGAAGAAG:242:0.839218783233912]	0#	469	332	33	185	15.12	0.04	-	NM_001561	PP	Proximal Promoter	7925812	-555	TNFRSF9	3604	protein-coding
chr1	8264527	8265242	1#[AAAAAGGGAACTG:383:0.8011363806385269]	2#[CTTCCTCT:161:1.0000000000000002] [GGAGGAAG:447:0.9250330832242935]	4#[AGGTCA:106:1.0] [GGGTCA:228:0.8857896050338628] [TGGTCA:172:0.8180826906887997] [TGGTCA:490:0.8180826906887997]	717	436	41	140.13	10	0.04	+	NM_001080397	UE	Upstream Enhancer	8306976	-42013	SLC45A1	50651	protein-coding
chr1	8265600	8266343	1#[TAAAGAGGAACTG:460:0.8673619137899203]	1#[GGAGGAAG:220:0.9250330832242935]	2#[GGGTCA:283:0.8857896050338628] [TGGTCA:269:0.8180826906887997]	745	475	83	803.24	95.29	0	+	NM_001080397	UE	Upstream Enhancer	8306976	-40901	SLC45A1	50651	protein-coding
chr1	8373358	8373619	0#	1#[CTTCCCCT:105:0.9496545689046608]	0#	263	107	34	290.99	36.18	0.04	-	NM_001042682	Body	Gene Body	8406334	-32869	RERE	473	protein-coding
chr1	8391806	8392255	0#	3#[GGGGGAAG:309:0.8746876521289542] [AGAGGAAT:44:0.840598909800833] [AGAGGAAT:294:0.840598909800833]	0#	451	244	31	160.71	20.08	0.03	-	NM_001042682	Body	Gene Body	8406334	-14284	RERE	473	protein-coding
chr1	8413620	8414071	1#[AAAGCAGGAAGTG:204:0.8439861064085147]	0#	1#[TGACCC:15:0.8857896050338628]	453	220	26	132.6	23.26	0.05	-	NM_001042681	Body	Gene Body	8800286	-386446	RERE	473	protein-coding
chr1	8421620	8421852	0#	1#[GGGGGAAG:135:0.8746876521289542]	0#	234	147	25	196.14	27.21	0.04	-	NM_001042681	Body	Gene Body	8800286	-378519	RERE	473	protein-coding
chr1	8440415	8440758	1#[CACTTCCTGTTTC:227:0.9086577518626905]	1#[CTTCCTCT:198:1.0000000000000002]	1#[TGACCT:60:1.0]	345	213	56	443.52	40.7	0.03	-	NM_001042681	Body	Gene Body	8800286	-359658	RERE	473	protein-coding
chr1	8458727	8459074	1#[AAATGAGGAAATG:145:0.818465308360904]	1#[CTTCCACA:124:0.8565942509560106]	0#	349	196	23	169.61	25.19	0.03	-	NM_001042681	Body	Gene Body	8800286	-341363	RERE	473	protein-coding
chr1	8508402	8508954	0#	1#[CTTCCCCT:203:0.9496545689046608]	2#[TGACCT:173:1.0] [TGACCC:238:0.8857896050338628]	554	427	54	142.28	10.07	0.04	-	NM_001042681	Body	Gene Body	8800286	-291457	RERE	473	protein-coding
chr1	8555263	8555560	1#[AAAACAGGAAGTC:69:0.8162075240398106]	0#	0#	299	79	17	139.71	38.4	0.04	-	NM_001042681	Body	Gene Body	8800286	-244944	RERE	473	protein-coding
chr1	8608231	8608460	0#	3#[CTTCCTCT:42:1.0000000000000002] [CTTCCTCT:107:1.0000000000000002] [TCAGGAAG:209:0.8653647538446115]	0#	231	97	13	110.72	25.6	0.1	-	NM_001042681	Body	Gene Body	8800286	-191958	RERE	473	protein-coding
chr1	8612456	8612865	0#	0#	0#	411	192	39	344.97	42.64	0.03	-	NM_001042681	Body	Gene Body	8800286	-187638	RERE	473	protein-coding
chr1	8649654	8649854	0#	1#[CTTCCTCA:77:0.9757128198920624]	0#	202	74	18	153.79	30.41	0.03	-	NM_001042681	Body	Gene Body	8800286	-150558	RERE	473	protein-coding
chr1	8695414	8695714	1#[AAAACAGGAAGTC:102:0.8162075240398106]	1#[TCAGGAAG:79:0.8653647538446115]	1#[AGGTCA:85:1.0]	302	129	64	559.35	38.63	0	-	NM_001042681	Body	Gene Body	8800286	-104743	RERE	473	protein-coding
chr1	8803795	8804003	0#	0#	0#	210	125	13	110.68	25.58	0.1	-	NM_001042681	UE	Upstream Enhancer	8800286	3634	RERE	473	protein-coding
chr1	8823172	8823385	0#	1#[CTTCCTCA:109:0.9757128198920624]	1#[TGACCA:42:0.8180826906887997]	215	115	34	315.78	37.5	0.02	-	NM_001042681	UE	Upstream Enhancer	8800286	23001	RERE	473	protein-coding
chr1	8861134	8861637	0#	2#[AGAGGAAG:118:1.0] [CTTCCCCA:76:0.925367388796723]	0#	505	249	49	213.51	20.23	0.04	+	NR_038351	PP	Proximal Promoter	8861480	-97	ENO1-AS1	100505975	miscRNA
chr1	8856168	8856609	0#	3#[AGGGGAAG:205:0.9496545689046608] [CTTCCTGA:180:0.8653647538446115] [GTTCCCCA:72:0.8532738713905553]	0#	443	230	45	253.88	24.9	0.03	-	NM_001428	Body	Gene Body	8861738	-5340	ENO1	2023	protein-coding
chr1	8920751	8921226	1#[AAAGGAGGAAGTG:173:0.9191103661697848]	1#[TTTCCCCT:311:0.8406605293598248]	3#[AGGTCA:159:1.0] [TGACCC:2:0.8857896050338628] [TGACCC:396:0.8857896050338628]	477	191	52	318.99	21.26	0.02	+	NM_001270500	UE	Upstream Enhancer	8928479	-7537	CA6	765	protein-coding
chr1	8931156	8931336	0#	2#[TGAGGAAG:63:0.9757128198920622] [ACAGGAAG:87:0.8896519339525494]	0#	182	80	16	132.85	24.92	0.05	+	NM_001270500	Body	Gene Body	8928479	2757	CA6	765	protein-coding
chr1	9052042	9052696	0#	0#	0#	656	317	85	629.27	39.11	0	-	NM_003039	PP	Proximal Promoter	9052474	-115	SLC2A5	6518	protein-coding
chr1	9057587	9058092	0#	4#[AGAGGAAG:237:1.0] [AGGGGAAA:166:0.8406605293598248] [CTTCCCGT:325:0.83930650285721] [AGAAGAAG:374:0.839218783233912]	0#	507	266	52	422.51	38.23	0.03	-	NM_003039	UE	Upstream Enhancer	9052474	5379	SLC2A5	6518	protein-coding
chr1	9058902	9059079	0#	0#	0#	179	84	15	116.53	21.14	0.08	-	NM_003039	UE	Upstream Enhancer	9052474	6512	SLC2A5	6518	protein-coding
chr1	9065994	9066275	0#	0#	2#[TGACCT:140:1.0] [AGGTCA:260:1.0]	283	133	26	194.02	27.62	0.04	-	NM_003039	UE	Upstream Enhancer	9052474	13653	SLC2A5	6518	protein-coding
chr1	9076314	9076608	0#	1#[CTTCCTCA:130:0.9757128198920624]	1#[TGACCT:167:1.0]	296	85	23	135.89	22.95	0.05	-	NM_003039	UE	Upstream Enhancer	9052474	23925	SLC2A5	6518	protein-coding
chr1	9102313	9102738	0#	1#[AGTGGAAG:165:0.8808814310639483]	2#[CGGTCA:247:0.8490319803691448] [TGACCA:255:0.8180826906887997]	427	195	24	118.04	14.9	0.08	-	NM_024980	Body	Gene Body	9111816	-9308	GPR157	80045	protein-coding
chr1	9222285	9222722	0#	3#[CTTCCGCT:286:0.9370344629705614] [CTTCCTCC:57:0.9250330832242935] [CTTCCTCC:189:0.9250330832242935]	2#[TGACCT:126:1.0] [GGGTCA:32:0.8857896050338628]	439	290	53	323.5	20.76	0.02	+	NM_004285	Body	Gene Body	9217449	5126	H6PD	9563	protein-coding
chr1	9283175	9283652	0#	3#[AGAGGAAG:193:1.0] [TGAGGAAG:254:0.9757128198920622] [AGTGGAAG:356:0.8808814310639483]	3#[TGACCT:102:1.0] [TGACCG:144:0.8490319803691448] [TGACCA:76:0.8180826906887997]	479	190	53	277.23	17.44	0.04	+	NM_025106	Body	Gene Body	9275527	7838	SPSB1	80176	protein-coding
chr1	9323551	9324057	1#[CACTTCCCCTTTC:188:0.9435533588315557]	3#[CTTCCCCT:449:0.9496545689046608] [CTTCCTCC:115:0.9250330832242935] [NTTCCCCT:200:0.8845564354186268]	0#	508	182	43	264.69	24.42	0.04	+	NM_025106	Body	Gene Body	9275527	48206	SPSB1	80176	protein-coding
chr1	9345186	9345649	0#	5#[TGCGGAAG:15:0.9127472828626235] [GTTCCTCA:257:0.9036193024858946] [CTTCCTGA:297:0.8653647538446115] [TGTGGAAG:229:0.8565942509560106] [TGCGGAAC:39:0.8406537654564559]	1#[TGACCT:56:1.0]	465	290	44	243.62	26.83	0.03	+	NM_025106	Body	Gene Body	9275527	69949	SPSB1	80176	protein-coding
chr1	9380901	9381385	1#[CACTTCCTCTCTC:146:0.8159749523179658]	0#	0#	486	149	47	262.41	28.62	0.04	+	NM_025106	DE	DownStream Enhancer	9275527	105523	SPSB1	80176	protein-coding
chr1	9383125	9383622	0#	1#[AGGGGAAG:304:0.9496545689046608]	0#	499	302	39	127.5	15.09	0.06	+	NM_025106	DE	DownStream Enhancer	9275527	107900	SPSB1	80176	protein-coding
chr1	9492830	9493243	1#[CAAAGGGGAAGTG:111:0.9177873454902451]	0#	2#[TGACCT:148:1.0] [TGGTCA:86:0.8180826906887997]	415	139	51	463.22	54.82	0	+	NM_032315	UE	Upstream Enhancer	9522114	-29145	SLC25A33	84275	protein-coding
chr1	9522321	9523072	0#	4#[CTTCCTCA:255:0.9757128198920624] [GGAGGAAG:200:0.9250330832242935] [GTTCCTCA:502:0.9036193024858946] [CTTCCCCG:169:0.8336868838942818]	2#[AGGTCA:522:1.0] [TGACCG:274:0.8490319803691448]	753	244	49	177.54	17.51	0.04	+	NM_032315	PP	Proximal Promoter	9522114	451	SLC25A33	84275	protein-coding
chr1	9523415	9523794	1#[GACTTCCTTTTTT:211:0.8180284782478887]	2#[CTTCCTCT:239:1.0000000000000002] [CTTCCGCC:294:0.8620675461948546]	0#	381	219	28	197.1	29.9	0.04	+	NM_032315	Body	Gene Body	9522114	1520	SLC25A33	84275	protein-coding
chr1	9575823	9576517	0#	1#[CTTCCCCC:31:0.874687652128954]	3#[TGACCT:549:1.0] [GGGTCA:659:0.8857896050338628] [TGGTCA:84:0.8180826906887997]	696	414	50	206.36	20.76	0.03	+	NM_001130924	Body	Gene Body	9571518	4719	TMEM201	199953	protein-coding
chr1	9609495	9609930	0#	1#[GGAGGAAG:187:0.9250330832242935]	0#	437	222	36	184.5	15.21	0.04	+	NM_005026	UE	Upstream Enhancer	9634376	-24659	PIK3CD	5293	protein-coding
chr1	9611800	9613129	1#[CACTTCCTGTTTT:710:0.9248757402387298]	3#[CTTCCTCG:1210:0.8840323149896212] [CTTCCCCC:122:0.874687652128954] [CTTCCCCG:654:0.8336868838942818]	7#[TGACCT:420:1.0] [AGGTCA:431:1.0] [TGACCC:228:0.8857896050338628] [GGGTCA:475:0.8857896050338628] [GGGTCA:813:0.8857896050338628] [GGGTCA:1126:0.8857896050338628] [TGACCA:1264:0.8180826906887997]	1331	693	238	1275.5	49.42	0	+	NM_005026	UE	Upstream Enhancer	9634376	-21883	PIK3CD	5293	protein-coding
chr1	9634092	9634502	0#	1#[GGGGGAAG:149:0.8746876521289542]	0#	412	222	21	110.2	15.99	0.1	+	NM_005026	PP	Proximal Promoter	9634376	-62	PIK3CD	5293	protein-coding
chr1	9635125	9635454	0#	3#[CTTCCTCA:172:0.9757128198920624] [AGGGGAAC:209:0.8775610514984932] [CGGGGAAG:284:0.8336868838942818]	0#	331	223	26	177.25	29.07	0.04	+	NM_005026	PP	Proximal Promoter	9634376	972	PIK3CD	5293	protein-coding
chr1	9667532	9667770	1#[AAAGAAGGAAGTG:134:0.8458070606165926]	2#[TGAGGAAG:125:0.9757128198920622] [TCAGGAAG:78:0.8653647538446115]	1#[AGGTCA:67:1.0]	240	154	38	255.22	20.93	0.03	+	NM_005026	Body	Gene Body	9634376	33310	PIK3CD	5293	protein-coding
chr1	9669706	9670075	0#	1#[GGAGGAAC:200:0.8529395658181258]	0#	371	130	29	123.09	10.78	0.07	+	NM_005026	Body	Gene Body	9634376	35460	PIK3CD	5293	protein-coding
chr1	9674257	9674598	1#[GAATGGGGAAGTG:137:0.8847814037863783]	1#[AGAGGAAG:98:1.0]	1#[TGACCC:110:0.8857896050338628]	343	148	36	235.31	23.93	0.03	+	NM_005026	Body	Gene Body	9634376	40029	PIK3CD	5293	protein-coding
chr1	9687341	9687677	0#	2#[AGAGGAAC:171:0.9279064825938323] [GGAGGAAG:205:0.9250330832242935]	1#[TGGTCA:30:0.8180826906887997]	338	213	112	1259.75	88.79	0	+	NM_005026	Body	Gene Body	9634376	53178	PIK3CD	5293	protein-coding
chr1	9699963	9700897	1#[AAAACAGGAAGTG:463:0.9248757402387296]	6#[CTTCCTCT:220:1.0000000000000002] [AGAGGAAG:384:1.0] [CTTCCCCT:6:0.9496545689046608] [GGGGGAAG:605:0.8746876521289542] [GTTCCGCA:254:0.8406537654564559] [CTTCCCCG:203:0.8336868838942818]	3#[TGACCC:116:0.8857896050338628] [TGGTCA:139:0.8180826906887997] [TGACCA:416:0.8180826906887997]	936	478	149	979.54	58.14	0	+	NM_005026	Body	Gene Body	9634376	66065	PIK3CD	5293	protein-coding
chr1	9636537	9637548	0#	1#[CTTCCCCC:249:0.874687652128954]	1#[AGGTCA:953:1.0]	1013	717	83	301.48	23.56	0.03	-	NR_027045	PP	Proximal Promoter	9637231	23	C1orf200	644997	miscRNA
chr1	9842674	9843019	0#	2#[CTTCCTCC:103:0.9250330832242935] [AGGGGAAC:220:0.8775610514984932]	0#	347	232	31	119.91	13.83	0.08	-	NM_020248	Body	Gene Body	9892903	-49997	CTNNBIP1	56998	protein-coding
chr1	9875737	9876226	0#	1#[AGGGGAAA:44:0.8406605293598248]	0#	491	290	36	191.66	22.2	0.04	-	NM_020248	Body	Gene Body	9892903	-16876	CTNNBIP1	56998	protein-coding
chr1	9933501	9933961	0#	1#[AGAGGAAC:248:0.9279064825938323]	1#[AGGTCA:18:1.0]	462	288	47	286.94	29.07	0.04	+	NM_022787	Body	Gene Body	9926072	7717	NMNAT1	64802	protein-coding
chr1	9975609	9975953	0#	1#[AGAGGAAC:105:0.9279064825938323]	2#[AGGTCA:300:1.0] [TGACCG:323:0.8490319803691448]	346	137	25	126.2	21.12	0.07	+	NM_052960	UE	Upstream Enhancer	9979841	-4095	RBP7	116362	protein-coding
chr1	10047093	10047399	0#	3#[TTTCCTCT:193:0.8910059604551641] [ACAGGAAG:80:0.8896519339525494] [CTTCCTGT:121:0.8896519339525494]	1#[GGGTCA:75:0.8857896050338628]	308	154	18	148.9	30.72	0.04	+	NM_006048	Body	Gene Body	10015627	31620	UBE4B	10277	protein-coding
chr1	10066523	10066820	1#[CACTTCCTGTTTT:90:0.9248757402387298]	0#	1#[GGGTCA:6:0.8857896050338628]	299	83	23	169.65	28.24	0.03	+	NM_006048	Body	Gene Body	10015627	50979	UBE4B	10277	protein-coding
chr1	10191271	10191535	0#	2#[GTTCCTCT:187:0.9279064825938323] [TCAGGAAG:232:0.8653647538446115]	0#	266	160	28	183.67	21.65	0.04	+	NM_015074	PP	Proximal Promoter	10193350	-1919	KIF1B	23095	protein-coding
chr1	10359947	10360329	0#	0#	1#[TGGTCA:322:0.8180826906887997]	384	225	49	194.41	13.4	0.04	+	NM_015074	Body	Gene Body	10193350	166822	KIF1B	23095	protein-coding
chr1	10367843	10368271	0#	2#[AGAGGAAC:174:0.9279064825938323] [GGAGGAAG:227:0.9250330832242935]	1#[AGGTCA:343:1.0]	430	244	54	529.02	69.77	0	+	NM_015074	DE	DownStream Enhancer	10193350	174737	KIF1B	23095	protein-coding
chr1	10370871	10371261	0#	1#[AGAGGAAG:89:1.0]	0#	392	115	44	218.36	19.53	0.04	+	NM_002631	UE	Upstream Enhancer	10381671	-10685	PGD	5226	protein-coding
chr1	10397801	10398396	0#	3#[ACAGGAAG:381:0.8896519339525494] [CTTCCCCC:288:0.874687652128954] [TTTCCTCA:541:0.8667187803472263]	1#[TGACCT:36:1.0]	597	121	56	323.41	20.83	0.02	+	NM_002631	Body	Gene Body	10381671	16251	PGD	5226	protein-coding
chr1	10413305	10413633	0#	2#[GGAGGAAG:118:0.9250330832242935] [TTTCCCCT:201:0.8406605293598248]	0#	330	132	27	143	19.19	0.04	+	NM_199006	PP	Proximal Promoter	10412745	692	APITD1-CORT	100526739	protein-coding
chr1	10450612	10450919	0#	1#[CTTCCTCA:129:0.9757128198920624]	1#[TGGTCA:221:0.8180826906887997]	309	107	32	299.05	49.56	0.04	-	NM_213566	Body	Gene Body	10455200	-4481	DFFA	1676	protein-coding
chr1	10455561	10455750	1#[GAAAGGGGAAATG:61:0.8207906222376369]	0#	0#	191	80	22	136.98	16.61	0.04	-	NM_213566	PP	Proximal Promoter	10455200	441	DFFA	1676	protein-coding
chr1	10498233	10498770	1#[GAAAAAGGAAGTG:172:0.9104787060707681]	1#[TTTCCCCT:464:0.8406605293598248]	1#[TGGTCA:240:0.8180826906887997]	539	196	130	1328.74	98.04	0	+	NM_004565	Body	Gene Body	10457589	40840	PEX14	5195	protein-coding
chr1	10533556	10533890	0#	1#[AGAGGAAG:74:1.0]	2#[TGACCT:173:1.0] [TGACCT:293:1.0]	336	129	27	194.49	26.71	0.04	+	NM_004565	Body	Gene Body	10457589	76096	PEX14	5195	protein-coding
chr1	10670121	10670517	0#	2#[GGAGGAAG:215:0.9250330832242935] [CGGGGAAG:131:0.8336868838942818]	1#[TGGTCA:304:0.8180826906887997]	398	228	49	213.51	19.54	0.04	-	NM_001079843	Body	Gene Body	10779320	-108971	CASZ1	54897	protein-coding
chr1	10681639	10682202	0#	3#[CTTCCCCT:230:0.9496545689046608] [CTTCCCCC:365:0.874687652128954] [GGAGGAAC:270:0.8529395658181258]	1#[TGACCC:459:0.8857896050338628]	565	345	40	239.09	31.53	0.03	-	NM_001079843	Body	Gene Body	10779320	-97336	CASZ1	54897	protein-coding
chr1	10762539	10762987	2#[CACTTCCTCCTTA:209:0.8718039409755814] [CAAGAAGGAAGTG:380:0.8038230588992432]	0#	3#[TGACCT:186:1.0] [AGGTCA:336:1.0] [TGACCC:23:0.8857896050338628]	450	212	71	639.67	61.33	0	-	NM_001079843	Body	Gene Body	10779320	-16569	CASZ1	54897	protein-coding
chr1	10775933	10776338	0#	2#[AGAGGAAG:193:1.0] [AGGGGAAA:182:0.8406605293598248]	0#	407	208	38	337.1	55.18	0.02	-	NM_001079843	Body	Gene Body	10779320	-3179	CASZ1	54897	protein-coding
chr1	10813384	10814051	0#	4#[AGAGGAAG:226:1.0] [AGGGGAAG:354:0.9496545689046608] [ACAGGAAG:342:0.8896519339525494] [GTTCCCCA:461:0.8532738713905553]	2#[TGACCT:590:1.0] [GGGTCA:416:0.8857896050338628]	669	353	59	398.15	35.01	0.03	-	NM_001079843	UE	Upstream Enhancer	10779320	34417	CASZ1	54897	protein-coding
chr1	10943584	10943926	0#	0#	1#[CGGTCA:88:0.8490319803691448]	344	216	24	118.04	15	0.08	-	NM_001170754	Body	Gene Body	10964681	-20881	C1orf127	148345	protein-coding
chr1	10947674	10948151	1#[GAAAGGGGAAGTG:302:0.9435533588315553]	3#[AGAGGAAG:185:1.0] [CTTCCCCC:227:0.874687652128954] [TGAGGAAA:319:0.8667187803472263]	1#[GGGTCA:274:0.8857896050338628]	479	323	55	281.64	17.78	0.04	-	NM_001170754	Body	Gene Body	10964681	-16684	C1orf127	148345	protein-coding
chr1	11133659	11134422	1#[AAAAGAGGAACTG:333:0.914668338984124]	1#[TGAGGAAG:40:0.9757128198920622]	2#[AGGTCA:69:1.0] [GGGTCA:633:0.8857896050338628]	765	342	122	1022.33	78.95	0	-	NM_004958	Body	Gene Body	11245195	-111194	MTOR	2475	protein-coding
chr1	11499053	11499483	0#	2#[CTTCCTCT:224:1.0000000000000002] [CTTCCTCA:124:0.9757128198920624]	1#[TGACCA:160:0.8180826906887997]	432	204	20	120.94	25.19	0.07	+	NM_020780	Body	Gene Body	11461881	37376	PTCHD2	57540	protein-coding
chr1	11545889	11546683	1#[TAAAGAGGAAGTG:465:0.9526935748057962]	0#	0#	796	495	137	887.16	48.26	0	+	NM_020780	DE	DownStream Enhancer	11461881	84503	PTCHD2	57540	protein-coding
chr1	11675722	11676242	0#	2#[TTTCCTCT:281:0.8910059604551641] [CTTCCTGT:4:0.8896519339525494]	3#[GGGTCA:126:0.8857896050338628] [TGACCA:342:0.8180826906887997] [TGGTCA:357:0.8180826906887997]	522	275	59	257.03	19.38	0.04	+	NM_198545	Body	Gene Body	11674367	1630	C1orf187	374946	protein-coding
chr1	11701872	11702690	0#	3#[TGAGGAAG:226:0.9757128198920622] [AGGGGAAG:291:0.9496545689046608] [TGGGGAAC:552:0.8532738713905553]	1#[TGACCC:329:0.8857896050338628]	820	171	52	121.43	8.41	0.07	+	NM_198545	Body	Gene Body	11674367	27676	C1orf187	374946	protein-coding
chr1	11712135	11712623	1#[CACTTCCTCGTTC:235:0.8800784730262098]	2#[AGAGGAAG:175:1.0] [AGTGGAAG:208:0.8808814310639483]	1#[TGACCA:419:0.8180826906887997]	490	232	53	248.59	23.26	0.03	+	NM_001040196	UE	Upstream Enhancer	11718728	-6361	AGTRAP	57085	protein-coding
chr1	11721148	11721923	1#[GACTTCCTCATTT:503:0.8325598287559037]	0#	3#[AGGTCA:169:1.0] [AGGTCA:188:1.0] [TGACCT:626:1.0]	777	506	102	493.01	30.49	0	+	NM_001040196	Body	Gene Body	11718728	2926	AGTRAP	57085	protein-coding
chr1	11723427	11723921	0#	5#[CTTCCTCA:440:0.9757128198920624] [CTTCCTGT:172:0.8896519339525494] [CTTCCTGT:277:0.8896519339525494] [CTTCCACT:309:0.8808814310639483] [CTTCCCCC:416:0.874687652128954]	1#[TGACCA:458:0.8180826906887997]	496	255	52	322.42	22.47	0.02	+	NM_001040196	Body	Gene Body	11718728	4954	AGTRAP	57085	protein-coding
chr1	11825498	11825661	0#	0#	0#	165	82	21	159.4	20.15	0.03	+	NM_001256959	Body	Gene Body	11788739	36841	CLCN6	1185	protein-coding
chr1	11840140	11840559	0#	4#[CTTCCTCT:152:1.0000000000000002] [AGAGGAAA:388:0.8910059604551641] [TGAGGAAA:103:0.8667187803472263] [TTTCCTCA:313:0.8667187803472263]	0#	421	172	23	125.36	23.26	0.07	-	NM_002521	Body	Gene Body	11841579	-1267	NPPB	4879	protein-coding
chr1	11917351	11917845	0#	1#[CTTCCCCT:308:0.9496545689046608]	0#	496	307	69	391.54	31.65	0.03	+	NM_000302	PP	Proximal Promoter	11917310	348	PLOD1	5351	protein-coding
chr1	11960890	11961374	1#[AAAAGAGGAAATG:148:0.8772372634060811]	1#[GTTCCTCT:205:0.9279064825938323]	0#	486	235	35	148.22	15.34	0.04	+	NM_001127660	PP	Proximal Promoter	11962824	-1699	MFN2	9927	protein-coding
chr1	11962785	11963222	0#	0#	0#	439	257	58	320.32	26.16	0.02	+	NM_001127660	PP	Proximal Promoter	11962824	218	MFN2	9927	protein-coding
chr1	11968437	11968915	0#	2#[TTTCCTCT:6:0.8910059604551641] [AGAGGAAT:270:0.840598909800833]	1#[GGGTCA:246:0.8857896050338628]	480	250	45	203.63	17.44	0.03	+	NM_001127660	Body	Gene Body	11962824	5863	MFN2	9927	protein-coding
chr1	12115515	12116093	0#	1#[CTTCCCCT:395:0.9496545689046608]	0#	580	386	52	355.54	44.11	0.03	+	NM_001243	Body	Gene Body	12046020	69881	TNFRSF8	943	protein-coding
chr1	12133114	12133424	0#	3#[TGAGGAAG:38:0.9757128198920622] [GTTCCTCA:231:0.9036193024858946] [TCAGGAAG:110:0.8653647538446115]	1#[TGACCC:284:0.8857896050338628]	312	233	27	120.03	10.16	0.08	+	NM_001066	UE	Upstream Enhancer	12149646	-16299	TNFRSF1B	7133	protein-coding
chr1	12140448	12141022	0#	7#[AGAGGAAG:274:1.0] [AGAGGAAC:106:0.9279064825938323] [TGGGGAAG:551:0.925367388796723] [AGAGGAAA:353:0.8910059604551641] [AGGGGAAC:363:0.8775610514984932] [TGAGGAAA:85:0.8667187803472263] [GTTCCTCC:319:0.8529395658181256]	0#	576	324	85	666.1	49.39	0	+	NM_001066	UE	Upstream Enhancer	12149646	-8874	TNFRSF1B	7133	protein-coding
chr1	12146866	12147292	1#[CACTTCCTCTTAC:219:0.815885524740903]	1#[TGGGGAAG:161:0.925367388796723]	1#[AGGTCA:63:1.0]	428	217	37	206.44	22.1	0.03	+	NM_001066	UE	Upstream Enhancer	12149646	-2563	TNFRSF1B	7133	protein-coding
chr1	12151080	12151465	0#	1#[CTTCCTGA:258:0.8653647538446115]	4#[GGGTCA:7:0.8857896050338628] [GGGTCA:76:0.8857896050338628] [GGGTCA:150:0.8857896050338628] [TGACCA:263:0.8180826906887997]	387	242	35	193.01	22.36	0.04	+	NM_001066	Body	Gene Body	12149646	1676	TNFRSF1B	7133	protein-coding
chr1	12156304	12156793	0#	3#[GGAGGAAG:266:0.9250330832242935] [CTTCTTCT:465:0.8392187832339122] [CTTCTTCT:474:0.8392187832339122]	1#[TGACCC:59:0.8857896050338628]	491	270	48	310.62	32.12	0.02	+	NM_001066	Body	Gene Body	12149646	6928	TNFRSF1B	7133	protein-coding
chr1	12166632	12167814	0#	7#[AGAGGAAC:564:0.9279064825938323] [CTTCCCCA:742:0.925367388796723] [TGGGGAAG:1033:0.925367388796723] [GGAGGAAG:461:0.9250330832242935] [GGAGGAAG:519:0.9250330832242935] [GTTCCTCA:324:0.9036193024858946] [TTTCCTCA:57:0.8667187803472263]	3#[TGACCT:290:1.0] [CGGTCA:535:0.8490319803691448] [TGACCA:215:0.8180826906887997]	1184	527	203	1640.2	80.13	0	+	NM_001066	Body	Gene Body	12149646	17513	TNFRSF1B	7133	protein-coding
chr1	12179254	12179717	0#	1#[CTTCCGCA:219:0.9127472828626235]	1#[TGGTCA:440:0.8180826906887997]	465	264	57	285.05	21.63	0.04	+	NM_001066	Body	Gene Body	12149646	29872	TNFRSF1B	7133	protein-coding
chr1	12258126	12258309	0#	0#	1#[GGGTCA:80:0.8857896050338628]	185	75	17	112.08	17.21	0.1	+	NM_018156	Body	Gene Body	12212699	45502	VPS13D	55187	protein-coding
chr1	12327157	12327559	0#	4#[CTTCCTGT:218:0.8896519339525494] [GTTCCCCA:240:0.8532738713905553] [GTTCCTCC:309:0.8529395658181256] [TTTCCCCT:172:0.8406605293598248]	1#[TGACCT:71:1.0]	404	267	34	160.86	14.09	0.03	+	NM_018156	Body	Gene Body	12212699	114725	VPS13D	55187	protein-coding
chr1	12493044	12493286	0#	4#[AGAGGAAG:172:1.0] [CTTCCCCT:79:0.9496545689046608] [CTTCCCCT:102:0.9496545689046608] [TTTCCTCT:90:0.8910059604551641]	1#[TGACCC:40:0.8857896050338628]	244	95	20	142.14	18.44	0.04	+	NM_018156	Body	Gene Body	12212699	280440	VPS13D	55187	protein-coding
chr1	12508239	12508649	0#	2#[AGGGGAAG:166:0.9496545689046608] [AGAGGAAA:221:0.8910059604551641]	0#	412	187	33	117.72	10.78	0.08	+	NR_003022	DE	DownStream Enhancer	12489886	18540	SNORA59B	677882	snoRNA
chr1	12584622	12584968	0#	1#[AGGGGAAG:160:0.9496545689046608]	3#[GGGTCA:298:0.8857896050338628] [TGACCA:115:0.8180826906887997] [TGACCA:220:0.8180826906887997]	348	175	27	143	23.27	0.04	-	NM_004753	Body	Gene Body	12600407	-15610	DHRS3	9249	protein-coding
chr1	12598191	12598621	0#	1#[CTTCCCCT:210:0.9496545689046608]	1#[AGGTCA:271:1.0]	432	199	47	340.76	41.96	0.02	-	NM_004753	Body	Gene Body	12600407	-2017	DHRS3	9249	protein-coding
chr1	12613751	12614092	1#[CACTTCCTCTTGT:238:0.8321738191472476]	1#[TTTCCTCT:191:0.8910059604551641]	2#[TGACCT:29:1.0] [TGACCA:100:0.8180826906887997]	343	243	39	349.46	43.19	0.03	+	NM_001013630	UE	Upstream Enhancer	12627152	-13158	AADACL4	343066	protein-coding
chr1	13693243	13693467	1#[CAGTTCCTCATTG:60:0.8139123822215977]	0#	0#	226	81	27	295.95	56.32	0.04	-	NM_001010847	Body	Gene Body	13712829	-19505	LRRC38	126755	protein-coding
chr1	13707733	13708121	1#[GAAAACGGAAGTG:219:0.8290631628193189]	1#[ATTCCTCT:178:0.840598909800833]	4#[TGACCT:102:1.0] [AGGTCA:273:1.0] [TGACCT:309:1.0] [TGACCA:185:0.8180826906887997]	390	234	24	158.51	27.77	0.03	-	NM_001010847	Body	Gene Body	13712829	-4862	LRRC38	126755	protein-coding
chr1	13989753	13990070	0#	2#[CTTCCTCT:184:1.0000000000000002] [CTTCCTCC:151:0.9250330832242935]	1#[GGGTCA:140:0.8857896050338628]	319	153	18	140.43	30.85	0.04	+	NM_001135610	Body	Gene Body	13899321	90585	PRDM2	7799	protein-coding
chr1	13948423	13948606	0#	2#[TGAGGAAG:91:0.9757128198920622] [TGGGGAAG:58:0.925367388796723]	0#	185	77	16	122.62	21.8	0.07	+	NM_001007257	PP	Proximal Promoter	13948462	38	PRDM2	7799	protein-coding
chr1	14938382	14938968	1#[AACTTCCCCTTTT:358:0.8082753791768467]	1#[TTTCCTCA:476:0.8667187803472263]	1#[GGGTCA:418:0.8857896050338628]	588	338	47	295.77	29.72	0.04	+	NM_201628	Body	Gene Body	14797799	140921	KAZN	23254	protein-coding
chr1	14941091	14941418	1#[AAAGGAGGAACTG:121:0.8337787051539092]	0#	1#[TGACCT:182:1.0]	329	140	26	173.99	22.42	0.04	+	NM_201628	Body	Gene Body	14797799	143432	KAZN	23254	protein-coding
chr1	14954982	14955346	0#	2#[CTTCCTCA:345:0.9757128198920624] [GTTCCTCA:194:0.9036193024858946]	1#[TGACCT:53:1.0]	366	143	37	211.63	20.43	0.04	+	NM_201628	Body	Gene Body	14797799	157326	KAZN	23254	protein-coding
chr1	14977310	14977794	0#	1#[AGAGGAAG:208:1.0]	0#	486	251	32	159.67	22.2	0.03	+	NM_201628	Body	Gene Body	14797799	179762	KAZN	23254	protein-coding
chr1	14985293	14985628	0#	2#[CTTCCTCA:229:0.9757128198920624] [CTTCCCCG:195:0.8336868838942818]	1#[AGGTCA:132:1.0]	337	229	30	178.36	24.49	0.04	+	NM_201628	Body	Gene Body	14797799	187723	KAZN	23254	protein-coding
chr1	14999666	15000065	0#	1#[AGGGGAAG:299:0.9496545689046608]	0#	401	300	29	210.25	26.2	0.04	+	NM_201628	Body	Gene Body	14797799	202167	KAZN	23254	protein-coding
chr1	15210760	15211192	0#	1#[AGAGGAAG:180:1.0]	1#[TGACCT:70:1.0]	434	211	24	118.04	17.66	0.08	+	NM_201628	Body	Gene Body	14797799	413172	KAZN	23254	protein-coding
chr1	15215646	15215857	0#	0#	0#	213	106	26	262.7	44.88	0.04	+	NM_201628	Body	Gene Body	14797799	417953	KAZN	23254	protein-coding
chr1	15444051	15444267	1#[GAGAGAGGAAGTG:51:0.8159749523179656]	1#[CTTCCACT:1:0.8808814310639483]	0#	218	81	14	125.83	33.28	0.07	+	NM_052929	UE	Upstream Enhancer	15446354	-2222	FHAD1	114827	protein-coding
chr1	15445071	15445453	1#[AAAGGGGGAAGTG:168:0.8788817133773799]	2#[AGGGGAAG:111:0.9496545689046608] [GGCGGAAG:99:0.8620675461948546]	0#	384	163	23	146.05	24.92	0.04	+	NM_052929	PP	Proximal Promoter	15446354	-1120	FHAD1	114827	protein-coding
chr1	15460144	15460995	1#[AACTTCCTCTTTC:606:0.8322860435932122]	4#[TGAGGAAG:171:0.9757128198920622] [AGGGGAAC:416:0.8775610514984932] [CTTCCCCC:153:0.874687652128954] [TTTCCTCA:660:0.8667187803472263]	2#[AGGTCA:211:1.0] [GGGTCA:739:0.8857896050338628]	853	588	53	189.47	14.12	0.04	+	NM_052929	Body	Gene Body	15446354	14378	FHAD1	114827	protein-coding
chr1	15544915	15545379	0#	3#[CTTCCTCT:236:1.0000000000000002] [GTTCCTCA:322:0.9036193024858946] [TGTGGAAG:428:0.8565942509560106]	0#	466	200	42	180.78	14.22	0.04	+	NM_052929	Body	Gene Body	15446354	98761	FHAD1	114827	protein-coding
chr1	15561757	15562114	1#[CACTTCCCCATTC:278:0.8847814037863787]	0#	0#	359	278	35	241.16	27.91	0.03	+	NM_052929	Body	Gene Body	15446354	115681	FHAD1	114827	protein-coding
chr1	15610594	15611131	0#	2#[TGGGGAAG:11:0.925367388796723] [GGGGGAAG:433:0.8746876521289542]	2#[TGACCC:382:0.8857896050338628] [TGACCC:518:0.8857896050338628]	539	366	42	120.19	9.92	0.07	+	NM_024329	Body	Gene Body	15608977	1983	EFHD2	79180	protein-coding
chr1	15614918	15615814	0#	9#[GTTCCTCT:322:0.9279064825938323] [CTTCCCCA:292:0.925367388796723] [GGAGGAAG:214:0.9250330832242935] [CTTCCTCG:357:0.8840323149896212] [CTTCCACT:258:0.8808814310639483] [CTTCCACT:411:0.8808814310639483] [GTTCCCCT:561:0.8775610514984932] [TTTCCTCA:477:0.8667187803472263] [GTTCCTCC:248:0.8529395658181256]	2#[GGGTCA:178:0.8857896050338628] [GGGTCA:629:0.8857896050338628]	898	586	198	1514.97	57.46	0	+	NM_024329	Body	Gene Body	15608977	6527	EFHD2	79180	protein-coding
chr1	15616567	15617031	0#	3#[AGAGGAAG:168:1.0] [TGGGGAAG:238:0.925367388796723] [CTTCCCGT:395:0.83930650285721]	0#	466	223	49	355.55	28.76	0.03	+	NM_024329	Body	Gene Body	15608977	7813	EFHD2	79180	protein-coding
chr1	15664740	15665342	1#[CACTTCCTTTTTC:282:0.9104787060707685]	1#[AGGGGAAA:258:0.8406605293598248]	0#	604	280	53	244.53	20.29	0.03	+	NM_033440	Body	Gene Body	15655809	9211	CELA2A	63036	protein-coding
chr1	15684751	15685164	1#[CACTTCCTTTTTC:173:0.9104787060707685]	1#[AGGGGAAA:149:0.8406605293598248]	1#[TGACCT:251:1.0]	415	177	26	112.52	14.48	0.1	+	NM_015849	Body	Gene Body	15675182	9746	CELA2B	51032	protein-coding
chr1	15714400	15714717	1#[GAAACAGGAAGTG:135:0.90865775186269]	0#	0#	319	125	30	178.36	20.4	0.04	-	NM_001229	Body	Gene Body	15723527	-9002	CASP9	842	protein-coding
chr1	15763987	15764511	1#[CACTTCCCTTTTT:229:0.886468041654403]	0#	2#[TGACCT:157:1.0] [TGACCC:256:0.8857896050338628]	526	234	29	220.01	39.53	0.04	+	NM_015291	Body	Gene Body	15725938	38283	DNAJC16	23341	protein-coding
chr1	15802829	15803160	0#	1#[TTTCCTCA:190:0.8667187803472263]	0#	333	187	30	151.54	19.36	0.04	+	NM_032341	UE	Upstream Enhancer	15816539	-13523	DDI2	84301	protein-coding
chr1	15839768	15840166	0#	2#[GGAGGAAG:10:0.9250330832242935] [GGAGGAAG:204:0.9250330832242935]	2#[AGGTCA:176:1.0] [GGGTCA:285:0.8857896050338628]	400	209	22	146.64	36.82	0.04	+	NM_032341	Body	Gene Body	15816539	23438	DDI2	84301	protein-coding
chr1	15874977	15875409	1#[CACTTCCTGCTTT:272:0.8439861064085148]	1#[TTTCCTCA:392:0.8667187803472263]	0#	434	313	24	154.09	18.46	0.03	+	NM_015164	UE	Upstream Enhancer	15883413	-8123	PLEKHM2	23207	protein-coding
chr1	15877690	15877947	1#[GCAAGAGGAAGTG:118:0.8159558307712083]	0#	0#	259	155	30	214.14	24.09	0.04	+	NM_015164	UE	Upstream Enhancer	15883413	-5568	PLEKHM2	23207	protein-coding
chr1	15895944	15896556	1#[GAAAAGGGAAGTG:213:0.8702500532783634]	0#	0#	614	233	163	1399.47	69.97	0	+	NM_015164	Body	Gene Body	15883413	12764	PLEKHM2	23207	protein-coding
chr1	15934714	15935368	1#[GAAAGGGGAAGTC:266:0.8348851426326365]	1#[AGAGGAAG:117:1.0]	4#[TGACCT:19:1.0] [TGACCT:516:1.0] [GGGTCA:137:0.8857896050338628] [TGACCC:207:0.8857896050338628]	656	283	61	313.92	26.58	0.02	+	NM_207348	PP	Proximal Promoter	15935395	-398	SLC25A34	284723	protein-coding
chr1	16046468	16046885	0#	3#[CTTCCTCA:52:0.9757128198920624] [GGAGGAAC:222:0.8529395658181258] [CTTCCCCG:164:0.8336868838942818]	0#	419	235	60	366.22	27.36	0.03	+	NM_015001	PP	Proximal Promoter	16046945	-242	SPEN	23013	protein-coding
chr1	16085194	16085697	1#[AAAATAGGAACTG:237:0.8209958935274555]	1#[AGAGGAAT:150:0.840598909800833]	1#[TGACCC:97:0.8857896050338628]	505	292	47	349.84	29.36	0.03	+	NM_015001	Body	Gene Body	16046945	38541	SPEN	23013	protein-coding
chr1	16136634	16137167	1#[CACTTCCTGTTTG:232:0.8828917385213803]	2#[GGAGGAAG:497:0.9250330832242935] [ATTCCTCT:38:0.840598909800833]	0#	535	244	50	157.18	14.05	0.03	+	NM_015001	Body	Gene Body	16046945	89933	SPEN	23013	protein-coding
chr1	16034881	16035276	0#	1#[CTTCCCCC:45:0.874687652128954]	0#	397	230	36	138.75	12.79	0.04	-	NR_024279	Body	Gene Body	16047229	-12118	FLJ37453	729614	miscRNA
chr1	16036028	16036442	1#[CACTTCCTCTTCG:171:0.8075494130390534]	1#[CTTCCCCC:305:0.874687652128954]	0#	416	174	93	1037.92	111.81	0	-	NR_024279	Body	Gene Body	16047229	-11027	FLJ37453	729614	miscRNA
chr1	16048930	16049399	0#	2#[AGAGGAAA:200:0.8910059604551641] [GGAGGAAC:387:0.8529395658181258]	0#	471	229	39	127.5	12.05	0.06	-	NR_024279	PP	Proximal Promoter	16047229	1930	FLJ37453	729614	miscRNA
chr1	16151724	16152183	0#	0#	0#	461	348	45	166.55	16.62	0.03	-	NM_001242884	Body	Gene Body	16175214	-23142	ZBTB17	7709	protein-coding
chr1	16165162	16165558	0#	0#	0#	398	140	24	169.01	27.59	0.03	-	NM_001242884	Body	Gene Body	16175214	-9912	ZBTB17	7709	protein-coding
chr1	16278067	16278521	0#	2#[CTTCCTCT:335:1.0000000000000002] [CTTCCTCC:112:0.9250330832242935]	1#[TGACCC:130:0.8857896050338628]	456	128	30	130.39	9.72	0.06	-	NM_182623	UE	Upstream Enhancer	16272714	5481	FAM131C	348487	protein-coding
chr1	16284610	16285031	1#[CACTTCCTCTTCC:254:0.8333154263803636]	0#	2#[AGGTCA:150:1.0] [GGGTCA:34:0.8857896050338628]	423	256	45	328.15	41.81	0.02	-	NM_182623	UE	Upstream Enhancer	16272714	12152	FAM131C	348487	protein-coding
chr1	16333001	16333370	0#	3#[AGAGGAAG:304:1.0] [GGAGGAAG:185:0.9250330832242935] [GGAGGAAC:175:0.8529395658181258]	2#[AGGTCA:30:1.0] [TGACCC:350:0.8857896050338628]	371	199	22	113.82	19.79	0.1	-	NM_004431	Body	Gene Body	16355169	-21969	EPHA2	1969	protein-coding
chr1	16495763	16496086	0#	0#	0#	325	156	16	121.94	32.86	0.07	-	NM_018994	Body	Gene Body	16551535	-55616	FBXO42	54455	protein-coding
chr1	16565900	16566613	0#	0#	0#	715	182	47	164.26	13.6	0.03	+	NM_015609	PP	Proximal Promoter	16566169	-87	SZRD1	26099	protein-coding
chr1	16590547	16590956	0#	1#[TGAGGAAG:204:0.9757128198920622]	3#[AGGTCA:62:1.0] [TGACCT:162:1.0] [AGGTCA:186:1.0]	411	214	30	113.35	13	0.1	+	NM_015609	Body	Gene Body	16566169	24592	SZRD1	26099	protein-coding
chr1	16632193	16632594	0#	3#[CTTCCTCT:371:1.0000000000000002] [CTTCCTGT:383:0.8896519339525494] [GTTCCCCT:352:0.8775610514984932]	2#[TGACCT:214:1.0] [TGACCC:114:0.8857896050338628]	403	125	46	235.03	22.09	0.03	-	NM_198546	Body	Gene Body	16636506	-4188	SPATA21	374955	protein-coding
chr1	16739763	16739928	1#[TACTTCCCCTTTT:79:0.8211089586748271]	0#	0#	167	83	14	140.42	35.84	0.04	+	NR_037446	UE	Upstream Enhancer	16747995	-8149	MIR3675	100500876	miscRNA
chr1	16812342	16813173	0#	1#[AGGGGAAG:453:0.9496545689046608]	1#[AGGTCA:743:1.0]	833	649	73	132.57	6.92	0.05	-	NM_017940	PP	Proximal Promoter	16812569	422	NBPF1	55672	protein-coding
chr1	16900931	16901391	0#	3#[CTTCCTCC:322:0.9250330832242935] [CTTCCTCC:377:0.9250330832242935] [GTTCCCCA:77:0.8532738713905553]	1#[TGACCT:11:1.0]	462	334	45	228.4	18.6	0.03	-	NR_026567	Body	Gene Body	16919239	-17974	ESPNP	284729	pseudo
chr1	16914235	16915239	2#[GACTTCCCCTTTT:145:0.8511031310086759] [AAAAGGGGAAGTC:800:0.8511031310086757]	1#[CTTCCCCG:416:0.8336868838942818]	3#[TGACCT:4:1.0] [GGGTCA:462:0.8857896050338628] [TGACCA:919:0.8180826906887997]	1006	145	172	1184.19	58.49	0	-	NR_026567	Body	Gene Body	16919239	-4859	ESPNP	284729	pseudo
chr1	16980757	16981032	0#	3#[CTTCCTCA:195:0.9757128198920624] [CTTCCACA:184:0.8565942509560106] [GTTCCTCC:241:0.8529395658181256]	0#	277	79	37	429.51	56.32	0.03	-	NR_002729	UE	Upstream Enhancer	16963562	17274	MST1P9	11223	pseudo
chr1	17103789	17104428	0#	3#[CTTCCCCC:154:0.874687652128954] [GGCGGAAG:206:0.8620675461948546] [GGCGGAAG:475:0.8620675461948546]	1#[TGACCG:433:0.8490319803691448]	641	242	92	265.23	8.35	0.04	+	NM_014675	UE	Upstream Enhancer	17121031	-17000	CROCC	9696	protein-coding
chr1	17111091	17111772	0#	2#[AGAGGAAG:418:1.0] [AGAGGAAA:249:0.8910059604551641]	5#[AGGTCA:605:1.0] [GGGTCA:182:0.8857896050338628] [GGGTCA:663:0.8857896050338628] [TGACCG:29:0.8490319803691448] [CGGTCA:40:0.8490319803691448]	683	458	45	257.68	28.39	0.04	+	NM_014675	UE	Upstream Enhancer	17121031	-9482	CROCC	9696	protein-coding
chr1	17114746	17115052	1#[GAAGGGGGAAGTG:137:0.8626637250013407]	0#	1#[AGGTCA:300:1.0]	308	147	61	668.2	74.42	0	+	NM_014675	UE	Upstream Enhancer	17121031	-6138	CROCC	9696	protein-coding
chr1	17208726	17209116	0#	3#[CTTCCTCA:132:0.9757128198920624] [GGAGGAAG:221:0.9250330832242935] [AGAGGAAA:195:0.8910059604551641]	0#	392	230	31	137.82	18.23	0.04	-	NM_022089	Body	Gene Body	17211010	-2054	ATP13A2	23400	protein-coding
chr1	17212912	17213490	0#	2#[AGAGGAAG:152:1.0] [TGGGGAAG:217:0.925367388796723]	1#[TGGTCA:239:0.8180826906887997]	580	221	138	1388.98	102.29	0	-	NM_022089	UE	Upstream Enhancer	17211010	2123	ATP13A2	23400	protein-coding
chr1	17245306	17245448	0#	2#[GGAGGAAG:64:0.9250330832242935] [AGAGGAAA:74:0.8910059604551641]	0#	144	72	14	130.26	18.09	0.06	-	NM_003000	Body	Gene Body	17253252	-7874	SDHB	6390	protein-coding
chr1	17265586	17266287	0#	4#[CTTCCCCT:260:0.9496545689046608] [TGGGGAAG:494:0.925367388796723] [CTTCCCCC:680:0.874687652128954] [TGGGGAAC:7:0.8532738713905553]	1#[TGACCT:59:1.0]	703	214	39	114.74	7.43	0.1	-	NM_007365	Body	Gene Body	17318535	-52735	PADI2	11240	protein-coding
chr1	17274414	17274975	0#	4#[GTTCCTCT:255:0.9279064825938323] [CTTCCTCC:230:0.9250330832242935] [GGAGGAAG:501:0.9250330832242935] [TCAGGAAG:448:0.8653647538446115]	1#[TGGTCA:469:0.8180826906887997]	563	245	54	252.49	22.55	0.03	-	NM_007365	Body	Gene Body	17318535	-43876	PADI2	11240	protein-coding
chr1	17289687	17290246	0#	1#[GTTCCTCT:164:0.9279064825938323]	3#[AGGTCA:328:1.0] [AGGTCA:490:1.0] [TGACCC:32:0.8857896050338628]	561	155	41	266.45	36.34	0.04	-	NM_007365	Body	Gene Body	17318535	-28693	PADI2	11240	protein-coding
chr1	17297022	17297539	0#	2#[AGAGGAAG:323:1.0] [TGAGGAAA:120:0.8667187803472263]	4#[TGACCT:245:1.0] [AGGTCA:312:1.0] [TGACCA:91:0.8180826906887997] [TGACCA:149:0.8180826906887997]	519	159	35	130.97	12.82	0.06	-	NM_007365	Body	Gene Body	17318535	-21354	PADI2	11240	protein-coding
chr1	17318786	17319791	0#	5#[TGAGGAAG:697:0.9757128198920622] [CTTCCCCT:644:0.9496545689046608] [TGGGGAAG:987:0.925367388796723] [TGGGGAAC:239:0.8532738713905553] [ACGGGAAG:222:0.83930650285721]	3#[AGGTCA:562:1.0] [GGGTCA:354:0.8857896050338628] [TGACCC:421:0.8857896050338628]	1007	701	127	867.67	41.96	0	-	NM_007365	PP	Proximal Promoter	17318535	952	PADI2	11240	protein-coding
chr1	17320326	17320941	0#	0#	1#[GGGTCA:251:0.8857896050338628]	617	506	47	205.69	19.93	0.03	-	NM_007365	UE	Upstream Enhancer	17318535	2297	PADI2	11240	protein-coding
chr1	17322378	17322882	1#[GAATGAGGAAGTC:249:0.8163418403798642]	2#[TTTCCCCT:85:0.8406605293598248] [CGGGGAAG:202:0.8336868838942818]	0#	506	258	78	549.28	53.16	0	-	NM_007365	UE	Upstream Enhancer	17318535	4101	PADI2	11240	protein-coding
chr1	17360414	17360758	0#	1#[CTTCCTCT:131:1.0000000000000002]	2#[TGGTCA:159:0.8180826906887997] [TGGTCA:167:0.8180826906887997]	346	128	25	140.33	22.09	0.04	-	NM_007365	UE	Upstream Enhancer	17318535	42007	PADI2	11240	protein-coding
chr1	17380707	17381192	0#	1#[CTTCCTGT:465:0.8896519339525494]	0#	487	223	26	125.39	15.5	0.07	+	NM_013358	UE	Upstream Enhancer	17404207	-23277	PADI1	29943	protein-coding
chr1	17473374	17473602	0#	0#	1#[GGGTCA:186:0.8857896050338628]	230	132	23	135.89	16.94	0.05	+	NM_016233	Body	Gene Body	17448179	25327	PADI3	51702	protein-coding
chr1	17475689	17476158	0#	0#	0#	471	227	51	251.72	23.28	0.03	+	NM_016233	Body	Gene Body	17448179	27737	PADI3	51702	protein-coding
chr1	17480760	17481414	0#	5#[CTTCCTCT:372:1.0000000000000002] [AGAGGAAC:219:0.9279064825938323] [CTTCCTGT:432:0.8896519339525494] [GGCGGAAG:52:0.8620675461948546] [TGGGGAAC:327:0.8532738713905553]	2#[TGACCT:2:1.0] [AGGTCA:249:1.0]	656	399	75	574.35	38.76	0	+	NM_016233	Body	Gene Body	17448179	32980	PADI3	51702	protein-coding
chr1	17495100	17495579	0#	1#[AGAGGAAG:316:1.0]	2#[AGGTCA:133:1.0] [TGACCC:464:0.8857896050338628]	481	349	22	153.99	30.33	0.03	+	NM_012387	UE	Upstream Enhancer	17507276	-11827	PADI4	23569	protein-coding
chr1	17503335	17503665	0#	2#[CTTCCTCT:187:1.0000000000000002] [CTTCCTCC:242:0.9250330832242935]	1#[TGACCC:39:0.8857896050338628]	332	199	24	145.13	20.59	0.04	+	NM_012387	UE	Upstream Enhancer	17507276	-3742	PADI4	23569	protein-coding
chr1	17597420	17597744	0#	1#[CTTCCCCA:152:0.925367388796723]	0#	326	176	40	239.09	21.23	0.03	+	NM_207421	Body	Gene Body	17571327	26269	PADI6	353238	protein-coding
chr1	17630460	17631120	1#[AAAAGGGGAAGTG:425:0.9597713472075948]	0#	3#[AGGTCA:75:1.0] [CGGTCA:507:0.8490319803691448] [TGGTCA:388:0.8180826906887997]	662	440	145	1563.42	141.8	0	-	NM_001136204	Body	Gene Body	17637646	-6746	RCC2	55920	protein-coding
chr1	17637481	17637947	0#	2#[CTTCCTCC:214:0.9250330832242935] [AGAGGAAA:276:0.8910059604551641]	0#	468	217	73	547.07	50.79	0	-	NM_001136204	PP	Proximal Promoter	17637646	52	RCC2	55920	protein-coding
chr1	17640774	17641114	1#[CACTTCCTCCTTC:184:0.9028923777937458]	1#[AGGGGAAG:276:0.9496545689046608]	0#	342	188	35	193.87	22.27	0.04	-	NM_001136204	UE	Upstream Enhancer	17637646	3316	RCC2	55920	protein-coding
chr1	17716112	17716372	1#[GACTTCCTCATTT:97:0.8325598287559037]	1#[AGGGGAAA:245:0.8406605293598248]	2#[TGACCT:188:1.0] [TGGTCA:141:0.8180826906887997]	262	85	22	211.69	43.52	0.04	+	NM_018125	UE	Upstream Enhancer	17738916	-22719	ARHGEF10L	55160	protein-coding
chr1	17814318	17814528	0#	1#[AGAGGAAG:189:1.0]	0#	212	127	17	133.3	23.26	0.05	+	NM_018125	Body	Gene Body	17738916	75529	ARHGEF10L	55160	protein-coding
chr1	17857873	17858390	1#[GGAAGAGGAAGTG:220:0.8333154263803634]	1#[AGAGGAAG:194:1.0]	2#[TGACCC:243:0.8857896050338628] [TGGTCA:418:0.8180826906887997]	519	240	70	528.66	50.74	0	+	NM_018125	Body	Gene Body	17738916	119197	ARHGEF10L	55160	protein-coding
chr1	18060589	18061019	0#	1#[CTTCCTGA:186:0.8653647538446115]	0#	432	215	35	289.29	52.33	0.04	+	NM_030812	DE	DownStream Enhancer	17954394	106410	ACTL8	81569	protein-coding
chr1	18850904	18851127	1#[GAAAGGGGAAGTG:111:0.9435533588315553]	0#	1#[AGGTCA:174:1.0]	225	123	21	212.67	43.52	0.04	+	NM_002584	Body	Gene Body	18830086	20941	PAX7	5081	protein-coding
chr1	18915214	18915859	1#[CACTTCCTCTTTT:421:1.0]	1#[CTTCCCCC:622:0.874687652128954]	0#	647	423	45	333.76	34.88	0.02	+	NM_002584	Body	Gene Body	18830086	85551	PAX7	5081	protein-coding
chr1	19098406	19098883	1#[AAAACAGGAAGTC:216:0.8162075240398106]	0#	0#	479	229	34	234.74	36.64	0.03	-	NM_170726	Body	Gene Body	19101880	-3245	ALDH4A1	8659	protein-coding
chr1	19140981	19141373	0#	1#[AGAGGAAG:139:1.0]	2#[TGACCT:102:1.0] [TGACCC:272:0.8857896050338628]	394	150	29	159.91	20.08	0.03	-	NM_001136265	Body	Gene Body	19155413	-14282	IFFO2	126917	protein-coding
chr1	19280556	19281119	0#	1#[CTTCCTCT:255:1.0000000000000002]	0#	565	253	80	428.77	29.86	0.03	-	NM_020765	Body	Gene Body	19409333	-128524	UBR4	23352	protein-coding
chr1	19514224	19515056	0#	4#[AGAGGAAG:517:1.0] [CTTCCGCA:749:0.9127472828626235] [TGAGGAAA:486:0.8667187803472263] [CTTCCTGA:326:0.8653647538446115]	1#[TGACCT:251:1.0]	834	526	140	910.35	46.51	0	+	NM_001040126	Body	Gene Body	19511326	3424	PQLC2	54896	protein-coding
chr1	19546830	19547310	1#[AAATGGGGAACTG:222:0.8156677311465419]	0#	0#	482	243	54	436.72	49.42	0.03	-	NR_038125	Body	Gene Body	19683788	-136715	CAPZB	832	protein-coding
chr1	19610622	19611158	1#[CACTTCCTCTTTC:246:0.9837820116239607]	1#[TGAGGAAC:142:0.9036193024858946]	2#[GGGTCA:368:0.8857896050338628] [TGGTCA:217:0.8180826906887997]	538	249	44	328.49	48.17	0.02	-	NR_038125	Body	Gene Body	19683788	-72917	CAPZB	832	protein-coding
chr1	19668482	19668821	0#	2#[TGAGGAAG:133:0.9757128198920622] [TGAGGAAA:0:0.8667187803472263]	1#[TGACCG:242:0.8490319803691448]	341	153	120	1264.71	72.26	0	-	NR_038125	Body	Gene Body	19683788	-15153	CAPZB	832	protein-coding
chr1	19675925	19676734	0#	5#[AGAGGAAC:569:0.9279064825938323] [GTTCCTCA:615:0.9036193024858946] [AGGGGAAC:0:0.8775610514984932] [TTTCCTCA:21:0.8667187803472263] [TGAGGAAA:203:0.8667187803472263]	1#[GGGTCA:742:0.8857896050338628]	811	621	56	181.55	13	0.04	-	NR_038125	Body	Gene Body	19683788	-7242	CAPZB	832	protein-coding
chr1	19676967	19677843	0#	5#[AGAGGAAG:145:1.0] [CTTCCCCA:736:0.925367388796723] [GGAGGAAG:679:0.9250330832242935] [CTTCCTCC:804:0.9250330832242935] [AGAAGAAG:352:0.839218783233912]	1#[TGACCA:671:0.8180826906887997]	878	160	85	322.19	19.85	0.02	-	NR_038125	Body	Gene Body	19683788	-6661	CAPZB	832	protein-coding
chr1	19704705	19705272	0#	1#[CTTCCTCT:371:1.0000000000000002]	2#[TGACCT:137:1.0] [TGACCC:358:0.8857896050338628]	569	359	62	375.89	22.36	0.03	-	NR_038125	UE	Upstream Enhancer	19683788	21276	CAPZB	832	protein-coding
chr1	19537492	19537878	0#	0#	0#	388	190	22	123.87	15.99	0.07	-	NM_001206540	DE	DownStream Enhancer	19684653	-146971	CAPZB	832	protein-coding
chr1	19795746	19796352	0#	4#[GGAGGAAG:512:0.9250330832242935] [AGAGGAAA:351:0.8910059604551641] [CTTCCTGA:283:0.8653647538446115] [TGGGGAAC:373:0.8532738713905553]	5#[AGGTCA:168:1.0] [TGACCT:288:1.0] [AGGTCA:538:1.0] [GGGTCA:174:0.8857896050338628] [TGGTCA:104:0.8180826906887997]	608	250	64	193.81	9.56	0.04	+	NM_001204089	PP	Proximal Promoter	19796057	-61	C1orf151-NBL1	100532736	protein-coding
chr1	19825301	19826264	1#[AAAAGAGGAAGTC:400:0.8913317838010807]	1#[AGGGGAAG:756:0.9496545689046608]	1#[TGACCT:90:1.0]	965	429	76	543.07	49.83	0	+	NM_001204089	Body	Gene Body	19796057	29673	C1orf151-NBL1	100532736	protein-coding
chr1	19855306	19855540	0#	1#[TGAGGAAG:109:0.9757128198920622]	0#	236	101	20	142.87	22.15	0.04	+	NM_001204089	Body	Gene Body	19796057	59350	C1orf151-NBL1	100532736	protein-coding
chr1	19998308	19998714	0#	3#[CTTCCTCT:243:1.0000000000000002] [AGGGGAAG:202:0.9496545689046608] [CTTCCTGA:166:0.8653647538446115]	4#[TGACCT:225:1.0] [TGACCT:252:1.0] [TGACCT:294:1.0] [TGACCA:258:0.8180826906887997]	408	225	27	140.92	27.91	0.04	-	NM_181719	PP	Proximal Promoter	19998997	-464	TMCO4	255104	protein-coding
chr1	20058044	20058220	0#	0#	0#	178	84	29	371.16	71.68	0.03	+	NM_015207	UE	Upstream Enhancer	20081474	-23346	OTUD3	23252	protein-coding
chr1	20260968	20261359	0#	3#[GTTCCTCT:151:0.9279064825938323] [CTTCCACT:192:0.8808814310639483] [CTTCCTGA:209:0.8653647538446115]	1#[TGACCT:123:1.0]	393	143	25	126.2	21.71	0.07	+	NM_000929	UE	Upstream Enhancer	20269287	-8176	PLA2G5	5322	protein-coding
chr1	20364589	20365191	0#	2#[CTTCCTCT:353:1.0000000000000002] [CTTCCTCA:458:0.9757128198920624]	2#[TGACCT:434:1.0] [GGGTCA:538:0.8857896050338628]	604	354	70	305.4	14.4	0.02	-	NM_001105572	Body	Gene Body	20374274	-9331	PLA2G2C	391013	protein-coding
chr1	20370336	20370891	0#	4#[AGAGGAAC:383:0.9279064825938323] [TCAGGAAG:53:0.8653647538446115] [TGGGGAAC:77:0.8532738713905553] [CTTCTTCT:496:0.8392187832339122]	1#[TGACCT:366:1.0]	557	461	65	384.05	24.29	0.03	-	NM_001105572	Body	Gene Body	20374274	-3477	PLA2G2C	391013	protein-coding
chr1	20373989	20374510	0#	2#[CTTCCCCC:510:0.874687652128954] [AGAAGAAG:165:0.839218783233912]	1#[TGACCC:195:0.8857896050338628]	523	288	39	161.64	17.83	0.03	-	NM_001105572	PP	Proximal Promoter	20374274	3	PLA2G2C	391013	protein-coding
chr1	20378081	20378635	0#	2#[CTTCCCCT:189:0.9496545689046608] [GTTCCTCT:317:0.9279064825938323]	1#[AGGTCA:420:1.0]	556	203	39	194.59	18.52	0.04	-	NM_001105572	UE	Upstream Enhancer	20374274	4010	PLA2G2C	391013	protein-coding
chr1	20383525	20383969	0#	1#[TGAGGAAG:272:0.9757128198920622]	2#[GGGTCA:96:0.8857896050338628] [TGACCA:23:0.8180826906887997]	446	117	43	241.9	16.99	0.03	+	NM_152376	PP	Proximal Promoter	20385164	-1522	UBXN10	127733	protein-coding
chr1	20384455	20384826	0#	2#[AGCGGAAG:100:0.9370344629705611] [AGTGGAAG:125:0.8808814310639483]	1#[AGGTCA:221:1.0]	373	105	29	158.11	16.75	0.03	+	NM_152376	PP	Proximal Promoter	20385164	-604	UBXN10	127733	protein-coding
chr1	20580088	20580546	1#[CACTTCCCCTTTC:229:0.9435533588315557]	3#[TGAGGAAA:15:0.8667187803472263] [TGAGGAAA:204:0.8667187803472263] [AGAAGAAG:137:0.839218783233912]	0#	460	225	31	198.14	27.62	0.04	-	NR_033887	Body	Gene Body	20627874	-47561	LOC339505	339505	miscRNA
chr1	20692789	20693704	1#[AAATGAGGAAATG:315:0.818465308360904]	4#[AGGGGAAG:824:0.9496545689046608] [TGGGGAAG:171:0.925367388796723] [TGGGGAAG:302:0.925367388796723] [GTTCCCCA:158:0.8532738713905553]	1#[TGGTCA:438:0.8180826906887997]	917	317	100	444.24	30.6	0.03	-	NM_018584	UE	Upstream Enhancer	20685315	7791	CAMK2N1	55450	protein-coding
chr1	20754720	20755198	1#[AAAAACGGAAGTG:262:0.8452811511953582]	0#	0#	480	277	48	281.27	26.98	0.04	+	NM_207334	DE	DownStream Enhancer	20751518	3479	FAM43B	163933	protein-coding
chr1	20774280	20775102	0#	3#[TGGGGAAG:650:0.925367388796723] [GGAGGAAG:274:0.9250330832242935] [GTTCCTCA:551:0.9036193024858946]	1#[TGACCC:705:0.8857896050338628]	824	293	85	443.32	31.01	0.03	+	NM_001785	UE	Upstream Enhancer	20788030	-13457	CDA	978	protein-coding
chr1	20803679	20804157	0#	1#[ACAGGAAG:279:0.8896519339525494]	1#[TGACCT:22:1.0]	480	281	52	345.9	33.83	0.03	+	NM_001785	Body	Gene Body	20788030	15930	CDA	978	protein-coding
chr1	20860701	20861182	0#	0#	2#[GGGTCA:252:0.8857896050338628] [TGACCG:114:0.8490319803691448]	483	82	41	194.07	21.66	0.04	-	NM_005216	PP	Proximal Promoter	20860624	159	DDOST	1650	protein-coding
chr1	20884120	20884771	0#	6#[CTTCCTCT:199:1.0000000000000002] [CTTCCTCT:595:1.0000000000000002] [CTTCCTCT:625:1.0000000000000002] [GGAGGAAG:183:0.9250330832242935] [CTTCCCCC:453:0.874687652128954] [CTTCCCGT:297:0.83930650285721]	0#	653	309	35	133.61	12.6	0.05	-	NM_020816	Body	Gene Body	20916904	-32475	KIF17	57576	protein-coding
chr1	20891066	20891448	0#	3#[CTTCCTCT:343:1.0000000000000002] [CTTCCTCC:206:0.9250330832242935] [TTTCCTCT:364:0.8910059604551641]	2#[TGACCT:126:1.0] [TGACCA:296:0.8180826906887997]	384	215	21	117.97	22.33	0.08	-	NM_020816	Body	Gene Body	20916904	-25623	KIF17	57576	protein-coding
chr1	21163944	21164385	1#[CACTTCCTCATTA:218:0.8939216197606191]	2#[TGGGGAAG:27:0.925367388796723] [CTTCCCCA:408:0.925367388796723]	2#[TGGTCA:270:0.8180826906887997] [TGACCA:364:0.8180826906887997]	443	230	36	220.27	23.26	0.04	-	NM_003760	Body	Gene Body	21310463	-146289	EIF4G3	8672	protein-coding
chr1	21316660	21317076	0#	0#	1#[TGGTCA:119:0.8180826906887997]	418	232	36	278.56	45.36	0.04	-	NM_001198803	Body	Gene Body	21373838	-56946	EIF4G3	8672	protein-coding
chr1	21374430	21374776	0#	2#[CTTCCTCT:151:1.0000000000000002] [AGAGGAAC:265:0.9279064825938323]	1#[AGGTCA:169:1.0]	348	174	25	175.69	31.56	0.04	-	NM_001198803	PP	Proximal Promoter	21373838	766	EIF4G3	8672	protein-coding
chr1	21375976	21376601	0#	3#[CTTCCTCA:486:0.9757128198920624] [AGAGGAAA:538:0.8910059604551641] [CTTCCTCG:156:0.8840323149896212]	1#[AGGTCA:559:1.0]	627	486	43	188.31	22.78	0.04	-	NM_001198801	PP	Proximal Promoter	21375968	494	EIF4G3	8672	protein-coding
chr1	21432495	21432945	0#	2#[ACAGGAAG:306:0.8896519339525494] [AGAAGAAG:254:0.839218783233912]	2#[TGACCC:180:0.8857896050338628] [GGGTCA:382:0.8857896050338628]	452	285	33	176.57	21.02	0.04	-	NM_001113347	Body	Gene Body	21478770	-45990	ECE1	1889	protein-coding
chr1	21438241	21438613	0#	1#[AGAGGAAG:211:1.0]	1#[TGACCA:167:0.8180826906887997]	374	217	29	239.76	42.64	0.03	-	NM_001113347	Body	Gene Body	21478770	-40312	ECE1	1889	protein-coding
chr1	21478944	21479784	0#	5#[CTTCCTCT:675:1.0000000000000002] [AGAGGAAG:224:1.0] [AGGGGAAG:757:0.9496545689046608] [ACAGGAAG:204:0.8896519339525494] [ACAGGAAG:381:0.8896519339525494]	2#[TGACCT:795:1.0] [GGGTCA:567:0.8857896050338628]	842	231	117	654.88	45.87	0	-	NM_001113347	PP	Proximal Promoter	21478770	405	ECE1	1889	protein-coding
chr1	21489720	21490225	1#[CAGTTCCCCTTTC:229:0.85822169781568]	2#[CTTCCCCC:461:0.874687652128954] [TCAGGAAG:93:0.8653647538446115]	2#[TGACCC:22:0.8857896050338628] [TGGTCA:361:0.8180826906887997]	507	251	38	170.67	18.53	0.03	-	NM_001113349	PP	Proximal Promoter	21489353	618	ECE1	1889	protein-coding
chr1	21493421	21493976	0#	1#[AGAGGAAG:191:1.0]	1#[TGACCC:347:0.8857896050338628]	557	174	51	191.16	14.72	0.04	+	NR_038404	Body	Gene Body	21492369	1226	LOC100506801	100506801	miscRNA
chr1	21524227	21524684	0#	2#[GTTCCTCA:243:0.9036193024858946] [GTTCCCCT:172:0.8775610514984932]	0#	459	225	36	126.55	12.24	0.07	-	NM_001113348	Body	Gene Body	21544621	-20169	ECE1	1889	protein-coding
chr1	21530983	21531488	0#	1#[CTTCCCCT:273:0.9496545689046608]	1#[TGGTCA:97:0.8180826906887997]	507	273	50	184.31	15.54	0.04	-	NM_001113348	Body	Gene Body	21544621	-13365	ECE1	1889	protein-coding
chr1	21533152	21533987	0#	2#[TGAGGAAG:156:0.9757128198920622] [TGCGGAAG:478:0.9127472828626235]	2#[TGACCT:174:1.0] [TGGTCA:561:0.8180826906887997]	837	448	103	379.05	15.48	0.03	-	NM_001113348	Body	Gene Body	21544621	-11021	ECE1	1889	protein-coding
chr1	21536877	21537227	0#	2#[CTTCCCCT:248:0.9496545689046608] [TGAGGAAA:230:0.8667187803472263]	0#	352	202	24	118.04	14.33	0.08	-	NM_001113348	Body	Gene Body	21544621	-7542	ECE1	1889	protein-coding
chr1	21537388	21537815	0#	2#[AGAGGAAG:144:1.0] [TGAGGAAG:198:0.9757128198920622]	1#[TGACCA:44:0.8180826906887997]	429	212	30	158.4	22.2	0.03	-	NM_001113348	Body	Gene Body	21544621	-7021	ECE1	1889	protein-coding
chr1	21815428	21815880	1#[CACTTCCCCATTT:210:0.900999392162418]	0#	1#[AGGTCA:140:1.0]	454	211	51	312.81	34.88	0.02	-	NM_001145658	Body	Gene Body	21850935	-35296	RAP1GAP	5909	protein-coding
chr1	21858286	21858743	0#	1#[CTTCCTCA:213:0.9757128198920624]	0#	459	207	41	300.47	47.97	0.04	-	NM_001145657	Body	Gene Body	21868443	-9950	RAP1GAP	5909	protein-coding
chr1	21885055	21885391	1#[GACTTCCTCTTTT:169:0.891331783801081]	1#[AGAGGAAA:296:0.8910059604551641]	0#	338	169	48	496.48	74.34	0	-	NM_032236	Body	Gene Body	21982275	-97051	USP48	84196	protein-coding
chr1	22014723	22015450	1#[GAAAGCGGAAGTG:535:0.902366468372511]	2#[AGAGGAAG:105:1.0] [CTTCCGCT:316:0.9370344629705614]	4#[AGGTCA:430:1.0] [TGACCC:361:0.8857896050338628] [TGACCA:397:0.8180826906887997] [TGGTCA:410:0.8180826906887997]	729	126	130	1026.64	52.77	0	+	NM_001013693	Body	Gene Body	22011344	3505	LDLRAD2	401944	protein-coding
chr1	22022733	22023189	0#	1#[CTTCCTCA:236:0.9757128198920624]	2#[GGGTCA:80:0.8857896050338628] [TGACCA:20:0.8180826906887997]	458	238	42	216.35	21.59	0.04	+	NM_001013693	Body	Gene Body	22011344	11627	LDLRAD2	401944	protein-coding
chr1	22051186	22051789	0#	3#[AGAGGAAG:368:1.0] [TGAGGAAG:329:0.9757128198920622] [ACGGGAAG:426:0.83930650285721]	1#[TGACCT:23:1.0]	605	375	37	205.75	28.39	0.03	-	NM_005529	Body	Gene Body	22136337	-84776	HSPG2	3339	protein-coding
chr1	22056086	22056828	0#	3#[CTTCCTCC:247:0.9250330832242935] [TGGGGAAC:589:0.8532738713905553] [ACGGGAAG:388:0.83930650285721]	3#[TGACCT:267:1.0] [GGGTCA:210:0.8857896050338628] [TGGTCA:105:0.8180826906887997]	744	470	68	263.01	14.69	0.04	-	NM_005529	Body	Gene Body	22136337	-79781	HSPG2	3339	protein-coding
chr1	22108835	22109671	0#	5#[CTTCCTGA:516:0.8653647538446115] [CTTCCACA:282:0.8565942509560106] [TGGGGAAC:484:0.8532738713905553] [GTTCCCCA:564:0.8532738713905553] [GTTCCTCC:392:0.8529395658181256]	0#	838	321	92	308.8	20.13	0.02	-	NM_005529	Body	Gene Body	22136337	-27181	HSPG2	3339	protein-coding
chr1	22123430	22124117	0#	4#[CTTCCTCT:360:1.0000000000000002] [AGGGGAAG:30:0.9496545689046608] [CTTCCCCT:589:0.9496545689046608] [TTTCCTCT:540:0.8910059604551641]	2#[TGACCA:279:0.8180826906887997] [TGACCA:323:0.8180826906887997]	689	359	117	699.39	38.95	0	-	NM_005529	Body	Gene Body	22136337	-12548	HSPG2	3339	protein-coding
chr1	22218118	22218618	0#	4#[GGAGGAAG:142:0.9250330832242935] [CTTCCTCC:263:0.9250330832242935] [CTTCCGCA:112:0.9127472828626235] [TCAGGAAG:278:0.8653647538446115]	2#[TGACCT:4:1.0] [TGACCC:417:0.8857896050338628]	502	246	171	1674.99	54.72	0	+	NR_023918	UE	Upstream Enhancer	22224293	-5929	LINC00339	29092	miscRNA
chr1	22238773	22239313	0#	2#[CTTCCTCT:339:1.0000000000000002] [AGAAGAAG:82:0.839218783233912]	2#[TGACCT:166:1.0] [TGACCA:25:0.8180826906887997]	542	352	66	362.4	26.61	0.03	+	NM_001039802	UE	Upstream Enhancer	22251706	-12581	CDC42	998	protein-coding
chr1	22251450	22251979	0#	3#[AGAGGAAG:69:1.0] [CTTCCCCT:235:0.9496545689046608] [GTTCCTCC:248:0.8529395658181256]	1#[TGACCC:219:0.8857896050338628]	531	236	88	543.88	32.72	0	+	NM_001039802	PP	Proximal Promoter	22251706	-20	CDC42	998	protein-coding
chr1	22274771	22275198	0#	5#[CTTCCTCT:332:1.0000000000000002] [AGGGGAAG:232:0.9496545689046608] [TTTCCTCT:353:0.8910059604551641] [AGTGGAAG:206:0.8808814310639483] [AGGGGAAA:50:0.8406605293598248]	0#	429	198	24	118.04	17.46	0.08	+	NM_001039802	Body	Gene Body	22251706	23263	CDC42	998	protein-coding
chr1	22367715	22367986	0#	1#[CTTCCTCT:112:1.0000000000000002]	0#	273	142	41	218.63	16.4	0.04	-	NM_030761	UE	Upstream Enhancer	22342106	25751	WNT4	54361	protein-coding
chr1	22631025	22631417	0#	1#[AGAGGAAG:207:1.0]	0#	394	221	33	222.68	32.3	0.03	+	NM_001083621	UE	Upstream Enhancer	22650930	-19684	ZBTB40	9923	protein-coding
chr1	22661280	22661495	1#[CACTTCCTCATTT:140:0.9412280449548228]	0#	2#[AGGTCA:115:1.0] [TGGTCA:34:0.8180826906887997]	217	131	16	133.68	26.06	0.05	+	NM_001083621	Body	Gene Body	22650930	10481	ZBTB40	9923	protein-coding
chr1	22774904	22775398	0#	3#[CTTCCTCA:176:0.9757128198920624] [CTTCCCCT:206:0.9496545689046608] [CTTCCCCA:22:0.925367388796723]	3#[TGACCT:139:1.0] [AGGTCA:161:1.0] [GGGTCA:327:0.8857896050338628]	496	165	32	145.38	14.42	0.04	+	NM_020526	Body	Gene Body	22762590	12479	EPHA8	2046	protein-coding
chr1	22815012	22815423	1#[GAGAGAGGAAGTG:181:0.8159749523179656]	1#[AGAGGAAC:66:0.9279064825938323]	2#[AGGTCA:0:1.0] [AGGTCA:203:1.0]	413	197	24	109.81	18.65	0.1	+	NM_015991	UE	Upstream Enhancer	22835704	-20495	C1QA	712	protein-coding
chr1	22835457	22835807	0#	2#[AGGGGAAG:206:0.9496545689046608] [TGGGGAAG:177:0.925367388796723]	0#	352	221	25	126.2	17.4	0.07	+	NM_015991	PP	Proximal Promoter	22835704	-26	C1QA	712	protein-coding
chr1	22842330	22842783	1#[CAGTTCCTCATTT:189:0.8558963839389472]	2#[AGGGGAAG:409:0.9496545689046608] [CTTCCTCC:13:0.9250330832242935]	3#[TGGTCA:68:0.8180826906887997] [TGGTCA:246:0.8180826906887997] [TGACCA:374:0.8180826906887997]	455	211	39	244.72	27.91	0.03	+	NM_172369	PP	Proximal Promoter	22842704	-163	C1QC	714	protein-coding
chr1	22851525	22852008	0#	3#[AGGGGAAG:183:0.9496545689046608] [CTTCCTCC:256:0.9250330832242935] [TGAGGAAC:472:0.9036193024858946]	0#	485	247	30	207.89	30.41	0.04	+	NM_000491	PP	Proximal Promoter	22852268	-496	C1QB	713	protein-coding
chr1	22901680	22902354	0#	2#[CTTCCTCT:250:1.0000000000000002] [GGAGGAAG:444:0.9250330832242935]	0#	676	253	66	536.8	54.82	0	+	NM_017449	UE	Upstream Enhancer	22909917	-7984	EPHB2	2048	protein-coding
chr1	22945197	22945716	0#	3#[GGAGGAAG:175:0.9250330832242935] [ACAGGAAG:423:0.8896519339525494] [TGGGGAAC:255:0.8532738713905553]	2#[TGACCT:219:1.0] [TGGTCA:301:0.8180826906887997]	521	414	23	119.51	15.17	0.08	+	NM_017449	Body	Gene Body	22909917	35694	EPHB2	2048	protein-coding
chr1	23212570	23213043	0#	1#[AGAGGAAG:243:1.0]	1#[TGACCA:431:0.8180826906887997]	475	219	30	243.98	46.51	0.03	-	NM_001242521	Body	Gene Body	23214930	-2141	LOC729059	729059	protein-coding
chr1	23218222	23218523	0#	0#	1#[TGGTCA:109:0.8180826906887997]	303	145	23	126.3	13.74	0.07	+	NM_015013	PP	Proximal Promoter	23218527	-160	KDM1A	23028	protein-coding
chr1	23302395	23302889	0#	1#[CTTCCTCC:249:0.9250330832242935]	1#[AGGTCA:392:1.0]	496	247	40	257.5	31.01	0.04	-	NM_001142546	Body	Gene Body	23367938	-65296	LUZP1	7798	protein-coding
chr1	23314529	23314700	1#[TACTTCCTCTTTT:91:0.8613376114672322]	0#	0#	173	87	21	152.57	20.12	0.03	-	NM_001142546	Body	Gene Body	23367938	-53322	LUZP1	7798	protein-coding
chr1	23348176	23348533	0#	2#[AGAGGAAG:147:1.0] [ACAGGAAG:160:0.8896519339525494]	2#[GGGTCA:343:0.8857896050338628] [TGACCA:104:0.8180826906887997]	359	172	21	117.97	22.26	0.08	-	NM_001142546	Body	Gene Body	23367938	-19590	LUZP1	7798	protein-coding
chr1	23367264	23367442	0#	2#[CTTCCTCC:95:0.9250330832242935] [CTTCCTGT:76:0.8896519339525494]	0#	180	81	18	174.97	33.49	0.04	-	NM_001142546	PP	Proximal Promoter	23367938	-593	LUZP1	7798	protein-coding
chr1	23368755	23369293	0#	3#[CTTCCTCT:180:1.0000000000000002] [CTTCCCCT:390:0.9496545689046608] [GGAGGAAG:37:0.9250330832242935]	2#[TGACCT:512:1.0] [TGACCC:372:0.8857896050338628]	540	167	98	642.82	35.79	0	-	NM_001142546	PP	Proximal Promoter	23367938	984	LUZP1	7798	protein-coding
chr1	23553411	23553702	0#	2#[CTTCCTCT:216:1.0000000000000002] [CTTCCTCA:27:0.9757128198920624]	1#[TGACCA:210:0.8180826906887997]	293	219	17	134.23	27.91	0.05	-	NM_001102397	UE	Upstream Enhancer	23543440	10190	HNRNPR	10236	protein-coding
chr1	23580299	23580669	0#	3#[CTTCCTCT:110:1.0000000000000002] [CTTCCTCT:202:1.0000000000000002] [CTTCCTCA:215:0.9757128198920624]	1#[TGACCG:82:0.8490319803691448]	372	229	27	208.44	37.45	0.04	-	NM_003196	Body	Gene Body	23623848	-43320	TCEA3	6920	protein-coding
chr1	23583278	23583852	1#[CACTTCCGCTTTT:456:0.9185844567485505]	1#[TTTCCTCT:387:0.8910059604551641]	0#	576	439	62	466.79	51.68	0	-	NM_003196	Body	Gene Body	23623848	-40131	TCEA3	6920	protein-coding
chr1	23601449	23602400	0#	3#[AGAGGAAG:573:1.0] [CTTCCTCC:185:0.9250330832242935] [TGAGGAAC:508:0.9036193024858946]	2#[TGACCT:733:1.0] [TGACCA:516:0.8180826906887997]	953	564	70	215.7	9.79	0.04	-	NM_003196	Body	Gene Body	23623848	-21835	TCEA3	6920	protein-coding
chr1	23758600	23758995	0#	2#[TGAGGAAG:161:0.9757128198920622] [CTTCCTCC:109:0.9250330832242935]	1#[AGGTCA:340:1.0]	397	160	51	395.86	45.35	0.03	-	NM_002167	PP	Proximal Promoter	23758872	-112	ID3	3399	protein-coding
chr1	23766247	23766640	0#	1#[AGAGGAAG:262:1.0]	0#	395	310	30	148.4	13.42	0.04	-	NM_002167	UE	Upstream Enhancer	23758872	7685	ID3	3399	protein-coding
chr1	23793980	23794380	0#	2#[GTTCCTCA:272:0.9036193024858946] [CTTCCCGT:186:0.83930650285721]	0#	402	243	38	151.69	14.02	0.04	+	NR_027042	UE	Upstream Enhancer	23826410	-32187	MDS2	259283	miscRNA
chr1	23838442	23838817	0#	2#[TGGGGAAG:184:0.925367388796723] [CTTCCTCC:248:0.9250330832242935]	1#[TGGTCA:98:0.8180826906887997]	377	238	25	142.26	20.67	0.04	+	NR_027042	Body	Gene Body	23826410	12270	MDS2	259283	miscRNA
chr1	23926373	23926637	0#	1#[CTTCCTGA:24:0.8653647538446115]	0#	266	141	26	112.52	10.52	0.1	+	NM_003198	UE	Upstream Enhancer	23942442	-15928	TCEB3	6924	protein-coding
chr1	23942871	23943170	0#	1#[CTTCCTCC:51:0.9250330832242935]	0#	301	89	23	135.59	22.09	0.05	+	NM_003198	PP	Proximal Promoter	23942442	518	TCEB3	6924	protein-coding
chr1	23999747	24000251	1#[GAAGGCGGAAGTG:256:0.8214768345422963]	0#	1#[TGACCC:437:0.8857896050338628]	506	274	62	369.44	35.66	0.03	-	NM_001127621	PP	Proximal Promoter	23998647	1374	GALE	2582	protein-coding
chr1	24009838	24010333	0#	1#[TGAGGAAG:246:0.9757128198920622]	1#[AGGTCA:63:1.0]	497	241	67	388.16	26.68	0.03	-	NM_001166059	Body	Gene Body	24024536	-14457	HMGCL	3155	protein-coding
chr1	24068885	24069206	0#	1#[CTTCCTCA:218:0.9757128198920624]	0#	323	224	25	187.92	32.97	0.04	-	NM_000147	PP	Proximal Promoter	24067446	1663	FUCA1	2517	protein-coding
chr1	24107720	24108986	0#	4#[AGAGGAAC:225:0.9279064825938323] [ACAGGAAG:928:0.8896519339525494] [AGTGGAAG:366:0.8808814310639483] [GTTCCTCC:548:0.8529395658181256]	2#[AGGTCA:55:1.0] [TGACCT:1256:1.0]	1268	540	178	715.16	21.53	0	-	NM_001841	Body	Gene Body	24112404	-4144	CNR2	1269	protein-coding
chr1	24112301	24112836	0#	2#[CTTCCCCT:223:0.9496545689046608] [CTTCCCCA:378:0.925367388796723]	0#	537	227	79	625.66	51.68	0	-	NM_001841	PP	Proximal Promoter	24112404	124	CNR2	1269	protein-coding
chr1	24115220	24116288	0#	8#[TGAGGAAG:266:0.9757128198920622] [AGGGGAAG:605:0.9496545689046608] [AGGGGAAG:719:0.9496545689046608] [TGGGGAAG:22:0.925367388796723] [GGAGGAAG:1053:0.9250330832242935] [CTTCCTGT:229:0.8896519339525494] [AGTGGAAG:160:0.8808814310639483] [GGAGGAAC:910:0.8529395658181258]	2#[TGACCC:984:0.8857896050338628] [TGACCA:215:0.8180826906887997]	1070	291	83	405.55	17.44	0.03	-	NM_001841	UE	Upstream Enhancer	24112404	3107	CNR2	1269	protein-coding
chr1	24157989	24158537	1#[CAAGCAGGAAGTG:280:0.8020021046911652]	2#[CTTCCCCT:52:0.9496545689046608] [TTTCCCCT:0:0.8406605293598248]	0#	550	307	41	149.94	14.36	0.04	+	NM_017761	PP	Proximal Promoter	24158887	-591	PNRC2	55629	protein-coding
chr1	24179252	24179756	0#	2#[CTTCCCCC:222:0.874687652128954] [TCAGGAAG:450:0.8653647538446115]	0#	506	217	66	345.24	24.48	0.03	-	NM_001191006	PP	Proximal Promoter	24179540	-71	SRSF10	10772	protein-coding
chr1	24373130	24373641	1#[AAATGTGGAAGTG:326:0.8465073690037707]	2#[AGAGGAAG:61:1.0] [AGAGGAAT:471:0.840598909800833]	1#[TGACCT:182:1.0]	513	337	42	315.19	31.56	0.02	-	NM_173065	Body	Gene Body	24386352	-12885	IL28RA	163702	protein-coding
chr1	24389230	24389693	1#[CACTTCCTGATTT:210:0.8661037851935528]	1#[CTTCCTCT:286:1.0000000000000002]	2#[AGGTCA:68:1.0] [AGGTCA:452:1.0]	465	258	70	514.14	36.05	0	-	NM_173065	UE	Upstream Enhancer	24386352	3136	IL28RA	163702	protein-coding
chr1	24390037	24390583	0#	3#[CTTCCTCA:434:0.9757128198920624] [CTTCCGCT:377:0.9370344629705614] [GTTCCCCA:260:0.8532738713905553]	0#	548	305	29	122.58	11.63	0.07	-	NM_173065	UE	Upstream Enhancer	24386352	3990	IL28RA	163702	protein-coding
chr1	24571962	24572473	0#	3#[CTTCCTCA:253:0.9757128198920624] [CTTCCCCA:65:0.925367388796723] [AGGGGAAA:81:0.8406605293598248]	2#[AGGTCA:34:1.0] [TGGTCA:449:0.8180826906887997]	513	237	46	173.38	15.51	0.03	-	NM_178122	Body	Gene Body	24612849	-40650	STPG1	90529	protein-coding
chr1	24618357	24618801	0#	1#[TGAGGAAG:143:0.9757128198920622]	0#	446	182	36	155.59	13.34	0.03	+	NM_020448	Body	Gene Body	24614831	3708	NIPAL3	57185	protein-coding
chr1	24634928	24635148	1#[CACTTCCTCTCTC:121:0.8159749523179658]	0#	0#	222	140	16	149.02	38.4	0.04	+	NM_020448	Body	Gene Body	24614831	20237	NIPAL3	57185	protein-coding
chr1	24665671	24666191	0#	1#[CTTCCACT:224:0.8808814310639483]	1#[TGACCT:440:1.0]	522	222	36	182.99	22.2	0.04	+	NM_020448	Body	Gene Body	24614831	51062	NIPAL3	57185	protein-coding
chr1	24771253	24771834	0#	3#[AGAGGAAG:322:1.0] [CTTCCCCA:522:0.925367388796723] [CTTCCTGT:199:0.8896519339525494]	2#[TGACCT:212:1.0] [TGGTCA:239:0.8180826906887997]	583	333	73	500.64	38.76	0	+	NM_001010980	Body	Gene Body	24755153	16433	NCMAP	400746	protein-coding
chr1	24961338	24961954	1#[CAAAGAGGAACTG:289:0.8726843372667745]	3#[TGAGGAAC:232:0.9036193024858946] [AGAGGAAA:325:0.8910059604551641] [TGAGGAAA:206:0.8667187803472263]	1#[TGACCA:383:0.8180826906887997]	618	306	78	627.85	60.72	0	+	NM_013943	Body	Gene Body	24944346	17298	CLIC4	25932	protein-coding
chr1	25046981	25047805	0#	5#[CTTCCTCT:306:1.0000000000000002] [AGAGGAAG:602:1.0] [CTTCCTGT:372:0.8896519339525494] [GTTCCCCT:202:0.8775610514984932] [CTTCCCCC:695:0.874687652128954]	1#[AGGTCA:529:1.0]	826	282	145	1052.26	29.46	0	+	NM_013943	DE	DownStream Enhancer	24944346	102917	CLIC4	25932	protein-coding
chr1	25063506	25063905	0#	1#[TTTCCCCT:90:0.8406605293598248]	1#[TGACCT:147:1.0]	401	207	45	231.28	20.52	0.03	+	NM_013943	DE	DownStream Enhancer	24944346	119367	CLIC4	25932	protein-coding
chr1	25071409	25072120	0#	1#[TGTGGAAG:430:0.8565942509560106]	2#[TGACCA:371:0.8180826906887997] [TGACCA:402:0.8180826906887997]	713	387	150	878.15	30.4	0	-	NM_004350	DE	DownStream Enhancer	25129357	-57561	RUNX3	864	protein-coding
chr1	25097166	25097788	0#	3#[CTTCCCCA:16:0.925367388796723] [CTTCCTCC:227:0.9250330832242935] [TTTCCCCT:282:0.8406605293598248]	1#[TGACCC:434:0.8857896050338628]	624	230	93	570.54	40.36	0	-	NM_004350	DE	DownStream Enhancer	25129357	-31961	RUNX3	864	protein-coding
chr1	25396984	25397590	1#[GAATGAGGAAGTC:268:0.8163418403798642]	1#[TGGGGAAG:353:0.925367388796723]	0#	608	294	106	600.58	31.18	0	-	NM_015484	DE	DownStream Enhancer	25431600	-34322	SYF2	25949	protein-coding
chr1	25415069	25415630	1#[GAAAGAGGAAGTC:301:0.8751137954250415]	2#[TGGGGAAG:241:0.925367388796723] [TGAGGAAA:435:0.8667187803472263]	1#[TGACCA:105:0.8180826906887997]	563	320	127	1239.18	94.92	0	-	NM_015484	DE	DownStream Enhancer	25431600	-16211	SYF2	25949	protein-coding
chr1	25704254	25705285	1#[CAAAGAGGAACTG:672:0.8726843372667745]	3#[AGAGGAAG:280:1.0] [GGAGGAAC:193:0.8529395658181258] [CTTCTTCT:449:0.8392187832339122]	1#[TGGTCA:958:0.8180826906887997]	1033	697	104	627.31	32.03	0	+	NM_018202	DE	DownStream Enhancer	25629974	74977	TMEM57	55219	protein-coding
chr1	25748553	25749224	0#	2#[TGGGGAAG:537:0.925367388796723] [GGAGGAAG:618:0.9250330832242935]	1#[AGGTCA:89:1.0]	673	424	34	123.13	14.53	0.07	+	NM_015627	Body	Gene Body	25742662	6315	LDLRAP1	26119	protein-coding
chr1	25755909	25756220	0#	2#[CTTCCTCC:303:0.9250330832242935] [GGGGGAAG:83:0.8746876521289542]	0#	313	85	21	117.97	20.62	0.08	+	NM_015627	Body	Gene Body	25742662	13332	LDLRAP1	26119	protein-coding
chr1	25761421	25762107	1#[CACTTCCTGTTTT:285:0.9248757402387298]	0#	1#[GGGTCA:435:0.8857896050338628]	688	286	169	1821.54	136.95	0	+	NM_015627	Body	Gene Body	25742662	19045	LDLRAP1	26119	protein-coding
chr1	25783881	25784409	1#[AAAAGAGGAAGTA:395:0.861337611467232]	2#[TGAGGAAG:173:0.9757128198920622] [TGGGGAAG:495:0.925367388796723]	2#[AGGTCA:191:1.0] [AGGTCA:201:1.0]	530	301	27	146.5	12.74	0.04	+	NM_020379	UE	Upstream Enhancer	25816545	-32363	MAN1C1	57134	protein-coding
chr1	25816774	25817139	0#	3#[CTTCCTCT:182:1.0000000000000002] [GTTCCTCT:167:0.9279064825938323] [TGAGGAAA:109:0.8667187803472263]	1#[TGGTCA:196:0.8180826906887997]	367	177	46	211.43	18.14	0.04	+	NM_020379	PP	Proximal Promoter	25816545	406	MAN1C1	57134	protein-coding
chr1	25829832	25830027	1#[GACTTCCTCTTTC:113:0.8751137954250418]	0#	0#	197	118	18	183.71	40.96	0.04	+	NM_020379	Body	Gene Body	25816545	13405	MAN1C1	57134	protein-coding
chr1	25910577	25911115	0#	2#[CTTCCTCC:209:0.9250330832242935] [GGAGGAAG:261:0.9250330832242935]	0#	540	256	85	864.44	101.33	0	+	NM_020379	Body	Gene Body	25816545	94288	MAN1C1	57134	protein-coding
chr1	26008211	26009382	1#[GACTTCCCCTTTT:584:0.8511031310086759]	5#[AGAGGAAG:1024:1.0] [AGAGGAAC:1133:0.9279064825938323] [CTTCCCCA:539:0.925367388796723] [CTTCCTCG:195:0.8840323149896212] [CTTCCTGA:942:0.8653647538446115]	3#[AGGTCA:1089:1.0] [TGACCC:377:0.8857896050338628] [TGACCC:697:0.8857896050338628]	1173	588	237	1468.05	64.48	0	+	NM_020451	Body	Gene Body	25999253	9546	SEPN1	57190	protein-coding
chr1	26016888	26017192	0#	1#[GGAGGAAG:69:0.9250330832242935]	1#[TGACCT:10:1.0]	306	79	23	119.87	17.89	0.08	+	NM_020451	Body	Gene Body	25999253	17714	SEPN1	57190	protein-coding
chr1	26019681	26020803	0#	6#[AGAGGAAG:678:1.0] [CTTCCCCT:880:0.9496545689046608] [GTTCCTCT:235:0.9279064825938323] [GTTCCCCT:145:0.8775610514984932] [GGGGGAAG:89:0.8746876521289542] [ATTCCTCT:621:0.840598909800833]	4#[TGACCT:863:1.0] [TGACCC:296:0.8857896050338628] [TGACCC:1039:0.8857896050338628] [TGACCA:852:0.8180826906887997]	1124	683	139	532.41	26.98	0	+	NM_019557	PP	Proximal Promoter	26019270	1094	FAM54B	56181	protein-coding
chr1	26058461	26059065	0#	0#	1#[GGGTCA:566:0.8857896050338628]	606	409	42	133.81	16.15	0.05	-	NM_024037	PP	Proximal Promoter	26058435	435	AUNIP	79000	protein-coding
chr1	26070271	26070782	0#	4#[CTTCCTCA:359:0.9757128198920624] [AGGGGAAG:125:0.9496545689046608] [CTTCCCCT:343:0.9496545689046608] [CTTCCTCC:335:0.9250330832242935]	1#[AGGTCA:395:1.0]	513	331	43	188.31	17.15	0.04	-	NM_178422	PP	Proximal Promoter	26070331	271	PAQR7	164091	protein-coding
chr1	26071613	26072128	1#[CACTTCCTCTTTT:364:1.0]	0#	2#[TGACCT:65:1.0] [GGGTCA:5:0.8857896050338628]	517	370	56	399.64	44.49	0.03	-	NM_178422	PP	Proximal Promoter	26070331	1652	PAQR7	164091	protein-coding
chr1	26113623	26113972	1#[GACTTCCCCTTTT:269:0.8511031310086759]	0#	0#	351	269	44	447.36	69.36	0.04	-	NR_037481	UE	Upstream Enhancer	26105532	8360	MIR3917	100500808	miscRNA
chr1	26122124	26122847	0#	4#[CTTCCTCT:315:1.0000000000000002] [CTTCCTCC:438:0.9250330832242935] [TTTCCTCT:212:0.8910059604551641] [CTTCCCCG:95:0.8336868838942818]	2#[AGGTCA:497:1.0] [TGACCG:322:0.8490319803691448]	725	443	68	449.23	42.15	0.02	-	NR_037481	UE	Upstream Enhancer	26105532	17035	MIR3917	100500808	miscRNA
chr1	26189854	26190260	0#	2#[TTTCCTCT:125:0.8910059604551641] [CTTCCTGT:136:0.8896519339525494]	1#[TGACCC:31:0.8857896050338628]	408	125	36	155.59	13.55	0.03	-	NM_000437	Body	Gene Body	26197235	-7256	PAFAH2	5051	protein-coding
chr1	26196046	26196560	0#	2#[GGAGGAAG:256:0.9250330832242935] [TGAGGAAA:264:0.8667187803472263]	1#[TGACCT:241:1.0]	516	269	54	252.49	18.67	0.03	-	NM_000437	PP	Proximal Promoter	26197235	-920	PAFAH2	5051	protein-coding
chr1	26226788	26227130	0#	1#[CTTCCTCA:160:0.9757128198920624]	0#	344	193	32	168.1	18.4	0.03	+	NM_004455	Body	Gene Body	26220857	6124	EXTL1	2134	protein-coding
chr1	26304057	26304430	1#[CATTTCCTTTTTT:204:0.8039339578528892]	1#[CTTCCCCT:335:0.9496545689046608]	0#	375	211	18	129.76	24.22	0.06	+	NM_001243532	UE	Upstream Enhancer	26310242	-5974	PDIK1L	149420	protein-coding
chr1	26458683	26459044	0#	2#[TGAGGAAG:170:0.9757128198920622] [ACAGGAAG:185:0.8896519339525494]	1#[TGACCT:86:1.0]	363	203	53	335.57	26.16	0.02	+	NM_022778	Body	Gene Body	26433279	25607	CEP85	64793	protein-coding
chr1	26473856	26474228	0#	1#[AGAAGAAG:209:0.839218783233912]	2#[AGGTCA:35:1.0] [TGGTCA:4:0.8180826906887997]	374	223	51	337.54	23.26	0.02	+	NM_022778	Body	Gene Body	26433279	40800	CEP85	64793	protein-coding
chr1	26475287	26475795	0#	5#[CTTCCTCT:99:1.0000000000000002] [CTTCCTCT:276:1.0000000000000002] [TGGGGAAG:207:0.925367388796723] [ACAGGAAG:140:0.8896519339525494] [CTTCCACA:244:0.8565942509560106]	1#[TGACCC:495:0.8857896050338628]	510	257	71	286.97	16.1	0.04	+	NM_022778	Body	Gene Body	26433279	42265	CEP85	64793	protein-coding
chr1	26477900	26478462	0#	3#[TGAGGAAG:295:0.9757128198920622] [TCAGGAAG:266:0.8653647538446115] [GGAGGAAC:99:0.8529395658181258]	1#[GGGTCA:549:0.8857896050338628]	564	301	43	169.1	17.44	0.03	+	NM_031286	PP	Proximal Promoter	26478799	-598	SH3BGRL3	83442	protein-coding
chr1	26479392	26479845	0#	1#[CTTCCCGT:102:0.83930650285721]	4#[TGACCC:161:0.8857896050338628] [TGACCC:235:0.8857896050338628] [TGACCA:167:0.8180826906887997] [TGGTCA:364:0.8180826906887997]	455	205	40	184.05	17.14	0.04	+	NM_031286	PP	Proximal Promoter	26478799	798	SH3BGRL3	83442	protein-coding
chr1	26487215	26489214	1#[CACTTCCTCTTTG:534:0.9580159982826505]	4#[CTTCCTCT:1058:1.0000000000000002] [AGGGGAAG:195:0.9496545689046608] [GGAGGAAG:1122:0.9250330832242935] [ACAGGAAG:1729:0.8896519339525494]	4#[AGGTCA:21:1.0] [AGGTCA:475:1.0] [TGACCC:425:0.8857896050338628] [TGACCC:1704:0.8857896050338628]	2001	538	369	2361.22	75.93	0	-	NM_183008	Body	Gene Body	26505782	-18029	UBXN11	91544	protein-coding
chr1	26489221	26490065	0#	4#[AGAGGAAG:532:1.0] [AGGGGAAG:608:0.9496545689046608] [AGGGGAAC:654:0.8775610514984932] [GGGGGAAG:706:0.8746876521289542]	5#[GGGTCA:188:0.8857896050338628] [TGACCC:215:0.8857896050338628] [GGGTCA:427:0.8857896050338628] [TGACCA:729:0.8180826906887997] [TGACCA:778:0.8180826906887997]	846	605	62	154.25	9.61	0.03	-	NM_183008	Body	Gene Body	26505782	-15956	UBXN11	91544	protein-coding
chr1	26491898	26492259	1#[AAAATGGGAAGTG:65:0.8660989017509262]	0#	0#	363	109	29	153.66	17.53	0.03	-	NM_183008	Body	Gene Body	26505782	-13775	UBXN11	91544	protein-coding
chr1	26504741	26505068	1#[CACTTCCCCCTTC:75:0.8626637250013409]	1#[CTTCCTCC:67:0.9250330832242935]	0#	329	97	33	283.05	36.54	0.04	-	NM_183008	PP	Proximal Promoter	26505782	-944	UBXN11	91544	protein-coding
chr1	26517687	26517978	0#	1#[CTTCCCCA:186:0.925367388796723]	1#[TGACCT:252:1.0]	293	187	24	118.04	16.18	0.08	+	NM_001803	PP	Proximal Promoter	26516997	877	CD52	1043	protein-coding
chr1	26545442	26545710	0#	2#[CTTCCTGT:77:0.8896519339525494] [CTTCCACT:101:0.8808814310639483]	0#	270	121	17	112.15	22	0.1	-	NM_001039775	Body	Gene Body	26553208	-7645	AIM1L	55057	protein-coding
chr1	26577214	26578012	0#	4#[CTTCCCCT:625:0.9496545689046608] [TGGGGAAG:553:0.925367388796723] [CTTCCTCC:173:0.9250330832242935] [TCAGGAAG:329:0.8653647538446115]	4#[AGGTCA:326:1.0] [TGACCT:644:1.0] [AGGTCA:700:1.0] [AGGTCA:747:1.0]	800	173	146	1194.31	63.26	0	-	NM_001114759	UE	Upstream Enhancer	26571853	5534	ZNF683	257101	protein-coding
chr1	26595442	26595687	0#	1#[CTTCCTGT:130:0.8896519339525494]	2#[TGACCT:114:1.0] [GGGTCA:124:0.8857896050338628]	247	114	34	256.6	28.72	0.04	+	NM_024674	UE	Upstream Enhancer	26609855	-14299	LIN28A	79727	protein-coding
chr1	26631147	26631636	0#	3#[TGAGGAAG:253:0.9757128198920622] [CTTCCCCA:27:0.925367388796723] [CTTCCACA:114:0.8565942509560106]	1#[CGGTCA:81:0.8490319803691448]	491	257	67	312.11	23.76	0.02	+	NM_001243565	PP	Proximal Promoter	26631359	45	DHDDS	79947	protein-coding
chr1	26669203	26669873	0#	2#[CTTCCCCT:442:0.9496545689046608] [CTTCTTCT:184:0.8392187832339122]	2#[TGACCT:249:1.0] [GGGTCA:6:0.8857896050338628]	672	328	65	324.68	24.81	0.02	+	NM_001243565	Body	Gene Body	26631359	38172	DHDDS	79947	protein-coding
chr1	26740532	26742561	1#[TAAAGAGGAAGTC:482:0.8440253586068771]	6#[TGAGGAAG:820:0.9757128198920622] [AGGGGAAG:918:0.9496545689046608] [TGGGGAAG:338:0.925367388796723] [GGAGGAAG:470:0.9250330832242935] [CTTCCTGT:616:0.8896519339525494] [GGGGGAAG:1594:0.8746876521289542]	6#[TGACCT:182:1.0] [GGGTCA:1515:0.8857896050338628] [TGACCC:1563:0.8857896050338628] [TGGTCA:1078:0.8180826906887997] [TGGTCA:1135:0.8180826906887997] [TGGTCA:1685:0.8180826906887997]	2031	932	512	2600.76	33.59	0	+	NM_002953	Body	Gene Body	26728835	12629	RPS6KA1	6195	protein-coding
chr1	26754548	26755087	0#	1#[GGGGGAAG:344:0.8746876521289542]	1#[TGACCT:331:1.0]	541	336	31	119.38	13.42	0.08	+	NM_002953	Body	Gene Body	26728835	26049	RPS6KA1	6195	protein-coding
chr1	26798024	26798324	0#	2#[CTTCCTCT:110:1.0000000000000002] [GGAGGAAC:183:0.8529395658181258]	1#[GGGTCA:177:0.8857896050338628]	302	180	15	110.73	27.91	0.1	+	NM_002953	DE	DownStream Enhancer	26728835	69369	RPS6KA1	6195	protein-coding
chr1	26744543	26745091	0#	1#[AGAGGAAG:250:1.0]	0#	550	254	61	164.43	10.66	0.03	+	NM_001006665	PP	Proximal Promoter	26744929	-132	RPS6KA1	6195	protein-coding
chr1	26876623	26877023	0#	3#[AGAGGAAG:213:1.0] [GGAGGAAG:126:0.9250330832242935] [AGGGGAAC:341:0.8775610514984932]	2#[GGGTCA:388:0.8857896050338628] [TGGTCA:63:0.8180826906887997]	402	149	49	194.41	15.43	0.04	+	NM_006015	UE	Upstream Enhancer	26895108	-18336	ARID1A	8289	protein-coding
chr1	26883918	26884177	0#	2#[TGAGGAAG:99:0.9757128198920622] [TTTCCTCA:228:0.8667187803472263]	1#[AGGTCA:133:1.0]	261	85	25	154.52	20.23	0.03	+	NM_006015	UE	Upstream Enhancer	26895108	-11105	ARID1A	8289	protein-coding
chr1	26891782	26892528	0#	2#[AGGGGAAG:117:0.9496545689046608] [GGAGGAAG:57:0.9250330832242935]	0#	748	584	40	117.91	9.3	0.08	+	NM_006015	UE	Upstream Enhancer	26895108	-2742	ARID1A	8289	protein-coding
chr1	26943087	26943633	0#	2#[CTTCCCCA:470:0.925367388796723] [ATTCCTCT:343:0.840598909800833]	0#	548	272	69	291.44	16.18	0.04	+	NM_006015	Body	Gene Body	26895108	48251	ARID1A	8289	protein-coding
chr1	26985174	26985670	0#	2#[AGCGGAAG:269:0.9370344629705611] [TTTCCCCT:482:0.8406605293598248]	0#	498	251	30	113.14	15.72	0.1	+	NM_017837	PP	Proximal Promoter	26987040	-1615	PIGV	55650	protein-coding
chr1	27019684	27020166	0#	0#	0#	484	251	43	228.01	24.15	0.03	+	NM_032283	UE	Upstream Enhancer	27025787	-5852	ZDHHC18	84243	protein-coding
chr1	27088647	27089594	0#	2#[AGAGGAAG:203:1.0] [AGAGGAAG:755:1.0]	1#[AGGTCA:549:1.0]	949	768	90	292.89	19.56	0.04	-	NM_018066	PP	Proximal Promoter	27089456	-41	GPN2	54707	protein-coding
chr1	27200762	27201560	0#	5#[AGCGGAAG:352:0.9370344629705611] [CTTCCCCA:422:0.925367388796723] [GTTCCTCA:396:0.9036193024858946] [ACAGGAAG:267:0.8896519339525494] [GGAGGAAC:612:0.8529395658181258]	2#[AGGTCA:109:1.0] [TGACCT:146:1.0]	800	354	218	2048.55	89.64	0	+	NM_001013642	DE	DownStream Enhancer	27192781	8335	TRNP1	388610	protein-coding
chr1	27211996	27212459	0#	0#	2#[TGACCT:241:1.0] [GGGTCA:222:0.8857896050338628]	465	234	30	160.16	11.63	0.03	-	NM_052943	PP	Proximal Promoter	27211920	310	FAM46B	115572	protein-coding
chr1	27214072	27214854	1#[CACTTCCTCTTTC:372:0.9837820116239607]	2#[CTTCCTCT:449:1.0000000000000002] [TGGGGAAG:509:0.925367388796723]	5#[TGACCT:275:1.0] [TGACCT:503:1.0] [AGGTCA:742:1.0] [TGACCA:495:0.8180826906887997] [TGACCA:765:0.8180826906887997]	784	377	229	1783.55	68.1	0	-	NM_052943	UE	Upstream Enhancer	27211920	2529	FAM46B	115572	protein-coding
chr1	27230821	27231060	0#	1#[CTTCCTCC:141:0.9250330832242935]	0#	241	164	20	119.13	15.86	0.08	-	NM_052943	UE	Upstream Enhancer	27211920	19065	FAM46B	115572	protein-coding
chr1	27237039	27237681	0#	2#[GGAGGAAG:283:0.9250330832242935] [TTTCCTCA:575:0.8667187803472263]	0#	644	139	48	187.32	12.73	0.04	-	NM_052943	UE	Upstream Enhancer	27211920	25258	FAM46B	115572	protein-coding
chr1	27296558	27296886	0#	0#	0#	330	159	38	300.81	34.5	0.03	-	NM_003047	DE	DownStream Enhancer	27354208	-57491	SLC9A1	6548	protein-coding
chr1	27305497	27306290	0#	1#[AGAGGAAG:204:1.0]	1#[GGGTCA:0:0.8857896050338628]	795	220	88	510.09	27.73	0	-	NM_003047	Body	Gene Body	27354208	-48491	SLC9A1	6548	protein-coding
chr1	27311121	27311751	0#	4#[AGAGGAAG:146:1.0] [GGAGGAAG:460:0.9250330832242935] [CTTCCTGA:281:0.8653647538446115] [GGAGGAAC:215:0.8529395658181258]	1#[AGGTCA:177:1.0]	632	220	84	203.62	9.33	0.03	-	NM_003047	Body	Gene Body	27354208	-42867	SLC9A1	6548	protein-coding
chr1	27315675	27316340	0#	4#[GTTCCTCT:300:0.9279064825938323] [GTTCCTCT:482:0.9279064825938323] [TCAGGAAG:381:0.8653647538446115] [ATTCCTCT:319:0.840598909800833]	1#[TGACCA:396:0.8180826906887997]	667	268	158	1071.11	43.95	0	-	NM_003047	Body	Gene Body	27354208	-38265	SLC9A1	6548	protein-coding
chr1	27335815	27336643	0#	2#[CTTCCTCT:643:1.0000000000000002] [CTTCCGCC:625:0.8620675461948546]	1#[TGGTCA:143:0.8180826906887997]	830	624	114	456.87	25.84	0	-	NM_003047	Body	Gene Body	27354208	-17769	SLC9A1	6548	protein-coding
chr1	27434576	27434852	1#[TAAATAGGAAGTG:75:0.8590211293491276]	0#	0#	278	105	23	110.05	14.55	0.1	+	NM_015023	Body	Gene Body	27433593	1088	WDTC1	23038	protein-coding
chr1	27499319	27500270	1#[CACTTCCTCTTTC:241:0.9837820116239607]	4#[CTTCCCCA:258:0.925367388796723] [CTTCCCCA:530:0.925367388796723] [ACAGGAAG:903:0.8896519339525494] [GGGGGAAG:618:0.8746876521289542]	2#[TGACCT:230:1.0] [TGGTCA:494:0.8180826906887997]	953	259	84	364.37	26.6	0.03	+	NM_015023	Body	Gene Body	27433593	65985	WDTC1	23038	protein-coding
chr1	27542117	27542887	0#	3#[AGAGGAAG:418:1.0] [ACAGGAAG:460:0.8896519339525494] [CGGGGAAG:111:0.8336868838942818]	1#[TGACCA:156:0.8180826906887997]	772	434	127	689.53	32.74	0	+	NM_001193308	Body	Gene Body	27541069	1482	SYTL1	84958	protein-coding
chr1	27568407	27569229	1#[CACTTCCCTCTTT:529:0.8055784078241879]	3#[GTTCCTCT:590:0.9279064825938323] [CTTCCTCC:649:0.9250330832242935] [GGAGGAAC:469:0.8529395658181258]	1#[TGGTCA:94:0.8180826906887997]	824	531	97	561.34	29.54	0	-	NM_003665	Body	Gene Body	27573902	-4964	FCN3	8547	protein-coding
chr1	27621120	27621416	0#	2#[AGAGGAAG:191:1.0] [CTTCCCCA:215:0.925367388796723]	0#	298	206	21	152.57	29.45	0.03	-	NM_006990	Body	Gene Body	27689265	-67939	WASF2	10163	protein-coding
chr1	27630014	27630345	0#	2#[ACAGGAAG:126:0.8896519339525494] [TGGGGAAC:143:0.8532738713905553]	1#[TGACCA:18:0.8180826906887997]	333	136	32	252.96	35.33	0.03	-	NM_006990	Body	Gene Body	27689265	-59115	WASF2	10163	protein-coding
chr1	27634778	27635422	1#[CAGTTCCTCTTTG:269:0.8726843372667749]	1#[TTTCCTCT:445:0.8910059604551641]	2#[AGGTCA:170:1.0] [TGGTCA:199:0.8180826906887997]	646	329	182	1576.35	69.65	0	-	NM_006990	Body	Gene Body	27689265	-54158	WASF2	10163	protein-coding
chr1	27687741	27688021	0#	2#[AGAGGAAA:177:0.8910059604551641] [CTTCCCCC:153:0.874687652128954]	0#	282	161	26	112.52	11.8	0.1	-	NM_006990	Body	Gene Body	27689265	-1363	WASF2	10163	protein-coding
chr1	27713058	27713505	0#	2#[AGGGGAAG:205:0.9496545689046608] [CTTCCACA:402:0.8565942509560106]	2#[GGGTCA:378:0.8857896050338628] [TGACCA:117:0.8180826906887997]	449	237	48	302.03	26.16	0.03	-	NM_006990	UE	Upstream Enhancer	27689265	24030	WASF2	10163	protein-coding
chr1	27724306	27725150	0#	5#[AGGGGAAG:491:0.9496545689046608] [TTTCCTCT:534:0.8910059604551641] [CTTCCCCC:526:0.874687652128954] [TCAGGAAG:576:0.8653647538446115] [GGAGGAAC:460:0.8529395658181258]	0#	846	495	85	203.26	13.44	0.03	-	NM_001029882	DE	DownStream Enhancer	27802730	-77929	AHDC1	27245	protein-coding
chr1	27794212	27794538	0#	1#[TGGGGAAG:150:0.925367388796723]	0#	328	162	34	185.16	19.07	0.04	-	NM_001029882	Body	Gene Body	27802730	-8356	AHDC1	27245	protein-coding
chr1	27817451	27818199	0#	3#[CTTCCTCA:527:0.9757128198920624] [CTTCCCCA:423:0.925367388796723] [TTTCCTCT:710:0.8910059604551641]	2#[TGACCT:306:1.0] [AGGTCA:606:1.0]	750	133	57	285.05	21.32	0.04	-	NM_001042747	Body	Gene Body	27825338	-7754	FGR	2268	protein-coding
chr1	27825194	27825517	0#	1#[AGAGGAAC:143:0.9279064825938323]	1#[AGGTCA:84:1.0]	325	155	43	326.98	33.83	0.02	-	NM_001042747	PP	Proximal Promoter	27825338	11	FGR	2268	protein-coding
chr1	27830555	27831134	0#	1#[TGAGGAAG:229:0.9757128198920622]	2#[GGGTCA:160:0.8857896050338628] [GGGTCA:465:0.8857896050338628]	581	217	42	120.19	10.13	0.07	-	NM_005248	Body	Gene Body	27834314	-3542	FGR	2268	protein-coding
chr1	27831867	27832318	0#	3#[CTTCCCCA:152:0.925367388796723] [ACAGGAAG:37:0.8896519339525494] [ACAGGAAG:351:0.8896519339525494]	1#[AGGTCA:108:1.0]	453	196	38	135.44	12.88	0.05	-	NM_005248	Body	Gene Body	27834314	-2251	FGR	2268	protein-coding
chr1	27972617	27973121	0#	3#[CTTCCTCC:264:0.9250330832242935] [TTTCCTCT:285:0.8910059604551641] [CTTCCTGT:432:0.8896519339525494]	1#[TGGTCA:235:0.8180826906887997]	506	399	52	299.88	24.15	0.04	+	NM_177424	PP	Proximal Promoter	27972280	736	STX12	23673	protein-coding
chr1	28062285	28062693	0#	3#[CTTCCTCT:128:1.0000000000000002] [TTTCCTCT:329:0.8910059604551641] [GTTCCCCA:58:0.8532738713905553]	0#	410	131	40	148.45	11.63	0.04	+	NM_004848	UE	Upstream Enhancer	28071641	-9225	THEMIS2	9473	protein-coding
chr1	28063259	28063846	0#	3#[CTTCCTCT:330:1.0000000000000002] [CTTCCCCA:319:0.925367388796723] [CTTCCTCC:99:0.9250330832242935]	0#	589	364	54	351.29	31.49	0.03	+	NM_004848	UE	Upstream Enhancer	28071641	-8018	THEMIS2	9473	protein-coding
chr1	28067935	28068919	0#	5#[CTTCCTCT:313:1.0000000000000002] [TGGGGAAG:727:0.925367388796723] [TGAGGAAC:561:0.9036193024858946] [TTTCCTCA:838:0.8667187803472263] [GTTCCTCC:783:0.8529395658181256]	3#[TGACCC:185:0.8857896050338628] [TGACCC:447:0.8857896050338628] [TGACCA:753:0.8180826906887997]	986	568	109	361.72	15.21	0.03	+	NM_004848	UE	Upstream Enhancer	28071641	-3138	THEMIS2	9473	protein-coding
chr1	28083798	28084712	0#	4#[AGAGGAAG:501:1.0] [CTTCCCCA:547:0.925367388796723] [ACAGGAAG:707:0.8896519339525494] [TTTCCCCT:295:0.8406605293598248]	5#[AGGTCA:33:1.0] [TGACCT:87:1.0] [AGGTCA:466:1.0] [TGACCG:525:0.8490319803691448] [TGACCA:326:0.8180826906887997]	916	514	141	1130.99	79.28	0	+	NM_004848	Body	Gene Body	28071641	12671	THEMIS2	9473	protein-coding
chr1	28084747	28085537	0#	4#[CTTCCTCA:724:0.9757128198920624] [GTTCCTCT:542:0.9279064825938323] [TGAGGAAA:143:0.8667187803472263] [GGAGGAAC:279:0.8529395658181258]	0#	792	170	70	322.72	24.03	0.02	+	NM_004848	Body	Gene Body	28071641	13276	THEMIS2	9473	protein-coding
chr1	28086303	28086899	1#[CACTTCCTGGTTT:238:0.8211722016409788]	3#[TGAGGAAG:490:0.9757128198920622] [TTTCCTCT:113:0.8910059604551641] [GTTCCTCC:543:0.8529395658181256]	1#[CGGTCA:152:0.8490319803691448]	598	227	86	461.96	26.08	0	+	NM_004848	DE	DownStream Enhancer	28071641	14889	THEMIS2	9473	protein-coding
chr1	28113553	28114147	0#	1#[AGCGGAAG:289:0.9370344629705611]	0#	596	385	48	110.64	8.66	0.1	-	NM_002946	PP	Proximal Promoter	28113823	115	RPA2	6118	protein-coding
chr1	28130864	28131508	0#	2#[CTTCCACA:585:0.8565942509560106] [GTTCCTCC:71:0.8529395658181256]	0#	646	82	55	219.35	22.53	0.04	+	NM_014474	UE	Upstream Enhancer	28134090	-3144	SMPDL3B	27293	protein-coding
chr1	28142357	28142927	0#	2#[GGAGGAAG:325:0.9250330832242935] [TGAGGAAA:352:0.8667187803472263]	2#[AGGTCA:525:1.0] [GGGTCA:154:0.8857896050338628]	572	348	62	258.94	20.51	0.04	+	NM_014474	Body	Gene Body	28134090	8615	SMPDL3B	27293	protein-coding
chr1	28220271	28220526	0#	1#[CTTCCTCA:139:0.9757128198920624]	1#[TGACCT:160:1.0]	257	125	32	168.1	15.54	0.03	-	NM_001990	Body	Gene Body	28287735	-67339	EYA3	2140	protein-coding
chr1	28255324	28255765	0#	3#[CTTCCTCC:155:0.9250330832242935] [AGGGGAAC:230:0.8775610514984932] [CTTCCCCC:195:0.874687652128954]	1#[TGACCA:180:0.8180826906887997]	443	218	28	164.96	27.62	0.03	-	NM_001990	Body	Gene Body	28287735	-32193	EYA3	2140	protein-coding
chr1	28311839	28312495	0#	2#[GGGGGAAG:228:0.8746876521289542] [AGGGGAAA:59:0.8406605293598248]	4#[AGGTCA:24:1.0] [TGACCC:144:0.8857896050338628] [TGGTCA:168:0.8180826906887997] [TGACCA:576:0.8180826906887997]	658	238	45	203.63	10.52	0.03	-	NM_001990	UE	Upstream Enhancer	28287735	24342	EYA3	2140	protein-coding
chr1	28314306	28314726	0#	1#[ACAGGAAG:240:0.8896519339525494]	0#	422	237	35	225.52	28.22	0.03	-	NM_001990	UE	Upstream Enhancer	28287735	26808	EYA3	2140	protein-coding
chr1	28325850	28326298	1#[CACTTCCACATTC:153:0.8302893806277316]	1#[ACAGGAAG:249:0.8896519339525494]	1#[TGACCA:366:0.8180826906887997]	450	252	46	359.22	30.52	0.03	-	NM_001990	UE	Upstream Enhancer	28287735	38367	EYA3	2140	protein-coding
chr1	28326626	28327227	1#[GAAAGGGGAAGTG:270:0.9435533588315553]	2#[CTTCCTCA:359:0.9757128198920624] [TGAGGAAC:84:0.9036193024858946]	2#[TGACCT:480:1.0] [TGACCG:457:0.8490319803691448]	603	307	97	600.45	37.47	0	-	NM_001990	UE	Upstream Enhancer	28287735	39198	EYA3	2140	protein-coding
chr1	28342637	28343009	0#	2#[AGAGGAAG:150:1.0] [CTTCCACT:186:0.8808814310639483]	1#[GGGTCA:205:0.8857896050338628]	374	158	26	123.05	17.44	0.07	-	NM_000952	DE	DownStream Enhancer	28376042	-33247	PTAFR	5724	protein-coding
chr1	28355813	28356342	0#	1#[CTTCCTCT:270:1.0000000000000002]	0#	531	269	52	260.03	24.7	0.04	-	NM_000952	Body	Gene Body	28376042	-19960	PTAFR	5724	protein-coding
chr1	28368476	28368803	0#	0#	0#	329	199	18	112.54	16.85	0.1	-	NM_000952	Body	Gene Body	28376042	-7367	PTAFR	5724	protein-coding
chr1	28371551	28372256	1#[AAAAAAGGAAGTG:437:0.9266966944468076]	1#[CTTCCTCA:98:0.9757128198920624]	0#	707	468	109	551.66	30.83	0	-	NM_000952	Body	Gene Body	28376042	-4023	PTAFR	5724	protein-coding
chr1	28373726	28374041	0#	2#[CTTCCCCA:235:0.925367388796723] [TTTCCTCA:135:0.8667187803472263]	0#	317	237	22	118.64	19.01	0.08	-	NM_000952	Body	Gene Body	28376042	-2079	PTAFR	5724	protein-coding
chr1	28375533	28376033	0#	1#[AGAGGAAA:446:0.8910059604551641]	2#[TGACCT:82:1.0] [TGACCG:187:0.8490319803691448]	502	294	87	717.48	50.39	0	-	NM_000952	PP	Proximal Promoter	28376042	-215	PTAFR	5724	protein-coding
chr1	28376085	28376673	0#	2#[AGAGGAAC:115:0.9279064825938323] [CTTCCGCC:509:0.8620675461948546]	1#[TGGTCA:332:0.8180826906887997]	590	337	34	160.86	11.43	0.03	-	NM_000952	PP	Proximal Promoter	28376042	380	PTAFR	5724	protein-coding
chr1	28389594	28390138	1#[GAATGAGGAAGTG:43:0.9250100565787833]	4#[CTTCCTCT:530:1.0000000000000002] [CTTCCTCA:350:0.9757128198920624] [GGAGGAAG:184:0.9250330832242935] [CTTCCTCC:290:0.9250330832242935]	0#	546	80	37	144.67	15.08	0.04	-	NM_001164721	Body	Gene Body	28393034	-3360	PTAFR	5724	protein-coding
chr1	28525658	28526053	0#	1#[AGGGGAAG:120:0.9496545689046608]	1#[TGACCT:361:1.0]	397	156	37	313.45	51.88	0.02	+	NM_017638	UE	Upstream Enhancer	28528099	-2285	MED18	54797	protein-coding
chr1	28847176	28847576	0#	4#[CTTCCCCA:107:0.925367388796723] [CTTCCACT:14:0.8808814310639483] [GTTCCTCC:223:0.8529395658181256] [CTTCCCCG:249:0.8336868838942818]	1#[TGACCT:4:1.0]	402	209	47	164.26	14.02	0.03	+	NR_004407	PP	Proximal Promoter	28847698	-313	RNU11	26824	snRNA
chr1	28868535	28868915	0#	2#[AGGGGAAG:143:0.9496545689046608] [TGAGGAAA:348:0.8667187803472263]	1#[CGGTCA:300:0.8490319803691448]	382	172	30	178.36	24.43	0.04	+	NM_006582	PP	Proximal Promoter	28867826	881	GMEB1	10691	protein-coding
chr1	28868982	28869263	0#	1#[CTTCCTCC:221:0.9250330832242935]	1#[TGACCT:47:1.0]	283	75	15	114.85	25.58	0.1	+	NM_006582	Body	Gene Body	28867826	1231	GMEB1	10691	protein-coding
chr1	28914070	28914561	1#[AAAAAGGGAAGTG:331:0.8864680416544026]	2#[AGGGGAAG:59:0.9496545689046608] [AGGGGAAG:302:0.9496545689046608]	3#[AGGTCA:10:1.0] [AGGTCA:411:1.0] [TGACCA:157:0.8180826906887997]	493	346	94	876.24	79.11	0	+	NM_006582	Body	Gene Body	28867826	46590	GMEB1	10691	protein-coding
chr1	29065143	29065619	0#	1#[AGAGGAAA:307:0.8910059604551641]	0#	478	314	50	184.31	14.65	0.04	+	NM_000911	DE	DownStream Enhancer	29011240	54217	OPRD1	4985	protein-coding
chr1	29074255	29074574	0#	1#[AGAAGAAG:35:0.839218783233912]	2#[TGGTCA:52:0.8180826906887997] [TGGTCA:89:0.8180826906887997]	321	211	21	152.57	24.26	0.03	+	NM_203342	UE	Upstream Enhancer	29086189	-11723	EPB41	2035	protein-coding
chr1	29077403	29077855	1#[AAAAGAGGAAATG:17:0.8772372634060811]	2#[AGGGGAAG:347:0.9496545689046608] [CTTCTTCT:380:0.8392187832339122]	1#[TGGTCA:122:0.8180826906887997]	454	93	19	113.3	16.61	0.1	+	NM_203342	UE	Upstream Enhancer	29086189	-8693	EPB41	2035	protein-coding
chr1	29081201	29081564	0#	1#[CTTCCGCC:91:0.8620675461948546]	1#[TGACCT:111:1.0]	365	105	86	651.18	36.38	0	+	NM_203342	UE	Upstream Enhancer	29086189	-4883	EPB41	2035	protein-coding
chr1	29082669	29083267	0#	4#[CTTCCTCA:19:0.9757128198920624] [GGAGGAAG:162:0.9250330832242935] [CTTCCTCC:520:0.9250330832242935] [CTTCCCCG:367:0.8336868838942818]	0#	600	169	28	115.19	11.13	0.09	+	NM_203342	UE	Upstream Enhancer	29086189	-3351	EPB41	2035	protein-coding
chr1	29125987	29126418	0#	3#[GTTCCTCT:416:0.9279064825938323] [ACAGGAAG:207:0.8896519339525494] [AGGGGAAC:243:0.8775610514984932]	1#[TGACCT:262:1.0]	433	249	45	328.15	39.02	0.02	+	NM_203342	Body	Gene Body	29086189	40047	EPB41	2035	protein-coding
chr1	29113985	29114464	0#	1#[TGAGGAAA:105:0.8667187803472263]	1#[TGACCT:469:1.0]	481	127	32	131.41	12.46	0.06	+	NM_001166006	PP	Proximal Promoter	29113674	438	EPB41	2035	protein-coding
chr1	29380867	29381331	0#	4#[CTTCCGCA:337:0.9127472828626235] [CTTCCACT:149:0.8808814310639483] [GGCGGAAG:175:0.8620675461948546] [CTTCCCCG:166:0.8336868838942818]	0#	466	150	50	269.4	20.9	0.04	-	NM_005626	PP	Proximal Promoter	29381224	-207	SRSF4	6429	protein-coding
chr1	29401111	29401656	0#	3#[TGAGGAAC:465:0.9036193024858946] [CTTCCCCC:351:0.874687652128954] [CTTCCTGA:316:0.8653647538446115]	1#[TGGTCA:56:0.8180826906887997]	547	344	36	118.39	10.94	0.08	-	NM_001024732	Body	Gene Body	29430041	-28586	MECR	51102	protein-coding
chr1	29407610	29408197	1#[AAATGAGGAAGTG:122:0.9412280449548224]	0#	0#	589	137	75	575.09	61.63	0	-	NM_001024732	Body	Gene Body	29430041	-22294	MECR	51102	protein-coding
chr1	29481983	29482415	0#	1#[GTTCCTCC:278:0.8529395658181256]	1#[GGGTCA:81:0.8857896050338628]	434	212	30	128.95	11.63	0.07	+	NM_001195001	Body	Gene Body	29435614	46581	PTPRU	10076	protein-coding
chr1	29497257	29497662	1#[CACTTCCTTCTTT:222:0.8458070606165928]	0#	0#	407	223	19	138.12	33.28	0.04	+	NM_001195001	Body	Gene Body	29435614	61866	PTPRU	10076	protein-coding
chr1	29531393	29531656	0#	0#	0#	265	149	40	323.8	33.9	0.02	+	NM_001195001	DE	DownStream Enhancer	29435614	95928	PTPRU	10076	protein-coding
chr1	31008745	31009139	0#	2#[CTTCCCCA:224:0.925367388796723] [CTTCCTCC:146:0.9250330832242935]	0#	396	170	24	126.71	18.96	0.06	-	NR_039616	UE	Upstream Enhancer	30984666	24249	MIR4420	100616164	miscRNA
chr1	31027907	31028175	0#	1#[GGAGGAAG:88:0.9250330832242935]	0#	270	110	20	117.66	18.6	0.08	-	NR_039616	UE	Upstream Enhancer	30984666	43351	MIR4420	100616164	miscRNA
chr1	30985982	30987691	1#[CACTTCCTCTTTT:757:1.0]	6#[TGAGGAAG:1425:0.9757128198920622] [GTTCCTCT:461:0.9279064825938323] [CTTCCCCA:579:0.925367388796723] [ACAGGAAG:372:0.8896519339525494] [ACAGGAAG:1051:0.8896519339525494] [TGGGGAAC:1242:0.8532738713905553]	4#[AGGTCA:903:1.0] [AGGTCA:1162:1.0] [AGGTCA:1496:1.0] [TGACCA:846:0.8180826906887997]	1711	788	161	750.95	32.14	0	-	NM_006762	Body	Gene Body	31003270	-16500	LAPTM5	7805	protein-coding
chr1	30999022	30999414	0#	3#[AGAGGAAC:62:0.9279064825938323] [AGAGGAAC:249:0.9279064825938323] [AGAGGAAA:139:0.8910059604551641]	0#	394	245	39	226.06	24.15	0.03	-	NM_006762	Body	Gene Body	31003270	-4003	LAPTM5	7805	protein-coding
chr1	31001640	31003556	0#	9#[TGAGGAAG:542:0.9757128198920622] [AGGGGAAG:1003:0.9496545689046608] [AGGGGAAG:1607:0.9496545689046608] [GGAGGAAG:601:0.9250330832242935] [ACAGGAAG:473:0.8896519339525494] [GGAGGAAC:774:0.8529395658181258] [GTTCCTCC:87:0.8529395658181256] [GTTCCTCC:1067:0.8529395658181256] [AGGGGAAA:1571:0.8406605293598248]	4#[TGACCC:687:0.8857896050338628] [GGGTCA:1386:0.8857896050338628] [CGGTCA:1045:0.8490319803691448] [CGGTCA:1793:0.8490319803691448]	1918	1618	344	2023.66	37.65	0	-	NM_006762	PP	Proximal Promoter	31003270	-12	LAPTM5	7805	protein-coding
chr1	31137203	31137708	0#	4#[CTTCCTCT:339:1.0000000000000002] [AGAGGAAG:97:1.0] [GTTCCCCA:293:0.8532738713905553] [AGAAGAAG:106:0.839218783233912]	0#	507	128	28	157.17	17.05	0.03	-	NM_014654	Body	Gene Body	31154067	-16736	SDC3	9672	protein-coding
chr1	31427795	31428177	0#	4#[CTTCCCCT:42:0.9496545689046608] [CTTCCCCA:145:0.925367388796723] [GGAGGAAG:254:0.9250330832242935] [CTTCCTCC:277:0.9250330832242935]	0#	384	145	39	304.34	41.12	0.02	-	NM_024522	Body	Gene Body	31485321	-57381	NKAIN1	79570	protein-coding
chr1	31454123	31454460	0#	1#[CTTCCTGT:105:0.8896519339525494]	1#[CGGTCA:42:0.8490319803691448]	339	105	31	208.69	31.4	0.04	-	NM_024522	Body	Gene Body	31485321	-31093	NKAIN1	79570	protein-coding
chr1	31467642	31468103	0#	1#[AGAGGAAG:367:1.0]	3#[GGGTCA:231:0.8857896050338628] [TGACCC:312:0.8857896050338628] [TGACCA:189:0.8180826906887997]	463	144	43	264.25	23.26	0.04	-	NM_024522	Body	Gene Body	31485321	-17535	NKAIN1	79570	protein-coding
chr1	31481948	31482355	0#	3#[GGAGGAAG:288:0.9250330832242935] [AGTGGAAG:250:0.8808814310639483] [GTTCCTCC:120:0.8529395658181256]	0#	409	117	32	151.13	13.29	0.04	-	NM_024522	Body	Gene Body	31485321	-3256	NKAIN1	79570	protein-coding
chr1	31642324	31642868	0#	3#[CTTCCTCA:163:0.9757128198920624] [AGGGGAAG:373:0.9496545689046608] [GGAGGAAG:172:0.9250330832242935]	2#[AGGTCA:488:1.0] [TGGTCA:301:0.8180826906887997]	546	184	112	881.15	58.14	0	+	NM_001199038	UE	Upstream Enhancer	31654998	-12490	SERINC2	347735	protein-coding
chr1	31642917	31643378	0#	2#[CTTCCTCT:265:1.0000000000000002] [CTTCCTCC:354:0.9250330832242935]	5#[TGACCC:86:0.8857896050338628] [GGGTCA:131:0.8857896050338628] [TGACCC:186:0.8857896050338628] [GGGTCA:302:0.8857896050338628] [GGGTCA:445:0.8857896050338628]	463	188	30	139.21	11.63	0.04	+	NM_001199038	UE	Upstream Enhancer	31654998	-11893	SERINC2	347735	protein-coding
chr1	31728750	31729190	0#	3#[TGAGGAAG:155:0.9757128198920622] [AGGGGAAG:58:0.9496545689046608] [CTTCCCCA:421:0.925367388796723]	1#[TGACCA:406:0.8180826906887997]	442	148	44	159.8	13.36	0.03	+	NR_034112	UE	Upstream Enhancer	31744425	-15527	LOC149086	149086	pseudo
chr1	31762493	31762819	0#	1#[CTTCCTCT:166:1.0000000000000002]	1#[TGACCT:0:1.0]	328	137	34	170.54	15.73	0.03	+	NR_027085	DE	DownStream Enhancer	31756622	6008	LOC284551	284551	miscRNA
chr1	31888836	31889173	0#	4#[AGAGGAAG:172:1.0] [CTTCCACT:216:0.8808814310639483] [TTTCCTCA:23:0.8667187803472263] [TTTCCCCT:39:0.8406605293598248]	0#	339	193	25	126.2	16.75	0.07	-	NM_001856	DE	DownStream Enhancer	31942355	-53326	COL16A1	1307	protein-coding
chr1	31945941	31946268	0#	2#[CTTCCTGT:74:0.8896519339525494] [TTTCCCCT:154:0.8406605293598248]	1#[TGACCA:281:0.8180826906887997]	329	121	53	328.62	27.42	0.02	-	NM_001856	UE	Upstream Enhancer	31942355	3707	COL16A1	1307	protein-coding
chr1	32006896	32007899	1#[AAAAGAGGAAGTG:442:0.9999999999999994]	1#[GTTCCTCT:798:0.9279064825938323]	3#[TGACCT:336:1.0] [TGACCT:590:1.0] [GGGTCA:426:0.8857896050338628]	1005	462	199	1724.37	107.56	0	-	NR_036216	UE	Upstream Enhancer	31996923	10435	MIR4254	100423028	miscRNA
chr1	31974781	31975101	0#	1#[AGAAGAAG:91:0.839218783233912]	0#	322	115	19	111.35	18.66	0.1	-	NM_001703	Body	Gene Body	32002235	-27339	BAI2	576	protein-coding
chr1	32050262	32050718	0#	1#[AGAGGAAG:251:1.0]	0#	458	265	44	221.56	21.71	0.03	-	NM_144569	Body	Gene Body	32054167	-3640	SPOCD1	90853	protein-coding
chr1	32140706	32141147	1#[CAAAGAGGAAGTG:144:0.9580159982826502]	0#	1#[AGGTCA:380:1.0]	443	183	57	475.04	52.8	0	-	NM_001195101	DE	DownStream Enhancer	32157846	-16957	PTP4A2	8073	protein-coding
chr1	32192815	32193281	0#	4#[CTTCCTCC:246:0.9250330832242935] [TCAGGAAG:364:0.8653647538446115] [TTTCCCCT:105:0.8406605293598248] [AGGGGAAA:186:0.8406605293598248]	1#[TGACCC:143:0.8857896050338628]	468	237	59	164.57	14.4	0.03	-	NM_001195101	UE	Upstream Enhancer	32157846	35206	PTP4A2	8073	protein-coding
chr1	32194193	32194584	0#	1#[CTTCCCCT:74:0.9496545689046608]	0#	393	213	32	168.1	18.28	0.03	-	NM_001195101	UE	Upstream Enhancer	32157846	36560	PTP4A2	8073	protein-coding
chr1	32176512	32177028	0#	1#[GTTCCGCT:231:0.8649409455643936]	3#[TGACCT:373:1.0] [TGACCC:184:0.8857896050338628] [GGGTCA:423:0.8857896050338628]	518	310	28	127.69	13.25	0.06	-	NM_080391	PP	Proximal Promoter	32176575	247	PTP4A2	8073	protein-coding
chr1	32282482	32282797	1#[AAGAGAGGAAGTG:151:0.8321929406940048]	0#	0#	317	147	20	142.14	23.96	0.04	+	NM_006559	DE	DownStream Enhancer	32252077	30552	KHDRBS1	10657	protein-coding
chr1	32283951	32284327	0#	1#[GTTCCTCA:186:0.9036193024858946]	0#	378	180	30	178.36	21.98	0.04	+	NM_006559	DE	DownStream Enhancer	32252077	32054	KHDRBS1	10657	protein-coding
chr1	32304592	32305178	0#	2#[AGGGGAAG:338:0.9496545689046608] [TTTCCTCA:267:0.8667187803472263]	1#[TGACCA:204:0.8180826906887997]	588	344	104	858.63	50.79	0	+	NM_018056	UE	Upstream Enhancer	32311089	-6153	TMEM39B	55116	protein-coding
chr1	32338484	32338881	0#	2#[CTTCCGCT:254:0.9370344629705614] [CGGGGAAG:281:0.8336868838942818]	0#	399	241	33	206.28	24.36	0.03	+	NM_018056	Body	Gene Body	32311089	27636	TMEM39B	55116	protein-coding
chr1	32360363	32360762	1#[AAATAAGGAAGTG:157:0.8679247394016302]	0#	0#	401	167	32	235.12	32.64	0.03	+	NM_012316	Body	Gene Body	32346230	14300	KPNA6	23633	protein-coding
chr1	32418119	32418429	0#	0#	1#[TGACCC:228:0.8857896050338628]	312	149	25	132.6	15.5	0.05	+	NM_175852	PP	Proximal Promoter	32417931	337	TXLNA	200081	protein-coding
chr1	32460111	32460818	0#	1#[CTTCCTCG:498:0.8840323149896212]	2#[TGACCT:459:1.0] [TGACCC:121:0.8857896050338628]	709	191	54	124.69	6.98	0.07	-	NM_019118	PP	Proximal Promoter	32460513	-211	TMEM234	56063	protein-coding
chr1	32478781	32479199	0#	1#[GGAGGAAG:221:0.9250330832242935]	0#	420	229	21	117.97	22.79	0.08	-	NR_026850	PP	Proximal Promoter	32479898	-888	MTMR9LP	339483	pseudo
chr1	32480650	32480996	0#	1#[CTTCCTCC:96:0.9250330832242935]	0#	348	94	28	192.18	29.07	0.04	-	NR_026850	PP	Proximal Promoter	32479898	846	MTMR9LP	339483	pseudo
chr1	32484698	32485019	1#[AAAAAGGGAACTG:182:0.8011363806385269]	0#	0#	323	198	20	120.19	22.97	0.07	+	NM_032648	PP	Proximal Promoter	32485404	-508	FAM167B	84734	protein-coding
chr1	32554491	32554726	1#[AAATGAGGAAATG:92:0.818465308360904]	0#	0#	237	117	28	304.69	61.44	0.02	+	NM_004964	Body	Gene Body	32530294	24314	HDAC1	3065	protein-coding
chr1	32575521	32576403	0#	1#[TCAGGAAG:395:0.8653647538446115]	4#[TGACCT:657:1.0] [GGGTCA:770:0.8857896050338628] [TGACCA:232:0.8180826906887997] [TGGTCA:540:0.8180826906887997]	884	249	71	268.59	14.36	0.04	-	NM_023009	PP	Proximal Promoter	32574427	1343	MARCKSL1	65108	protein-coding
chr1	32577428	32578502	0#	2#[GTTCCTCT:484:0.9279064825938323] [GGAGGAAG:648:0.9250330832242935]	0#	1076	485	147	840.66	51.3	0	-	NM_023009	UE	Upstream Enhancer	32574427	3486	MARCKSL1	65108	protein-coding
chr1	32592083	32592466	0#	3#[CTTCCTCT:315:1.0000000000000002] [CTTCCTCA:153:0.9757128198920624] [CTTCCTCC:180:0.9250330832242935]	3#[AGGTCA:216:1.0] [TGACCT:226:1.0] [TGACCC:277:0.8857896050338628]	385	168	31	137.82	16.41	0.04	-	NM_023009	UE	Upstream Enhancer	32574427	17824	MARCKSL1	65108	protein-coding
chr1	32610294	32610697	0#	3#[CTTCCTCA:235:0.9757128198920624] [CTTCCTGT:205:0.8896519339525494] [TCAGGAAG:101:0.8653647538446115]	0#	405	222	38	170.67	16.15	0.03	-	NM_001143890	Body	Gene Body	32632649	-22133	BSDC1	55108	protein-coding
chr1	32844858	32845361	0#	1#[GGAGGAAG:232:0.9250330832242935]	1#[TGACCA:94:0.8180826906887997]	505	254	53	479.16	81.4	0	+	NM_001040441	DE	DownStream Enhancer	32777358	67754	ZBTB8A	653121	protein-coding
chr1	32888363	32888915	0#	4#[CTTCCTCT:336:1.0000000000000002] [CTTCCGCT:418:0.9370344629705614] [CTTCCGCC:377:0.8620675461948546] [TGTGGAAG:17:0.8565942509560106]	1#[TGACCT:488:1.0]	554	423	48	187.32	11.6	0.04	-	NM_178547	PP	Proximal Promoter	32888772	14	ZBTB8OS	339487	protein-coding
chr1	32889395	32889833	0#	0#	0#	440	215	20	113.07	21.47	0.1	+	NM_005610	PP	Proximal Promoter	32889335	275	RBBP4	5928	protein-coding
chr1	32979501	32979824	0#	1#[CTTCCCCT:184:0.9496545689046608]	0#	325	166	23	110.05	13.23	0.1	+	NM_020888	PP	Proximal Promoter	32980098	-431	KIAA1522	57648	protein-coding
chr1	33057051	33057383	0#	2#[GGGGGAAG:28:0.8746876521289542] [TGTGGAAG:318:0.8565942509560106]	0#	334	130	24	125.92	19.03	0.07	-	NM_003680	PP	Proximal Promoter	33056220	961	YARS	8565	protein-coding
chr1	33145707	33146042	1#[CACTTCCTCTTCA:105:0.8022269895621994]	1#[CTTCCTCC:260:0.9250330832242935]	1#[GGGTCA:163:0.8857896050338628]	337	138	19	131.05	29.07	0.06	-	NM_033504	UE	Upstream Enhancer	33139540	6305	TMEM54	113452	protein-coding
chr1	33218823	33219180	0#	3#[AGAGGAAG:116:1.0] [TGAGGAAA:267:0.8667187803472263] [ATTCCTCT:170:0.840598909800833]	0#	359	122	29	151.34	18.78	0.04	-	NM_153341	UE	Upstream Enhancer	33202873	16072	RNF19B	127544	protein-coding
chr1	33219214	33219881	1#[GACTTCCCCTTTC:317:0.8348851426326367]	2#[CTTCCTCC:239:0.9250330832242935] [ACAGGAAG:337:0.8896519339525494]	1#[TGGTCA:175:0.8180826906887997]	669	335	194	1726.33	73.55	0	-	NM_153341	UE	Upstream Enhancer	33202873	16676	RNF19B	127544	protein-coding
chr1	33231196	33231742	0#	2#[CTTCCTCA:314:0.9757128198920624] [TTTCCCCT:80:0.8406605293598248]	1#[TGACCT:142:1.0]	548	314	65	316.53	25.09	0.02	-	NM_153341	UE	Upstream Enhancer	33202873	28637	RNF19B	127544	protein-coding
chr1	33277999	33278536	1#[CAAAAGGGAAGTG:275:0.8444840399370531]	1#[CTTCCTCC:236:0.9250330832242935]	1#[TGACCC:492:0.8857896050338628]	539	286	109	756.52	40.74	0	-	NM_013411	UE	Upstream Enhancer	33275099	3186	AK2	204	protein-coding
chr1	33288687	33289082	0#	1#[CTTCCTGT:186:0.8896519339525494]	1#[TGACCG:336:0.8490319803691448]	397	219	69	389.33	23.08	0.03	-	NM_013411	UE	Upstream Enhancer	33275099	13807	AK2	204	protein-coding
chr1	33326593	33327128	0#	1#[CTTCCTCT:320:1.0000000000000002]	2#[TGACCT:203:1.0] [TGACCA:110:0.8180826906887997]	537	319	39	148.59	15.99	0.04	+	NM_052998	Body	Gene Body	33319300	7612	ADC	113451	protein-coding
chr1	33336570	33336850	0#	2#[TTTCCTCT:134:0.8910059604551641] [AGGGGAAC:237:0.8775610514984932]	0#	282	142	19	120.59	21.27	0.07	+	NM_052998	Body	Gene Body	33319300	17412	ADC	113451	protein-coding
chr1	33365206	33366003	0#	1#[CTTCCTCC:136:0.9250330832242935]	1#[GGGTCA:499:0.8857896050338628]	799	298	118	559.77	22	0	+	NM_052998	DE	DownStream Enhancer	33319300	46204	ADC	113451	protein-coding
chr1	33496481	33496929	1#[GAGAGAGGAAGTG:248:0.8159749523179656]	2#[CTTCCACT:322:0.8808814310639483] [GGAGGAAC:231:0.8529395658181258]	0#	450	250	30	199.34	23.26	0.04	+	NM_152493	Body	Gene Body	33494760	1971	ZNF362	149076	protein-coding
chr1	33573092	33573517	0#	4#[CTTCCTCT:213:1.0000000000000002] [CTTCCTCT:287:1.0000000000000002] [CTTCCCCA:192:0.925367388796723] [CTTCCACT:295:0.8808814310639483]	0#	427	294	45	253.88	21.52	0.03	-	NM_004427	Body	Gene Body	33588086	-14700	PHC2	1912	protein-coding
chr1	33576987	33577476	0#	2#[ACAGGAAG:271:0.8896519339525494] [GGGGGAAG:77:0.8746876521289542]	4#[CGGTCA:140:0.8490319803691448] [TGACCA:117:0.8180826906887997] [TGGTCA:320:0.8180826906887997] [TGACCA:433:0.8180826906887997]	491	292	39	142.05	13.32	0.04	-	NM_004427	Body	Gene Body	33588086	-10807	PHC2	1912	protein-coding
chr1	33588147	33588934	0#	2#[TGAGGAAG:437:0.9757128198920622] [CTTCCCCA:504:0.925367388796723]	3#[GGGTCA:232:0.8857896050338628] [CGGTCA:391:0.8490319803691448] [CGGTCA:476:0.8490319803691448]	789	454	153	979.17	44.73	0	-	NM_004427	PP	Proximal Promoter	33588086	515	PHC2	1912	protein-coding
chr1	33622545	33623027	0#	3#[GTTCCTCT:350:0.9279064825938323] [CTTCCTGT:165:0.8896519339525494] [CTTCTTCT:397:0.8392187832339122]	1#[TGGTCA:29:0.8180826906887997]	484	358	28	155.18	18.9	0.03	-	NM_004427	UE	Upstream Enhancer	33588086	34817	PHC2	1912	protein-coding
chr1	33634850	33635316	0#	2#[TTTCCTCA:409:0.8667187803472263] [TGTGGAAG:60:0.8565942509560106]	1#[CGGTCA:100:0.8490319803691448]	468	224	24	124.16	24.71	0.07	-	NM_004427	UE	Upstream Enhancer	33588086	46988	PHC2	1912	protein-coding
chr1	33599733	33600173	0#	2#[AGAGGAAG:235:1.0] [TGAGGAAA:392:0.8667187803472263]	2#[TGACCT:23:1.0] [CGGTCA:323:0.8490319803691448]	442	244	26	167.02	29.95	0.03	-	NM_198040	Body	Gene Body	33613781	-13804	PHC2	1912	protein-coding
chr1	33671706	33672486	0#	3#[CTTCCCCA:526:0.925367388796723] [CTTCCTGA:278:0.8653647538446115] [TCAGGAAG:345:0.8653647538446115]	2#[GGGTCA:428:0.8857896050338628] [TGACCA:283:0.8180826906887997]	782	509	182	1925.79	107.24	0	+	NM_145238	UE	Upstream Enhancer	33710818	-38603	ZSCAN20	7579	protein-coding
chr1	33676793	33677181	1#[CAGTTCCTCTTTG:235:0.8726843372667749]	0#	0#	390	233	22	121.27	21.27	0.07	+	NM_145238	UE	Upstream Enhancer	33710818	-33792	ZSCAN20	7579	protein-coding
chr1	33681450	33681814	0#	3#[GGAGGAAG:171:0.9250330832242935] [TGGGGAAC:275:0.8532738713905553] [AGAGGAAT:9:0.840598909800833]	0#	366	173	17	110.37	16.61	0.1	+	NM_145238	UE	Upstream Enhancer	33710818	-29195	ZSCAN20	7579	protein-coding
chr1	33699549	33699884	0#	3#[AGAGGAAG:164:1.0] [TGGGGAAG:128:0.925367388796723] [TTTCCTCA:21:0.8667187803472263]	1#[GGGTCA:240:0.8857896050338628]	337	146	32	290.78	41.15	0.04	+	NM_145238	UE	Upstream Enhancer	33710818	-11123	ZSCAN20	7579	protein-coding
chr1	33710644	33710980	0#	2#[TGGGGAAG:318:0.925367388796723] [CTTCCGCC:202:0.8620675461948546]	0#	338	203	28	194.09	35.89	0.04	+	NM_145238	PP	Proximal Promoter	33710818	29	ZSCAN20	7579	protein-coding
chr1	33757173	33758406	1#[AAAAGAGGAAGTG:700:0.9999999999999994]	1#[CTTCCTCC:456:0.9250330832242935]	1#[TGACCT:203:1.0]	1235	717	124	1046.45	80.78	0	-	NM_052896	Body	Gene Body	34404030	-646140	CSMD2	114784	protein-coding
chr1	33758605	33759068	0#	1#[TGTGGAAG:175:0.8565942509560106]	0#	465	183	21	111.22	14.95	0.1	-	NM_052896	Body	Gene Body	34404030	-645242	CSMD2	114784	protein-coding
chr1	33762804	33763153	1#[CACTTCCTCTTCC:131:0.8333154263803636]	0#	2#[TGACCT:310:1.0] [TGACCA:145:0.8180826906887997]	351	171	38	292.67	37.47	0.04	-	NM_052896	Body	Gene Body	34404030	-641055	CSMD2	114784	protein-coding
chr1	33986200	33986576	1#[GGAAGAGGAAGTG:151:0.8333154263803634]	1#[CTTCCTCC:351:0.9250330832242935]	1#[TGACCA:369:0.8180826906887997]	378	152	20	154.89	43.52	0.03	-	NM_052896	Body	Gene Body	34404030	-417678	CSMD2	114784	protein-coding
chr1	35090945	35091258	0#	0#	1#[TGACCT:70:1.0]	315	109	34	140.97	14.13	0.04	-	NM_001164824	Body	Gene Body	35097233	-6179	C1orf212	113444	protein-coding
chr1	35157205	35157807	1#[CACTTCCTCCTTT:312:0.919110366169785]	1#[GGAGGAAG:220:0.9250330832242935]	2#[AGGTCA:547:1.0] [TGACCA:250:0.8180826906887997]	604	306	151	1752.74	125.34	0	-	NM_001080418	UE	Upstream Enhancer	35143571	13940	DLGAP3	58512	protein-coding
chr1	35285692	35286206	0#	2#[CTTCCCCT:296:0.9496545689046608] [GGAGGAAG:128:0.9250330832242935]	1#[TGACCT:223:1.0]	516	302	41	248.45	22.8	0.03	-	NM_007167	UE	Upstream Enhancer	35270156	15838	ZMYM6	9204	protein-coding
chr1	35300275	35301117	1#[AAAAGGGGAAATG:629:0.8370086106136762]	2#[CTTCCTCT:190:1.0000000000000002] [TGGGGAAG:398:0.925367388796723]	0#	844	172	63	558.56	69.12	0	+	NM_024772	UE	Upstream Enhancer	35317558	-17111	ZMYM1	79830	protein-coding
chr1	35440200	35440694	0#	2#[CTTCCTCT:477:1.0000000000000002] [CTTCCTCC:294:0.9250330832242935]	1#[TGGTCA:13:0.8180826906887997]	496	268	76	757.34	81.4	0	-	NM_005066	UE	Upstream Enhancer	35431330	9138	SFPQ	6421	protein-coding
chr1	35629288	35629534	0#	1#[AGGGGAAG:97:0.9496545689046608]	1#[AGGTCA:201:1.0]	248	117	45	555.49	83.72	0	+	NM_005095	Body	Gene Body	35507154	122251	ZMYM4	9202	protein-coding
chr1	35672543	35672908	1#[CACTTCCTCTTTG:80:0.9580159982826505]	1#[AGAGGAAA:339:0.8910059604551641]	0#	367	112	35	263.5	27.69	0.04	-	NM_024874	Body	Gene Body	35795624	-122969	KIAA0319L	79932	protein-coding
chr1	35722757	35722954	1#[CACTTCCCTATTT:126:0.8276960866092257]	0#	1#[TGACCA:106:0.8180826906887997]	199	114	22	237.97	51.2	0.03	-	NM_024874	Body	Gene Body	35795624	-72753	KIAA0319L	79932	protein-coding
chr1	35777230	35777611	0#	1#[CTTCCTCT:113:1.0000000000000002]	1#[AGGTCA:327:1.0]	383	113	45	302.33	31.01	0.02	-	NM_024874	Body	Gene Body	35795624	-18281	KIAA0319L	79932	protein-coding
chr1	35778215	35778469	1#[AAAAGGGGAACTG:78:0.874439686191719]	0#	0#	256	106	31	278.47	34.23	0.04	-	NM_024874	Body	Gene Body	35795624	-17303	KIAA0319L	79932	protein-coding
chr1	36007330	36007846	0#	1#[CTTCCCCA:188:0.925367388796723]	1#[TGACCT:236:1.0]	518	231	36	273.18	42.64	0.04	-	NM_022111	PP	Proximal Promoter	36008138	-577	CLSPN	63967	protein-coding
chr1	36038505	36038833	1#[CACTTCCTGATTT:172:0.8661037851935528]	0#	0#	330	165	24	181.11	33.22	0.04	+	NM_017629	UE	Upstream Enhancer	36046414	-7744	EIF2C4	192670	protein-coding
chr1	36042728	36043016	0#	2#[AGGGGAAG:109:0.9496545689046608] [TGTGGAAG:72:0.8565942509560106]	1#[GGGTCA:126:0.8857896050338628]	290	122	65	571.66	48.05	0	+	NM_017629	UE	Upstream Enhancer	36046414	-3564	EIF2C4	192670	protein-coding
chr1	36125058	36125580	0#	2#[CTTCCCCA:196:0.925367388796723] [CTTCCTGA:351:0.8653647538446115]	2#[TGACCT:345:1.0] [TGACCC:356:0.8857896050338628]	524	396	43	210.17	17.41	0.04	+	NM_012199	Body	Gene Body	36121396	4058	EIF2C1	26523	protein-coding
chr1	36132255	36132782	0#	3#[AGAGGAAG:284:1.0] [AGGGGAAG:121:0.9496545689046608] [AGAGGAAA:153:0.8910059604551641]	0#	529	289	39	126.81	14.08	0.06	+	NM_012199	Body	Gene Body	36121396	11148	EIF2C1	26523	protein-coding
chr1	36326719	36327274	0#	1#[TGCGGAAG:89:0.9127472828626235]	0#	557	316	52	155.2	9.77	0.03	+	NM_017825	PP	Proximal Promoter	36327039	-4	ADPRHL2	54936	protein-coding
chr1	36387588	36388093	0#	3#[CTTCCGCT:448:0.9370344629705614] [CTTCCTCC:343:0.9250330832242935] [ATTCCTCT:396:0.840598909800833]	1#[GGGTCA:329:0.8857896050338628]	507	343	38	191.17	20.35	0.04	-	NM_014408	PP	Proximal Promoter	36387654	277	TRAPPC3	27095	protein-coding
chr1	36399121	36399542	0#	1#[ACAGGAAG:121:0.8896519339525494]	2#[TGACCT:412:1.0] [GGGTCA:96:0.8857896050338628]	423	126	56	377.8	36.67	0.03	+	NM_018067	Body	Gene Body	36394389	4858	MAP7D1	55700	protein-coding
chr1	36400109	36400748	1#[CACTTCCTTCTTC:473:0.8295890722405536]	1#[GGGGGAAG:442:0.8746876521289542]	0#	641	422	44	176.62	13.25	0.04	+	NM_018067	Body	Gene Body	36394389	6142	MAP7D1	55700	protein-coding
chr1	36558557	36558960	2#[TAAAGAGGAAGTG:202:0.9526935748057962] [GAAAGAGGAATTG:184:0.8493435153182937]	0#	1#[TGACCC:177:0.8857896050338628]	405	201	25	138.54	22.72	0.04	+	NM_001162530	Body	Gene Body	36544580	14178	SH3D21	79729	protein-coding
chr1	36567008	36567270	1#[CAAGAAGGAAGTG:104:0.8038230588992432]	0#	0#	264	133	24	118.04	14.58	0.08	-	NM_018166	UE	Upstream Enhancer	36562342	4799	FAM176B	55194	protein-coding
chr1	36611876	36613148	0#	4#[AGAGGAAG:264:1.0] [GGAGGAAG:930:0.9250330832242935] [CGAGGAAG:544:0.8840323149896212] [TTTCCTCA:363:0.8667187803472263]	4#[TGACCT:446:1.0] [TGACCT:571:1.0] [TGACCC:202:0.8857896050338628] [CGGTCA:301:0.8490319803691448]	1274	281	176	970.24	58.79	0	-	NM_032017	Body	Gene Body	36624072	-11915	STK40	83931	protein-coding
chr1	36616061	36616433	0#	2#[GGAGGAAG:110:0.9250330832242935] [ACAGGAAG:130:0.8896519339525494]	2#[AGGTCA:149:1.0] [AGGTCA:243:1.0]	374	143	24	123.34	20.72	0.07	-	NM_032017	Body	Gene Body	36624072	-7868	STK40	83931	protein-coding
chr1	36624567	36625109	0#	1#[GTTCCTCC:160:0.8529395658181256]	2#[GGGTCA:454:0.8857896050338628] [TGACCA:102:0.8180826906887997]	544	168	73	343.96	15.81	0.02	-	NM_032017	PP	Proximal Promoter	36624072	663	STK40	83931	protein-coding
chr1	36684917	36685360	0#	2#[TTTCCTCT:64:0.8910059604551641] [GGGGGAAG:264:0.8746876521289542]	0#	445	234	46	243.56	24.81	0.03	-	NM_145047	Body	Gene Body	36688673	-3522	OSCP1	127700	protein-coding
chr1	36696012	36696377	0#	2#[AGAGGAAG:195:1.0] [CTTCCCCT:33:0.9496545689046608]	0#	367	176	25	125.31	15.86	0.07	-	NM_031280	Body	Gene Body	36702627	-6439	MRPS15	64960	protein-coding
chr1	36749229	36749778	1#[GACTTCCTCTTTT:345:0.891331783801081]	0#	3#[TGACCT:221:1.0] [TGACCT:438:1.0] [TGACCA:249:0.8180826906887997]	551	345	47	326.12	39.71	0.02	-	NM_156039	UE	Upstream Enhancer	36721502	28072	CSF3R	1441	protein-coding
chr1	37274138	37274541	1#[TAAGGAGGAAGTG:244:0.8718039409755814]	1#[CTTCCGCA:351:0.9127472828626235]	0#	405	263	42	195.54	18.73	0.04	-	NM_000831	PP	Proximal Promoter	37272431	1970	GRIK3	2899	protein-coding
chr1	37687759	37688665	1#[CACTTCCTTTTTT:602:0.9266966944468078]	3#[AGAGGAAG:191:1.0] [CTTCCTCC:237:0.9250330832242935] [AGTGGAAG:109:0.8808814310639483]	0#	908	579	179	1357.51	63.35	0	-	NR_038842	DE	DownStream Enhancer	37712631	-24293	LOC728431	728431	miscRNA
chr1	37717428	37718596	0#	9#[CTTCCTCA:749:0.9757128198920624] [CTTCCCCT:441:0.9496545689046608] [AGGGGAAG:891:0.9496545689046608] [AGGGGAAG:915:0.9496545689046608] [AGAGGAAC:134:0.9279064825938323] [GGAGGAAG:1151:0.9250330832242935] [CTTCCCCC:542:0.874687652128954] [CTTCCTGA:279:0.8653647538446115] [TGGGGAAC:380:0.8532738713905553]	3#[TGACCC:88:0.8857896050338628] [CGGTCA:524:0.8490319803691448] [TGACCA:967:0.8180826906887997]	1170	750	104	431.6	15.73	0.03	+	NM_025079	Body	Gene Body	37712705	5473	ZC3H12A	80149	protein-coding
chr1	37724850	37725760	0#	4#[AGGGGAAG:646:0.9496545689046608] [CTTCCCCA:174:0.925367388796723] [CTTCCCCA:390:0.925367388796723] [CTTCCCCC:146:0.874687652128954]	1#[AGGTCA:815:1.0]	912	369	69	291.44	24.47	0.04	+	NM_025079	DE	DownStream Enhancer	37712705	12514	ZC3H12A	80149	protein-coding
chr1	37833699	37834387	0#	4#[CTTCCCCT:170:0.9496545689046608] [CTTCCGCT:440:0.9370344629705614] [CTTCCTCC:206:0.9250330832242935] [CTTCCTGT:473:0.8896519339525494]	0#	690	445	60	285.67	20.86	0.04	-	NM_013285	PP	Proximal Promoter	37834173	-29	GNL2	29889	protein-coding
chr1	38046326	38046652	0#	2#[GGAGGAAG:133:0.9250330832242935] [GGCGGAAG:11:0.8620675461948546]	0#	328	148	46	377.26	38.37	0.03	+	NM_198446	PP	Proximal Promoter	38046059	415	C1orf122	127687	protein-coding
chr1	38090126	38090520	0#	3#[GTTCCTCT:276:0.9279064825938323] [TTTCCTCA:35:0.8667187803472263] [CTTCCACA:224:0.8565942509560106]	1#[GGGTCA:178:0.8857896050338628]	396	283	40	323.8	30.7	0.02	-	NM_005955	Body	Gene Body	38097879	-7470	MTF1	4520	protein-coding
chr1	38097605	38098660	0#	7#[CTTCCCCT:255:0.9496545689046608] [AGGGGAAG:391:0.9496545689046608] [CTTCCCCT:795:0.9496545689046608] [CTTCCCCT:872:0.9496545689046608] [CTTCCGCT:270:0.9370344629705614] [TGGGGAAG:425:0.925367388796723] [GGAGGAAG:288:0.9250330832242935]	2#[TGACCG:547:0.8490319803691448] [TGACCA:81:0.8180826906887997]	1057	270	86	348.9	21.08	0.03	-	NM_005955	PP	Proximal Promoter	38097879	-4	MTF1	4520	protein-coding
chr1	38160987	38161578	0#	2#[AGAGGAAG:343:1.0] [GGAGGAAG:132:0.9250330832242935]	1#[TGACCA:113:0.8180826906887997]	593	331	122	1091.67	64.03	0	-	NM_005540	Body	Gene Body	38185316	-23998	INPP5B	3633	protein-coding
chr1	38168820	38169117	0#	2#[TTTCCTCT:164:0.8910059604551641] [CGAGGAAG:140:0.8840323149896212]	0#	299	145	28	125.97	16.42	0.07	-	NM_005540	Body	Gene Body	38185316	-16351	INPP5B	3633	protein-coding
chr1	38193822	38194209	0#	1#[CTTCCTCT:181:1.0000000000000002]	0#	389	189	22	149.16	31.01	0.04	-	NM_006802	DE	DownStream Enhancer	38228348	-34337	SF3A3	10946	protein-coding
chr1	38227576	38227876	0#	3#[TGAGGAAG:57:0.9757128198920622] [CTTCCCCT:171:0.9496545689046608] [GTTCCCCA:39:0.8532738713905553]	0#	302	176	75	791.25	60.87	0	-	NM_006802	PP	Proximal Promoter	38228348	-596	SF3A3	10946	protein-coding
chr1	39072473	39072746	1#[CAGTTCCTCATTA:206:0.8085899587447436]	2#[AGTGGAAG:119:0.8808814310639483] [GGAGGAAC:180:0.8529395658181258]	0#	275	192	19	147.18	34.88	0.04	-	NM_022157	DE	DownStream Enhancer	39097927	-25262	RRAGC	64121	protein-coding
chr1	39229793	39230237	0#	2#[AGAGGAAG:315:1.0] [CTTCCTCC:373:0.9250330832242935]	0#	446	204	38	300.97	46.67	0.03	+	NM_001136275	PP	Proximal Promoter	39229502	495	AKIRIN1	79647	protein-coding
chr1	39283042	39283365	0#	2#[CTTCCTCA:201:0.9757128198920624] [TCAGGAAG:4:0.8653647538446115]	1#[TGGTCA:73:0.8180826906887997]	325	184	42	347.04	42.83	0.03	+	NM_001184979	DE	DownStream Enhancer	39264553	18673	NDUFS5	4725	protein-coding
chr1	39340969	39341308	0#	3#[GTTCCTCT:219:0.9279064825938323] [CTTCCCCA:280:0.925367388796723] [CTTCCCCC:18:0.874687652128954]	0#	341	169	20	116.83	14.53	0.08	+	NM_012090	Body	Gene Body	39319675	21463	MACF1	23499	protein-coding
chr1	39341365	39341730	0#	2#[CTTCCCCT:109:0.9496545689046608] [TGAGGAAC:166:0.9036193024858946]	0#	367	111	41	300.57	31.4	0.04	+	NM_012090	Body	Gene Body	39319675	21801	MACF1	23499	protein-coding
chr1	39443462	39443810	0#	1#[TTTCCTCA:230:0.8667187803472263]	0#	350	214	47	397.07	49.1	0.03	+	NM_012090	Body	Gene Body	39319675	124001	MACF1	23499	protein-coding
chr1	39453285	39453686	0#	1#[CTTCCTCT:147:1.0000000000000002]	3#[TGACCT:156:1.0] [AGGTCA:175:1.0] [GGGTCA:314:0.8857896050338628]	403	216	63	439.43	33.58	0.03	+	NM_012090	Body	Gene Body	39319675	133826	MACF1	23499	protein-coding
chr1	39469183	39469515	1#[CAAAGAGGAAGTT:92:0.806520030251902]	1#[AGAAGAAG:126:0.839218783233912]	1#[GGGTCA:297:0.8857896050338628]	334	92	25	154.32	23.26	0.03	+	NM_012090	Body	Gene Body	39319675	149600	MACF1	23499	protein-coding
chr1	39548229	39548837	1#[AAAAGAGGAAGTG:216:0.9999999999999994]	0#	0#	610	272	53	477.67	51.16	0	+	NM_012090	Body	Gene Body	39319675	228826	MACF1	23499	protein-coding
chr1	39617478	39617864	1#[AAAAGAGGAAGTC:141:0.8913317838010807]	1#[AGAGGAAG:260:1.0]	0#	388	162	37	289.71	36.09	0.04	+	NM_012090	Body	Gene Body	39319675	297965	MACF1	23499	protein-coding
chr1	39882002	39882214	0#	3#[CTTCCTCT:94:1.0000000000000002] [CTTCCTGT:201:0.8896519339525494] [GTTCCCCT:133:0.8775610514984932]	0#	214	92	20	142.14	21.15	0.04	-	NM_014571	UE	Upstream Enhancer	39877935	4159	HEYL	26508	protein-coding
chr1	40037379	40037797	0#	1#[CTTCCTCT:132:1.0000000000000002]	0#	420	123	65	302.82	15.98	0.02	-	NM_022120	UE	Upstream Enhancer	40009607	27895	OXCT2	64064	protein-coding
chr1	40055624	40056065	0#	2#[AGAGGAAG:205:1.0] [TCAGGAAG:106:0.8653647538446115]	1#[TGACCT:389:1.0]	443	190	42	120.19	8.59	0.07	-	NM_022120	UE	Upstream Enhancer	40009607	46207	OXCT2	64064	protein-coding
chr1	40017465	40017863	0#	1#[GTTCCTCT:146:0.9279064825938323]	1#[TGACCA:95:0.8180826906887997]	400	147	35	199.59	21.32	0.04	-	NM_001720	Body	Gene Body	40027120	-9508	BMP8B	656	protein-coding
chr1	40083842	40084336	0#	3#[TGGGGAAG:184:0.925367388796723] [TGAGGAAC:319:0.9036193024858946] [ACAGGAAG:395:0.8896519339525494]	0#	496	319	65	326.7	19.03	0.02	-	NM_017646	Body	Gene Body	40121764	-37603	TRIT1	54802	protein-coding
chr1	40128453	40128975	0#	2#[CTTCCCCT:272:0.9496545689046608] [CTTCCCCA:436:0.925367388796723]	1#[TGACCC:225:0.8857896050338628]	524	275	63	679.55	98.96	0	-	NM_017646	UE	Upstream Enhancer	40121764	6964	TRIT1	54802	protein-coding
chr1	40174877	40175432	0#	3#[TGAGGAAG:244:0.9757128198920622] [TGAGGAAG:312:0.9757128198920622] [TCAGGAAG:343:0.8653647538446115]	2#[TGACCC:369:0.8857896050338628] [TGACCA:271:0.8180826906887997]	557	335	61	380.08	29.61	0.03	+	NM_001136493	UE	Upstream Enhancer	40193370	-18158	MFSD2A	84879	protein-coding
chr1	40178558	40178912	0#	1#[GGAGGAAG:150:0.9250330832242935]	0#	356	141	25	128.25	15.86	0.07	+	NM_001136493	UE	Upstream Enhancer	40193370	-14671	MFSD2A	84879	protein-coding
chr1	40198768	40199304	0#	2#[TGGGGAAG:320:0.925367388796723] [GTTCCTCA:145:0.9036193024858946]	1#[TGACCT:454:1.0]	538	321	54	195.27	15.64	0.04	+	NM_001136493	Body	Gene Body	40193370	5719	MFSD2A	84879	protein-coding
chr1	40278022	40279135	1#[CAAACAGGAAGTG:267:0.8828917385213799]	3#[AGAGGAAC:613:0.9279064825938323] [GGAGGAAG:185:0.9250330832242935] [AGCGGAAC:713:0.8649409455643936]	5#[TGACCC:339:0.8857896050338628] [TGACCC:358:0.8857896050338628] [TGACCA:237:0.8180826906887997] [TGGTCA:247:0.8180826906887997] [TGGTCA:621:0.8180826906887997]	1115	283	146	690.52	29.35	0	+	NM_001105530	PP	Proximal Promoter	40278841	-536	CAP1	10487	protein-coding
chr1	40303016	40303669	0#	1#[CTTCCACT:284:0.8808814310639483]	0#	655	267	82	424.28	28.42	0.03	+	NM_001105530	Body	Gene Body	40278841	24442	CAP1	10487	protein-coding
chr1	40316871	40317072	0#	3#[CTTCCCCA:152:0.925367388796723] [CTTCCTGT:110:0.8896519339525494] [CTTCCTGA:181:0.8653647538446115]	3#[AGGTCA:72:1.0] [TGACCC:131:0.8857896050338628] [TGACCA:186:0.8180826906887997]	203	106	22	194.94	31.56	0.04	-	NM_001142604	Body	Gene Body	40335729	-18752	PPT1	5538	protein-coding
chr1	40550509	40551192	0#	2#[CTTCCTCT:410:1.0000000000000002] [TGGGGAAG:536:0.925367388796723]	1#[TGACCC:582:0.8857896050338628]	685	419	60	295.37	25.75	0.04	-	NM_001852	Body	Gene Body	40555526	-4598	COL9A2	1298	protein-coding
chr1	40582774	40583164	1#[GATAGAGGAAGTG:246:0.8119386945143581]	0#	0#	392	261	59	498.79	41.02	0	-	NM_001852	UE	Upstream Enhancer	40555526	27509	COL9A2	1298	protein-coding
chr1	40611731	40612220	0#	1#[GGAGGAAG:227:0.9250330832242935]	1#[GGGTCA:334:0.8857896050338628]	491	243	38	123.74	14.53	0.07	+	NM_022733	PP	Proximal Promoter	40611964	10	SMAP2	64744	protein-coding
chr1	40623914	40624552	1#[AACTTCCTCTTTT:183:0.8485040319692515]	1#[ACAGGAAG:467:0.8896519339525494]	0#	640	189	38	151.69	12.09	0.04	+	NM_022733	Body	Gene Body	40611964	12139	SMAP2	64744	protein-coding
chr1	40659585	40660431	1#[CAGTTCCTTTTTT:172:0.8413650334309319]	2#[AGAGGAAC:365:0.9279064825938323] [CTTCCCCC:124:0.874687652128954]	2#[AGGTCA:464:1.0] [TGACCC:651:0.8857896050338628]	848	215	71	252.6	22.19	0.03	+	NM_022733	Body	Gene Body	40611964	47836	SMAP2	64744	protein-coding
chr1	40715046	40715542	0#	1#[TGAGGAAA:331:0.8667187803472263]	0#	498	319	23	157.04	21.8	0.03	+	NM_198494	PP	Proximal Promoter	40715888	-523	ZNF642	339559	protein-coding
chr1	40769671	40770142	0#	2#[AGAGGAAG:101:1.0] [CTTCCGCA:218:0.9127472828626235]	0#	473	230	60	494.83	41.34	0	+	NM_152373	PP	Proximal Promoter	40769819	82	ZNF684	127396	protein-coding
chr1	40771224	40771548	0#	1#[CTTCCCCA:155:0.925367388796723]	1#[TGGTCA:286:0.8180826906887997]	326	126	17	126.56	20.93	0.07	+	NM_152373	Body	Gene Body	40769819	1531	ZNF684	127396	protein-coding
chr1	40929631	40930464	0#	5#[CTTCCTCG:588:0.8840323149896212] [GGGGGAAG:307:0.8746876521289542] [CTTCCCCC:400:0.874687652128954] [GGCGGAAG:730:0.8620675461948546] [AGGGGAAA:320:0.8406605293598248]	2#[AGGTCA:105:1.0] [GGGTCA:146:0.8857896050338628]	835	336	147	760.59	38.37	0	+	NM_014223	PP	Proximal Promoter	40929828	139	NFYC	4802	protein-coding
chr1	40947220	40947722	1#[AAAACAGGAAGTG:226:0.9248757402387296]	2#[AGTGGAAG:381:0.8808814310639483] [GTTCCCCA:169:0.8532738713905553]	2#[TGACCC:195:0.8857896050338628] [GGGTCA:436:0.8857896050338628]	504	264	69	556.02	50.4	0	+	NM_014223	Body	Gene Body	40929828	17656	NFYC	4802	protein-coding
chr1	40951208	40951795	1#[GACTTCCTTTTTT:233:0.8180284782478887]	1#[CTTCCTCT:304:1.0000000000000002]	2#[TGGTCA:318:0.8180826906887997] [TGGTCA:461:0.8180826906887997]	589	309	96	1013.13	98.39	0	+	NM_014223	Body	Gene Body	40929828	21689	NFYC	4802	protein-coding
chr1	41063607	41064081	0#	3#[AGGGGAAG:246:0.9496545689046608] [GGAGGAAG:5:0.9250330832242935] [ACAGGAAG:196:0.8896519339525494]	0#	476	212	56	208.92	14.3	0.04	+	NM_004700	Body	Gene Body	41022270	41549	KCNQ4	9132	protein-coding
chr1	41088288	41088809	1#[GACTTCCTCTTTT:355:0.891331783801081]	0#	4#[TGACCT:349:1.0] [GGGTCA:283:0.8857896050338628] [TGACCC:291:0.8857896050338628] [TGACCA:380:0.8180826906887997]	523	357	34	110.07	11.49	0.1	+	NM_004700	DE	DownStream Enhancer	41022270	66375	KCNQ4	9132	protein-coding
chr1	41128856	41129384	0#	2#[AGAGGAAG:130:1.0] [CTTCCCCA:158:0.925367388796723]	2#[GGGTCA:3:0.8857896050338628] [GGGTCA:145:0.8857896050338628]	530	367	41	209.27	20.35	0.04	-	NM_133467	UE	Upstream Enhancer	41100605	28618	CITED4	163732	protein-coding
chr1	41210244	41210606	1#[AAAAAAGGAAGTC:170:0.8180284782478886]	0#	3#[TGACCT:202:1.0] [GGGTCA:99:0.8857896050338628] [TGGTCA:0:0.8180826906887997]	364	180	17	112.08	21.16	0.1	+	NM_001905	UE	Upstream Enhancer	41217593	-7169	CTPS1	1503	protein-coding
chr1	41210620	41210959	0#	2#[TGAGGAAG:177:0.9757128198920622] [TGGGGAAG:53:0.925367388796723]	1#[GGGTCA:158:0.8857896050338628]	341	169	25	204.81	36.61	0.03	+	NM_001905	UE	Upstream Enhancer	41217593	-6804	CTPS1	1503	protein-coding
chr1	41241880	41242436	0#	1#[CTTCCTCA:347:0.9757128198920624]	0#	558	108	54	212.18	12.98	0.04	+	NM_001905	Body	Gene Body	41217593	24395	CTPS1	1503	protein-coding
chr1	41271559	41271929	1#[GAGAGAGGAAGTG:192:0.8159749523179656]	0#	2#[TGACCT:70:1.0] [TGACCT:125:1.0]	372	214	23	125.9	23.26	0.07	+	NR_037868	Body	Gene Body	41252848	18925	SLFNL1-AS1	100507178	miscRNA
chr1	41279894	41280229	0#	2#[CTTCCTCT:186:1.0000000000000002] [AGAGGAAC:199:0.9279064825938323]	0#	337	189	24	145.13	26.12	0.04	+	NR_037868	Body	Gene Body	41252848	27235	SLFNL1-AS1	100507178	miscRNA
chr1	41291533	41292033	1#[CACTTCCTGTTTC:130:0.9086577518626905]	1#[TGAGGAAG:179:0.9757128198920622]	0#	502	134	86	561.54	33.08	0	+	NR_039970	PP	Proximal Promoter	41292368	-701	MIR5095	100616458	miscRNA
chr1	41342052	41342535	1#[CACTTCCCCATTT:122:0.900999392162418]	0#	1#[TGACCA:234:0.8180826906887997]	485	152	35	313.78	43.52	0.02	+	NR_039970	Body	Gene Body	41292368	49836	MIR5095	100616458	miscRNA
chr1	41365914	41366190	0#	2#[AGAGGAAG:107:1.0] [CTTCCTCC:121:0.9250330832242935]	0#	278	105	16	133.45	30.72	0.05	+	NR_039970	Body	Gene Body	41292368	73651	MIR5095	100616458	miscRNA
chr1	41479027	41479412	1#[GAAAGTGGAAGTG:203:0.8890613356729083]	1#[TGAGGAAG:18:0.9757128198920622]	1#[AGGTCA:53:1.0]	387	201	31	187.54	25.88	0.04	+	NR_039970	Body	Gene Body	41292368	186860	MIR5095	100616458	miscRNA
chr1	41512923	41513598	0#	2#[CTTCCTCA:328:0.9757128198920624] [TTTCCCCT:151:0.8406605293598248]	1#[TGACCA:636:0.8180826906887997]	677	422	78	397.52	21.2	0.03	-	NM_001172218	UE	Upstream Enhancer	41480402	32943	SCMH1	22955	protein-coding
chr1	41515404	41516250	1#[AAATGAGGAAGTG:394:0.9412280449548224]	3#[CTTCCCCA:513:0.925367388796723] [CTTCCTCG:247:0.8840323149896212] [AGAGGAAT:752:0.840598909800833]	1#[AGGTCA:673:1.0]	848	415	113	887.71	75.58	0	-	NM_001172218	UE	Upstream Enhancer	41480402	35417	SCMH1	22955	protein-coding
chr1	41529019	41529429	0#	2#[CTTCCCCT:182:0.9496545689046608] [CTTCCCCT:202:0.9496545689046608]	3#[TGACCA:169:0.8180826906887997] [TGACCA:176:0.8180826906887997] [TGACCA:294:0.8180826906887997]	412	213	35	168.79	18.36	0.03	-	NM_001172218	UE	Upstream Enhancer	41480402	48830	SCMH1	22955	protein-coding
chr1	41715489	41715828	0#	2#[AGGGGAAG:150:0.9496545689046608] [CTTCCTGT:134:0.8896519339525494]	1#[TGACCT:174:1.0]	341	157	41	331.42	37.47	0.02	-	NM_001956	DE	DownStream Enhancer	41722931	-7285	EDN2	1907	protein-coding
chr1	41759578	41760062	0#	3#[CTTCCCCT:185:0.9496545689046608] [AGGGGAAG:220:0.9496545689046608] [AGAGGAAA:361:0.8910059604551641]	0#	486	215	47	272.05	24.49	0.04	-	NM_024503	Body	Gene Body	42156965	-397172	HIVEP3	59269	protein-coding
chr1	41818738	41819746	0#	6#[AGAGGAAG:740:1.0] [GGAGGAAG:645:0.9250330832242935] [GGAGGAAG:770:0.9250330832242935] [GTTCCTCA:237:0.9036193024858946] [CTTCCTGT:503:0.8896519339525494] [CTTCCCCC:35:0.874687652128954]	1#[TGACCA:288:0.8180826906887997]	1010	498	130	539.6	16.47	0	-	NM_024503	Body	Gene Body	42156965	-337729	HIVEP3	59269	protein-coding
chr1	41849287	41850163	1#[CACTTCCCCATTT:591:0.900999392162418]	1#[TGAGGAAA:224:0.8667187803472263]	2#[AGGTCA:109:1.0] [TGACCC:59:0.8857896050338628]	878	587	209	1832.02	93.02	0	-	NM_024503	Body	Gene Body	42156965	-307091	HIVEP3	59269	protein-coding
chr1	41875753	41876009	0#	1#[CTTCCTCT:97:1.0000000000000002]	1#[TGACCA:34:0.8180826906887997]	258	103	16	131.99	30.23	0.05	-	NM_024503	Body	Gene Body	42156965	-281109	HIVEP3	59269	protein-coding
chr1	41896550	41897103	0#	2#[GGAGGAAG:336:0.9250330832242935] [GTTCCTCA:201:0.9036193024858946]	1#[TGACCA:75:0.8180826906887997]	555	217	67	241.64	19.36	0.03	-	NM_024503	Body	Gene Body	42156965	-260198	HIVEP3	59269	protein-coding
chr1	41921084	41921500	0#	1#[AGAGGAAG:214:1.0]	1#[AGGTCA:126:1.0]	418	229	31	156.35	16.07	0.03	-	NM_024503	Body	Gene Body	42156965	-235652	HIVEP3	59269	protein-coding
chr1	41922044	41922832	0#	3#[AGAGGAAG:447:1.0] [AGGGGAAG:323:0.9496545689046608] [GGAGGAAC:132:0.8529395658181258]	7#[TGACCT:269:1.0] [AGGTCA:490:1.0] [TGACCT:555:1.0] [TGACCC:115:0.8857896050338628] [GGGTCA:342:0.8857896050338628] [GGGTCA:684:0.8857896050338628] [TGACCA:592:0.8180826906887997]	790	463	134	722.58	26.54	0	-	NM_024503	Body	Gene Body	42156965	-234458	HIVEP3	59269	protein-coding
chr1	41965299	41966214	0#	5#[AGAGGAAG:534:1.0] [CTTCCCCA:280:0.925367388796723] [CTTCCTCC:177:0.9250330832242935] [TTTCCTCT:589:0.8910059604551641] [CTTCCTGT:317:0.8896519339525494]	3#[TGACCC:328:0.8857896050338628] [GGGTCA:769:0.8857896050338628] [TGACCA:628:0.8180826906887997]	917	514	122	544	22.24	0	-	NM_024503	Body	Gene Body	42156965	-191152	HIVEP3	59269	protein-coding
chr1	41977213	41977799	0#	1#[AGAGGAAC:465:0.9279064825938323]	4#[AGGTCA:278:1.0] [AGGTCA:383:1.0] [GGGTCA:445:0.8857896050338628] [TGACCG:499:0.8490319803691448]	588	362	33	117.72	11.11	0.08	-	NM_024503	Body	Gene Body	42156965	-179390	HIVEP3	59269	protein-coding
chr1	41978293	41979911	1#[CACTTCCTCCTTC:624:0.9028923777937458]	8#[CTTCCTCT:1495:1.0000000000000002] [AGGGGAAG:1172:0.9496545689046608] [CTTCCCCT:1180:0.9496545689046608] [TGGGGAAG:500:0.925367388796723] [CTTCCTCC:1224:0.9250330832242935] [GGAGGAAC:859:0.8529395658181258] [GGAGGAAC:1121:0.8529395658181258] [GGAGGAAC:1289:0.8529395658181258]	3#[TGACCC:786:0.8857896050338628] [TGACCC:1391:0.8857896050338628] [TGACCA:217:0.8180826906887997]	1620	1129	142	571.65	20.52	0	-	NM_024503	Body	Gene Body	42156965	-177543	HIVEP3	59269	protein-coding
chr1	41989324	41990097	0#	3#[AGAGGAAG:304:1.0] [CTTCCCCT:416:0.9496545689046608] [TTTCCCCT:545:0.8406605293598248]	3#[TGACCG:40:0.8490319803691448] [TGACCA:592:0.8180826906887997] [TGACCA:733:0.8180826906887997]	775	340	115	729.53	30.52	0	-	NM_024503	Body	Gene Body	42156965	-167301	HIVEP3	59269	protein-coding
chr1	42003362	42003835	0#	1#[CTTCCTCA:141:0.9757128198920624]	0#	475	148	39	186.02	16.61	0.04	-	NM_024503	Body	Gene Body	42156965	-153455	HIVEP3	59269	protein-coding
chr1	42004652	42005442	0#	3#[CTTCCTCT:659:1.0000000000000002] [TGAGGAAA:169:0.8667187803472263] [TGTGGAAG:434:0.8565942509560106]	0#	792	154	36	126.69	9.51	0.06	-	NM_024503	Body	Gene Body	42156965	-152159	HIVEP3	59269	protein-coding
chr1	42006679	42007385	0#	4#[AGAGGAAG:335:1.0] [AGAGGAAC:232:0.9279064825938323] [AGAGGAAC:277:0.9279064825938323] [GTTCCTCA:475:0.9036193024858946]	1#[TGGTCA:322:0.8180826906887997]	708	288	157	1153.39	62.06	0	-	NM_024503	Body	Gene Body	42156965	-149998	HIVEP3	59269	protein-coding
chr1	42040950	42041534	0#	3#[GTTCCTCT:321:0.9279064825938323] [CTTCCTCC:83:0.9250330832242935] [CTTCCTGA:552:0.8653647538446115]	1#[TGACCT:163:1.0]	586	358	85	537.32	31.98	0	-	NM_024503	Body	Gene Body	42156965	-115657	HIVEP3	59269	protein-coding
chr1	42049642	42049990	0#	0#	0#	350	189	31	224.57	24.42	0.03	-	NM_024503	Body	Gene Body	42156965	-107134	HIVEP3	59269	protein-coding
chr1	42089828	42090262	0#	2#[AGAGGAAG:192:1.0] [CTTCCTGT:81:0.8896519339525494]	0#	436	208	35	116.24	16.34	0.08	-	NM_024503	Body	Gene Body	42156965	-66929	HIVEP3	59269	protein-coding
chr1	42145133	42146156	1#[AAAAGAGGAAGTG:267:0.9999999999999994]	2#[AGAGGAAG:455:1.0] [ACAGGAAG:774:0.8896519339525494]	2#[AGGTCA:315:1.0] [TGACCC:171:0.8857896050338628]	1025	291	102	767.22	59.59	0	-	NM_024503	Body	Gene Body	42156965	-11541	HIVEP3	59269	protein-coding
chr1	42219496	42219943	0#	1#[GGAGGAAG:193:0.9250330832242935]	2#[TGACCT:309:1.0] [GGGTCA:153:0.8857896050338628]	449	210	44	337.21	36.34	0.02	-	NR_038261	Body	Gene Body	42274183	-54477	HIVEP3	59269	protein-coding
chr1	42381563	42381898	0#	2#[CTTCCTCT:190:1.0000000000000002] [AGGGGAAA:122:0.8406605293598248]	0#	337	176	29	215.42	27.28	0.04	+	NM_007102	UE	Upstream Enhancer	42391678	-9939	GUCA2B	2981	protein-coding
chr1	42406377	42407022	1#[GAAAGAGGAAGTG:341:0.9837820116239603]	2#[GTTCCCCA:444:0.8532738713905553] [TTTCCCCT:186:0.8406605293598248]	1#[TGACCT:402:1.0]	647	353	105	789.69	63.51	0	-	NM_033553	UE	Upstream Enhancer	42402982	3748	GUCA2A	2980	protein-coding
chr1	42452597	42453067	1#[CACTTCCTGTTTG:169:0.8828917385213803]	1#[GGAGGAAC:409:0.8529395658181258]	0#	472	177	35	233.83	23.26	0.03	-	NM_001198851	Body	Gene Body	42573223	-120449	FOXJ3	22887	protein-coding
chr1	42675324	42675726	1#[GAAACAGGAAGTG:179:0.90865775186269]	1#[AGAGGAAT:46:0.840598909800833]	1#[AGGTCA:113:1.0]	404	198	40	239.09	30.07	0.03	-	NM_032257	Body	Gene Body	42694525	-19003	ZMYND12	84217	protein-coding
chr1	42694638	42695408	0#	1#[CTTCCCCT:452:0.9496545689046608]	0#	772	574	46	173.38	21.54	0.03	+	NM_024664	PP	Proximal Promoter	42694759	453	PPCS	79717	protein-coding
chr1	42850554	42850810	0#	2#[AGAGGAAG:43:1.0] [CTTCCTCC:152:0.9250330832242935]	1#[TGACCA:189:0.8180826906887997]	258	156	25	154.52	23	0.03	+	NM_001080850	Body	Gene Body	42773146	77564	CCDC30	728621	protein-coding
chr1	42921248	42921573	0#	1#[CTTCCCCT:137:0.9496545689046608]	0#	327	133	25	180.64	29.48	0.04	+	NM_004559	PP	Proximal Promoter	42920652	729	YBX1	4904	protein-coding
chr1	43247582	43247938	1#[AAAAGAGGAAGTT:203:0.8485040319692513]	0#	0#	358	202	21	117.97	15.26	0.08	+	NR_033967	DE	DownStream Enhancer	43197306	50478	SLC2A1-AS1	440584	miscRNA
chr1	43169403	43169874	0#	2#[CTTCCCCT:284:0.9496545689046608] [TTTCCCCT:124:0.8406605293598248]	0#	473	296	48	205.96	16.5	0.03	-	NM_006516	Body	Gene Body	43197434	-27735	SLC2A1	6513	protein-coding
chr1	43170005	43170558	0#	2#[GGAGGAAG:213:0.9250330832242935] [GTTCCCCA:349:0.8532738713905553]	1#[TGACCG:267:0.8490319803691448]	555	244	44	159.96	17.44	0.03	-	NM_006516	Body	Gene Body	43197434	-27185	SLC2A1	6513	protein-coding
chr1	43173450	43173926	1#[CACTTCCCCTTTG:242:0.9177873454902454]	1#[GGAGGAAC:421:0.8529395658181258]	0#	478	233	32	124.76	15.61	0.07	-	NM_006516	Body	Gene Body	43197434	-23751	SLC2A1	6513	protein-coding
chr1	43182258	43183115	1#[AAATGAGGAAGTC:345:0.8325598287559036]	1#[AGAGGAAG:683:1.0]	1#[TGACCC:775:0.8857896050338628]	859	356	133	685.6	29.97	0	-	NM_006516	Body	Gene Body	43197434	-14820	SLC2A1	6513	protein-coding
chr1	43246809	43247503	0#	4#[AGAGGAAC:471:0.9279064825938323] [GGAGGAAG:404:0.9250330832242935] [CTTCCCCC:55:0.874687652128954] [GTTCCTCC:73:0.8529395658181256]	3#[GGGTCA:389:0.8857896050338628] [TGACCA:479:0.8180826906887997] [TGGTCA:606:0.8180826906887997]	696	453	56	324.68	31.4	0.02	-	NM_006516	UE	Upstream Enhancer	43197434	49828	SLC2A1	6513	protein-coding
chr1	43410357	43410700	0#	2#[CTTCCGCT:207:0.9370344629705614] [ACAGGAAG:45:0.8896519339525494]	1#[TGACCC:334:0.8857896050338628]	345	204	38	205.69	17.44	0.03	-	NM_006824	PP	Proximal Promoter	43410573	-12	EBNA1BP2	10969	protein-coding
chr1	43477725	43478134	0#	2#[AGAGGAAG:159:1.0] [CTTCCCCC:326:0.874687652128954]	1#[TGACCA:150:0.8180826906887997]	411	174	34	185.16	23.9	0.04	+	NM_001195831	Body	Gene Body	43410587	67312	WDR65	149465	protein-coding
chr1	43512613	43513088	2#[CACTTCCTGCTTC:229:0.8277681180324756] [CACTTCCTGCTTG:124:0.8020021046911654]	2#[AGGGGAAG:414:0.9496545689046608] [ACGGGAAG:202:0.83930650285721]	1#[AGGTCA:371:1.0]	477	180	34	122.63	11.63	0.07	+	NM_144626	DE	DownStream Enhancer	43508251	4542	TMEM125	128218	protein-coding
chr1	43606086	43607102	0#	1#[CTTCCTCA:173:0.9757128198920624]	0#	1018	146	130	771.92	38.76	0	-	NM_001256399	PP	Proximal Promoter	43605996	236	ELOVL1	64834	protein-coding
chr1	43619727	43620178	0#	0#	0#	453	204	26	132.6	20.67	0.05	-	NM_052877	DE	DownStream Enhancer	43628070	-8139	MED8	112950	protein-coding
chr1	43627724	43628257	1#[CACTTCCGGTTTT:328:0.8434601969872803]	0#	2#[AGGTCA:442:1.0] [GGGTCA:449:0.8857896050338628]	535	331	40	148.77	16.59	0.03	-	NM_052877	PP	Proximal Promoter	43628070	-15	MED8	112950	protein-coding
chr1	43714396	43714572	1#[GAATGAGGAAGTG:21:0.9250100565787833]	2#[TTTCCTCT:160:0.8910059604551641] [TGGGGAAN:14:0.860269255310689]	0#	178	97	14	121.22	23.26	0.07	-	NM_001190880	UE	Upstream Enhancer	43692247	22246	HYI	81888	protein-coding
chr1	43892237	43892515	0#	0#	0#	280	125	51	520.22	53.78	0	+	NM_014663	Body	Gene Body	43888383	3979	KDM4A	9682	protein-coding
chr1	44004696	44005544	1#[ATAAGAGGAAGTG:422:0.832103513116942]	2#[TGAGGAAG:18:0.9757128198920622] [GGCGGAAG:577:0.8620675461948546]	0#	850	445	90	602.03	45.03	0	+	NR_073016	Body	Gene Body	43945790	59351	ST3GAL3	6487	protein-coding
chr1	44017462	44017933	1#[CACTTCCTCATTA:240:0.8939216197606191]	0#	0#	473	256	44	337.06	50.49	0.02	+	NR_073016	Body	Gene Body	43945790	71928	ST3GAL3	6487	protein-coding
chr1	44039456	44039886	1#[AAAAAAGGAAGTG:128:0.9266966944468076]	0#	1#[NGGTCA:140:0.9121519442245171]	432	159	42	227.3	22.6	0.03	+	NR_073016	Body	Gene Body	43945790	93825	ST3GAL3	6487	protein-coding
chr1	44051722	44052115	0#	1#[TGAGGAAA:32:0.8667187803472263]	0#	395	235	92	1117.87	130.59	0	+	NR_073016	Body	Gene Body	43945790	106167	ST3GAL3	6487	protein-coding
chr1	44071843	44072245	0#	1#[AGGGGAAG:129:0.9496545689046608]	0#	404	185	34	140.97	13.42	0.04	+	NR_073016	Body	Gene Body	43945790	126238	ST3GAL3	6487	protein-coding
chr1	44072408	44073641	0#	5#[TGGGGAAG:686:0.925367388796723] [TTTCCTCT:881:0.8910059604551641] [CTTCCTGT:237:0.8896519339525494] [AGTGGAAG:832:0.8808814310639483] [CTTCCCCG:148:0.8336868838942818]	4#[TGACCT:316:1.0] [TGACCC:777:0.8857896050338628] [TGACCG:1139:0.8490319803691448] [TGACCA:423:0.8180826906887997]	1235	254	84	166.63	8.62	0.03	+	NR_073016	Body	Gene Body	43945790	126872	ST3GAL3	6487	protein-coding
chr1	44080157	44080526	0#	3#[GTTCCTCA:200:0.9036193024858946] [CTTCCTGT:315:0.8896519339525494] [CTTCCACA:110:0.8565942509560106]	1#[TGACCT:175:1.0]	371	147	19	121	20.63	0.07	+	NR_073016	Body	Gene Body	43945790	134514	ST3GAL3	6487	protein-coding
chr1	44091648	44092250	0#	3#[CTTCCTCT:144:1.0000000000000002] [AGAGGAAA:268:0.8910059604551641] [TGAGGAAA:33:0.8667187803472263]	1#[AGGTCA:73:1.0]	604	162	48	147.06	13.29	0.04	+	NR_073016	Body	Gene Body	43945790	146020	ST3GAL3	6487	protein-coding
chr1	44116695	44117096	0#	3#[AGAGGAAG:198:1.0] [TGAGGAAG:87:0.9757128198920622] [AGAGGAAA:107:0.8910059604551641]	0#	403	201	34	185.16	21.56	0.04	+	NR_073016	Body	Gene Body	43945790	171106	ST3GAL3	6487	protein-coding
chr1	44119628	44120057	0#	3#[CTTCCTCT:187:1.0000000000000002] [CTTCCTGA:104:0.8653647538446115] [GTTCCCCA:167:0.8532738713905553]	1#[TGGTCA:29:0.8180826906887997]	431	182	47	306.6	34.08	0.02	+	NR_073016	Body	Gene Body	43945790	174020	ST3GAL3	6487	protein-coding
chr1	44213026	44214279	0#	5#[CTTCCGCT:1061:0.9370344629705614] [GTTCCTCT:669:0.9279064825938323] [AGCGGAAC:724:0.8649409455643936] [AGAGGAAT:878:0.840598909800833] [CGGGGAAG:404:0.8336868838942818]	4#[GGGTCA:132:0.8857896050338628] [TGACCG:634:0.8490319803691448] [CGGTCA:647:0.8490319803691448] [CGGTCA:1206:0.8490319803691448]	1255	676	145	672.31	33.05	0	+	NM_001039457	PP	Proximal Promoter	44213188	514	ATP6V0B	533	protein-coding
chr1	44286515	44286831	0#	1#[CTTCCTCC:123:0.9250330832242935]	0#	318	125	24	183.24	36.34	0.04	-	NM_201649	UE	Upstream Enhancer	44255599	31041	SLC6A9	6536	protein-coding
chr1	44295593	44295959	0#	2#[TGAGGAAG:143:0.9757128198920622] [TGAGGAAA:262:0.8667187803472263]	0#	368	166	24	145.13	29.95	0.04	-	NM_201649	UE	Upstream Enhancer	44255599	40160	SLC6A9	6536	protein-coding
chr1	44306584	44307522	1#[CACTTCCTCATTC:470:0.9250100565787834]	2#[CTTCCCCT:211:0.9496545689046608] [ACAGGAAG:354:0.8896519339525494]	5#[GGGTCA:395:0.8857896050338628] [TGACCC:563:0.8857896050338628] [GGGTCA:594:0.8857896050338628] [GGGTCA:692:0.8857896050338628] [TGACCC:703:0.8857896050338628]	940	472	152	1305.7	91.86	0	-	NM_001024845	UE	Upstream Enhancer	44269751	37305	SLC6A9	6536	protein-coding
chr1	44514061	44514436	0#	4#[AGAGGAAG:244:1.0] [CTTCCCCA:34:0.925367388796723] [CTTCCACT:188:0.8808814310639483] [GGGGGAAG:266:0.8746876521289542]	0#	377	276	56	550.54	68.11	0	-	NM_024066	Body	Gene Body	44593526	-79189	ERI3	79033	protein-coding
chr1	44542890	44543369	1#[AAAAAAGGAAGTC:244:0.8180284782478886]	0#	2#[AGGTCA:469:1.0] [TGACCG:46:0.8490319803691448]	481	272	28	151.62	20.97	0.04	-	NM_024066	Body	Gene Body	44593526	-50364	ERI3	79033	protein-coding
chr1	44548256	44548724	1#[AGAAGAGGAAGTG:195:0.8495334147564026]	0#	1#[TGACCA:173:0.8180826906887997]	470	201	47	349.84	42.35	0.03	-	NM_024066	Body	Gene Body	44593526	-45069	ERI3	79033	protein-coding
chr1	44723883	44724291	0#	2#[AGGGGAAC:256:0.8775610514984932] [GTTCCCCT:280:0.8775610514984932]	0#	410	241	40	255.83	29.6	0.04	+	NM_018150	Body	Gene Body	44643546	80578	RNF220	55182	protein-coding
chr1	44910264	44911368	0#	2#[AGAGGAAG:296:1.0] [ACAGGAAG:499:0.8896519339525494]	0#	1106	539	209	1410.53	63.95	0	-	NM_024587	Body	Gene Body	44912686	-1883	TMEM53	79639	protein-coding
chr1	44914751	44915169	0#	2#[TGAGGAAG:255:0.9757128198920622] [AGGGGAAA:389:0.8406605293598248]	2#[TGACCT:178:1.0] [AGGTCA:219:1.0]	420	240	47	219.32	20.76	0.04	+	NM_001145636	Body	Gene Body	44912980	2011	C1orf228	339541	protein-coding
chr1	44922704	44923257	0#	3#[AGAGGAAG:325:1.0] [AGAGGAAA:85:0.8910059604551641] [CTTCCCCC:456:0.874687652128954]	3#[TGACCT:153:1.0] [AGGTCA:198:1.0] [TGACCT:240:1.0]	555	350	59	164.57	13.29	0.03	+	NM_001145636	Body	Gene Body	44912980	10074	C1orf228	339541	protein-coding
chr1	44934934	44935493	0#	2#[CTTCCCCT:274:0.9496545689046608] [CTTCCCCC:247:0.874687652128954]	1#[TGACCC:117:0.8857896050338628]	561	273	101	673.34	45.66	0	+	NM_001145636	Body	Gene Body	44912980	22227	C1orf228	339541	protein-coding
chr1	44953190	44953519	0#	0#	0#	331	211	48	281.27	20.53	0.04	+	NM_001145636	Body	Gene Body	44912980	40421	C1orf228	339541	protein-coding
chr1	44961311	44962525	1#[AAATGGGGAAGTG:524:0.9009993921624174]	6#[CTTCCCCT:657:0.9496545689046608] [CTTCCTCC:874:0.9250330832242935] [CTTCCGCA:1061:0.9127472828626235] [CTTCCTCG:1013:0.8840323149896212] [CTTCCACA:182:0.8565942509560106] [CTTCCCGT:739:0.83930650285721]	1#[CGGTCA:1151:0.8490319803691448]	1216	543	212	1116.4	43.12	0	+	NM_001145636	Body	Gene Body	44912980	48874	C1orf228	339541	protein-coding
chr1	44967540	44967852	0#	1#[TTTCCTCT:238:0.8910059604551641]	0#	314	177	69	556.02	37.97	0	+	NM_001145636	DE	DownStream Enhancer	44912980	54737	C1orf228	339541	protein-coding
chr1	45045431	45046332	0#	4#[CTTCCTCA:737:0.9757128198920624] [CTTCCTCC:94:0.9250330832242935] [ACAGGAAG:638:0.8896519339525494] [AGGGGAAA:234:0.8406605293598248]	3#[TGACCT:850:1.0] [TGACCC:860:0.8857896050338628] [TGGTCA:469:0.8180826906887997]	903	748	123	600.88	26.53	0	-	NM_001013632	PP	Proximal Promoter	45045544	635	TCTEX1D4	343521	protein-coding
chr1	45058062	45058635	0#	2#[CTTCCGCT:203:0.9370344629705614] [CGGGGAAG:441:0.8336868838942818]	2#[GGGTCA:453:0.8857896050338628] [TGACCA:30:0.8180826906887997]	575	227	42	202.07	21.01	0.03	-	NM_001166292	Body	Gene Body	45081203	-22914	PTCH2	8643	protein-coding
chr1	45064657	45065272	0#	3#[AGAGGAAG:209:1.0] [AGGGGAAG:382:0.9496545689046608] [AGGGGAAC:332:0.8775610514984932]	1#[GGGTCA:596:0.8857896050338628]	617	383	35	112.82	9.3	0.1	-	NM_003738	Body	Gene Body	45081203	-16163	PTCH2	8643	protein-coding
chr1	45074131	45074440	0#	1#[CTTCCTCC:203:0.9250330832242935]	0#	311	216	20	147.91	29.07	0.04	-	NM_003738	Body	Gene Body	45081203	-6856	PTCH2	8643	protein-coding
chr1	45224421	45225185	0#	3#[AGGGGAAG:537:0.9496545689046608] [TTTCCTCA:704:0.8667187803472263] [GTTCCTCC:126:0.8529395658181256]	1#[GGGTCA:333:0.8857896050338628]	766	547	55	172.39	12.72	0.03	-	NM_001166588	PP	Proximal Promoter	45224981	-13	EIF2B3	8891	protein-coding
chr1	45591992	45592326	1#[CAAAGAGGAACTG:187:0.8726843372667745]	1#[CTTCCTCT:105:1.0000000000000002]	2#[GGGTCA:237:0.8857896050338628] [TGGTCA:134:0.8180826906887997]	336	208	30	266.29	46.88	0.04	-	NM_007170	Body	Gene Body	45729427	-137227	TESK2	10420	protein-coding
chr1	45763268	45763610	1#[GAATGAGGAAGTG:198:0.9250100565787833]	1#[CTTCCTCT:4:1.0000000000000002]	0#	344	210	56	617.65	80	0	-	NM_181696	UE	Upstream Enhancer	45760197	3281	PRDX1	5052	protein-coding
chr1	45782003	45782576	0#	4#[CTTCCTCC:314:0.9250330832242935] [CTTCCCCC:323:0.874687652128954] [AGGGGAAA:231:0.8406605293598248] [ATTCCTCT:17:0.840598909800833]	1#[TGGTCA:122:0.8180826906887997]	575	301	97	722.01	48.47	0	+	NM_001202414	UE	Upstream Enhancer	45789041	-6737	AKR1A1	10327	protein-coding
chr1	45789999	45790302	0#	1#[CTTCCTCA:148:0.9757128198920624]	0#	305	165	28	237.16	39.38	0.03	+	NM_001202414	Body	Gene Body	45789041	1123	AKR1A1	10327	protein-coding
chr1	45924567	45925147	0#	0#	1#[TGGTCA:470:0.8180826906887997]	582	380	50	142.94	12.6	0.04	-	NM_021639	PP	Proximal Promoter	45924889	58	GPBP1L1	60313	protein-coding
chr1	45961162	45961344	0#	0#	0#	184	84	24	245.77	44.57	0.03	-	NM_005897	Body	Gene Body	45989072	-27826	IPP	3652	protein-coding
chr1	45988640	45989184	0#	5#[AGAGGAAG:163:1.0] [CTTCCCCT:222:0.9496545689046608] [CTTCCGCT:431:0.9370344629705614] [CTTCCCCA:502:0.925367388796723] [GGAGGAAG:60:0.9250330832242935]	0#	546	183	56	218.11	16.06	0.04	-	NM_005897	PP	Proximal Promoter	45989072	-249	IPP	3652	protein-coding
chr1	45991463	45992243	1#[CAGTTCCTGTTTT:398:0.839544079222854]	4#[CTTCCTCT:636:1.0000000000000002] [CTTCCCCT:417:0.9496545689046608] [TTTCCCCT:612:0.8406605293598248] [AGAAGAAG:516:0.839218783233912]	0#	782	409	118	1119.56	100.02	0	-	NM_005897	UE	Upstream Enhancer	45989072	2800	IPP	3652	protein-coding
chr1	46281599	46282354	1#[CACTTCCTCTTTA:323:0.9526935748057964]	1#[CTTCCCCA:518:0.925367388796723]	0#	757	367	188	1581.57	61.62	0	-	NM_003629	Body	Gene Body	46370967	-89001	PIK3R3	8503	protein-coding
chr1	46295334	46295848	1#[AAATGGGGAAGTG:339:0.9009993921624174]	2#[CTTCCTCA:106:0.9757128198920624] [AGAAGAAG:400:0.839218783233912]	0#	516	369	38	255.22	22.5	0.03	-	NM_003629	Body	Gene Body	46370967	-75264	PIK3R3	8503	protein-coding
chr1	46371515	46372081	0#	2#[GTTCCTCT:446:0.9279064825938323] [GGGGGAAG:147:0.8746876521289542]	1#[TGACCC:385:0.8857896050338628]	568	393	26	135.13	13.29	0.05	-	NM_003629	PP	Proximal Promoter	46370967	941	PIK3R3	8503	protein-coding
chr1	46414575	46415124	0#	1#[CTTCCTCA:399:0.9757128198920624]	1#[GGGTCA:287:0.8857896050338628]	551	418	34	170.8	20.72	0.03	+	NM_005727	Body	Gene Body	46413335	1658	TSPAN1	10103	protein-coding
chr1	46612024	46612332	1#[AAAAGTGGAAGTG:99:0.9052793240489478]	1#[AGAGGAAT:87:0.840598909800833]	1#[TGGTCA:193:0.8180826906887997]	310	117	30	238.41	30.52	0.03	+	NM_001441	UE	Upstream Enhancer	46632525	-20384	FAAH	2166	protein-coding
chr1	46675635	46676267	1#[CACTTCCCCTTTG:497:0.9177873454902454]	1#[CTTCCTCC:335:0.9250330832242935]	0#	634	482	33	178.28	21.01	0.04	+	NR_045483	Body	Gene Body	46672085	4032	LOC729041	729041	pseudo
chr1	46759682	46759977	1#[CACTTCCTCTTCC:125:0.8333154263803636]	0#	0#	297	139	53	481.41	44.9	0	+	NR_038403	UE	Upstream Enhancer	46776954	-17133	MKNK1-AS1	100507423	miscRNA
chr1	46784116	46784455	0#	3#[AGAGGAAG:142:1.0] [GGAGGAAG:17:0.9250330832242935] [TGTGGAAG:199:0.8565942509560106]	0#	341	142	27	140.61	19.38	0.04	+	NR_038403	Body	Gene Body	46776954	7304	MKNK1-AS1	100507423	miscRNA
chr1	46784510	46784985	0#	3#[AGAGGAAG:183:1.0] [GGAGGAAC:327:0.8529395658181258] [AGGGGAAA:93:0.8406605293598248]	1#[AGGTCA:289:1.0]	477	220	34	229.64	22.95	0.03	+	NR_038403	Body	Gene Body	46776954	7776	MKNK1-AS1	100507423	miscRNA
chr1	46795700	46795973	0#	0#	0#	275	150	24	184.99	31.98	0.04	+	NR_038403	Body	Gene Body	46776954	18896	MKNK1-AS1	100507423	miscRNA
chr1	46818763	46819348	0#	3#[GTTCCTCA:329:0.9036193024858946] [CTTCCTGA:380:0.8653647538446115] [AGAGGAAT:142:0.840598909800833]	1#[AGGTCA:106:1.0]	587	316	96	912.93	85.46	0	-	NM_001135553	Body	Gene Body	46842553	-23474	MKNK1	8569	protein-coding
chr1	46833347	46833907	1#[CATTTCCCCTTTT:173:0.8370086106136765]	1#[CTTCCTCT:339:1.0000000000000002]	1#[TGACCT:282:1.0]	562	344	44	211.11	21.47	0.04	-	NM_001135553	Body	Gene Body	46842553	-8862	MKNK1	8569	protein-coding
chr1	46852137	46852391	0#	3#[CTTCCTCT:144:1.0000000000000002] [CTTCCCCT:169:0.9496545689046608] [AGAGGAAA:49:0.8910059604551641]	0#	256	122	23	110.05	11.16	0.1	-	NM_145279	Body	Gene Body	46853392	-1133	MOB3C	148932	protein-coding
chr1	46878924	46879324	2#[TACTTCCTCTTTT:130:0.8613376114672322] [CACTTCCCGCTTT:349:0.80375745361611]	0#	0#	402	127	27	229.27	43.52	0.03	-	NM_001243728	Body	Gene Body	46904137	-25086	ATPAF1	64756	protein-coding
chr1	46937954	46938321	1#[TAAAGTGGAAGTG:130:0.8579728988547443]	5#[CTTCCCCT:74:0.9496545689046608] [TGGGGAAG:218:0.925367388796723] [TGAGGAAC:318:0.9036193024858946] [GGAGGAAC:282:0.8529395658181258] [CTTCTTCT:186:0.8392187832339122]	1#[AGGTCA:165:1.0]	369	134	22	126.84	12.87	0.06	-	NM_014774	Body	Gene Body	46957323	-19235	KIAA0494	9813	protein-coding
chr1	46956899	46957606	1#[CACTTCCCCTTTG:469:0.9177873454902454]	1#[CGAGGAAG:133:0.8840323149896212]	0#	709	473	80	377.12	27.9	0.03	-	NM_014774	PP	Proximal Promoter	46957323	49	KIAA0494	9813	protein-coding
chr1	46973913	46974458	1#[AAAAAAGGAACTG:222:0.8413650334309318]	1#[TTTCCCCT:124:0.8406605293598248]	2#[AGGTCA:442:1.0] [TGACCT:516:1.0]	547	243	117	904.53	56.54	0	-	NM_014774	UE	Upstream Enhancer	46957323	16833	KIAA0494	9813	protein-coding
chr1	47010920	47011317	1#[CACTTCCTCCTTT:187:0.919110366169785]	0#	3#[AGGTCA:55:1.0] [TGACCT:372:1.0] [TGGTCA:26:0.8180826906887997]	399	161	23	110.05	19.72	0.1	+	NM_000779	UE	Upstream Enhancer	47037256	-26175	CYP4B1	1580	protein-coding
chr1	47058865	47059174	0#	2#[GGAGGAAG:111:0.9250330832242935] [CTTCCTGA:211:0.8653647538446115]	1#[TGGTCA:261:0.8180826906887997]	311	115	26	112.52	13.74	0.1	+	NM_000779	DE	DownStream Enhancer	47037256	21724	CYP4B1	1580	protein-coding
chr1	47065244	47065494	1#[GACTTCCTCTTTT:115:0.891331783801081]	0#	1#[TGGTCA:171:0.8180826906887997]	252	126	28	297.25	64	0.04	+	NM_000779	DE	DownStream Enhancer	47037256	28114	CYP4B1	1580	protein-coding
chr1	47431154	47431654	0#	4#[CTTCCCCT:248:0.9496545689046608] [CTTCCTCC:132:0.9250330832242935] [CTTCCTGT:4:0.8896519339525494] [AGAGGAAT:469:0.840598909800833]	0#	502	247	38	151.69	15.32	0.04	-	NM_005764	UE	Upstream Enhancer	47428358	3043	PDZK1IP1	10158	protein-coding
chr1	47450104	47450605	1#[CACTTCCTCTCTT:215:0.832192940694005]	2#[AGGGGAAG:127:0.9496545689046608] [AGAGGAAC:338:0.9279064825938323]	0#	503	209	70	565.9	60.47	0	-	NM_003189	DE	DownStream Enhancer	47468030	-17717	TAL1	6886	protein-coding
chr1	47551635	47552070	0#	1#[CTTCCTCT:197:1.0000000000000002]	0#	437	210	59	329.22	29.22	0.02	-	NM_001048166	PP	Proximal Promoter	47552406	-561	STIL	6491	protein-coding
chr1	47572880	47573172	0#	1#[CTTCCTGT:202:0.8896519339525494]	1#[CGGTCA:196:0.8490319803691448]	294	188	23	135.89	20.51	0.05	+	NM_001136140	PP	Proximal Promoter	47572055	1013	CMPK1	51727	protein-coding
chr1	47643935	47644374	0#	2#[AGAGGAAC:49:0.9279064825938323] [ACAGGAAG:175:0.8896519339525494]	1#[TGACCA:42:0.8180826906887997]	441	199	26	124.78	15.12	0.07	+	NM_012186	UE	Upstream Enhancer	47654330	-10196	FOXE3	2301	protein-coding
chr1	47670417	47671067	0#	5#[AGGGGAAG:158:0.9496545689046608] [ACAGGAAG:150:0.8896519339525494] [GTTCCCCT:466:0.8775610514984932] [TGAGGAAA:333:0.8667187803472263] [GTTCCCCA:413:0.8532738713905553]	0#	652	170	72	314.13	19.25	0.02	-	NR_026878	Body	Gene Body	47672900	-2313	FOXD2-AS1	84793	miscRNA
chr1	47674674	47675064	0#	1#[CGGGGAAG:123:0.8336868838942818]	1#[GGGTCA:142:0.8857896050338628]	392	250	31	137.82	16.71	0.04	+	NM_004474	PP	Proximal Promoter	47674275	649	FOXD2	2306	protein-coding
chr1	48052988	48053372	0#	0#	2#[AGGTCA:300:1.0] [CGGTCA:208:0.8490319803691448]	386	121	39	307.56	37.79	0.02	-	NM_001194986	Body	Gene Body	48235149	-182040	TRABD2B	388630	protein-coding
chr1	48480361	48480866	1#[GAAAGAGGAAGTC:188:0.8751137954250415]	0#	1#[TGACCT:16:1.0]	507	205	71	730.69	94.96	0	+	NM_001011547	Body	Gene Body	48460943	19623	SLC5A9	200010	protein-coding
chr1	48483356	48483699	0#	2#[AGAGGAAG:166:1.0] [GGAGGAAG:118:0.9250330832242935]	0#	345	147	31	119.91	9.74	0.08	+	NM_001011547	Body	Gene Body	48460943	22560	SLC5A9	200010	protein-coding
chr1	49006271	49006517	0#	1#[CTTCCTCA:137:0.9757128198920624]	0#	248	150	18	121.89	18.74	0.07	-	NM_024603	Body	Gene Body	49015134	-8713	BEND5	79656	protein-coding
chr1	48786795	48787143	0#	0#	0#	350	240	21	172.8	38.4	0.03	-	NM_032785	Body	Gene Body	50262213	-1475178	AGBL4	84871	protein-coding
chr1	48840811	48841091	0#	2#[CTTCCTCT:230:1.0000000000000002] [ACAGGAAG:177:0.8896519339525494]	0#	282	206	18	131.95	28.13	0.05	-	NM_032785	Body	Gene Body	50262213	-1421196	AGBL4	84871	protein-coding
chr1	48850089	48850442	0#	1#[GGAGGAAG:190:0.9250330832242935]	0#	355	202	107	1048.12	64.4	0	-	NM_032785	Body	Gene Body	50262213	-1411922	AGBL4	84871	protein-coding
chr1	48924246	48924713	1#[GAAAGGGGAAGTC:130:0.8348851426326365]	1#[CTTCCTCT:295:1.0000000000000002]	1#[TGGTCA:28:0.8180826906887997]	469	161	33	185	20.93	0.04	-	NM_032785	Body	Gene Body	50262213	-1337806	AGBL4	84871	protein-coding
chr1	49032057	49032612	0#	2#[AGAGGAAG:229:1.0] [AGAGGAAG:327:1.0]	1#[TGGTCA:106:0.8180826906887997]	557	240	37	169.57	13.57	0.03	-	NM_032785	Body	Gene Body	50262213	-1229916	AGBL4	84871	protein-coding
chr1	49041198	49041826	0#	1#[CTTCCTCT:460:1.0000000000000002]	1#[AGGTCA:168:1.0]	630	164	30	220.12	20.48	0.04	-	NM_032785	Body	Gene Body	50262213	-1220851	AGBL4	84871	protein-coding
chr1	49041836	49042240	1#[AAAAGAGGAAGTG:87:0.9999999999999994]	1#[TGGGGAAG:28:0.925367388796723]	0#	406	99	84	1069.93	134.55	0	-	NM_032785	Body	Gene Body	50262213	-1220278	AGBL4	84871	protein-coding
chr1	49282681	49282936	0#	0#	0#	257	105	22	163.2	25.4	0.03	-	NM_032785	Body	Gene Body	50262213	-979427	AGBL4	84871	protein-coding
chr1	49712960	49713317	1#[GACTTCCTCTTTT:194:0.891331783801081]	1#[CTTCCTCT:229:1.0000000000000002]	0#	359	194	20	159.23	35.84	0.03	-	NM_032785	Body	Gene Body	50262213	-549059	AGBL4	84871	protein-coding
chr1	50421673	50421948	0#	2#[AGGGGAAG:48:0.9496545689046608] [CTTCCTGT:132:0.8896519339525494]	0#	277	126	16	133.7	33.28	0.05	+	NM_001144777	Body	Gene Body	50286272	135527	ELAVL4	1996	protein-coding
chr1	51018205	51018488	1#[AAAAGAGGAAGTG:86:0.9999999999999994]	1#[AGAGGAAG:77:1.0]	0#	285	84	21	184.39	42.71	0.04	-	NM_007051	Body	Gene Body	51198524	-180235	FAF1	11124	protein-coding
chr1	51169685	51169883	0#	2#[TGAGGAAG:80:0.9757128198920622] [TGGGGAAG:13:0.925367388796723]	0#	200	97	13	118.91	28.16	0.08	-	NM_007051	Body	Gene Body	51198524	-28742	FAF1	11124	protein-coding
chr1	51198278	51198788	0#	3#[CTTCCTCC:217:0.9250330832242935] [TGCGGAAG:402:0.9127472828626235] [ACAGGAAG:46:0.8896519339525494]	1#[TGACCA:320:0.8180826906887997]	512	230	55	238.69	17.86	0.03	-	NM_007051	PP	Proximal Promoter	51198524	-16	FAF1	11124	protein-coding
chr1	51400872	51401234	1#[AAAAGAGGAAGTC:143:0.8913317838010807]	0#	1#[AGGTCA:271:1.0]	364	159	28	253.07	61.44	0.03	+	NM_001136508	DE	DownStream Enhancer	51340493	60538	C1orf185	284546	protein-coding
chr1	51503883	51504145	0#	2#[AGAGGAAG:95:1.0] [AGAGGAAT:105:0.840598909800833]	0#	264	99	17	138.93	31.31	0.04	+	NM_014372	Body	Gene Body	51474532	29450	RNF11	26994	protein-coding
chr1	51542040	51542651	0#	1#[AGAGGAAG:350:1.0]	1#[TGACCC:97:0.8857896050338628]	613	372	51	285.72	33.83	0.04	-	NM_001080494	Body	Gene Body	51560526	-18114	TTC39A	22996	protein-coding
chr1	51580144	51580532	0#	0#	0#	390	158	24	130.2	15.5	0.06	-	NM_001144832	Body	Gene Body	51583373	-3071	TTC39A	22996	protein-coding
chr1	51580835	51581174	0#	1#[CTTCCTCA:202:0.9757128198920624]	3#[CGGTCA:45:0.8490319803691448] [TGGTCA:110:0.8180826906887997] [TGACCA:244:0.8180826906887997]	341	205	24	161.93	31.43	0.03	-	NM_001144832	Body	Gene Body	51583373	-2333	TTC39A	22996	protein-coding
chr1	51756186	51756909	0#	4#[AGGGGAAG:533:0.9496545689046608] [GGAGGAAG:630:0.9250330832242935] [ACAGGAAG:370:0.8896519339525494] [AGTGGAAG:545:0.8808814310639483]	2#[GGGTCA:210:0.8857896050338628] [TGACCC:587:0.8857896050338628]	725	253	38	135.44	14.99	0.05	-	NM_001981	Body	Gene Body	51757583	-1144	EPS15	2060	protein-coding
chr1	51789251	51789759	1#[GACTTCCTCATTT:259:0.8325598287559037]	0#	2#[AGGTCA:96:1.0] [TGGTCA:248:0.8180826906887997]	510	266	108	1061.63	93.7	0	-	NM_001981	UE	Upstream Enhancer	51757583	31934	EPS15	2060	protein-coding
chr1	51816662	51817040	0#	1#[CTTCCTCA:133:0.9757128198920624]	2#[TGACCC:106:0.8857896050338628] [TGGTCA:117:0.8180826906887997]	380	167	75	385.38	20.49	0.03	+	NM_148909	UE	Upstream Enhancer	51855133	-38304	OSBPL9	114883	protein-coding
chr1	51844693	51844934	0#	1#[TGAGGAAG:60:0.9757128198920622]	0#	243	117	29	180.33	18.6	0.04	+	NM_148909	UE	Upstream Enhancer	51855133	-10323	OSBPL9	114883	protein-coding
chr1	51860685	51861147	0#	1#[AGAGGAAG:319:1.0]	2#[TGACCT:342:1.0] [GGGTCA:61:0.8857896050338628]	464	306	49	290.58	20.68	0.04	+	NM_148909	Body	Gene Body	51855133	5858	OSBPL9	114883	protein-coding
chr1	52014773	52015029	0#	2#[AGAGGAAG:76:1.0] [ATTCCTCT:6:0.840598909800833]	1#[TGGTCA:139:0.8180826906887997]	258	81	18	162.59	33.28	0.03	+	NM_148909	Body	Gene Body	51855133	159721	OSBPL9	114883	protein-coding
chr1	52116637	52117350	0#	2#[CTTCCTCC:191:0.9250330832242935] [AGAAGAAG:575:0.839218783233912]	2#[AGGTCA:45:1.0] [TGACCC:510:0.8857896050338628]	715	401	46	131.38	11.51	0.06	-	NM_001242361	PP	Proximal Promoter	52116300	738	NRD1	4898	protein-coding
chr1	52201867	52202462	1#[CACTTCCCCATTC:417:0.8847814037863787]	1#[CTTCCTCC:53:0.9250330832242935]	1#[TGACCT:82:1.0]	597	409	29	120.21	12.68	0.07	-	NM_002867	Body	Gene Body	52229024	-26748	RAB3B	5865	protein-coding
chr1	52247884	52248291	0#	2#[TGAGGAAG:123:0.9757128198920622] [GTTCCCCT:338:0.8775610514984932]	1#[TGACCT:23:1.0]	409	142	67	596.46	65.39	0	-	NM_002867	UE	Upstream Enhancer	52229024	19002	RAB3B	5865	protein-coding
chr1	52294975	52295390	0#	0#	1#[TGACCG:189:0.8490319803691448]	417	247	43	303.01	21.36	0.02	+	NM_001136497	PP	Proximal Promoter	52294444	778	BTF3L4	91408	protein-coding
chr1	52349827	52350084	0#	2#[CTTCCTCT:174:1.0000000000000002] [TTTCCTCT:154:0.8910059604551641]	1#[TGACCA:96:0.8180826906887997]	259	175	65	920.98	130.55	0	+	NM_007324	UE	Upstream Enhancer	52380633	-30631	ZFYVE9	9372	protein-coding
chr1	52442299	52442628	0#	2#[AGAGGAAC:110:0.9279064825938323] [GGGGGAAG:155:0.8746876521289542]	1#[AGGTCA:315:1.0]	331	132	22	180.68	32.56	0.04	+	NM_007324	Body	Gene Body	52380633	61798	ZFYVE9	9372	protein-coding
chr1	52506667	52506984	0#	1#[CTTCCTCT:152:1.0000000000000002]	0#	319	154	16	124.06	25.6	0.07	+	NM_007324	Body	Gene Body	52380633	126188	ZFYVE9	9372	protein-coding
chr1	52604249	52604858	0#	1#[ACAGGAAG:166:0.8896519339525494]	1#[TGACCC:207:0.8857896050338628]	611	356	45	114.76	8.63	0.1	-	NM_032449	PP	Proximal Promoter	52604465	140	CC2D1B	200014	protein-coding
chr1	52662418	52662900	1#[CACTTCCCCTTTA:279:0.9124649220133914]	0#	1#[TGACCC:370:0.8857896050338628]	484	281	53	251.08	23.26	0.03	-	NM_001009881	Body	Gene Body	52791350	-128651	ZCCHC11	23318	protein-coding
chr1	52664109	52664396	0#	2#[GGAGGAAG:133:0.9250330832242935] [TGGGGAAC:90:0.8532738713905553]	0#	289	135	32	289.19	39.87	0.04	-	NM_001009881	Body	Gene Body	52791350	-127106	ZCCHC11	23318	protein-coding
chr1	52771070	52771425	0#	1#[CTTCCTCA:97:0.9757128198920624]	1#[AGGTCA:286:1.0]	357	105	30	214.14	29.06	0.04	-	NM_001009881	Body	Gene Body	52791350	-20175	ZCCHC11	23318	protein-coding
chr1	52826780	52827235	0#	3#[CTTCCCCT:196:0.9496545689046608] [GTTCCTCT:171:0.9279064825938323] [CTTCCTCC:255:0.9250330832242935]	1#[TGACCT:208:1.0]	457	192	80	860.95	88.09	0	+	NM_015696	UE	Upstream Enhancer	52840630	-13658	GPX7	2882	protein-coding
chr1	52830931	52831309	0#	2#[CTTCCCCT:167:0.9496545689046608] [CTTCCCCA:188:0.925367388796723]	1#[AGGTCA:297:1.0]	380	81	18	109.83	15	0.1	+	NM_015696	UE	Upstream Enhancer	52840630	-9618	GPX7	2882	protein-coding
chr1	52869987	52870572	0#	3#[CTTCCTCA:280:0.9757128198920624] [CTTCCTCC:32:0.9250330832242935] [GTTCCCCA:570:0.8532738713905553]	2#[TGACCT:229:1.0] [AGGTCA:437:1.0]	587	314	71	433.46	35.71	0.03	+	NM_001042693	PP	Proximal Promoter	52871653	-1352	FAM159A	348378	protein-coding
chr1	52874765	52876065	0#	4#[AGAGGAAC:746:0.9279064825938323] [CTTCCACT:489:0.8808814310639483] [TCAGGAAG:986:0.8653647538446115] [TGTGGAAG:92:0.8565942509560106]	5#[AGGTCA:1215:1.0] [TGACCC:399:0.8857896050338628] [TGACCC:653:0.8857896050338628] [TGACCA:16:0.8180826906887997] [TGGTCA:1133:0.8180826906887997]	1302	760	123	503.32	25.19	0	+	NM_001042693	Body	Gene Body	52871653	3872	FAM159A	348378	protein-coding
chr1	52941362	52941929	0#	2#[CTTCCTCA:207:0.9757128198920624] [AGAGGAAA:466:0.8910059604551641]	1#[TGACCT:322:1.0]	569	364	40	148.77	11.03	0.03	-	NM_023077	UE	Upstream Enhancer	52936626	5100	SELRC1	65260	protein-coding
chr1	53253074	53253301	0#	1#[AGGGGAAG:113:0.9496545689046608]	0#	229	141	25	126.2	12.65	0.07	+	NM_001007099	PP	Proximal Promoter	53253197	18	SCP2	6342	protein-coding
chr1	53434721	53435284	0#	2#[AGGGGAAG:166:0.9496545689046608] [TGAGGAAA:26:0.8667187803472263]	0#	565	219	28	115.01	12.79	0.09	+	NM_000098	PP	Proximal Promoter	53434688	252	CPT2	1376	protein-coding
chr1	53436090	53436324	0#	2#[CTTCCCCT:134:0.9496545689046608] [CTTCCCCT:166:0.9496545689046608]	0#	236	142	21	147.34	23.26	0.04	+	NM_000098	Body	Gene Body	53434688	1544	CPT2	1376	protein-coding
chr1	53606187	53606925	0#	3#[CTTCCTCT:325:1.0000000000000002] [CTTCCCCC:235:0.874687652128954] [TTTCCCCT:63:0.8406605293598248]	0#	740	327	81	317.2	22.73	0.02	-	NM_001018054	UE	Upstream Enhancer	53566409	40105	LRP8	7804	protein-coding
chr1	53655250	53655714	0#	2#[AGAGGAAG:212:1.0] [GGAGGAAG:194:0.9250330832242935]	2#[TGACCG:79:0.8490319803691448] [TGACCA:253:0.8180826906887997]	466	229	34	140.97	17.8	0.04	-	NR_002314	DE	DownStream Enhancer	53678281	-22802	SLC25A3P1	163742	pseudo
chr1	53680757	53680958	0#	2#[CTTCCCCA:77:0.925367388796723] [CTTCCTCC:94:0.9250330832242935]	0#	203	80	28	323.55	66.56	0.02	-	NR_002314	UE	Upstream Enhancer	53678281	2556	SLC25A3P1	163742	pseudo
chr1	53692223	53692632	0#	2#[TTTCCTCT:120:0.8910059604551641] [CTTCCACA:157:0.8565942509560106]	1#[TGGTCA:134:0.8180826906887997]	411	264	76	638.76	55.44	0	+	NM_033067	UE	Upstream Enhancer	53697659	-5172	DMRTB1	63948	protein-coding
chr1	53693944	53694309	1#[GACTTCCTGTTTT:188:0.8162075240398107]	1#[TGGGGAAG:140:0.925367388796723]	1#[TGACCA:36:0.8180826906887997]	367	147	23	117.66	17.44	0.08	+	NM_033067	UE	Upstream Enhancer	53697659	-3568	DMRTB1	63948	protein-coding
chr1	53767098	53767476	0#	0#	0#	380	198	22	121.44	16.61	0.07	-	NM_147193	Body	Gene Body	53972465	-205169	GLIS1	148979	protein-coding
chr1	53876230	53876778	0#	1#[AGGGGAAG:227:0.9496545689046608]	2#[GGGTCA:185:0.8857896050338628] [TGACCA:522:0.8180826906887997]	550	231	30	119.65	9.69	0.08	-	NM_147193	Body	Gene Body	53972465	-96004	GLIS1	148979	protein-coding
chr1	54076174	54077085	0#	4#[AGAGGAAG:685:1.0] [CTTCCCCA:165:0.925367388796723] [CTTCCACT:79:0.8808814310639483] [CTTCCACT:115:0.8808814310639483]	1#[TGACCA:68:0.8180826906887997]	913	690	114	464.65	28.95	0	-	NM_001168551	PP	Proximal Promoter	54076813	51	TMEM48	55706	protein-coding
chr1	54220361	54220626	0#	2#[AGAGGAAG:60:1.0] [CTTCCCCC:118:0.874687652128954]	1#[TGACCA:209:0.8180826906887997]	267	84	50	336.89	27.32	0.02	+	NM_052940	DE	DownStream Enhancer	54184586	35859	LRRC42	115353	protein-coding
chr1	54291459	54292160	0#	5#[AGAGGAAC:439:0.9279064825938323] [GGAGGAAG:457:0.9250330832242935] [CTTCCGCC:93:0.8620675461948546] [CTTCCGCC:355:0.8620675461948546] [CTTCTTCT:173:0.8392187832339122]	1#[TGACCA:683:0.8180826906887997]	703	227	66	305.18	14.53	0.02	+	NM_153035	PP	Proximal Promoter	54291861	-175	TCEANC2	127428	protein-coding
chr1	54335095	54335472	1#[TAATGAGGAACTG:241:0.8085899587447435]	0#	0#	379	245	63	471.7	37.38	0	+	NM_153035	Body	Gene Body	54291861	43479	TCEANC2	127428	protein-coding
chr1	54394425	54394839	0#	1#[TTTCCCCT:193:0.8406605293598248]	1#[TGGTCA:216:0.8180826906887997]	416	211	32	168.1	16.45	0.03	-	NM_201546	UE	Upstream Enhancer	54392031	2605	CDCP2	200008	protein-coding
chr1	54457949	54459754	1#[CACTTCCTTTTTC:141:0.9104787060707685]	7#[AGAGGAAG:991:1.0] [AGAGGAAC:1135:0.9279064825938323] [GTTCCTCT:1636:0.9279064825938323] [CTTCCTCG:1352:0.8840323149896212] [TGAGGAAA:841:0.8667187803472263] [AGCGGAAC:1005:0.8649409455643936] [TTTCCCCT:1312:0.8406605293598248]	4#[TGACCT:609:1.0] [GGGTCA:1107:0.8857896050338628] [TGACCC:1679:0.8857896050338628] [TGACCC:1728:0.8857896050338628]	1807	1001	230	1418.3	49	0	+	NM_016491	DE	DownStream Enhancer	54438427	20523	MRPL37	51253	protein-coding
chr1	54476450	54477319	0#	5#[CTTCCTCT:743:1.0000000000000002] [AGGGGAAG:269:0.9496545689046608] [GGAGGAAG:229:0.9250330832242935] [GGAGGAAG:371:0.9250330832242935] [CTTCCCCC:654:0.874687652128954]	0#	871	397	217	2082.99	92.05	0	-	NM_145716	Body	Gene Body	54644567	-167720	SSBP3	23648	protein-coding
chr1	54655413	54655788	0#	1#[CTTCCCCA:282:0.925367388796723]	0#	377	275	74	741.19	67.94	0	-	NM_145716	UE	Upstream Enhancer	54644567	11121	SSBP3	23648	protein-coding
chr1	54662622	54662915	0#	1#[CTTCCCCA:210:0.925367388796723]	0#	295	206	23	135.89	18.29	0.05	-	NM_145716	UE	Upstream Enhancer	54644567	18261	SSBP3	23648	protein-coding
chr1	54646372	54646958	0#	2#[AGGGGAAA:38:0.8406605293598248] [TTTCCCCT:195:0.8406605293598248]	1#[TGACCC:451:0.8857896050338628]	588	437	44	273.03	28.07	0.04	-	NM_001009955	PP	Proximal Promoter	54644680	2129	SSBP3	23648	protein-coding
chr1	54780851	54781634	0#	3#[CTTCCTCT:546:1.0000000000000002] [CTTCCTCT:574:1.0000000000000002] [TTTCCTCT:428:0.8910059604551641]	3#[AGGTCA:534:1.0] [GGGTCA:668:0.8857896050338628] [TGGTCA:63:0.8180826906887997]	785	578	78	436.62	34.25	0.03	+	NM_147161	UE	Upstream Enhancer	54786394	-4965	ACOT11	26027	protein-coding
chr1	54781762	54782612	1#[CATTTCCTCTTTT:652:0.8772372634060817]	2#[CTTCCTCT:712:1.0000000000000002] [AGCGGAAG:528:0.9370344629705611]	2#[AGGTCA:27:1.0] [CGGTCA:437:0.8490319803691448]	852	520	80	214.23	15.94	0.04	+	NM_147161	UE	Upstream Enhancer	54786394	-4112	ACOT11	26027	protein-coding
chr1	54784478	54785574	0#	3#[CTTCCTCA:83:0.9757128198920624] [GGAGGAAG:1070:0.9250330832242935] [TTTCCTCA:391:0.8667187803472263]	2#[AGGTCA:58:1.0] [TGACCA:730:0.8180826906887997]	1098	886	79	208.64	13.88	0.04	+	NM_147161	PP	Proximal Promoter	54786394	-1030	ACOT11	26027	protein-coding
chr1	54810063	54810575	0#	2#[GGAGGAAG:98:0.9250330832242935] [GGAGGAAG:249:0.9250330832242935]	1#[TGACCT:353:1.0]	514	269	38	124.47	14.08	0.07	+	NM_147161	Body	Gene Body	54786394	23938	ACOT11	26027	protein-coding
chr1	54842773	54843340	0#	4#[CTTCCTCC:176:0.9250330832242935] [CTTCCTGT:131:0.8896519339525494] [CTTCCTGT:378:0.8896519339525494] [GTTCCCCT:272:0.8775610514984932]	1#[TGACCA:166:0.8180826906887997]	569	178	70	321.18	22.15	0.02	+	NM_147161	Body	Gene Body	54786394	56557	ACOT11	26027	protein-coding
chr1	55097914	55098426	0#	1#[GTTCCTCT:216:0.9279064825938323]	2#[TGACCA:16:0.8180826906887997] [TGACCA:485:0.8180826906887997]	514	268	37	144.67	13.45	0.04	-	NM_014762	Body	Gene Body	55125509	-27327	DHCR24	1718	protein-coding
chr1	55125921	55126330	0#	1#[CTTCCTCT:185:1.0000000000000002]	0#	411	179	41	194.36	21.2	0.04	-	NM_014762	PP	Proximal Promoter	55125509	591	DHCR24	1718	protein-coding
chr1	55203855	55204704	0#	3#[CTTCCTCT:524:1.0000000000000002] [CTTCCCCT:668:0.9496545689046608] [CGAGGAAG:190:0.8840323149896212]	2#[TGGTCA:504:0.8180826906887997] [TGACCA:563:0.8180826906887997]	851	530	56	226.58	13.49	0.03	+	NM_182532	UE	Upstream Enhancer	55219052	-14667	TMEM61	199964	protein-coding
chr1	55209394	55209889	0#	1#[CTTCCTCA:126:0.9757128198920624]	1#[TGACCA:387:0.8180826906887997]	497	264	74	404.45	28.9	0.03	+	NM_182532	UE	Upstream Enhancer	55219052	-9394	TMEM61	199964	protein-coding
chr1	55291428	55291808	0#	2#[TGGGGAAC:347:0.8532738713905553] [GGAGGAAC:76:0.8529395658181258]	1#[AGGTCA:49:1.0]	382	217	26	129.58	20.08	0.07	+	NM_174936	Body	Gene Body	55277736	13909	PCSK9	255738	protein-coding
chr1	55377094	55377411	1#[AAAAAAGGAAGTG:92:0.9266966944468076]	0#	1#[TGGTCA:281:0.8180826906887997]	319	92	20	133.05	24.92	0.05	-	NM_015306	Body	Gene Body	55453627	-76441	USP24	23358	protein-coding
chr1	55417384	55417729	0#	1#[GTTCCTCA:205:0.9036193024858946]	1#[TGACCA:264:0.8180826906887997]	347	191	26	112.52	11.3	0.1	-	NM_015306	Body	Gene Body	55453627	-36052	USP24	23358	protein-coding
chr1	55433101	55433525	0#	1#[CTTCCTCA:250:0.9757128198920624]	0#	426	243	28	201.99	36.82	0.03	-	NM_015306	Body	Gene Body	55453627	-20283	USP24	23358	protein-coding
chr1	55450250	55450620	1#[CACTTCCCCTTTG:125:0.9177873454902454]	0#	0#	372	123	61	541.79	59.3	0	-	NM_015306	Body	Gene Body	55453627	-3254	USP24	23358	protein-coding
chr1	55455774	55456192	0#	3#[AGAGGAAG:76:1.0] [AGAGGAAG:212:1.0] [AGAGGAAG:236:1.0]	1#[AGGTCA:136:1.0]	420	235	37	309.48	29.53	0.02	+	NR_038320	DE	DownStream Enhancer	55453668	2341	LOC100507634	100507634	miscRNA
chr1	56711054	56711854	1#[GAAAGGGGAAGTG:239:0.9435533588315553]	3#[AGAGGAAG:218:1.0] [GTTCCCCA:287:0.8532738713905553] [AGAAGAAG:77:0.839218783233912]	3#[TGACCC:581:0.8857896050338628] [GGGTCA:637:0.8857896050338628] [TGGTCA:694:0.8180826906887997]	802	279	127	1155.12	102.58	0	-	NM_003713	DE	DownStream Enhancer	56817845	-106512	PPAP2B	8613	protein-coding
chr1	56754729	56754984	0#	1#[CTTCCTCA:120:0.9757128198920624]	1#[TGACCT:74:1.0]	257	122	35	396.52	67.44	0.03	-	NM_003713	Body	Gene Body	56817845	-62994	PPAP2B	8613	protein-coding
chr1	56763758	56764230	1#[CACTTCCTGCTTG:156:0.8020021046911654]	1#[CTTCCTCC:229:0.9250330832242935]	1#[TGGTCA:192:0.8180826906887997]	474	254	75	569.3	35.83	0	-	NM_003713	Body	Gene Body	56817845	-53833	PPAP2B	8613	protein-coding
chr1	56803331	56803561	0#	2#[TGGGGAAG:134:0.925367388796723] [CTTCCTGT:89:0.8896519339525494]	2#[TGACCC:21:0.8857896050338628] [GGGTCA:124:0.8857896050338628]	232	111	16	145.95	30.72	0.04	-	NM_003713	Body	Gene Body	56817845	-14403	PPAP2B	8613	protein-coding
chr1	57111562	57111889	1#[GAAAAGGGAAGTG:102:0.8702500532783634]	0#	0#	329	122	26	239.51	51.2	0.03	+	NM_000562	Body	Gene Body	57093030	18654	C8A	731	protein-coding
chr1	57148949	57149310	1#[CACTTCCCCTTTG:235:0.9177873454902454]	1#[GTTCCTCT:258:0.9279064825938323]	3#[TGACCT:23:1.0] [TGACCT:221:1.0] [TGACCA:42:0.8180826906887997]	363	225	19	147.23	35.84	0.04	+	NM_000562	Body	Gene Body	57093030	56144	C8A	731	protein-coding
chr1	57160322	57160793	1#[CACTTCCTCATTT:247:0.9412280449548228]	1#[TGAGGAAC:45:0.9036193024858946]	0#	473	244	43	316.76	42.15	0.02	+	NM_000562	DE	DownStream Enhancer	57093030	67536	C8A	731	protein-coding
chr1	57186593	57187027	1#[AAAAGAGGAAGTG:264:0.9999999999999994]	0#	1#[TGGTCA:426:0.8180826906887997]	436	287	51	347.15	37.52	0.03	-	NM_000066	Body	Gene Body	57204276	-17396	C8B	732	protein-coding
chr1	57464650	57464925	1#[CACTTCCTCTTTG:138:0.9580159982826505]	0#	0#	277	124	15	122.38	30.72	0.07	-	NM_021080	Body	Gene Body	58488799	-1024025	DAB1	1600	protein-coding
chr1	58201863	58202177	1#[CACTTCCCCTTTC:89:0.9435533588315557]	0#	0#	316	98	25	231.24	48.64	0.03	-	NM_021080	Body	Gene Body	58488799	-286838	DAB1	1600	protein-coding
chr1	58224643	58225066	0#	2#[CTTCCTCT:301:1.0000000000000002] [TCAGGAAG:264:0.8653647538446115]	1#[TGACCT:313:1.0]	425	299	50	538.74	81.92	0	-	NM_021080	Body	Gene Body	58488799	-263857	DAB1	1600	protein-coding
chr1	58502781	58503143	1#[AAATGAGGAAGTG:129:0.9412280449548224]	0#	1#[TGGTCA:340:0.8180826906887997]	364	161	20	158.06	38.4	0.03	-	NM_021080	UE	Upstream Enhancer	58488799	14143	DAB1	1600	protein-coding
chr1	58784877	58785217	0#	0#	0#	342	144	44	312.76	29.07	0.02	-	NM_145243	PP	Proximal Promoter	58785034	-13	OMA1	115209	protein-coding
chr1	58975139	58975757	0#	2#[TGGGGAAG:526:0.925367388796723] [GGAGGAAG:30:0.9250330832242935]	0#	620	175	22	111.2	16.04	0.1	-	NM_001085487	UE	Upstream Enhancer	58938335	36979	MYSM1	114803	protein-coding
chr1	59020185	59020845	0#	2#[CTTCCTCT:372:1.0000000000000002] [GTTCCTCA:360:0.9036193024858946]	0#	662	366	45	151.32	14	0.04	-	NM_002228	Body	Gene Body	59022373	-1822	JUN	3725	protein-coding
chr1	59054519	59054982	1#[CACTTCCTGCTTT:209:0.8439861064085148]	0#	0#	465	215	54	338.33	38.75	0.02	+	NR_034015	Body	Gene Body	59023410	31324	LOC100131060	100131060	miscRNA
chr1	59084164	59084502	1#[CAGTTCCTCCTTT:229:0.8337787051539093]	2#[CTTCCCCA:198:0.925367388796723] [TTTCCTCT:211:0.8910059604551641]	1#[GGGTCA:35:0.8857896050338628]	340	231	48	393.56	43.02	0.03	+	NR_034015	Body	Gene Body	59023410	60985	LOC100131060	100131060	miscRNA
chr1	59092700	59093182	1#[CACTTCCCCATTC:259:0.8847814037863787]	0#	0#	484	245	74	499.8	41.86	0	+	NR_034015	Body	Gene Body	59023410	69535	LOC100131060	100131060	miscRNA
chr1	59121644	59122142	0#	6#[CTTCCTCT:186:1.0000000000000002] [AGAGGAAA:44:0.8910059604551641] [AGGGGAAC:450:0.8775610514984932] [TGAGGAAA:470:0.8667187803472263] [GGCGGAAG:326:0.8620675461948546] [CTTCTTCT:431:0.8392187832339122]	0#	500	198	84	736.6	53.49	0	+	NR_034015	Body	Gene Body	59023410	98432	LOC100131060	100131060	miscRNA
chr1	59133728	59134233	0#	4#[CTTCCTCT:240:1.0000000000000002] [TGAGGAAG:39:0.9757128198920622] [GGAGGAAG:68:0.9250330832242935] [GGAGGAAG:228:0.9250330832242935]	0#	507	251	42	180.78	16.95	0.04	+	NR_034015	Body	Gene Body	59023410	110569	LOC100131060	100131060	miscRNA
chr1	59137099	59138021	0#	4#[AGAGGAAG:216:1.0] [AGAGGAAG:409:1.0] [TGAGGAAG:730:0.9757128198920622] [AGGGGAAA:429:0.8406605293598248]	5#[AGGTCA:144:1.0] [TGACCT:629:1.0] [GGGTCA:423:0.8857896050338628] [CGGTCA:352:0.8490319803691448] [TGACCG:786:0.8490319803691448]	924	296	76	437.28	25.97	0.03	+	NR_034015	Body	Gene Body	59023410	113985	LOC100131060	100131060	miscRNA
chr1	59145623	59146016	0#	2#[CTTCCTCT:230:1.0000000000000002] [GTTCCCCT:73:0.8775610514984932]	0#	395	255	46	296.68	30.31	0.04	+	NR_034015	DE	DownStream Enhancer	59023410	122468	LOC100131060	100131060	miscRNA
chr1	59348545	59348917	1#[GAAGGAGGAAGTG:214:0.9028923777937458]	0#	1#[TGGTCA:60:0.8180826906887997]	374	234	46	395.2	47.97	0.03	-	NR_027120	DE	DownStream Enhancer	59385067	-36288	HSD52	729467	miscRNA
chr1	59504570	59505119	0#	1#[CTTCCCCA:302:0.925367388796723]	2#[TGGTCA:146:0.8180826906887997] [TGACCA:214:0.8180826906887997]	551	328	34	172.12	16.28	0.03	+	NM_018291	UE	Upstream Enhancer	59535212	-30314	FGGY	55277	protein-coding
chr1	59510845	59511185	0#	1#[TGGGGAAG:160:0.925367388796723]	1#[GGGTCA:190:0.8857896050338628]	342	240	21	174.86	35.84	0.04	+	NM_018291	UE	Upstream Enhancer	59535212	-24127	FGGY	55277	protein-coding
chr1	59535158	59535650	0#	3#[CTTCCTCT:346:1.0000000000000002] [CTTCCCCT:120:0.9496545689046608] [CTTCCTCC:170:0.9250330832242935]	1#[TGACCC:15:0.8857896050338628]	494	161	44	176.62	12.76	0.04	+	NM_018291	PP	Proximal Promoter	59535212	107	FGGY	55277	protein-coding
chr1	59629524	59629889	0#	2#[TGAGGAAG:236:0.9757128198920622] [GGAGGAAG:106:0.9250330832242935]	2#[TGACCT:344:1.0] [GGGTCA:64:0.8857896050338628]	367	116	29	123.09	10.67	0.07	+	NM_018291	Body	Gene Body	59535212	94428	FGGY	55277	protein-coding
chr1	59634677	59635039	1#[GAAAGGGGAAGTA:116:0.8048909702987879]	0#	0#	364	136	41	406.85	61.37	0.03	+	NM_018291	Body	Gene Body	59535212	99601	FGGY	55277	protein-coding
chr1	59648761	59649025	1#[GAAAGAGGAAGTC:145:0.8751137954250415]	0#	0#	266	161	18	121.89	23.2	0.07	+	NM_018291	Body	Gene Body	59535212	113710	FGGY	55277	protein-coding
chr1	59651000	59651627	1#[GAAAGAGGAAGTG:207:0.9837820116239603]	1#[TGAGGAAA:133:0.8667187803472263]	2#[TGACCT:324:1.0] [GGGTCA:160:0.8857896050338628]	629	225	150	1470.58	87.77	0	+	NM_018291	Body	Gene Body	59535212	116013	FGGY	55277	protein-coding
chr1	59745172	59745575	1#[AAAAAGGGAAGTG:213:0.8864680416544026]	1#[TTTCCCCT:8:0.8406605293598248]	0#	405	227	74	891.58	114.04	0	+	NM_018291	Body	Gene Body	59535212	210187	FGGY	55277	protein-coding
chr1	59808837	59809224	0#	0#	0#	389	144	36	155.59	14.86	0.03	+	NM_018291	Body	Gene Body	59535212	273769	FGGY	55277	protein-coding
chr1	59894369	59894732	1#[CACTTCCTCTTGT:155:0.8321738191472476]	1#[CTTCCTCT:146:1.0000000000000002]	0#	365	160	19	146.79	33.28	0.04	+	NM_018291	Body	Gene Body	59535212	359317	FGGY	55277	protein-coding
chr1	59904338	59904742	0#	2#[CTTCCTCT:228:1.0000000000000002] [CTTCTTCT:37:0.8392187832339122]	0#	406	238	19	129.19	25.08	0.07	+	NM_018291	Body	Gene Body	59535212	369364	FGGY	55277	protein-coding
chr1	59931668	59932112	0#	7#[AGAGGAAG:139:1.0] [AGAGGAAG:238:1.0] [GGAGGAAG:154:0.9250330832242935] [GGAGGAAG:269:0.9250330832242935] [ACAGGAAG:51:0.8896519339525494] [AGAAGAAG:130:0.839218783233912] [AGAAGAAG:247:0.839218783233912]	0#	446	266	29	143.45	16.6	0.04	+	NM_018291	Body	Gene Body	59535212	396722	FGGY	55277	protein-coding
chr1	59934844	59935457	1#[GAAACGGGAAGTG:312:0.8684290990702854]	1#[TGAGGAAG:294:0.9757128198920622]	1#[AGGTCA:506:1.0]	615	329	165	1676.04	117.48	0	+	NM_018291	Body	Gene Body	59535212	399961	FGGY	55277	protein-coding
chr1	59970508	59971184	1#[GAATGGGGAAGTG:245:0.8847814037863783]	3#[AGGGGAAG:419:0.9496545689046608] [AGAGGAAA:399:0.8910059604551641] [AGGGGAAA:47:0.8406605293598248]	1#[GGGTCA:376:0.8857896050338628]	678	276	72	347.03	30.1	0.03	-	NR_039861	PP	Proximal Promoter	59971556	-772	MIR4711	100616409	miscRNA
chr1	61691613	61692119	0#	1#[GGAGGAAG:362:0.9250330832242935]	0#	508	281	32	126.81	10.97	0.06	+	NM_001145511	Body	Gene Body	61315533	376361	NFIA	4774	protein-coding
chr1	61908348	61908694	1#[TAAAGAGGAACTG:91:0.8673619137899203]	0#	0#	348	105	45	461.14	68.79	0	-	NM_032027	DE	DownStream Enhancer	61963683	-55230	TM2D1	83941	protein-coding
chr1	61963135	61963743	0#	2#[CTTCCGCT:271:0.9370344629705614] [GGAGGAAG:503:0.9250330832242935]	0#	610	272	70	343.36	21.92	0.02	-	NM_032027	PP	Proximal Promoter	61963683	-276	TM2D1	83941	protein-coding
chr1	62019355	62019810	0#	2#[CTTCCTCA:313:0.9757128198920624] [TTTCCTCT:246:0.8910059604551641]	0#	457	236	46	448.39	79.07	0.04	+	NM_176877	Body	Gene Body	61980736	38855	INADL	10207	protein-coding
chr1	62526901	62527367	1#[AAATGAGGAAGTG:218:0.9412280449548224]	0#	0#	468	235	50	383.03	50.34	0.03	-	NM_181712	Body	Gene Body	62557671	-30535	KANK4	163782	protein-coding
chr1	62527531	62527899	0#	1#[AGAGGAAC:215:0.9279064825938323]	0#	370	216	33	288.28	42.64	0.04	-	NM_181712	Body	Gene Body	62557671	-29924	KANK4	163782	protein-coding
chr1	62573922	62574376	2#[GAAAAGGGAAGTG:243:0.8702500532783634] [CAATGTGGAAGTG:98:0.8045233672864212]	2#[TGGGGAAG:381:0.925367388796723] [AGAGGAAA:197:0.8910059604551641]	0#	456	258	32	285.91	48.64	0.04	-	NM_181712	UE	Upstream Enhancer	62557671	16509	KANK4	163782	protein-coding
chr1	62594719	62595234	0#	0#	1#[AGGTCA:296:1.0]	517	257	61	318.76	22.71	0.02	-	NM_181712	UE	Upstream Enhancer	62557671	37305	KANK4	163782	protein-coding
chr1	63761379	63762004	0#	2#[CTTCCTCT:580:1.0000000000000002] [AGAGGAAC:453:0.9279064825938323]	0#	627	465	48	156.2	13.97	0.03	+	NM_032437	PP	Proximal Promoter	63761600	244	EFCAB7	84455	protein-coding
chr1	63980795	63981134	0#	1#[AGAGGAAG:143:1.0]	2#[TGACCT:184:1.0] [AGGTCA:195:1.0]	341	158	18	121.89	25.77	0.07	+	NM_001083592	UE	Upstream Enhancer	64012277	-31324	ROR1	4919	protein-coding
chr1	63991185	63991552	0#	3#[AGAGGAAG:168:1.0] [GGAGGAAG:130:0.9250330832242935] [AGTGGAAG:249:0.8808814310639483]	0#	369	140	31	278.47	55.78	0.04	+	NM_001083592	UE	Upstream Enhancer	64012277	-20952	ROR1	4919	protein-coding
chr1	64158711	64158950	0#	1#[TGAGGAAG:160:0.9757128198920622]	1#[TGACCG:50:0.8490319803691448]	241	171	21	181.27	36.82	0.04	+	NM_001083592	Body	Gene Body	64012277	146605	ROR1	4919	protein-coding
chr1	64410082	64410383	0#	0#	0#	303	113	28	171.81	21.14	0.03	+	NM_005012	Body	Gene Body	64012277	397918	ROR1	4919	protein-coding
chr1	64505307	64505518	1#[GGAAGAGGAAGTG:106:0.8333154263803634]	0#	0#	213	127	21	208.91	46.51	0.04	+	NM_152489	DE	DownStream Enhancer	64442077	63357	UBE2U	148581	protein-coding
chr1	64750450	64751025	0#	4#[CTTCCTCT:464:1.0000000000000002] [CTTCCCCT:286:0.9496545689046608] [GTTCCTCC:310:0.8529395658181256] [AGAGGAAT:486:0.840598909800833]	2#[AGGTCA:0:1.0] [TGGTCA:71:0.8180826906887997]	577	291	73	739.48	85.13	0	+	NM_020925	Body	Gene Body	64709063	41678	CACHD1	57685	protein-coding
chr1	65089937	65090451	1#[CACTTCCTCTTTC:188:0.9837820116239607]	0#	0#	516	196	53	367.91	40.8	0.03	-	NM_002227	Body	Gene Body	65204775	-114642	JAK1	3716	protein-coding
chr1	65102250	65103189	2#[AAAAGAGGAAGTG:316:0.9999999999999994] [CACTTCCTGCTTG:275:0.8020021046911654]	3#[CTTCCTCA:93:0.9757128198920624] [CTTCCCCT:236:0.9496545689046608] [TTTCCTCT:342:0.8910059604551641]	1#[TGACCA:837:0.8180826906887997]	941	330	247	1992.92	56	0	-	NM_002227	Body	Gene Body	65204775	-102195	JAK1	3716	protein-coding
chr1	65155542	65156106	1#[CAAAGAGGAAGTG:150:0.9580159982826502]	2#[GTTCCCCT:393:0.8775610514984932] [ATTCCTCT:505:0.840598909800833]	1#[TGACCA:229:0.8180826906887997]	566	199	59	329.22	32.08	0.02	-	NM_002227	Body	Gene Body	65204775	-49034	JAK1	3716	protein-coding
chr1	65194987	65195720	0#	4#[AGAGGAAG:24:1.0] [CTTCCCCT:581:0.9496545689046608] [GGAGGAAG:423:0.9250330832242935] [AGAGGAAA:470:0.8910059604551641]	4#[AGGTCA:340:1.0] [TGACCT:350:1.0] [GGGTCA:73:0.8857896050338628] [TGACCA:635:0.8180826906887997]	735	229	42	142.35	10.8	0.04	-	NM_002227	Body	Gene Body	65204775	-9559	JAK1	3716	protein-coding
chr1	65294486	65294969	0#	2#[GTTCCTCT:158:0.9279064825938323] [CTTCCCCA:311:0.925367388796723]	3#[TGACCC:351:0.8857896050338628] [TGGTCA:86:0.8180826906887997] [TGACCA:227:0.8180826906887997]	485	229	48	271.8	24.15	0.04	-	NR_037443	DE	DownStream Enhancer	65296113	-1398	MIR3671	100500854	miscRNA
chr1	65403890	65404366	1#[AAAAGGGGAAGTG:161:0.9597713472075948]	1#[GTTCCTCA:30:0.9036193024858946]	0#	478	175	142	1210.61	52.49	0	+	NM_203464	Body	Gene Body	65385819	18246	AK4	205	protein-coding
chr1	65659946	65660238	1#[AAAAAAGGAAGTC:193:0.8180284782478886]	1#[TGAGGAAC:261:0.9036193024858946]	0#	294	201	35	267.52	27.35	0.04	+	NM_017526	Body	Gene Body	65658718	1429	LEPROT	54741	protein-coding
chr1	65697508	65698033	1#[AAATCAGGAAGTG:287:0.8661037851935524]	0#	1#[TGACCT:62:1.0]	527	311	72	546.38	54.97	0	+	NM_001003679	Body	Gene Body	65658922	38897	LEPR	3953	protein-coding
chr1	66083819	66084257	0#	1#[TGAGGAAG:244:0.9757128198920622]	0#	440	205	35	186.3	17.44	0.04	+	NM_001037341	Body	Gene Body	66030780	53244	PDE4B	5142	protein-coding
chr1	66375393	66375772	0#	0#	0#	381	230	29	260.39	48.84	0.04	+	NM_001037341	Body	Gene Body	66030780	344843	PDE4B	5142	protein-coding
chr1	66489763	66490176	0#	2#[AGAGGAAG:203:1.0] [TGAGGAAG:308:0.9757128198920622]	0#	415	211	76	805.45	75.6	0	+	NM_001037341	Body	Gene Body	66030780	459194	PDE4B	5142	protein-coding
chr1	66565921	66566326	1#[GAAAAGGGAAGTG:120:0.8702500532783634]	0#	0#	407	135	71	579.37	46.38	0	+	NM_001037341	Body	Gene Body	66030780	535276	PDE4B	5142	protein-coding
chr1	66566674	66567169	0#	3#[CTTCCTCA:210:0.9757128198920624] [ACAGGAAG:25:0.8896519339525494] [CTTCCTGT:218:0.8896519339525494]	1#[TGACCA:323:0.8180826906887997]	497	223	31	159.75	24.27	0.03	+	NM_001037341	Body	Gene Body	66030780	536117	PDE4B	5142	protein-coding
chr1	66574047	66574777	0#	5#[TGAGGAAG:503:0.9757128198920622] [AGAGGAAC:241:0.9279064825938323] [GTTCCTCA:177:0.9036193024858946] [CTTCCTGA:333:0.8653647538446115] [CTTCCTGA:454:0.8653647538446115]	4#[TGACCT:325:1.0] [TGACCT:338:1.0] [TGACCT:362:1.0] [GGGTCA:637:0.8857896050338628]	732	296	87	443.42	18.33	0.03	+	NM_001037341	Body	Gene Body	66030780	543563	PDE4B	5142	protein-coding
chr1	66588449	66588853	0#	4#[CTTCCTCT:183:1.0000000000000002] [AGAGGAAG:259:1.0] [ACAGGAAG:92:0.8896519339525494] [AGAAGAAG:373:0.839218783233912]	2#[TGACCT:234:1.0] [AGGTCA:342:1.0]	406	172	23	140.88	26.58	0.04	+	NM_001037341	Body	Gene Body	66030780	557841	PDE4B	5142	protein-coding
chr1	66631785	66632673	0#	1#[AGAGGAAG:565:1.0]	0#	890	580	120	601.16	19.55	0	+	NM_002600	DE	DownStream Enhancer	66031443	600922	PDE4B	5142	protein-coding
chr1	66633359	66634014	0#	1#[TTTCCTCT:353:0.8910059604551641]	1#[AGGTCA:633:1.0]	657	348	41	163.42	15.21	0.03	+	NM_002600	DE	DownStream Enhancer	66031443	602264	PDE4B	5142	protein-coding
chr1	66635574	66635811	0#	1#[TGAGGAAC:64:0.9036193024858946]	0#	239	83	19	124.5	18.96	0.07	+	NM_002600	DE	DownStream Enhancer	66031443	604214	PDE4B	5142	protein-coding
chr1	66802609	66803015	1#[CATTTCCTCTTTA:235:0.8299308382118781]	1#[AGAGGAAG:118:1.0]	2#[TGACCT:134:1.0] [TGACCG:50:0.8490319803691448]	408	238	26	134.52	18.98	0.05	+	NM_032291	Body	Gene Body	66772412	30435	SGIP1	84251	protein-coding
chr1	66887192	66887576	0#	2#[AGAGGAAC:308:0.9279064825938323] [CTTCCCCA:150:0.925367388796723]	2#[TGACCT:170:1.0] [GGGTCA:137:0.8857896050338628]	386	141	45	402.72	59.8	0.03	+	NM_032291	Body	Gene Body	66772412	114921	SGIP1	84251	protein-coding
chr1	67185793	67185978	1#[CATTTCCTCTTTT:99:0.8772372634060817]	1#[CTTCCTGA:81:0.8653647538446115]	0#	187	80	16	155.72	30.85	0.03	+	NM_001146113	Body	Gene Body	67163165	22708	MIER1	57708	protein-coding
chr1	67168761	67169176	0#	3#[CTTCCTCT:254:1.0000000000000002] [GGAGGAAG:100:0.9250330832242935] [CGGGGAAG:189:0.8336868838942818]	0#	417	259	34	140.97	12.47	0.04	+	NM_001077701	PP	Proximal Promoter	67168513	507	MIER1	57708	protein-coding
chr1	67684372	67684717	1#[AAAGGGGGAAGTG:104:0.8788817133773799]	0#	0#	347	159	24	209.08	48.64	0.04	-	NM_001018067	UE	Upstream Enhancer	67668711	15820	SERBP1	26135	protein-coding
chr1	67873595	67874240	0#	2#[CTTCCCCA:484:0.925367388796723] [GTTCCTCA:120:0.9036193024858946]	2#[AGGTCA:17:1.0] [TGACCG:391:0.8490319803691448]	647	192	38	121.34	7.52	0.07	+	NM_001199742	UE	Upstream Enhancer	67923447	-49660	GADD45A	1647	protein-coding
chr1	67889341	67889735	1#[AAAAAAGGAAGTG:137:0.9266966944468076]	0#	0#	396	153	36	176.82	16.88	0.04	+	NM_001199742	UE	Upstream Enhancer	67923447	-33953	GADD45A	1647	protein-coding
chr1	67924138	67924544	0#	2#[GGAGGAAG:182:0.9250330832242935] [CTTCCTGT:353:0.8896519339525494]	0#	408	195	36	165.13	15.26	0.03	+	NM_001199742	PP	Proximal Promoter	67923447	886	GADD45A	1647	protein-coding
chr1	67926988	67927481	0#	0#	1#[AGGTCA:5:1.0]	495	302	49	371.4	47.37	0.03	+	NM_001199742	DE	DownStream Enhancer	67923447	3843	GADD45A	1647	protein-coding
chr1	70241770	70242051	0#	2#[CTTCCCCA:200:0.925367388796723] [CTTCCTCC:184:0.9250330832242935]	0#	283	201	28	202.39	29.72	0.03	+	NM_020794	Body	Gene Body	69998445	243526	LRRC7	57554	protein-coding
chr1	70280146	70280310	0#	0#	0#	166	83	13	111.44	25.09	0.1	+	NM_020794	Body	Gene Body	69998445	281784	LRRC7	57554	protein-coding
chr1	70321754	70322247	0#	2#[CTTCCTCA:302:0.9757128198920624] [CTTCCCCA:241:0.925367388796723]	3#[TGACCT:50:1.0] [TGACCT:71:1.0] [TGACCA:280:0.8180826906887997]	495	255	72	536.03	45.09	0	+	NM_020794	Body	Gene Body	69998445	323564	LRRC7	57554	protein-coding
chr1	70458297	70458677	0#	1#[AGAGGAAG:168:1.0]	1#[TGACCC:93:0.8857896050338628]	382	199	49	371.88	36.65	0.03	+	NM_001190987	Body	Gene Body	70443952	14544	SRSF11	9295	protein-coding
chr1	70675170	70675438	0#	2#[GGAGGAAG:150:0.9250330832242935] [TTTCCTCA:254:0.8667187803472263]	2#[AGGTCA:71:1.0] [TGACCT:216:1.0]	270	176	26	134.52	18.05	0.05	+	NM_001902	Body	Gene Body	70649488	25858	CTH	1491	protein-coding
chr1	71319518	71319686	0#	2#[CTTCCGCT:89:0.9370344629705614] [GGCGGAAG:123:0.8620675461948546]	0#	170	85	19	172.71	31.56	0.03	+	NR_046217	PP	Proximal Promoter	71319594	9	ZRANB2-AS2	100852410	miscRNA
chr1	71616222	71616494	1#[CACTTCCCCTTTT:139:0.959771347207595]	3#[CTTCCCCT:191:0.9496545689046608] [CTTCCTGT:245:0.8896519339525494] [CTTCCCCC:71:0.874687652128954]	0#	274	167	28	230.55	38.23	0.03	-	NM_173808	DE	DownStream Enhancer	72520865	-904476	NEGR1	257194	protein-coding
chr1	71652384	71652997	1#[CACTTCCCTTTTT:260:0.886468041654403]	0#	0#	615	237	86	829.63	83.06	0	-	NM_173808	Body	Gene Body	72520865	-868244	NEGR1	257194	protein-coding
chr1	71715694	71715994	1#[GACTTCCTCTTTC:143:0.8751137954250418]	0#	0#	302	122	47	566.4	87.03	0	-	NM_173808	Body	Gene Body	72520865	-805049	NEGR1	257194	protein-coding
chr1	71740388	71740713	1#[CAATGAGGAACTG:227:0.8139123822215973]	0#	2#[AGGTCA:53:1.0] [GGGTCA:85:0.8857896050338628]	327	82	24	145.13	13.94	0.04	-	NM_173808	Body	Gene Body	72520865	-780395	NEGR1	257194	protein-coding
chr1	72030547	72030818	1#[CACTTCCTCTTTT:195:1.0]	0#	1#[TGACCA:254:0.8180826906887997]	273	188	32	358.16	69.12	0.03	-	NM_173808	Body	Gene Body	72520865	-490130	NEGR1	257194	protein-coding
chr1	72338972	72339401	0#	1#[CTTCCTCT:263:1.0000000000000002]	1#[TGACCT:312:1.0]	431	260	50	336.89	36.08	0.02	-	NM_173808	Body	Gene Body	72520865	-181633	NEGR1	257194	protein-coding
chr1	72516849	72517071	0#	1#[CTTCCTGT:89:0.8896519339525494]	0#	224	91	25	268.35	53.76	0.04	-	NM_173808	Body	Gene Body	72520865	-3925	NEGR1	257194	protein-coding
chr1	72519513	72519823	1#[GAATGTGGAAGTG:116:0.8302893806277314]	1#[AGGGGAAC:231:0.8775610514984932]	1#[TGACCA:241:0.8180826906887997]	312	107	20	142.14	23.58	0.04	-	NM_173808	Body	Gene Body	72520865	-1245	NEGR1	257194	protein-coding
chr1	74436550	74436867	1#[CACTTCCCGTTTA:163:0.8373406622521214]	0#	0#	319	161	31	263.66	38.21	0.04	+	NM_001199327	PP	Proximal Promoter	74436483	228	FPGT-TNNI3K	100526835	protein-coding
chr1	74437897	74438081	0#	0#	0#	186	109	13	117.58	27.91	0.08	+	NM_001199327	Body	Gene Body	74436483	1523	FPGT-TNNI3K	100526835	protein-coding
chr1	75511393	75511742	1#[GACTTCCTCTTTT:220:0.891331783801081]	0#	1#[TGGTCA:64:0.8180826906887997]	351	214	28	257.4	53.76	0.04	-	NM_152697	Body	Gene Body	75849387	-337780	SLC44A5	204962	protein-coding
chr1	75632764	75633055	1#[AGAAGAGGAAGTG:95:0.8495334147564026]	0#	1#[AGGTCA:74:1.0]	293	111	19	156.74	34.88	0.03	-	NM_152697	Body	Gene Body	75849387	-216512	SLC44A5	204962	protein-coding
chr1	75676700	75677051	1#[AGAAGAGGAAGTG:104:0.8495334147564026]	0#	1#[TGACCT:142:1.0]	353	135	48	360.82	42.07	0.03	-	NM_152697	Body	Gene Body	75849387	-172552	SLC44A5	204962	protein-coding
chr1	76181369	76181797	1#[GACTTCCTCTTTT:80:0.891331783801081]	0#	0#	430	127	72	884.25	104.95	0	-	NR_026546	UE	Upstream Enhancer	76170704	10792	ASB17	127247	protein-coding
chr1	76479559	76479810	0#	3#[AGAGGAAG:112:1.0] [CTTCCCCA:207:0.925367388796723] [CTTCCACT:54:0.8808814310639483]	0#	253	131	17	151.91	30.72	0.04	+	NM_001160011	Body	Gene Body	76312976	166714	ST6GALNAC3	256435	protein-coding
chr1	76710677	76710938	0#	1#[TTTCCTCT:219:0.8910059604551641]	0#	263	75	17	149.07	35.84	0.04	+	NM_001160011	Body	Gene Body	76312976	397776	ST6GALNAC3	256435	protein-coding
chr1	76739875	76740170	0#	1#[AGAGGAAG:122:1.0]	0#	297	142	23	212.34	40.96	0.04	+	NM_001160011	Body	Gene Body	76312976	427041	ST6GALNAC3	256435	protein-coding
chr1	77115002	77115410	0#	1#[CTTCCTCA:216:0.9757128198920624]	1#[TGACCC:383:0.8857896050338628]	410	214	25	154.52	20.66	0.03	+	NM_030965	Body	Gene Body	77105773	9443	ST6GALNAC5	81849	protein-coding
chr1	77286601	77286810	1#[CACTTCCTCTTCT:131:0.8495334147564029]	0#	0#	211	115	31	224.57	18.81	0.03	+	NM_030965	Body	Gene Body	77105773	180943	ST6GALNAC5	81849	protein-coding
chr1	77427131	77427336	1#[GAAACAGGAACTG:121:0.8233260908468145]	0#	1#[TGACCA:109:0.8180826906887997]	207	123	14	129	30.72	0.07	-	NM_005482	Body	Gene Body	77457720	-30466	PIGK	10026	protein-coding
chr1	77491575	77491886	1#[GAAAGAGGAACTG:62:0.8984503506080849]	1#[AGAGGAAC:221:0.9279064825938323]	0#	313	83	17	136.39	38.4	0.05	+	NM_174858	UE	Upstream Enhancer	77520249	-28591	AK5	26289	protein-coding
chr1	77525916	77526166	0#	0#	0#	252	132	24	145.13	18.56	0.04	+	NM_174858	Body	Gene Body	77520249	5799	AK5	26289	protein-coding
chr1	77547478	77547860	1#[CACTTCCTGTTTT:206:0.9248757402387298]	1#[TTTCCTCA:241:0.8667187803472263]	0#	384	209	41	354.56	58.14	0.03	+	NM_174858	Body	Gene Body	77520249	27438	AK5	26289	protein-coding
chr1	77651941	77652394	2#[TAAAGTGGAAGTG:436:0.8579728988547443] [CACTTCCCCTTCT:197:0.8093047619639978]	1#[CTTCTTCT:126:0.8392187832339122]	1#[AGGTCA:368:1.0]	455	212	61	522.81	50.26	0	+	NM_174858	Body	Gene Body	77520249	131904	AK5	26289	protein-coding
chr1	77653783	77654199	0#	2#[GTTCCTCA:169:0.9036193024858946] [TTTCCTCT:399:0.8910059604551641]	2#[TGACCT:141:1.0] [TGACCT:361:1.0]	418	186	61	418.66	33.21	0.03	+	NM_174858	Body	Gene Body	77520249	133720	AK5	26289	protein-coding
chr1	77765442	77765787	1#[CACTTCCTCCTTT:104:0.919110366169785]	2#[CTTCCTCT:231:1.0000000000000002] [AGAAGAAG:281:0.839218783233912]	0#	347	123	21	165.06	25.58	0.03	+	NM_174858	Body	Gene Body	77520249	245316	AK5	26289	protein-coding
chr1	77772726	77773113	0#	2#[TGAGGAAG:192:0.9757128198920622] [AGAGGAAA:20:0.8910059604551641]	0#	389	212	25	111.54	15.5	0.1	+	NM_174858	Body	Gene Body	77520249	252689	AK5	26289	protein-coding
chr1	78216971	78217539	0#	2#[CTTCCTCT:343:1.0000000000000002] [TTTCCTCT:91:0.8910059604551641]	0#	570	330	39	159.17	14.95	0.03	-	NM_003902	PP	Proximal Promoter	78217365	-64	FUBP1	8880	protein-coding
chr1	78299364	78299707	0#	1#[AGAGGAAG:199:1.0]	0#	345	193	26	203.72	40.7	0.03	+	NM_017655	Body	Gene Body	78284176	15381	GIPC2	54810	protein-coding
chr1	78381412	78381853	0#	1#[CTTCCTCT:247:1.0000000000000002]	2#[TGACCT:8:1.0] [TGGTCA:163:0.8180826906887997]	443	274	28	127.69	17.51	0.06	+	NM_017655	DE	DownStream Enhancer	78284176	97510	GIPC2	54810	protein-coding
chr1	78878724	78879090	1#[CACTTCCTCTTTT:229:1.0]	2#[TTTCCTCA:63:0.8667187803472263] [TTTCCCCT:284:0.8406605293598248]	1#[TGACCA:292:0.8180826906887997]	368	225	32	315.88	66.56	0.02	+	NM_006820	Body	Gene Body	78858675	20274	IFI44L	10964	protein-coding
chr1	81995663	81995993	1#[CACTTCCCTTTTT:191:0.886468041654403]	0#	0#	332	203	17	112.36	23.26	0.1	+	NM_012302	UE	Upstream Enhancer	82038669	-42803	LPHN2	23266	protein-coding
chr1	84604037	84604410	0#	1#[CTTCCTGT:216:0.8896519339525494]	2#[TGACCT:21:1.0] [TGACCC:351:0.8857896050338628]	375	218	30	151.54	13.08	0.04	-	NR_003927	Body	Gene Body	84636164	-31909	UOX	391051	pseudo
chr1	84675577	84675901	0#	1#[AGGGGAAG:167:0.9496545689046608]	0#	326	202	26	207.46	34.12	0.03	+	NM_025065	UE	Upstream Enhancer	84717507	-41728	RPF1	80135	protein-coding
chr1	84698422	84698901	0#	3#[AGAGGAAG:78:1.0] [CTTCCCCA:406:0.925367388796723] [CTTCCCCA:418:0.925367388796723]	1#[AGGTCA:337:1.0]	481	104	37	245.21	26.57	0.03	+	NM_025065	UE	Upstream Enhancer	84717507	-18981	RPF1	80135	protein-coding
chr1	84700369	84700828	1#[CACTTCCTCCTTT:201:0.919110366169785]	0#	0#	461	219	78	937.72	145.35	0	+	NM_025065	UE	Upstream Enhancer	84717507	-16919	RPF1	80135	protein-coding
chr1	84744778	84745151	0#	0#	3#[TGACCC:162:0.8857896050338628] [TGACCC:218:0.8857896050338628] [TGACCA:19:0.8180826906887997]	375	101	32	145.38	13.08	0.04	-	NM_005274	PP	Proximal Promoter	84744850	29	GNG5	2787	protein-coding
chr1	84812828	84813145	0#	0#	0#	319	234	53	367.91	27.45	0.03	-	NM_004388	PP	Proximal Promoter	84812751	311	CTBS	1486	protein-coding
chr1	84938273	84938754	0#	3#[CTTCCTCT:371:1.0000000000000002] [CTTCCTGT:109:0.8896519339525494] [AGAAGAAG:260:0.839218783233912]	0#	483	247	43	267.46	37.07	0.04	-	NM_001166417	UE	Upstream Enhancer	84928739	9781	SSX2IP	117178	protein-coding
chr1	84943194	84943577	0#	2#[AGAGGAAG:119:1.0] [GGCGGAAG:183:0.8620675461948546]	0#	385	172	42	342.35	47.97	0.02	-	NM_001166417	UE	Upstream Enhancer	84928739	14627	SSX2IP	117178	protein-coding
chr1	84974777	84975135	1#[AAAAGAGGAAGTG:129:0.9999999999999994]	1#[GTTCCCCT:335:0.8775610514984932]	1#[TGACCA:53:0.8180826906887997]	360	131	24	205.33	35.84	0.03	-	NM_001166417	UE	Upstream Enhancer	84928739	46169	SSX2IP	117178	protein-coding
chr1	85227037	85227319	0#	3#[CTTCCCCT:57:0.9496545689046608] [CTTCCCCA:256:0.925367388796723] [CTTCCTGT:179:0.8896519339525494]	0#	284	105	17	123.39	21.32	0.07	-	NM_153259	Body	Gene Body	85235384	-8242	MCOLN2	255231	protein-coding
chr1	85514226	85514658	0#	1#[CTTCCGCT:272:0.9370344629705614]	0#	434	273	57	142.7	10.09	0.04	+	NR_045484	PP	Proximal Promoter	85514628	-129	LOC646626	646626	miscRNA
chr1	85514704	85515357	0#	4#[CTTCCTCA:383:0.9757128198920624] [TGGGGAAG:8:0.925367388796723] [TTTCCTCA:334:0.8667187803472263] [GTTCCTCC:503:0.8529395658181256]	2#[GGGTCA:80:0.8857896050338628] [TGGTCA:568:0.8180826906887997]	655	427	37	126.47	10.8	0.07	+	NR_045484	PP	Proximal Promoter	85514628	503	LOC646626	646626	miscRNA
chr1	86229475	86229845	1#[AAAGGAGGAACTG:215:0.8337787051539092]	0#	1#[TGACCT:308:1.0]	372	231	34	326.53	55.81	0.02	-	NM_152890	Body	Gene Body	86394709	-165003	COL24A1	255631	protein-coding
chr1	86577543	86578051	1#[CACTTCCTGTTTA:327:0.8775693150445262]	0#	1#[TGGTCA:78:0.8180826906887997]	510	301	46	191.11	12.52	0.04	-	NM_001184765	DE	DownStream Enhancer	86634613	-56769	ODF2L	57489	protein-coding
chr1	86855185	86855671	2#[GAAAGAGGAAGTG:198:0.9837820116239603] [GAAAGGGGAAGTG:150:0.9435533588315553]	1#[AGGGGAAA:268:0.8406605293598248]	0#	488	208	141	2063.75	232.95	0	+	NR_024604	UE	Upstream Enhancer	86872546	-17153	CLCA3P	9629	pseudo
chr1	86993834	86994503	1#[AAAAGGGGAAGTG:431:0.9597713472075948]	3#[GTTCCTCT:249:0.9279064825938323] [CTTCCCCA:229:0.925367388796723] [GTTCCCCA:241:0.8532738713905553]	2#[TGACCC:491:0.8857896050338628] [CGGTCA:136:0.8490319803691448]	671	456	71	598.17	64.78	0	+	NM_001206653	DE	DownStream Enhancer	86942840	51450	SH3GLB1	51100	protein-coding
chr1	87012487	87013132	0#	3#[CTTCCCCC:313:0.874687652128954] [CTTCCCCC:630:0.874687652128954] [ATTCCTCT:34:0.840598909800833]	0#	647	186	51	315.58	27.13	0.02	+	NM_001206653	DE	DownStream Enhancer	86942840	69833	SH3GLB1	51100	protein-coding
chr1	87060817	87061175	0#	1#[CTTCCTCT:125:1.0000000000000002]	0#	360	129	90	1185.99	142.33	0	-	NM_004261	DE	DownStream Enhancer	87152695	-91749	SEPT15	9403	protein-coding
chr1	87290737	87291035	1#[TAAAGAGGAACTG:126:0.8673619137899203]	1#[TGAGGAAG:176:0.9757128198920622]	2#[TGACCA:9:0.8180826906887997] [TGACCA:244:0.8180826906887997]	300	164	17	112.08	19.19	0.1	+	NM_012262	Body	Gene Body	87152922	137979	HS2ST1	9653	protein-coding
chr1	87329742	87330096	1#[AAAAAGGGAAGTG:145:0.8864680416544026]	0#	1#[AGGTCA:182:1.0]	356	165	29	245.95	42.64	0.03	+	NM_012262	Body	Gene Body	87152922	176985	HS2ST1	9653	protein-coding
chr1	87386632	87387379	1#[CACTTCCCTATTT:504:0.8276960866092257]	5#[CTTCCCCT:23:0.9496545689046608] [CTTCCCCT:291:0.9496545689046608] [CTTCCCCA:41:0.925367388796723] [CTTCCACA:538:0.8565942509560106] [TTTCCCCT:52:0.8406605293598248]	1#[TGACCA:403:0.8180826906887997]	749	506	62	349.05	32.77	0.03	+	NR_026989	Body	Gene Body	87368035	19103	LOC339524	339524	miscRNA
chr1	87418055	87418898	0#	3#[TGAGGAAG:303:0.9757128198920622] [CTTCCCCT:490:0.9496545689046608] [GGAGGAAC:148:0.8529395658181258]	1#[TGACCC:281:0.8857896050338628]	845	498	63	408.49	30.52	0.03	+	NR_026989	DE	DownStream Enhancer	87368035	50518	LOC339524	339524	miscRNA
chr1	87424677	87424980	0#	2#[TGAGGAAC:222:0.9036193024858946] [CTTCCTGT:116:0.8896519339525494]	0#	305	130	17	112.08	23.05	0.1	+	NR_026989	DE	DownStream Enhancer	87368035	56772	LOC339524	339524	miscRNA
chr1	87568037	87568381	0#	0#	1#[TGGTCA:315:0.8180826906887997]	346	146	24	147.04	28.73	0.04	+	NM_006769	Body	Gene Body	87566738	1445	LMO4	8543	protein-coding
chr1	87584786	87585008	1#[CACTTCCTGTTTT:111:0.9248757402387298]	1#[AGGGGAAA:139:0.8406605293598248]	0#	224	81	16	148.4	38.4	0.04	+	NM_006769	Body	Gene Body	87566738	18129	LMO4	8543	protein-coding
chr1	88885540	88886028	0#	1#[AGGGGAAC:251:0.8775610514984932]	2#[AGGTCA:125:1.0] [AGGTCA:205:1.0]	490	255	65	384.05	33.47	0.03	+	NM_006256	UE	Upstream Enhancer	88922509	-36714	PKN2	5586	protein-coding
chr1	88939543	88939910	1#[CAGTTCCTTTTTT:162:0.8413650334309319]	0#	0#	369	176	20	156.91	25.6	0.03	+	NM_006256	Body	Gene Body	88922509	17210	PKN2	5586	protein-coding
chr1	89040114	89040385	0#	1#[AGAGGAAG:125:1.0]	0#	273	196	14	112.18	28.16	0.1	+	NM_006256	Body	Gene Body	88922509	117801	PKN2	5586	protein-coding
chr1	89400914	89401089	1#[GACTTCCTCTTTT:77:0.891331783801081]	0#	0#	177	103	15	137.29	28.81	0.04	-	NM_207398	Body	Gene Body	89414311	-13294	GBP7	388646	protein-coding
chr1	89444659	89444989	1#[CACTTCCCCTTTC:180:0.9435533588315557]	2#[CTTCCCCT:235:0.9496545689046608] [CTTCCTGT:289:0.8896519339525494]	0#	332	192	41	406.85	50.19	0.03	-	NM_052941	UE	Upstream Enhancer	89437221	7630	GBP4	115361	protein-coding
chr1	89722786	89723140	0#	2#[AGAGGAAC:183:0.9279064825938323] [GGGGGAAG:141:0.8746876521289542]	1#[TGACCC:344:0.8857896050338628]	356	211	39	229.83	25.67	0.03	+	NM_001134476	UE	Upstream Enhancer	89762984	-39987	LRRC8B	23507	protein-coding
chr1	89763135	89763822	0#	3#[GTTCCGCT:400:0.8649409455643936] [TTTCCCCT:642:0.8406605293598248] [AGAAGAAG:625:0.839218783233912]	3#[AGGTCA:674:1.0] [GGGTCA:286:0.8857896050338628] [CGGTCA:326:0.8490319803691448]	689	405	60	226.66	20.34	0.03	+	NM_001134476	PP	Proximal Promoter	89762984	556	LRRC8B	23507	protein-coding
chr1	89830953	89831323	0#	2#[CTTCCTCT:187:1.0000000000000002] [CTTCCTCC:112:0.9250330832242935]	1#[AGGTCA:354:1.0]	372	137	28	230.55	49.74	0.03	+	NM_001134476	Body	Gene Body	89762984	68106	LRRC8B	23507	protein-coding
chr1	89870729	89871327	0#	2#[GGAGGAAG:338:0.9250330832242935] [GGAGGAAG:577:0.9250330832242935]	1#[TGACCC:7:0.8857896050338628]	600	350	40	169.81	21.47	0.03	-	NR_033981	PP	Proximal Promoter	89871041	38	FLJ27354	400761	miscRNA
chr1	89930848	89931390	1#[GAAACAGGAACTG:286:0.8233260908468145]	1#[AGGGGAAA:383:0.8406605293598248]	3#[AGGTCA:147:1.0] [GGGTCA:473:0.8857896050338628] [TGACCA:221:0.8180826906887997]	544	306	72	536.03	52.71	0	+	NM_032270	Body	Gene Body	89871231	59923	LRRC8C	84230	protein-coding
chr1	90037622	90037918	0#	0#	1#[TGACCA:161:0.8180826906887997]	298	161	32	191.35	17.44	0.04	+	NM_001134479	UE	Upstream Enhancer	90059160	-21377	LRRC8D	55144	protein-coding
chr1	90038328	90038936	1#[GAAAGAGGAAGTG:234:0.9837820116239603]	2#[AGTGGAAG:219:0.8808814310639483] [GGAGGAAC:535:0.8529395658181258]	2#[AGGTCA:322:1.0] [TGACCA:181:0.8180826906887997]	610	249	54	252.49	23.64	0.03	+	NM_001134479	UE	Upstream Enhancer	90059160	-20583	LRRC8D	55144	protein-coding
chr1	90042891	90043223	0#	0#	0#	334	152	40	239.09	21.75	0.03	+	NM_001134479	UE	Upstream Enhancer	90059160	-16117	LRRC8D	55144	protein-coding
chr1	90048432	90048706	0#	2#[CTTCCTCT:224:1.0000000000000002] [GGAGGAAG:194:0.9250330832242935]	2#[TGACCT:43:1.0] [TGACCT:104:1.0]	276	190	28	221.92	34.29	0.03	+	NM_001134479	UE	Upstream Enhancer	90059160	-10538	LRRC8D	55144	protein-coding
chr1	90053801	90054277	0#	1#[CTTCCTCT:175:1.0000000000000002]	0#	478	231	43	306.83	45.85	0.02	+	NM_001134479	UE	Upstream Enhancer	90059160	-5128	LRRC8D	55144	protein-coding
chr1	90059463	90059990	0#	3#[CTTCCTGT:454:0.8896519339525494] [GTTCCGCT:192:0.8649409455643936] [GTTCCTCC:357:0.8529395658181256]	0#	529	194	32	171.53	15.17	0.03	+	NM_001134479	PP	Proximal Promoter	90059160	497	LRRC8D	55144	protein-coding
chr1	90081303	90082183	1#[CAAACAGGAAGTG:475:0.8828917385213799]	4#[GGAGGAAG:145:0.9250330832242935] [CTTCCTCC:418:0.9250330832242935] [GGCGGAAG:807:0.8620675461948546] [CTTCCCCG:51:0.8336868838942818]	1#[TGACCC:381:0.8857896050338628]	882	491	97	550.3	30.73	0	+	NM_001134479	Body	Gene Body	90059160	22634	LRRC8D	55144	protein-coding
chr1	90085421	90085795	0#	2#[CTTCCCCT:40:0.9496545689046608] [AGAGGAAA:105:0.8910059604551641]	1#[TGGTCA:59:0.8180826906887997]	376	145	27	120.03	18.36	0.08	+	NM_001134479	Body	Gene Body	90059160	26406	LRRC8D	55144	protein-coding
chr1	90213738	90214040	0#	2#[GGAGGAAG:103:0.9250330832242935] [TTTCCTCA:225:0.8667187803472263]	1#[AGGTCA:159:1.0]	304	188	19	139.18	29.07	0.04	-	NR_002830	DE	DownStream Enhancer	90233113	-19187	GEMIN8P4	492303	pseudo
chr1	91256133	91256391	0#	2#[CTTCCTCT:97:1.0000000000000002] [AGGGGAAG:181:0.9496545689046608]	0#	260	177	15	113.04	18.69	0.1	-	NM_016620	Body	Gene Body	91259653	-3343	ZNF644	84146	protein-coding
chr1	91738023	91738498	0#	2#[GTTCCTCT:232:0.9279064825938323] [CTTCCCCC:186:0.874687652128954]	2#[TGACCA:331:0.8180826906887997] [TGGTCA:354:0.8180826906887997]	477	225	63	336.02	30.81	0.02	+	NM_003503	PP	Proximal Promoter	91738991	-743	CDC7	8317	protein-coding
chr1	91967751	91968192	0#	1#[CTTCCTCA:242:0.9757128198920624]	0#	443	236	28	113.06	14.31	0.1	-	NM_003243	Body	Gene Body	92124424	-156437	TGFBR3	7049	protein-coding
chr1	92102573	92103028	1#[CAAAAGGGAAGTG:201:0.8444840399370531]	1#[TGAGGAAG:24:0.9757128198920622]	1#[TGACCT:433:1.0]	457	218	33	176.57	28.7	0.04	-	NM_003243	Body	Gene Body	92124424	-21633	TGFBR3	7049	protein-coding
chr1	92416447	92416736	0#	1#[AGAGGAAC:74:0.9279064825938323]	0#	291	83	27	266.45	58.88	0.04	+	NM_015237	Body	Gene Body	92405196	11334	KIAA1107	23285	protein-coding
chr1	92601096	92601532	0#	1#[TGAGGAAC:233:0.9036193024858946]	0#	438	217	21	130.5	31.53	0.06	+	NM_024813	Body	Gene Body	92537109	64204	RPAP2	79871	protein-coding
chr1	92697835	92698347	0#	4#[GGAGGAAG:485:0.9250330832242935] [TCAGGAAG:224:0.8653647538446115] [CTTCCTGA:240:0.8653647538446115] [CTTCCTGA:410:0.8653647538446115]	1#[TGACCT:44:1.0]	514	273	30	130.39	12.95	0.06	-	NM_005263	DE	DownStream Enhancer	92725021	-26913	GFI1	2672	protein-coding
chr1	92757221	92757550	1#[GAAAGAGGAAGTC:133:0.8751137954250415]	0#	0#	331	161	32	290.78	48.11	0.04	-	NM_005665	Body	Gene Body	93030549	-273167	EVI5	7813	protein-coding
chr1	92780074	92780369	0#	1#[CTTCCTCA:119:0.9757128198920624]	0#	297	118	40	294.77	31.98	0.04	-	NM_005665	Body	Gene Body	93030549	-250357	EVI5	7813	protein-coding
chr1	92901981	92902362	0#	1#[TTTCCTCT:217:0.8910059604551641]	0#	383	208	37	354.16	69.03	0.03	-	NM_005665	Body	Gene Body	93030549	-128360	EVI5	7813	protein-coding
chr1	92946514	92946797	0#	1#[GTTCCTCA:191:0.9036193024858946]	0#	285	185	32	352.04	74.24	0.03	-	NM_005665	Body	Gene Body	93030549	-83850	EVI5	7813	protein-coding
chr1	93091565	93091784	0#	2#[TGGGGAAG:100:0.925367388796723] [AGGGGAAA:15:0.8406605293598248]	0#	221	104	22	126.84	15.42	0.06	-	NM_001252271	Body	Gene Body	93115295	-23626	FAM69A	388650	protein-coding
chr1	93121018	93121394	0#	3#[TGAGGAAG:180:0.9757128198920622] [GGAGGAAG:103:0.9250330832242935] [ACAGGAAG:125:0.8896519339525494]	0#	378	167	68	492.49	30.77	0	-	NM_001252273	Body	Gene Body	93199667	-78482	FAM69A	388650	protein-coding
chr1	93188154	93188456	1#[CACTTCCTCTTTG:124:0.9580159982826505]	1#[AGAGGAAA:226:0.8910059604551641]	1#[GGGTCA:66:0.8857896050338628]	304	82	28	230.55	30.05	0.03	-	NM_001252273	Body	Gene Body	93199667	-11431	FAM69A	388650	protein-coding
chr1	93196366	93196689	0#	1#[CTTCCTGT:306:0.8896519339525494]	1#[TGACCC:184:0.8857896050338628]	325	190	25	192.05	32.7	0.04	-	NM_001252273	Body	Gene Body	93199667	-3111	FAM69A	388650	protein-coding
chr1	93418156	93418797	0#	3#[TTTCCTCT:291:0.8910059604551641] [CTTCCCCC:524:0.874687652128954] [CGGGGAAG:201:0.8336868838942818]	0#	643	394	39	114.74	9.52	0.1	-	NR_030761	PP	Proximal Promoter	93418834	-284	TMED5	50999	protein-coding
chr1	93583202	93583596	0#	1#[TTTCCCCT:68:0.8406605293598248]	0#	396	169	20	115.55	23.26	0.09	-	NR_034089	PP	Proximal Promoter	93583956	-585	LOC100131564	100131564	miscRNA
chr1	93766460	93766921	1#[AAATGAGGAAGTG:254:0.9412280449548224]	1#[ACAGGAAG:68:0.8896519339525494]	1#[GGGTCA:31:0.8857896050338628]	463	275	101	823.09	51.53	0	+	NM_017737	Body	Gene Body	93686275	80460	FNBP1L	54874	protein-coding
chr1	93797151	93797635	0#	0#	0#	486	245	35	197.85	26.74	0.04	-	NM_001261409	DE	DownStream Enhancer	93919514	-122118	BCAR3	8412	protein-coding
chr1	93944064	93944502	0#	1#[CTTCCTCC:179:0.9250330832242935]	1#[GGGTCA:204:0.8857896050338628]	440	167	65	571.66	57.56	0	-	NM_001261408	Body	Gene Body	94085294	-141063	BCAR3	8412	protein-coding
chr1	93989140	93989489	0#	5#[GGAGGAAG:124:0.9250330832242935] [GGAGGAAG:198:0.9250330832242935] [ACAGGAAG:292:0.8896519339525494] [CTTCCACT:322:0.8808814310639483] [TGAGGAAA:154:0.8667187803472263]	2#[TGACCA:35:0.8180826906887997] [TGACCA:110:0.8180826906887997]	351	220	34	323.74	49.53	0.02	-	NM_001261408	Body	Gene Body	94085294	-95934	BCAR3	8412	protein-coding
chr1	94055138	94055465	0#	2#[CTTCCTGT:168:0.8896519339525494] [GTTCCGCA:54:0.8406537654564559]	1#[GGGTCA:276:0.8857896050338628]	329	94	30	214.14	22.95	0.04	-	NM_001261408	Body	Gene Body	94085294	-30062	BCAR3	8412	protein-coding
chr1	94117081	94117547	0#	0#	1#[CGGTCA:351:0.8490319803691448]	468	233	36	122.53	16.33	0.07	-	NM_014597	PP	Proximal Promoter	94117350	-36	DNTTIP2	30836	protein-coding
chr1	94226900	94227348	0#	3#[CTTCCTCT:241:1.0000000000000002] [TTTCCTCT:217:0.8910059604551641] [CTTCTTCT:203:0.8392187832339122]	1#[TGACCA:376:0.8180826906887997]	450	219	24	116.9	16.8	0.08	-	NM_000350	DE	DownStream Enhancer	94359293	-132174	ABCA4	24	protein-coding
chr1	94299643	94300050	0#	1#[CTTCCCCA:168:0.925367388796723]	1#[TGACCC:131:0.8857896050338628]	409	181	33	206.28	32.1	0.03	-	NM_000350	Body	Gene Body	94359293	-59469	ABCA4	24	protein-coding
chr1	94340244	94340700	0#	3#[TCAGGAAG:365:0.8653647538446115] [CTTCCTGA:375:0.8653647538446115] [AGAAGAAG:167:0.839218783233912]	2#[AGGTCA:144:1.0] [TGACCC:12:0.8857896050338628]	458	206	26	111.79	15.86	0.1	-	NM_000350	Body	Gene Body	94359293	-18843	ABCA4	24	protein-coding
chr1	94474287	94474598	0#	2#[AGAGGAAG:136:1.0] [GTTCCTCA:237:0.9036193024858946]	1#[TGACCA:203:0.8180826906887997]	313	147	21	182.78	43.52	0.04	-	NM_004815	Body	Gene Body	94475895	-1461	ARHGAP29	9411	protein-coding
chr1	94701161	94701580	1#[GACTTCCTTTTTT:278:0.8180284782478887]	1#[GTTCCTCC:226:0.8529395658181256]	0#	421	228	30	132.42	13.29	0.05	+	NM_001122674	Body	Gene Body	94656520	44869	ABCD3	5825	protein-coding
chr1	95013507	95013896	0#	2#[CTTCCACT:247:0.8808814310639483] [TTTCCCCT:238:0.8406605293598248]	1#[AGGTCA:152:1.0]	391	244	44	277.11	27.28	0.04	+	NM_001258343	UE	Upstream Enhancer	95058485	-44734	SLC44A3	126969	protein-coding
chr1	95030674	95030938	0#	2#[CTTCCTCC:178:0.9250330832242935] [ACAGGAAG:221:0.8896519339525494]	1#[TGACCA:29:0.8180826906887997]	266	89	23	221.99	45.5	0.03	+	NM_001258343	UE	Upstream Enhancer	95058485	-27722	SLC44A3	126969	protein-coding
chr1	95044626	95045032	0#	3#[CTTCCTCT:167:1.0000000000000002] [AGAGGAAA:78:0.8910059604551641] [GTTCCCCT:159:0.8775610514984932]	0#	408	159	32	145.38	15.02	0.04	+	NM_001258343	UE	Upstream Enhancer	95058485	-13700	SLC44A3	126969	protein-coding
chr1	95069714	95070153	0#	0#	1#[AGGTCA:389:1.0]	441	277	108	1165.86	99.99	0	+	NM_001258343	Body	Gene Body	95058485	11506	SLC44A3	126969	protein-coding
chr1	95200947	95201325	0#	0#	1#[TGACCA:265:0.8180826906887997]	380	210	34	296.47	52.33	0.04	+	NR_033998	Body	Gene Body	95166171	34986	LOC729970	729970	miscRNA
chr1	95472126	95472565	0#	1#[AGCGGAAG:210:0.9370344629705611]	1#[TGACCC:54:0.8857896050338628]	441	229	36	220.93	30.23	0.03	+	NM_001199682	PP	Proximal Promoter	95472298	57	RWDD3	25950	protein-coding
chr1	97923584	97923858	1#[AAAAGAGGAAGTC:95:0.8913317838010807]	0#	0#	276	115	29	313.98	64	0.02	-	NM_000110	Body	Gene Body	98159203	-235504	DPYD	1806	protein-coding
chr1	98316706	98317187	1#[AAAAGAGGAAGTG:205:0.9999999999999994]	0#	0#	483	231	57	623.83	87.03	0	-	NR_029679	UE	Upstream Enhancer	98284315	32622	MIR137	406928	miscRNA
chr1	98419952	98420344	1#[CACTTCCCATTTT:178:0.8660989017509266]	1#[AGTGGAAG:327:0.8808814310639483]	0#	394	170	17	119.91	30.72	0.08	+	NR_046088	UE	Upstream Enhancer	98448854	-28732	LOC729987	729987	miscRNA
chr1	98526634	98526960	1#[AGAAGAGGAAGTG:193:0.8495334147564026]	1#[CTTCCCCC:248:0.874687652128954]	0#	328	207	35	328.46	53.4	0.02	+	NR_046088	DE	DownStream Enhancer	98448854	77987	LOC729987	729987	miscRNA
chr1	99345550	99345880	1#[CACTTCCCCCTTC:205:0.8626637250013409]	4#[CTTCCCCT:260:0.9496545689046608] [TGAGGAAC:313:0.9036193024858946] [GGGGGAAG:242:0.8746876521289542] [CTTCCCCC:142:0.874687652128954]	1#[GGGTCA:106:0.8857896050338628]	332	242	25	154.52	16.73	0.03	+	NR_033940	Body	Gene Body	99242419	103373	LOC100129620	100129620	miscRNA
chr1	99109701	99110095	1#[AAAACAGGAAATG:205:0.8021130036448111]	0#	0#	396	85	31	292.82	38.4	0.04	-	NM_001010861	DE	DownStream Enhancer	99243037	-133251	LPPR5	163404	protein-coding
chr1	99120075	99120385	0#	2#[CTTCCCCT:169:0.9496545689046608] [TGGGGAAC:226:0.8532738713905553]	0#	312	174	23	207.48	40.96	0.04	-	NM_001010861	DE	DownStream Enhancer	99243037	-122788	LPPR5	163404	protein-coding
chr1	99942463	99942747	0#	0#	1#[TGGTCA:13:0.8180826906887997]	286	142	35	193.87	16.63	0.04	-	NM_001013660	DE	DownStream Enhancer	100003937	-61332	FRRS1	391059	protein-coding
chr1	100032096	100032375	0#	2#[CTTCCTCT:118:1.0000000000000002] [CTTCCTCT:145:1.0000000000000002]	1#[TGGTCA:203:0.8180826906887997]	281	131	43	433.81	53.91	0.03	-	NM_001013660	UE	Upstream Enhancer	100003937	28290	FRRS1	391059	protein-coding
chr1	100074277	100074666	0#	2#[CTTCCTCT:154:1.0000000000000002] [CTTCCTCT:182:1.0000000000000002]	1#[TGGTCA:240:0.8180826906887997]	391	172	16	110.37	25.6	0.1	+	NM_000642	UE	Upstream Enhancer	100088227	-13778	AGL	178	protein-coding
chr1	100239646	100239944	1#[GACTTCCTCTTTT:155:0.891331783801081]	0#	0#	300	190	17	139.47	33.28	0.04	+	NM_012243	Body	Gene Body	100208127	31709	SLC35A3	23443	protein-coding
chr1	100371028	100371354	0#	1#[AGGGGAAG:67:0.9496545689046608]	0#	328	127	22	119.08	17.44	0.08	-	NM_194292	PP	Proximal Promoter	100371099	56	SASS6	163786	protein-coding
chr1	100390541	100390705	0#	2#[GTTCCTCT:48:0.9279064825938323] [GGAGGAAG:77:0.9250330832242935]	0#	166	83	12	109.92	27.91	0.1	-	NM_001256387	Body	Gene Body	100416417	-25793	LRRC39	127495	protein-coding
chr1	100504171	100504603	0#	4#[CTTCCGCT:211:0.9370344629705614] [CTTCCTCG:78:0.8840323149896212] [TGCGGAAC:147:0.8406537654564559] [CTTCCCCG:66:0.8336868838942818]	0#	434	161	44	230.79	18.6	0.03	+	NM_001130841	PP	Proximal Promoter	100504301	31	RTCA	8634	protein-coding
chr1	100566375	100566824	1#[AGAAGAGGAAGTG:129:0.8495334147564026]	1#[TGTGGAAG:308:0.8565942509560106]	1#[TGGTCA:338:0.8180826906887997]	451	170	56	448.15	46.51	0.04	+	NM_003672	UE	Upstream Enhancer	100590610	-24065	CDC14A	8556	protein-coding
chr1	100591287	100591790	0#	2#[CTTCCTCT:236:1.0000000000000002] [CTTCCCCT:285:0.9496545689046608]	2#[CGGTCA:162:0.8490319803691448] [CGGTCA:427:0.8490319803691448]	505	223	55	258.44	16.8	0.04	+	NM_003672	PP	Proximal Promoter	100590610	900	CDC14A	8556	protein-coding
chr1	100620864	100621138	1#[AAAAGGGGAAGTG:70:0.9597713472075948]	0#	0#	276	96	62	722.05	80.23	0	+	NM_003672	Body	Gene Body	100590610	30350	CDC14A	8556	protein-coding
chr1	100638552	100638831	0#	1#[AGAGGAAG:101:1.0]	0#	281	142	50	443.74	38.12	0.03	+	NM_003672	Body	Gene Body	100590610	48084	CDC14A	8556	protein-coding
chr1	100701933	100702551	0#	1#[GTTCCTCA:79:0.9036193024858946]	0#	620	391	37	180.26	16.28	0.04	+	NM_003672	Body	Gene Body	100590610	111714	CDC14A	8556	protein-coding
chr1	100749127	100749745	0#	3#[CTTCCTCT:268:1.0000000000000002] [CTTCCTCT:545:1.0000000000000002] [CTTCCCCC:322:0.874687652128954]	0#	620	324	63	345.03	27.41	0.03	+	NM_003672	Body	Gene Body	100590610	158841	CDC14A	8556	protein-coding
chr1	100761206	100761731	1#[CACTTCCTCTTTC:146:0.9837820116239607]	0#	2#[TGACCA:85:0.8180826906887997] [TGACCA:273:0.8180826906887997]	527	126	122	1091.67	54.28	0	+	NM_003672	DE	DownStream Enhancer	100590610	170722	CDC14A	8556	protein-coding
chr1	100773297	100773768	0#	1#[TCAGGAAG:223:0.8653647538446115]	0#	473	248	60	370.46	27.5	0.03	+	NM_022049	UE	Upstream Enhancer	100776315	-2770	GPR88	54112	protein-coding
chr1	100819212	100819500	0#	3#[TGAGGAAG:137:0.9757128198920622] [TGGGGAAG:119:0.925367388796723] [TTTCCTCA:173:0.8667187803472263]	0#	290	164	20	177.4	46.08	0.04	+	NM_022049	DE	DownStream Enhancer	100776315	43061	GPR88	54112	protein-coding
chr1	100835156	100835788	1#[CACTTCCTCTTTC:176:0.9837820116239607]	1#[GTTCCTCA:341:0.9036193024858946]	1#[TGGTCA:128:0.8180826906887997]	634	171	116	1016.66	85.31	0	-	NR_038914	DE	DownStream Enhancer	100885148	-49821	LOC100128787	100128787	miscRNA
chr1	100956731	100957060	0#	1#[AGAGGAAC:123:0.9279064825938323]	1#[TGACCA:115:0.8180826906887997]	331	156	22	189.64	46.08	0.04	+	NM_001078	PP	Proximal Promoter	100957783	-896	VCAM1	7412	protein-coding
chr1	101191086	101191410	1#[CACTTCCTCCTTC:141:0.9028923777937458]	2#[GGAGGAAG:34:0.9250330832242935] [CTTCCTGT:247:0.8896519339525494]	0#	326	147	16	122.58	33.28	0.07	+	NM_001144884	Body	Gene Body	101134219	57014	SLC30A7	148867	protein-coding
chr1	101495871	101496424	0#	3#[CTTCCTCT:203:1.0000000000000002] [TGGGGAAG:229:0.925367388796723] [TTTCCCCT:453:0.8406605293598248]	2#[TGACCT:380:1.0] [TGACCT:434:1.0]	555	255	55	307.64	27.73	0.02	+	NM_001400	DE	DownStream Enhancer	101474892	21234	S1PR1	1901	protein-coding
chr1	101497919	101498240	0#	2#[CTTCCTCC:296:0.9250330832242935] [TGGGGAAC:66:0.8532738713905553]	0#	323	119	17	112.08	18.78	0.1	+	NM_001400	DE	DownStream Enhancer	101474892	23146	S1PR1	1901	protein-coding
chr1	102480247	102480444	0#	1#[GTTCCTCA:104:0.9036193024858946]	0#	199	114	13	119.2	30.72	0.08	+	NR_039672	Body	Gene Body	102103142	377219	MIR548AI	100616347	miscRNA
chr1	105276815	105277443	1#[CACTTCCTCCTTT:470:0.919110366169785]	0#	1#[TGACCC:376:0.8857896050338628]	630	477	45	213.31	23.26	0.04	+	NR_031679	Body	Gene Body	105130113	147179	MIR548H3	100302287	miscRNA
chr1	108387830	108388415	1#[AAAAGAGGAAGTG:208:0.9999999999999994]	1#[GTTCCCCT:131:0.8775610514984932]	1#[TGACCC:482:0.8857896050338628]	587	236	178	2134.65	162.45	0	+	NR_046653	DE	DownStream Enhancer	108308587	79479	VAV3-AS1	100873946	miscRNA
chr1	108206269	108206592	0#	2#[CTTCCTCT:162:1.0000000000000002] [AGAGGAAG:66:1.0]	0#	325	185	25	120.96	16.1	0.07	-	NM_006113	Body	Gene Body	108309068	-102614	VAV3	10451	protein-coding
chr1	108221910	108222304	1#[AATAGAGGAAGTG:181:0.8281566828903975]	1#[CTTCCTCA:13:0.9757128198920624]	0#	396	187	99	1037.04	90.94	0	-	NM_006113	Body	Gene Body	108309068	-86971	VAV3	10451	protein-coding
chr1	108241513	108241956	1#[AAAGGAGGAAGTG:136:0.9191103661697848]	2#[GTTCCTCA:320:0.9036193024858946] [CTTCCTGA:358:0.8653647538446115]	0#	445	160	87	470.76	18.54	0	-	NM_006113	Body	Gene Body	108309068	-67395	VAV3	10451	protein-coding
chr1	108279522	108280145	1#[CAAAGGGGAAGTG:326:0.9177873454902451]	0#	1#[TGACCT:255:1.0]	625	340	112	1028.48	96.9	0	-	NM_006113	Body	Gene Body	108309068	-29206	VAV3	10451	protein-coding
chr1	108297133	108297509	0#	3#[CTTCCTGT:184:0.8896519339525494] [CTTCCTGT:271:0.8896519339525494] [TTTCCTCA:79:0.8667187803472263]	1#[TGACCT:197:1.0]	378	185	28	183.67	27.84	0.04	-	NM_006113	Body	Gene Body	108309068	-11750	VAV3	10451	protein-coding
chr1	108355427	108355732	0#	2#[CTTCCTCT:173:1.0000000000000002] [TTTCCTCA:70:0.8667187803472263]	1#[CGGTCA:251:0.8490319803691448]	307	165	49	516.9	66.04	0	-	NM_006113	UE	Upstream Enhancer	108309068	46524	VAV3	10451	protein-coding
chr1	108458313	108458848	0#	3#[TGAGGAAG:281:0.9757128198920622] [CTTCCCCT:185:0.9496545689046608] [GGAGGAAG:34:0.9250330832242935]	2#[TGACCC:262:0.8857896050338628] [TGGTCA:426:0.8180826906887997]	537	275	65	571.66	54.64	0	-	NM_213651	DE	DownStream Enhancer	108536954	-78366	SLC25A24	29957	protein-coding
chr1	108527144	108527511	0#	1#[AGAGGAAG:151:1.0]	0#	369	131	24	202.82	40.96	0.03	-	NM_213651	Body	Gene Body	108536954	-9679	SLC25A24	29957	protein-coding
chr1	108534231	108534666	0#	1#[TGGGGAAG:141:0.925367388796723]	1#[TGACCA:281:0.8180826906887997]	437	127	32	290.78	35.57	0.04	-	NM_213651	Body	Gene Body	108536954	-2596	SLC25A24	29957	protein-coding
chr1	108543845	108544089	1#[CAGTTCCTCCTTC:140:0.8175607167778701]	0#	1#[TGACCC:62:0.8857896050338628]	246	143	23	117.18	15.5	0.08	-	NM_013386	PP	Proximal Promoter	108544503	-515	SLC25A24	29957	protein-coding
chr1	108903938	108904272	0#	2#[AGAGGAAG:63:1.0] [CTTCCGCC:205:0.8620675461948546]	0#	336	83	30	258.89	38.76	0.04	+	NM_001010883	PP	Proximal Promoter	108904493	-472	FAM102B	284611	protein-coding
chr1	108914310	108914699	0#	4#[AGAGGAAG:161:1.0] [AGAGGAAG:171:1.0] [AGGGGAAG:1:0.9496545689046608] [CTTCCACA:380:0.8565942509560106]	2#[TGACCT:304:1.0] [TGGTCA:179:0.8180826906887997]	391	173	65	640.55	71.22	0	+	NM_001010883	Body	Gene Body	108904493	9990	FAM102B	284611	protein-coding
chr1	109008520	109009082	0#	2#[CTTCCTGT:236:0.8896519339525494] [AGAGGAAT:42:0.840598909800833]	1#[TGACCG:534:0.8490319803691448]	564	201	30	196.95	19.06	0.04	-	NM_001102592	UE	Upstream Enhancer	109005267	3454	HENMT1	113802	protein-coding
chr1	109044100	109044508	1#[CATTTCCTCTTTC:186:0.8610192750300423]	0#	0#	410	185	23	110.05	17.88	0.1	+	NM_018061	Body	Gene Body	109036454	7831	PRPF38B	55119	protein-coding
chr1	109065042	109065323	0#	1#[CTTCCTGT:80:0.8896519339525494]	1#[TGACCA:181:0.8180826906887997]	283	148	37	334.27	39.24	0.02	+	NM_001144937	Body	Gene Body	109057078	8112	FNDC7	163479	protein-coding
chr1	109192997	109193303	0#	1#[TGAGGAAG:147:0.9757128198920622]	0#	308	151	19	120.67	21.71	0.07	-	NM_152763	Body	Gene Body	109201249	-8101	AKNAD1	254268	protein-coding
chr1	109419928	109420425	0#	2#[CTTCCTCA:149:0.9757128198920624] [CTTCCGCC:222:0.8620675461948546]	1#[CGGTCA:127:0.8490319803691448]	499	160	32	111.28	8.7	0.1	-	NM_005645	PP	Proximal Promoter	109420147	-59	TAF13	6884	protein-coding
chr1	109433435	109433892	0#	1#[CTTCCGCC:216:0.8620675461948546]	0#	459	213	46	296.68	28.82	0.04	+	NM_020141	PP	Proximal Promoter	109434925	-1277	TMEM167B	56900	protein-coding
chr1	109443981	109444615	0#	4#[CTTCCTCA:251:0.9757128198920624] [CTTCCGCT:349:0.9370344629705614] [TGAGGAAC:238:0.9036193024858946] [GTTCCCCT:197:0.8775610514984932]	1#[TGACCC:555:0.8857896050338628]	636	354	66	335.09	18.49	0.02	+	NR_003023	PP	Proximal Promoter	109444337	-2	SCARNA2	677766	miscRNA
chr1	109450078	109450445	1#[AGAAGAGGAAGTG:179:0.8495334147564026]	1#[AGAAGAAG:103:0.839218783233912]	0#	369	173	41	397.89	55.08	0.03	-	NM_001122961	Body	Gene Body	109458002	-7751	C1orf194	127003	protein-coding
chr1	109456838	109457221	0#	4#[GGAGGAAG:181:0.9250330832242935] [TGAGGAAA:309:0.8667187803472263] [GTTCCGCT:211:0.8649409455643936] [AGAGGAAT:124:0.840598909800833]	2#[TGACCC:331:0.8857896050338628] [TGACCA:161:0.8180826906887997]	385	175	23	122.8	20.67	0.07	-	NM_001122961	PP	Proximal Promoter	109458002	-989	C1orf194	127003	protein-coding
chr1	109477906	109478574	0#	4#[CTTCCTCC:530:0.9250330832242935] [AGGGGAAC:249:0.8775610514984932] [CTTCCTGA:105:0.8653647538446115] [GGCGGAAG:279:0.8620675461948546]	3#[TGACCT:634:1.0] [TGGTCA:267:0.8180826906887997] [TGGTCA:476:0.8180826906887997]	670	333	92	850.44	68.56	0	+	NM_020775	Body	Gene Body	109458107	20132	KIAA1324	57535	protein-coding
chr1	109506483	109506748	0#	1#[TTTCCCCT:256:0.8406605293598248]	0#	267	95	28	144.47	15.26	0.04	+	NM_020775	Body	Gene Body	109458107	48471	KIAA1324	57535	protein-coding
chr1	109608046	109608370	1#[GAAAGGGGAACTG:102:0.8582216978156799]	1#[TTTCCTCT:53:0.8910059604551641]	2#[AGGTCA:9:1.0] [TGACCC:147:0.8857896050338628]	326	123	32	168.1	15.92	0.03	+	NM_001408	Body	Gene Body	109594163	14006	CELSR2	1952	protein-coding
chr1	109618876	109619588	0#	3#[CTTCCCCT:577:0.9496545689046608] [GTTCCTCT:406:0.9279064825938323] [GGAGGAAG:196:0.9250330832242935]	1#[TGACCC:102:0.8857896050338628]	714	221	33	159.33	13.08	0.03	+	NM_001408	Body	Gene Body	109594163	24934	CELSR2	1952	protein-coding
chr1	109651767	109652073	1#[CACTTCCCCCTTT:155:0.8788817133773802]	1#[TTTCCTCA:17:0.8667187803472263]	1#[AGGTCA:143:1.0]	308	151	39	205.42	16.52	0.03	-	NM_001010985	PP	Proximal Promoter	109651186	732	MYBPHL	343263	protein-coding
chr1	109740365	109740681	0#	0#	2#[AGGTCA:25:1.0] [TGACCA:72:0.8180826906887997]	318	102	37	211.63	17.75	0.04	-	NM_002959	Body	Gene Body	109742086	-1619	SORT1	6272	protein-coding
chr1	109845996	109846803	0#	4#[CTTCCTCT:239:1.0000000000000002] [AGAGGAAG:260:1.0] [CTTCCCCA:364:0.925367388796723] [GGGGGAAG:443:0.8746876521289542]	0#	809	265	52	157.39	9.58	0.03	+	NM_001134404	DE	DownStream Enhancer	109838223	8038	CYB561D1	284613	protein-coding
chr1	109892399	109892984	0#	1#[CTTCCGCT:239:0.9370344629705614]	0#	587	239	93	632.88	40.95	0	+	NM_006496	PP	Proximal Promoter	109892708	-70	GNAI3	2773	protein-coding
chr1	109899852	109900172	0#	1#[GTTCCTCC:95:0.8529395658181256]	0#	322	122	16	116.94	23.26	0.08	+	NM_006496	Body	Gene Body	109892708	7266	GNAI3	2773	protein-coding
chr1	109959957	109960453	0#	2#[GTTCCCCT:222:0.8775610514984932] [CTTCCACA:37:0.8565942509560106]	1#[TGACCT:322:1.0]	498	265	89	635.12	31.13	0	-	NM_005272	UE	Upstream Enhancer	109957228	2994	GNAT2	2780	protein-coding
chr1	109963449	109964035	0#	2#[TGAGGAAG:379:0.9757128198920622] [TCAGGAAG:60:0.8653647538446115]	0#	588	387	42	176.3	18.27	0.04	+	NM_139156	PP	Proximal Promoter	109963957	-121	AMPD2	271	protein-coding
chr1	109968555	109969187	0#	2#[CTTCCTCT:280:1.0000000000000002] [CTTCCCCA:93:0.925367388796723]	1#[AGGTCA:313:1.0]	634	293	131	1115.35	75.13	0	+	NM_001257361	PP	Proximal Promoter	109968132	716	AMPD2	271	protein-coding
chr1	110103924	110104296	0#	2#[AGAGGAAG:139:1.0] [GGAGGAAG:303:0.9250330832242935]	0#	374	156	40	148.77	13.05	0.03	-	NM_024526	Body	Gene Body	110108167	-4087	EPS8L3	79574	protein-coding
chr1	110107189	110107930	2#[AGAAGAGGAAGTG:289:0.8495334147564026] [CACTTCCTGCTTC:260:0.8277681180324756]	3#[GTTCCCCT:223:0.8775610514984932] [TGTGGAAG:101:0.8565942509560106] [TGTGGAAG:140:0.8565942509560106]	2#[AGGTCA:377:1.0] [TGGTCA:313:0.8180826906887997]	743	300	128	766.97	37.21	0	-	NM_024526	PP	Proximal Promoter	110108167	-678	EPS8L3	79574	protein-coding
chr1	110133323	110133769	0#	2#[CTTCCTCT:236:1.0000000000000002] [TTTCCTCT:158:0.8910059604551641]	0#	448	233	40	210.06	18.23	0.04	-	NM_024526	UE	Upstream Enhancer	110108167	25389	EPS8L3	79574	protein-coding
chr1	110134770	110135201	0#	0#	1#[TGACCA:188:0.8180826906887997]	433	182	35	190.86	12.81	0.04	-	NM_024526	UE	Upstream Enhancer	110108167	26785	EPS8L3	79574	protein-coding
chr1	110230892	110231469	0#	3#[AGAGGAAG:85:1.0] [GTTCCTCT:335:0.9279064825938323] [CTTCCACT:60:0.8808814310639483]	3#[TGACCA:33:0.8180826906887997] [TGACCA:246:0.8180826906887997] [TGGTCA:478:0.8180826906887997]	579	339	62	327.36	21.69	0.02	+	NM_172211	UE	Upstream Enhancer	110254755	-23524	CSF1	1435	protein-coding
chr1	110239937	110240319	0#	2#[ACAGGAAG:221:0.8896519339525494] [GTTCCTCC:136:0.8529395658181256]	4#[GGGTCA:36:0.8857896050338628] [TGACCC:105:0.8857896050338628] [GGGTCA:191:0.8857896050338628] [GGGTCA:231:0.8857896050338628]	384	165	30	127.69	10.9	0.06	+	NM_172211	UE	Upstream Enhancer	110254755	-14653	CSF1	1435	protein-coding
chr1	110250125	110250759	1#[CACTTCCTGTTTC:354:0.9086577518626905]	0#	0#	636	361	91	674.42	47.48	0	+	NM_172211	UE	Upstream Enhancer	110254755	-4269	CSF1	1435	protein-coding
chr1	110267619	110268084	0#	2#[CTTCCTCT:173:1.0000000000000002] [AGAAGAAG:62:0.839218783233912]	0#	467	166	56	415.43	40.7	0.03	+	NM_172211	Body	Gene Body	110254755	13030	CSF1	1435	protein-coding
chr1	110291820	110292132	0#	2#[CTTCCTCC:162:0.9250330832242935] [CTTCCTCC:223:0.9250330832242935]	0#	314	163	20	134.35	26.58	0.05	+	NM_006621	UE	Upstream Enhancer	110328909	-36926	AHCYL1	10768	protein-coding
chr1	110313768	110314019	1#[CACTTCCCCTTCT:96:0.8093047619639978]	0#	0#	253	94	29	254.24	36.77	0.03	+	NM_006621	UE	Upstream Enhancer	110328909	-15047	AHCYL1	10768	protein-coding
chr1	110328220	110329065	0#	4#[AGAGGAAC:566:0.9279064825938323] [GGAGGAAG:186:0.9250330832242935] [CTTCCCCC:634:0.874687652128954] [GTTCCGCA:460:0.8406537654564559]	0#	847	598	90	200.52	9.19	0.04	+	NM_006621	PP	Proximal Promoter	110328909	-91	AHCYL1	10768	protein-coding
chr1	110335656	110335958	0#	1#[TGAGGAAC:71:0.9036193024858946]	0#	304	85	23	206.68	42.06	0.03	+	NM_006621	Body	Gene Body	110328909	6832	AHCYL1	10768	protein-coding
chr1	110528736	110529021	0#	2#[TGAGGAAG:70:0.9757128198920622] [AGAGGAAC:158:0.9279064825938323]	1#[TGACCA:128:0.8180826906887997]	287	151	18	121.89	20.02	0.07	+	NM_001010898	Body	Gene Body	110494654	34233	SLC6A17	388662	protein-coding
chr1	110554070	110554391	0#	2#[GGAGGAAG:259:0.9250330832242935] [GGCGGAAG:178:0.8620675461948546]	1#[AGGTCA:74:1.0]	323	239	21	117.97	18.78	0.08	+	NM_004978	PP	Proximal Promoter	110554858	-549	KCNC4	3749	protein-coding
chr1	110603886	110604251	0#	2#[CTTCCTCT:215:1.0000000000000002] [CTTCCTGA:22:0.8653647538446115]	0#	367	211	37	218.61	25.04	0.04	+	NM_004978	DE	DownStream Enhancer	110554858	49239	KCNC4	3749	protein-coding
chr1	110724777	110725126	0#	2#[TTTCCTCT:225:0.8910059604551641] [GGGGGAAG:9:0.8746876521289542]	0#	351	232	18	121.89	20.41	0.07	-	NM_001201549	Body	Gene Body	110735227	-10218	SLC16A4	9122	protein-coding
chr1	110728706	110728969	0#	1#[AGGGGAAC:31:0.8775610514984932]	0#	265	117	46	419.05	45.35	0.03	-	NM_001201549	Body	Gene Body	110735227	-6404	SLC16A4	9122	protein-coding
chr1	110729310	110729566	0#	1#[CTTCCGCT:119:0.9370344629705614]	1#[TGACCT:79:1.0]	258	123	26	204.03	29.07	0.03	-	NM_001201549	Body	Gene Body	110735227	-5794	SLC16A4	9122	protein-coding
chr1	110771103	110771334	0#	2#[AGAGGAAG:114:1.0] [CTTCCTGA:173:0.8653647538446115]	0#	233	111	21	184.3	32.95	0.04	-	NM_006402	UE	Upstream Enhancer	110752069	19145	HBXIP	10542	protein-coding
chr1	110774443	110774944	0#	4#[CTTCCCCA:156:0.925367388796723] [CTTCCTCC:271:0.9250330832242935] [TGAGGAAC:419:0.9036193024858946] [CTTCCCCC:19:0.874687652128954]	1#[TGACCA:394:0.8180826906887997]	503	271	68	412.34	34.36	0.03	+	NM_032414	UE	Upstream Enhancer	110795310	-20596	PROK1	84432	protein-coding
chr1	110846391	110847180	1#[CAGTTCCTCTTTT:352:0.9146683389841244]	1#[GGAGGAAG:169:0.9250330832242935]	1#[TGGTCA:444:0.8180826906887997]	791	358	165	1664.04	111.11	0	+	NR_003599	DE	DownStream Enhancer	110824910	21839	CYMP	643160	pseudo
chr1	110886972	110887150	1#[CACTTCCTGATTA:45:0.8187973599993492]	0#	0#	180	82	17	150.6	28.62	0.04	-	NM_005549	UE	Upstream Enhancer	110863320	23734	KCNA10	3744	protein-coding
chr1	110988079	110988312	0#	3#[CTTCCTCT:157:1.0000000000000002] [CTTCCCCA:196:0.925367388796723] [TTTCCTCT:166:0.8910059604551641]	0#	235	150	16	145.06	30.72	0.04	-	NM_004974	UE	Upstream Enhancer	110950498	37731	KCNA2	3737	protein-coding
chr1	111224054	111224672	0#	5#[AGAGGAAG:479:1.0] [AGGGGAAG:348:0.9496545689046608] [GTTCCTCT:287:0.9279064825938323] [CTTCCTGT:502:0.8896519339525494] [TGTGGAAG:155:0.8565942509560106]	2#[AGGTCA:47:1.0] [TGGTCA:185:0.8180826906887997]	620	371	75	360.18	24.63	0.03	+	NM_001040033	Body	Gene Body	111215343	9082	CD53	963	protein-coding
chr1	111216969	111217515	1#[CACTTCCTCCTTC:245:0.9028923777937458]	3#[AGAGGAAG:176:1.0] [TGAGGAAC:403:0.9036193024858946] [CTTCCTGT:270:0.8896519339525494]	0#	548	268	148	1600.82	94.19	0	+	NM_000560	PP	Proximal Promoter	111217244	-7	CD53	963	protein-coding
chr1	111565750	111566250	1#[GAAACTGGAAGTG:439:0.8139370759116384]	0#	1#[AGGTCA:380:1.0]	502	261	57	342.02	27.52	0.02	+	NM_004000	UE	Upstream Enhancer	111571803	-5792	CHI3L2	1117	protein-coding
chr1	111815181	111815819	1#[TACTTCCTCTTTC:262:0.8451196230911928]	2#[CTTCCTCT:373:1.0000000000000002] [CTTCCCCT:477:0.9496545689046608]	1#[GGGTCA:429:0.8857896050338628]	640	231	50	308.16	31.01	0.02	+	NM_174896	UE	Upstream Enhancer	111818126	-2714	C1orf162	128346	protein-coding
chr1	111824836	111825303	0#	2#[AGAGGAAG:201:1.0] [CTTCCCCT:138:0.9496545689046608]	2#[GGGTCA:289:0.8857896050338628] [TGGTCA:9:0.8180826906887997]	469	256	35	240.3	27.18	0.03	+	NM_174896	DE	DownStream Enhancer	111818126	6966	C1orf162	128346	protein-coding
chr1	111833731	111834150	0#	2#[AGAGGAAG:179:1.0] [TGAGGAAG:276:0.9757128198920622]	2#[TGACCA:305:0.8180826906887997] [TGACCA:327:0.8180826906887997]	421	303	60	568.44	41.31	0	-	NM_020683	Body	Gene Body	111848266	-14232	ADORA3	140	protein-coding
chr1	111847306	111848155	0#	5#[AGAGGAAG:608:1.0] [AGAGGAAC:837:0.9279064825938323] [AGGGGAAC:205:0.8775610514984932] [TCAGGAAG:588:0.8653647538446115] [GTTCCCCA:498:0.8532738713905553]	3#[GGGTCA:398:0.8857896050338628] [TGACCA:82:0.8180826906887997] [TGACCA:94:0.8180826906887997]	851	602	72	285.58	21.89	0.04	-	NM_020683	PP	Proximal Promoter	111848266	-358	ADORA3	140	protein-coding
chr1	111849625	111850368	0#	3#[CTTCCTCT:507:1.0000000000000002] [AGAGGAAC:288:0.9279064825938323] [CTTCCCCG:678:0.8336868838942818]	4#[AGGTCA:159:1.0] [TGACCC:320:0.8857896050338628] [TGACCG:99:0.8490319803691448] [TGGTCA:220:0.8180826906887997]	745	503	62	240.61	24.66	0.03	-	NM_020683	PP	Proximal Promoter	111848266	1862	ADORA3	140	protein-coding
chr1	111825878	111826225	0#	0#	0#	349	124	31	171.74	19.68	0.03	-	NM_001081976	DE	DownStream Enhancer	111908120	-82118	ADORA3	140	protein-coding
chr1	111851429	111852764	0#	7#[CTTCCTCT:461:1.0000000000000002] [TGAGGAAG:998:0.9757128198920622] [CTTCCCCA:483:0.925367388796723] [ACAGGAAG:71:0.8896519339525494] [GTTCCGCT:189:0.8649409455643936] [AGGGGAAA:88:0.8406605293598248] [ACGGGAAG:1164:0.83930650285721]	3#[AGGTCA:822:1.0] [GGGTCA:561:0.8857896050338628] [GGGTCA:638:0.8857896050338628]	1337	458	244	1454.24	50.39	0	-	NM_001081976	Body	Gene Body	111908120	-56233	ADORA3	140	protein-coding
chr1	111914925	111915240	0#	0#	0#	317	106	27	143	18.43	0.04	-	NM_001081976	UE	Upstream Enhancer	111908120	6911	ADORA3	140	protein-coding
chr1	111960024	111960850	1#[AAAAGAGGAAGTC:198:0.8913317838010807]	6#[CTTCCTCT:661:1.0000000000000002] [TGAGGAAG:128:0.9757128198920622] [CTTCCCCA:609:0.925367388796723] [GTTCCTCA:457:0.9036193024858946] [CTTCCTGT:580:0.8896519339525494] [NNAGGAAG:209:0.8600540086556869]	0#	828	208	126	1070.7	74.62	0	+	NM_002884	UE	Upstream Enhancer	111963927	-3695	RAP1A	5906	protein-coding
chr1	111997808	111998232	1#[GATAGAGGAAGTG:228:0.8119386945143581]	1#[AGTGGAAG:311:0.8808814310639483]	1#[AGGTCA:128:1.0]	426	234	35	318.89	53.49	0.02	+	NM_002884	Body	Gene Body	111963927	34115	RAP1A	5906	protein-coding
chr1	112011168	112011405	0#	1#[AGAGGAAC:48:0.9279064825938323]	1#[AGGTCA:188:1.0]	239	102	17	112.08	15.28	0.1	+	NM_002884	Body	Gene Body	111963927	47343	RAP1A	5906	protein-coding
chr1	112043441	112043772	1#[CACTTCCTCTTTT:159:1.0]	0#	1#[GGGTCA:260:0.8857896050338628]	333	248	16	114.68	18.6	0.1	+	NM_002884	Body	Gene Body	111963927	79762	RAP1A	5906	protein-coding
chr1	112077423	112078548	1#[AAAGGAGGAAGTG:886:0.9191103661697848]	7#[AGGGGAAG:335:0.9496545689046608] [AGAGGAAC:310:0.9279064825938323] [TGGGGAAG:708:0.925367388796723] [GGAGGAAG:238:0.9250330832242935] [ACAGGAAG:831:0.8896519339525494] [CTTCCTCG:1081:0.8840323149896212] [CTTCCCCC:657:0.874687652128954]	3#[TGACCT:155:1.0] [GGGTCA:408:0.8857896050338628] [TGACCA:1044:0.8180826906887997]	1127	321	216	1291.32	44.4	0	-	NM_019099	Body	Gene Body	112083569	-5825	FAM212B	55924	protein-coding
chr1	112099392	112099923	0#	4#[TGGGGAAG:235:0.925367388796723] [TTTCCTCT:467:0.8910059604551641] [TTTCCTCA:490:0.8667187803472263] [AGCGGAAC:268:0.8649409455643936]	0#	533	297	34	124.29	12.4	0.07	+	NM_007204	PP	Proximal Promoter	112099712	-23	DDX20	11218	protein-coding
chr1	112311874	112312198	1#[GAGAGAGGAAGTG:107:0.8159749523179656]	0#	2#[AGGTCA:129:1.0] [TGACCT:317:1.0]	326	120	16	118.86	29.07	0.08	-	NM_172198	Body	Gene Body	112333300	-21306	KCND3	3752	protein-coding
chr1	112342534	112342857	1#[CAGTTCCTCTTTT:136:0.9146683389841244]	0#	1#[TGGTCA:197:0.8180826906887997]	325	141	32	328.59	61.85	0.02	-	NM_172198	UE	Upstream Enhancer	112333300	9375	KCND3	3752	protein-coding
chr1	112346695	112347025	1#[CACTTCCTCTTTG:186:0.9580159982826505]	2#[CTTCCCCC:159:0.874687652128954] [CTTCCACA:267:0.8565942509560106]	0#	332	167	45	383.4	45.22	0.03	-	NM_172198	UE	Upstream Enhancer	112333300	13562	KCND3	3752	protein-coding
chr1	112738201	112738902	1#[CACTTCCTCATTG:280:0.8992440432374733]	0#	1#[TGACCC:594:0.8857896050338628]	703	288	125	988.31	72.45	0	+	NM_018704	PP	Proximal Promoter	112740322	-1833	CTTNBP2NL	55917	protein-coding
chr1	112775272	112775524	0#	1#[CTTCCTCT:124:1.0000000000000002]	0#	254	136	18	163.8	35.84	0.03	+	NM_018704	Body	Gene Body	112740322	35086	CTTNBP2NL	55917	protein-coding
chr1	112963621	112964712	0#	2#[CTTCCTCA:876:0.9757128198920624] [TTTCCTCT:567:0.8910059604551641]	1#[TGGTCA:839:0.8180826906887997]	1093	869	59	189.77	14.4	0.04	+	NM_006135	PP	Proximal Promoter	112963597	893	CAPZA1	829	protein-coding
chr1	113044612	113045223	0#	4#[AGAGGAAC:385:0.9279064825938323] [ACAGGAAG:131:0.8896519339525494] [GGGGGAAG:220:0.8746876521289542] [CTTCCTGA:305:0.8653647538446115]	4#[TGACCT:519:1.0] [TGACCC:90:0.8857896050338628] [TGACCC:323:0.8857896050338628] [GGGTCA:362:0.8857896050338628]	613	394	57	208.28	16.06	0.04	+	NM_001130079	DE	DownStream Enhancer	113018570	26436	MOV10	4343	protein-coding
chr1	113048732	113049558	1#[CACTTCCTCCTTC:481:0.9028923777937458]	4#[CTTCCTCC:171:0.9250330832242935] [CTTCCTCC:182:0.9250330832242935] [CTTCCTCC:329:0.9250330832242935] [AGGGGAAC:501:0.8775610514984932]	3#[TGACCT:509:1.0] [GGGTCA:209:0.8857896050338628] [TGACCA:237:0.8180826906887997]	828	495	114	632.48	38.51	0	-	NM_001042679	Body	Gene Body	113051201	-1974	RHOC	389	protein-coding
chr1	113057791	113058502	1#[GAAAGAGGAACTG:483:0.8984503506080849]	3#[CTTCCTCA:609:0.9757128198920624] [TGAGGAAG:457:0.9757128198920622] [CTTCCCCC:224:0.874687652128954]	1#[AGGTCA:72:1.0]	713	511	71	567.34	54.16	0	-	NM_005167	Body	Gene Body	113059473	-1171	PPM1J	333926	protein-coding
chr1	113226585	113227231	0#	4#[AGAGGAAG:228:1.0] [CTTCCCCT:436:0.9496545689046608] [CTTCCCCC:451:0.874687652128954] [CGGGGAAG:359:0.8336868838942818]	2#[CGGTCA:66:0.8490319803691448] [TGACCA:631:0.8180826906887997]	648	241	59	329.22	29.2	0.02	+	NR_002796	UE	Upstream Enhancer	113267494	-40668	AKR7A2P1	246182	pseudo
chr1	113327665	113328310	1#[CACTTCCCTTTTT:432:0.886468041654403]	4#[CTTCCCCT:286:0.9496545689046608] [TGAGGAAA:65:0.8667187803472263] [GTTCCCCA:401:0.8532738713905553] [CTTCTTCT:186:0.8392187832339122]	0#	647	438	99	832.55	72.09	0	-	NM_001166496	UE	Upstream Enhancer	113300208	27895	SLC16A1	6566	protein-coding
chr1	113386837	113387318	0#	1#[AGAGGAAG:172:1.0]	1#[TGACCG:90:0.8490319803691448]	483	193	72	490.1	32.9	0	+	NM_014813	UE	Upstream Enhancer	113417353	-30323	LRIG2	9860	protein-coding
chr1	113416948	113417581	0#	1#[AGCGGAAG:206:0.9370344629705611]	1#[TGACCC:34:0.8857896050338628]	635	332	62	283.68	16.42	0.04	+	NM_014813	PP	Proximal Promoter	113417353	-73	LRIG2	9860	protein-coding
chr1	113514712	113515280	1#[GAAAAGGGAAGTG:120:0.8702500532783634]	0#	1#[TGACCC:223:0.8857896050338628]	570	135	53	268.41	25.68	0.04	-	NR_038846	DE	DownStream Enhancer	113550398	-35551	LOC643441	643441	miscRNA
chr1	113536340	113536780	0#	4#[GTTCCTCT:64:0.9279064825938323] [AGAGGAAC:251:0.9279064825938323] [GTTCCCCT:329:0.8775610514984932] [TCAGGAAG:241:0.8653647538446115]	1#[TGACCA:157:0.8180826906887997]	442	236	35	174.67	19.68	0.04	-	NR_038846	DE	DownStream Enhancer	113550398	-13822	LOC643441	643441	miscRNA
chr1	114045476	114045985	1#[AAAACAGGAAGTC:229:0.8162075240398106]	1#[CTTCCCCC:268:0.874687652128954]	0#	511	248	75	521.36	46.69	0	-	NM_006608	Body	Gene Body	114103300	-57576	PHTF1	10745	protein-coding
chr1	114103547	114104311	0#	6#[CTTCCTCT:568:1.0000000000000002] [CTTCCTCA:302:0.9757128198920624] [CTTCCGCT:134:0.9370344629705614] [AGAGGAAC:635:0.9279064825938323] [GGAGGAAG:535:0.9250330832242935] [GTTCCCCA:412:0.8532738713905553]	2#[AGGTCA:439:1.0] [AGGTCA:722:1.0]	766	544	117	853.01	27.61	0	-	NM_006608	PP	Proximal Promoter	114103300	791	PHTF1	10745	protein-coding
chr1	114127535	114128166	1#[CACTTCCTTTTTC:312:0.9104787060707685]	0#	1#[TGACCA:18:0.8180826906887997]	633	307	160	1713.71	110.41	0	-	NM_018364	Body	Gene Body	114156593	-28751	RSBN1	54665	protein-coding
chr1	114156487	114157039	0#	2#[CTTCCTCA:362:0.9757128198920624] [CTTCCTGT:350:0.8896519339525494]	1#[TGACCC:357:0.8857896050338628]	554	345	33	121.41	10.8	0.07	-	NM_018364	PP	Proximal Promoter	114156593	239	RSBN1	54665	protein-coding
chr1	114203717	114203878	0#	1#[TGGGGAAG:69:0.925367388796723]	0#	163	81	31	381.22	58.76	0.03	+	NR_037864	Body	Gene Body	114200779	3019	AP4B1-AS1	100287722	miscRNA
chr1	114223298	114223480	0#	1#[AGGGGAAG:90:0.9496545689046608]	0#	184	105	15	137.29	25.67	0.04	+	NR_037864	Body	Gene Body	114200779	22624	AP4B1-AS1	100287722	miscRNA
chr1	114216381	114216753	0#	1#[TGGGGAAG:99:0.925367388796723]	2#[TGACCT:110:1.0] [TGACCA:254:0.8180826906887997]	374	117	36	261.11	33.59	0.04	-	NM_001193431	PP	Proximal Promoter	114215898	600	PTPN22	26191	protein-coding
chr1	114248905	114249820	1#[GACTTCCTTTTTC:651:0.8018104898718494]	4#[TGCGGAAG:353:0.9127472828626235] [CTTCCCCC:456:0.874687652128954] [TGTGGAAG:758:0.8565942509560106] [CTTCTTCT:904:0.8392187832339122]	1#[TGACCG:268:0.8490319803691448]	917	650	112	705.1	44.43	0	+	NM_022836	PP	Proximal Promoter	114249437	118	DCLRE1B	64858	protein-coding
chr1	114273274	114273788	0#	1#[CTTCCGCC:393:0.8620675461948546]	0#	516	394	38	170.67	17.14	0.03	+	NM_152696	PP	Proximal Promoter	114273518	150	HIPK1	204851	protein-coding
chr1	114284534	114285229	0#	1#[TGAGGAAG:375:0.9757128198920622]	2#[TGACCA:479:0.8180826906887997] [TGACCA:551:0.8180826906887997]	697	384	63	266.36	20.26	0.04	+	NM_152696	Body	Gene Body	114273518	11400	HIPK1	204851	protein-coding
chr1	114347578	114347909	0#	3#[CTTCCCCT:146:0.9496545689046608] [GTTCCCCT:134:0.8775610514984932] [CTTCCCCC:261:0.874687652128954]	0#	333	249	27	162.49	13.95	0.03	+	NM_020190	DE	DownStream Enhancer	114323552	24275	OLFML3	56944	protein-coding
chr1	114458000	114458433	0#	3#[CTTCCTCT:172:1.0000000000000002] [CTTCCTCA:123:0.9757128198920624] [CTTCCTCC:237:0.9250330832242935]	1#[TGACCG:183:0.8490319803691448]	435	165	49	177.54	11.04	0.04	-	NM_205848	Body	Gene Body	114496585	-38420	SYT6	148281	protein-coding
chr1	114474230	114474764	1#[GACTTCCTCTTTT:324:0.891331783801081]	2#[CTTCCACT:184:0.8808814310639483] [GTTCCCCA:412:0.8532738713905553]	2#[AGGTCA:282:1.0] [TGACCC:379:0.8857896050338628]	536	360	36	176.82	15.58	0.04	-	NM_205848	Body	Gene Body	114496585	-21995	SYT6	148281	protein-coding
chr1	114475116	114475749	1#[GACTTCCTCTTTT:377:0.891331783801081]	3#[AGAGGAAC:353:0.9279064825938323] [CTTCCCCA:331:0.925367388796723] [CTTCCCCC:113:0.874687652128954]	0#	635	371	98	954.59	116.28	0	-	NM_205848	Body	Gene Body	114496585	-21098	SYT6	148281	protein-coding
chr1	114724251	114724613	0#	1#[CTTCCTCC:173:0.9250330832242935]	1#[TGACCG:296:0.8490319803691448]	364	172	25	216.18	51.2	0.04	-	NM_015906	DE	DownStream Enhancer	114855304	-130881	TRIM33	51592	protein-coding
chr1	114826737	114827103	1#[CACTTCCCCCTTC:173:0.8626637250013409]	2#[CTTCCTCC:193:0.9250330832242935] [TTTCCCCT:105:0.8406605293598248]	0#	368	193	37	354.16	62.05	0.03	-	NM_015906	Body	Gene Body	114855304	-28374	TRIM33	51592	protein-coding
chr1	114849332	114849744	0#	1#[TGAGGAAG:286:0.9757128198920622]	0#	414	303	73	881.49	137.21	0	-	NM_015906	Body	Gene Body	114855304	-5669	TRIM33	51592	protein-coding
chr1	114855306	114855697	0#	0#	0#	393	146	26	136.3	19.77	0.05	-	NM_015906	PP	Proximal Promoter	114855304	148	TRIM33	51592	protein-coding
chr1	115116251	115116450	1#[CACTTCCTCATTT:87:0.9412280449548228]	0#	0#	201	78	16	149.26	34.88	0.04	-	NM_025073	Body	Gene Body	115124831	-8502	SIKE1	80143	protein-coding
chr1	115626878	115627296	1#[CAAAGAGGAACTG:130:0.8726843372667745]	1#[CTTCCACT:359:0.8808814310639483]	1#[TGACCT:266:1.0]	420	159	26	188.02	30.6	0.04	-	NM_002506	DE	DownStream Enhancer	115682380	-55343	NGF	4803	protein-coding
chr1	115717430	115717821	1#[CACTTCCTCCTTC:259:0.9028923777937458]	0#	3#[TGACCT:229:1.0] [TGACCC:311:0.8857896050338628] [TGACCA:377:0.8180826906887997]	393	240	41	306.9	36.18	0.02	-	NM_002506	UE	Upstream Enhancer	115682380	35290	NGF	4803	protein-coding
chr1	115939920	115940312	0#	2#[CTTCCTCA:310:0.9757128198920624] [TGAGGAAG:185:0.9757128198920622]	1#[CGGTCA:335:0.8490319803691448]	394	290	36	137.76	10.31	0.04	+	NM_001172411	UE	Upstream Enhancer	115986096	-45886	VANGL1	81839	protein-coding
chr1	116107821	116108157	0#	1#[AGAGGAAG:201:1.0]	0#	338	218	21	152.57	29.48	0.03	-	NM_001232	Body	Gene Body	116112949	-4910	CASQ2	845	protein-coding
chr1	116209730	116210180	1#[AAAAAGGGAAGTG:280:0.8864680416544026]	1#[GGAGGAAG:8:0.9250330832242935]	1#[AGGTCA:302:1.0]	452	306	93	678.21	38.1	0	-	NM_001111061	UE	Upstream Enhancer	116184856	25180	NHLH2	4808	protein-coding
chr1	116217229	116217677	1#[AAAGAAGGAAGTG:268:0.8458070606165926]	3#[CTTCCTCT:51:1.0000000000000002] [GGAGGAAG:285:0.9250330832242935] [TTTCCCCT:132:0.8406605293598248]	0#	450	284	29	144.59	14.8	0.04	-	NM_001111061	UE	Upstream Enhancer	116184856	32657	NHLH2	4808	protein-coding
chr1	116224253	116224548	0#	1#[GTTCCTCT:86:0.9279064825938323]	0#	297	94	22	126.84	19.57	0.06	-	NM_001111061	UE	Upstream Enhancer	116184856	39491	NHLH2	4808	protein-coding
chr1	116309764	116310198	1#[TAAAGAGGAAGTC:219:0.8440253586068771]	2#[TGAGGAAA:78:0.8667187803472263] [GTTCCTCC:284:0.8529395658181256]	1#[TGACCA:249:0.8180826906887997]	436	256	27	218.93	43.09	0.04	+	NM_018420	UE	Upstream Enhancer	116320641	-10621	SLC22A15	55356	protein-coding
chr1	116319893	116320630	1#[CACTTCCTCTTTC:486:0.9837820116239607]	1#[ACAGGAAG:569:0.8896519339525494]	1#[GGGTCA:433:0.8857896050338628]	739	480	140	1416.61	110.28	0	+	NM_018420	PP	Proximal Promoter	116320641	-268	SLC22A15	55356	protein-coding
chr1	116431765	116432229	1#[GACTTCCTCTTTT:189:0.891331783801081]	0#	0#	466	195	27	212.52	40.96	0.04	+	NM_152367	UE	Upstream Enhancer	116455898	-23938	MAB21L3	126868	protein-coding
chr1	116477067	116477495	0#	4#[TGAGGAAA:288:0.8667187803472263] [CTTCCTGA:319:0.8653647538446115] [CTTCCTGA:409:0.8653647538446115] [CTTCCACA:200:0.8565942509560106]	0#	430	291	26	117.9	15.86	0.08	+	NM_152367	Body	Gene Body	116455898	21460	MAB21L3	126868	protein-coding
chr1	116483058	116483514	0#	2#[GGAGGAAC:173:0.8529395658181258] [TTTCCCCT:222:0.8406605293598248]	1#[TGACCT:447:1.0]	458	207	40	270.6	24.55	0.04	+	NM_152367	DE	DownStream Enhancer	116455898	27367	MAB21L3	126868	protein-coding
chr1	116711732	116712061	1#[CACTTCCTCCTTC:142:0.9028923777937458]	0#	0#	331	142	28	151.62	19.24	0.04	+	NM_000701	UE	Upstream Enhancer	116717317	-5443	ATP1A1	476	protein-coding
chr1	116717167	116717601	0#	0#	0#	436	208	26	134.52	22.81	0.05	+	NM_000701	PP	Proximal Promoter	116717317	58	ATP1A1	476	protein-coding
chr1	116717612	116717962	0#	5#[AGGGGAAG:101:0.9496545689046608] [TGGGGAAG:46:0.925367388796723] [GGAGGAAG:110:0.9250330832242935] [GGAGGAAG:154:0.9250330832242935] [GGGGGAAG:248:0.8746876521289542]	0#	352	135	32	283.21	42.64	0.04	+	NM_000701	PP	Proximal Promoter	116717317	430	ATP1A1	476	protein-coding
chr1	116721936	116722425	0#	1#[AGAGGAAG:228:1.0]	0#	491	245	45	309.6	41.34	0.02	+	NM_000701	Body	Gene Body	116717317	4864	ATP1A1	476	protein-coding
chr1	116838070	116839116	1#[AGAAGAGGAAGTG:289:0.8495334147564026]	1#[CTTCCCCT:332:0.9496545689046608]	2#[AGGTCA:491:1.0] [TGACCT:935:1.0]	1048	304	104	574.76	42.04	0	-	NM_001779	DE	DownStream Enhancer	116915238	-76864	CD58	965	protein-coding
chr1	116840417	116840855	0#	0#	0#	440	234	26	125.01	17.44	0.07	-	NM_001779	DE	DownStream Enhancer	116915238	-74587	CD58	965	protein-coding
chr1	116848389	116849095	0#	1#[GTTCCTCA:424:0.9036193024858946]	1#[TGACCA:413:0.8180826906887997]	708	447	69	312.2	22.64	0.02	-	NM_001779	DE	DownStream Enhancer	116915238	-66402	CD58	965	protein-coding
chr1	116884181	116884835	1#[GACTTCCTCTTTT:299:0.891331783801081]	0#	1#[TGACCA:335:0.8180826906887997]	656	261	32	145.38	13.98	0.04	-	NM_001779	Body	Gene Body	116915238	-30796	CD58	965	protein-coding
chr1	117011633	117012049	0#	1#[CTTCCTCT:209:1.0000000000000002]	1#[TGACCT:126:1.0]	418	227	27	166.16	28.69	0.03	-	NM_001542	PP	Proximal Promoter	117011837	23	IGSF3	3321	protein-coding
chr1	117024843	117025307	0#	2#[AGGGGAAG:267:0.9496545689046608] [AGAGGAAT:339:0.840598909800833]	1#[AGGTCA:442:1.0]	466	260	37	163.08	20.13	0.03	+	NR_031564	DE	DownStream Enhancer	117015893	9210	MIR320B1	100302117	miscRNA
chr1	117102315	117102598	0#	3#[CTTCCTCT:231:1.0000000000000002] [AGAGGAAG:106:1.0] [GGAGGAAG:123:0.9250330832242935]	0#	285	133	62	686.25	72.67	0	+	NM_001767	Body	Gene Body	117098608	3840	CD2	914	protein-coding
chr1	117347391	117348044	0#	5#[AGGGGAAG:155:0.9496545689046608] [AGGGGAAG:462:0.9496545689046608] [GGGGGAAG:430:0.8746876521289542] [TCAGGAAG:601:0.8653647538446115] [CTTCTTCT:526:0.8392187832339122]	1#[TGACCA:6:0.8180826906887997]	655	453	38	123.67	13.18	0.07	+	NM_001256109	Body	Gene Body	117345894	1950	CD101	9398	protein-coding
chr1	117351379	117351658	1#[CACTTCCTAGTTT:109:0.8026240159455804]	0#	0#	281	101	21	115.49	16.91	0.09	+	NM_001256109	Body	Gene Body	117345894	5586	CD101	9398	protein-coding
chr1	117353339	117353594	0#	0#	0#	257	139	38	300.97	34.86	0.03	+	NM_001256109	Body	Gene Body	117345894	7584	CD101	9398	protein-coding
chr1	117380068	117380331	0#	1#[CTTCCCCT:132:0.9496545689046608]	0#	265	137	21	147.5	18.9	0.04	+	NM_001256109	Body	Gene Body	117345894	34311	CD101	9398	protein-coding
chr1	117525690	117526147	0#	3#[AGAGGAAG:217:1.0] [GGAGGAAG:145:0.9250330832242935] [CTTCCTGA:36:0.8653647538446115]	5#[TGACCT:19:1.0] [AGGTCA:264:1.0] [TGGTCA:280:0.8180826906887997] [TGGTCA:296:0.8180826906887997] [TGGTCA:312:0.8180826906887997]	459	165	36	202.7	21.35	0.03	-	NM_001253849	Body	Gene Body	117547981	-22126	VTCN1	79679	protein-coding
chr1	117711440	117711766	0#	2#[GGAGGAAG:33:0.9250330832242935] [GGAGGAAG:132:0.9250330832242935]	0#	328	153	24	178.6	32.2	0.04	+	NM_006699	PP	Proximal Promoter	117711607	-14	MAN1A2	10905	protein-coding
chr1	117916436	117917223	1#[CACTTCCTGTTTT:461:0.9248757402387298]	2#[AGAGGAAA:582:0.8910059604551641] [CTTCCCCG:323:0.8336868838942818]	3#[AGGTCA:626:1.0] [TGACCA:343:0.8180826906887997] [TGGTCA:451:0.8180826906887997]	789	462	195	1818.26	102.75	0	+	NM_017709	UE	Upstream Enhancer	117950126	-33228	FAM46C	54855	protein-coding
chr1	118008578	118008790	0#	1#[AGAAGAAG:110:0.839218783233912]	0#	214	132	14	115.33	23.26	0.09	+	NM_017709	DE	DownStream Enhancer	117950126	58584	FAM46C	54855	protein-coding
chr1	118016202	118016603	0#	1#[GTTCCTCT:25:0.9279064825938323]	2#[GGGTCA:220:0.8857896050338628] [GGGTCA:280:0.8857896050338628]	403	263	34	185.16	23.43	0.04	+	NM_017709	DE	DownStream Enhancer	117950126	66339	FAM46C	54855	protein-coding
chr1	118391211	118391846	0#	1#[CTTCCTCA:122:0.9757128198920624]	0#	637	121	37	184.97	20.99	0.04	-	NM_206996	Body	Gene Body	118529371	-138039	SPAG17	200162	protein-coding
chr1	119207898	119208127	1#[AAATGAGGAAGTG:77:0.9412280449548224]	0#	0#	231	111	30	351.93	66.56	0.03	-	NM_152380	DE	DownStream Enhancer	119333702	-125693	TBX15	6913	protein-coding
chr1	119476196	119476636	0#	1#[CTTCCTCT:193:1.0000000000000002]	0#	442	200	25	126.2	20.56	0.07	-	NM_015836	Body	Gene Body	119484818	-8422	WARS2	10352	protein-coding
chr1	119667769	119668193	0#	2#[AGAGGAAG:171:1.0] [ACAGGAAG:37:0.8896519339525494]	0#	426	172	50	538.23	94.71	0	+	NM_016527	UE	Upstream Enhancer	119712924	-44983	HAO2	51179	protein-coding
chr1	119900592	119900908	1#[GAAAGAGGAAGTG:200:0.9837820116239603]	1#[CTTCCTCG:84:0.8840323149896212]	1#[TGACCT:136:1.0]	318	200	38	367.17	46.22	0.03	+	NR_033781	UE	Upstream Enhancer	119908025	-7233	HSD3BP4	128102	pseudo
chr1	119909405	119909573	0#	1#[GTTCCTCT:81:0.9279064825938323]	2#[TGACCT:22:1.0] [TGACCT:101:1.0]	170	85	23	254.86	45.47	0.03	+	NR_033781	Body	Gene Body	119908025	1465	HSD3BP4	128102	pseudo
chr1	119938064	119938309	2#[GAAAGAGGAAGTG:156:0.9837820116239603] [CAGTTCCCCTTTG:70:0.8324556844743699]	1#[CTTCCTCG:40:0.8840323149896212]	0#	247	125	17	153.68	33.28	0.03	-	NR_036540	DE	DownStream Enhancer	119943437	-5248	LINC00622	644242	miscRNA
chr1	120046636	120046842	1#[GACTTCCTCTTTG:126:0.8493477820837315]	0#	0#	208	123	22	224.53	46.51	0.03	+	NM_006623	UE	Upstream Enhancer	120055941	-9182	PHGDH	26227	protein-coding
chr1	120056833	120057144	0#	2#[AGGGGAAG:61:0.9496545689046608] [GGGGGAAG:10:0.8746876521289542]	1#[TGACCA:243:0.8180826906887997]	313	84	22	123.14	19.77	0.07	+	NM_006623	Body	Gene Body	120055941	976	PHGDH	26227	protein-coding
chr1	120340863	120341219	1#[CACTTCCCTTTTT:172:0.886468041654403]	1#[GTTCCTCT:7:0.9279064825938323]	0#	358	195	16	116.27	30.72	0.08	-	NM_001200001	Body	Gene Body	120413840	-72782	NOTCH2	4853	protein-coding
chr1	120364629	120364921	0#	0#	1#[TGACCT:277:1.0]	294	79	26	207.46	39.31	0.03	-	NM_001200001	Body	Gene Body	120413840	-49132	NOTCH2	4853	protein-coding
chr1	120368427	120368593	1#[AAAAGGGGAAATG:23:0.8370086106136762]	0#	0#	168	84	14	140.42	35.84	0.04	-	NM_001200001	Body	Gene Body	120413840	-45329	NOTCH2	4853	protein-coding
chr1	120959580	120960266	1#[CACTTCCTCATTG:226:0.8992440432374733]	1#[AGTGGAAG:490:0.8808814310639483]	2#[AGGTCA:217:1.0] [TGACCA:38:0.8180826906887997]	688	472	89	812.07	65.6	0	+	NR_003955	UE	Upstream Enhancer	120962432	-2380	EMBP1	647121	pseudo
chr1	142721707	142722310	0#	5#[CTTCCTCT:178:1.0000000000000002] [TGGGGAAG:427:0.925367388796723] [CTTCCCCC:389:0.874687652128954] [CTTCTTCT:66:0.8392187832339122] [CTTCTTCT:190:0.8392187832339122]	1#[TGGTCA:571:0.8180826906887997]	605	385	60	231.69	18.27	0.03	+	NR_034178	Body	Gene Body	142627087	95005	SRGAP2B	647135	pseudo
chr1	143244864	143245301	0#	2#[CTTCCTCC:190:0.9250330832242935] [GGCGGAAG:242:0.8620675461948546]	0#	439	217	62	130.39	9.75	0.06	-	NR_024584	UE	Upstream Enhancer	143233326	11755	LOC728875	728875	miscRNA
chr1	143582880	143583313	0#	1#[TGAGGAAG:316:0.9757128198920622]	0#	435	167	72	473.91	30.1	0	-	NM_014644	Body	Gene Body	143706379	-123332	PDE4DIP	9659	protein-coding
chr1	143700511	143701404	0#	1#[TGAGGAAG:518:0.9757128198920622]	4#[GGGTCA:135:0.8857896050338628] [TGACCC:269:0.8857896050338628] [GGGTCA:448:0.8857896050338628] [TGGTCA:239:0.8180826906887997]	895	532	309	1889.7	46.83	0	-	NM_014644	Body	Gene Body	143706379	-5336	PDE4DIP	9659	protein-coding
chr1	143711361	143712369	0#	3#[AGGGGAAG:336:0.9496545689046608] [AGGGGAAG:638:0.9496545689046608] [AGGGGAAA:236:0.8406605293598248]	0#	1010	647	139	499.67	22.71	0	-	NM_001198832	Body	Gene Body	143751349	-39341	PDE4DIP	9659	protein-coding
chr1	143741153	143742132	1#[GAATGAGGAAGTG:397:0.9250100565787833]	3#[AGAGGAAG:17:1.0] [TGAGGAAC:355:0.9036193024858946] [TGAGGAAA:713:0.8667187803472263]	5#[TGACCT:417:1.0] [AGGTCA:546:1.0] [TGACCT:880:1.0] [TGACCC:583:0.8857896050338628] [TGGTCA:424:0.8180826906887997]	981	396	272	1650.67	44.64	0	-	NM_001198832	Body	Gene Body	143751349	-9800	PDE4DIP	9659	protein-coding
chr1	143807651	143808105	0#	1#[GGAGGAAG:189:0.9250330832242935]	0#	456	201	59	237.09	16.79	0.03	+	NM_004892	PP	Proximal Promoter	143807763	89	SEC22B	9554	protein-coding
chr1	143834244	143834513	1#[AAAAGAGGAAGTC:214:0.8913317838010807]	1#[AGAGGAAC:13:0.9279064825938323]	0#	271	212	20	183.23	30.72	0.04	+	NM_004892	DE	DownStream Enhancer	143807763	26693	SEC22B	9554	protein-coding
chr1	143902513	143903036	1#[CACTTCCTCTTTT:308:1.0]	2#[CTTCCCCT:120:0.9496545689046608] [CTTCCTCC:203:0.9250330832242935]	2#[TGACCT:476:1.0] [TGGTCA:156:0.8180826906887997]	525	342	50	400.78	38.21	0.03	+	NM_203458	UE	Upstream Enhancer	143920467	-17612	NOTCH2NL	388677	protein-coding
chr1	143943174	143943287	0#	2#[GTTCCTCA:46:0.9036193024858946] [GTTCCTCA:81:0.9036193024858946]	0#	115	57	8	115.02	20.48	0.09	+	NM_203458	Body	Gene Body	143920467	22764	NOTCH2NL	388677	protein-coding
chr1	143964972	143965203	0#	1#[CTTCCTCT:109:1.0000000000000002]	0#	233	90	62	722.05	74.51	0	+	NM_203458	Body	Gene Body	143920467	44595	NOTCH2NL	388677	protein-coding
chr1	143970287	143970431	0#	1#[AGGGGAAG:60:0.9496545689046608]	0#	146	73	12	140.42	30.72	0.04	+	NM_203458	Body	Gene Body	143920467	49893	NOTCH2NL	388677	protein-coding
chr1	143992668	143993395	1#[AAAAAGGGAAGTG:489:0.8864680416544026]	1#[AGAGGAAC:655:0.9279064825938323]	0#	729	489	69	360.66	29.67	0.03	+	NM_203458	Body	Gene Body	143920467	72690	NOTCH2NL	388677	protein-coding
chr1	144108674	144109402	0#	2#[CTTCCTCA:201:0.9757128198920624] [CTTCCCGT:673:0.83930650285721]	2#[GGGTCA:570:0.8857896050338628] [TGGTCA:462:0.8180826906887997]	730	176	60	360.26	40.7	0.03	+	NM_213652	UE	Upstream Enhancer	144124547	-15697	HFE2	148738	protein-coding
chr1	144138778	144139204	1#[AAAAGGGGAAGTT:216:0.8082753791768466]	0#	0#	428	235	54	494.13	66.36	0	+	NM_006472	UE	Upstream Enhancer	144149818	-10805	TXNIP	10628	protein-coding
chr1	144151286	144151700	1#[AAAACAGGAACTG:238:0.8395440792228539]	1#[AGAGGAAG:281:1.0]	1#[GGGTCA:28:0.8857896050338628]	416	272	47	338.31	33.06	0.02	+	NM_006472	Body	Gene Body	144149818	1740	TXNIP	10628	protein-coding
chr1	144160661	144161095	0#	4#[CTTCCTCC:174:0.9250330832242935] [TGAGGAAA:275:0.8667187803472263] [TCAGGAAG:318:0.8653647538446115] [TTTCCCCT:359:0.8406605293598248]	0#	436	173	52	366.39	40.17	0.03	-	NM_032305	DE	DownStream Enhancer	144181744	-20910	POLR3GL	84265	protein-coding
chr1	144162795	144163380	1#[CACTTCCTCTTAT:334:0.8321035131169422]	0#	2#[TGGTCA:217:0.8180826906887997] [TGGTCA:431:0.8180826906887997]	587	301	54	231.11	21.16	0.03	-	NM_032305	DE	DownStream Enhancer	144181744	-18648	POLR3GL	84265	protein-coding
chr1	144166507	144167224	0#	4#[CTTCCTCA:293:0.9757128198920624] [CTTCCTCC:398:0.9250330832242935] [CTTCCTGT:418:0.8896519339525494] [CTTCCCCC:452:0.874687652128954]	2#[TGACCT:325:1.0] [GGGTCA:47:0.8857896050338628]	719	223	74	468.54	30.11	0	-	NM_032305	DE	DownStream Enhancer	144181744	-15014	POLR3GL	84265	protein-coding
chr1	144168491	144168981	0#	2#[CTTCCTCC:90:0.9250330832242935] [CTTCCGCA:427:0.9127472828626235]	0#	492	316	33	133.83	14.71	0.05	-	NM_032305	Body	Gene Body	144181744	-12937	POLR3GL	84265	protein-coding
chr1	144181495	144182066	0#	1#[CTTCCTCA:240:0.9757128198920624]	2#[AGGTCA:170:1.0] [GGGTCA:440:0.8857896050338628]	573	336	53	268.41	19.99	0.04	-	NM_032305	PP	Proximal Promoter	144181744	87	POLR3GL	84265	protein-coding
chr1	144273471	144274341	0#	4#[AGAGGAAG:652:1.0] [TGGGGAAG:555:0.925367388796723] [GGAGGAAG:565:0.9250330832242935] [TGCGGAAG:267:0.9127472828626235]	0#	872	666	113	535.48	33.22	0	+	NM_144698	Body	Gene Body	144260565	13572	ANKRD35	148741	protein-coding
chr1	144300589	144301406	0#	4#[CTTCCTCA:639:0.9757128198920624] [AGCGGAAG:8:0.9370344629705611] [CTTCCCCA:252:0.925367388796723] [CTTCCTCG:691:0.8840323149896212]	3#[TGACCC:331:0.8857896050338628] [TGACCC:419:0.8857896050338628] [TGACCC:739:0.8857896050338628]	819	618	82	512	35.98	0	-	NM_001012758	PP	Proximal Promoter	144300792	415	NUDT17	200035	protein-coding
chr1	144321809	144322188	0#	0#	1#[GGGTCA:296:0.8857896050338628]	381	201	30	152.65	15.21	0.03	-	NM_006468	PP	Proximal Promoter	144322241	-231	POLR3C	10623	protein-coding
chr1	144341508	144341795	1#[CACTTCCCCTTTT:96:0.959771347207595]	0#	0#	289	116	17	135.22	30.23	0.05	+	NM_014455	Body	Gene Body	144322392	19232	RNF115	27246	protein-coding
chr1	144398177	144398544	0#	1#[AGAGGAAG:202:1.0]	0#	369	221	28	172.21	28.42	0.03	+	NM_014455	Body	Gene Body	144322392	76006	RNF115	27246	protein-coding
chr1	144449509	144450109	0#	1#[CTTCCTCT:393:1.0000000000000002]	1#[TGACCT:445:1.0]	602	368	50	299.3	34.88	0.04	+	NM_001201325	Body	Gene Body	144439022	10855	PDZK1	5174	protein-coding
chr1	144990404	144990815	1#[AAATGAGGAAGTG:122:0.9412280449548224]	1#[CTTCCACA:16:0.8565942509560106]	1#[TGACCA:104:0.8180826906887997]	413	150	62	739.58	112.63	0	-	NR_024442	UE	Upstream Enhancer	144981223	9331	LOC728989	728989	pseudo
chr1	145185230	145185987	2#[GACTTCCTCTTTT:107:0.891331783801081] [CACTTCCCCTTCT:547:0.8093047619639978]	2#[CTTCCTCT:508:1.0000000000000002] [CTTCCTGA:391:0.8653647538446115]	2#[AGGTCA:373:1.0] [TGGTCA:217:0.8180826906887997]	759	547	64	482.36	53.16	0	+	NM_001256336	Body	Gene Body	145180914	4863	CHD1L	9557	protein-coding
chr1	145425173	145425594	0#	1#[AGAGGAAG:241:1.0]	0#	423	251	40	239.09	28.53	0.03	-	NR_038423	Body	Gene Body	145456323	-30899	LINC00624	100289211	miscRNA
chr1	145610650	145611055	1#[AAAACAGGAAGTG:157:0.9248757402387296]	1#[GGAGGAAC:349:0.8529395658181258]	3#[AGGTCA:106:1.0] [TGACCT:217:1.0] [TGGTCA:224:0.8180826906887997]	407	176	35	275.19	41.53	0.04	-	NM_016361	PP	Proximal Promoter	145609258	1568	ACP6	51205	protein-coding
chr1	146246312	146246833	0#	2#[AGGGGAAG:189:0.9496545689046608] [AGGGGAAG:254:0.9496545689046608]	1#[TGGTCA:225:0.8180826906887997]	523	204	69	503.29	40.54	0	-	NR_049810	DE	DownStream Enhancer	146273302	-26786	MIR5087	100847044	miscRNA
chr1	146256810	146257460	0#	2#[AGGGGAAG:198:0.9496545689046608] [TGGGGAAG:526:0.925367388796723]	0#	652	236	31	154.6	13.08	0.03	-	NR_049810	DE	DownStream Enhancer	146273302	-16256	MIR5087	100847044	miscRNA
chr1	146608052	146608283	0#	0#	1#[TGACCC:120:0.8857896050338628]	233	152	18	170.53	33.28	0.03	-	NM_001164261	UE	Upstream Enhancer	146569160	39044	PPIAL4D	645142	protein-coding
chr1	147587420	147587709	0#	2#[TGGGGAAG:76:0.925367388796723] [TGTGGAAG:126:0.8565942509560106]	0#	291	170	15	119.21	33.28	0.08	+	NR_027484	UE	Upstream Enhancer	147635917	-48327	FCGR1C	100132417	pseudo
chr1	147617186	147617344	0#	1#[CTTCCTCT:79:1.0000000000000002]	1#[TGACCA:137:0.8180826906887997]	160	80	16	180.57	40.96	0.04	+	NR_027484	UE	Upstream Enhancer	147635917	-18651	FCGR1C	100132417	pseudo
chr1	147962897	147963189	1#[CAAAGAGGAAGTG:193:0.9580159982826502]	0#	0#	294	214	25	196.14	35.9	0.04	+	NR_046135	DE	DownStream Enhancer	147842885	120226	FAM91A2	57234	miscRNA
chr1	147964848	147965173	1#[CACTTCCTCCTTG:217:0.8771263644524355]	0#	0#	327	221	45	253.88	20.28	0.03	+	NR_046135	DE	DownStream Enhancer	147842885	122184	FAM91A2	57234	miscRNA
chr1	148123021	148123531	0#	2#[TGAGGAAG:271:0.9757128198920622] [AGGGGAAC:59:0.8775610514984932]	1#[TGACCA:114:0.8180826906887997]	512	290	37	245.21	23.81	0.03	-	NM_003528	Body	Gene Body	148124856	-1545	HIST2H2BE	8349	protein-coding
chr1	148123790	148124133	0#	1#[TGCGGAAC:202:0.8406537654564559]	1#[TGACCG:144:0.8490319803691448]	345	179	34	256.6	34.77	0.04	-	NM_003528	PP	Proximal Promoter	148124856	-887	HIST2H2BE	8349	protein-coding
chr1	148152708	148153097	1#[GACTTCCTGTTTT:215:0.8162075240398107]	2#[CTTCCACT:99:0.8808814310639483] [AGGGGAAA:276:0.8406605293598248]	0#	391	224	31	187.54	23.87	0.04	-	NM_014849	Body	Gene Body	148156058	-3126	SV2A	9900	protein-coding
chr1	148154091	148154797	0#	4#[CTTCCTCA:390:0.9757128198920624] [TGAGGAAG:456:0.9757128198920622] [TTTCCTCT:227:0.8910059604551641] [CTTCCACA:350:0.8565942509560106]	4#[AGGTCA:415:1.0] [TGACCC:127:0.8857896050338628] [TGACCC:307:0.8857896050338628] [TGACCA:114:0.8180826906887997]	708	455	43	134.39	13.08	0.05	-	NM_014849	Body	Gene Body	148156058	-1512	SV2A	9900	protein-coding
chr1	148166064	148166542	0#	2#[TGGGGAAG:71:0.925367388796723] [CTTCCACT:269:0.8808814310639483]	1#[TGACCT:255:1.0]	480	248	40	166.03	13.95	0.03	-	NM_005850	PP	Proximal Promoter	148166768	-456	SF3B4	10262	protein-coding
chr1	148200631	148200922	0#	2#[CTTCCCCA:277:0.925367388796723] [CTTCCTGT:114:0.8896519339525494]	0#	293	116	23	213.67	35.84	0.04	-	NM_020205	Body	Gene Body	148249310	-48563	OTUD7B	56957	protein-coding
chr1	148236190	148236609	0#	0#	1#[TGACCC:215:0.8857896050338628]	421	197	28	151.62	20.81	0.04	-	NM_020205	Body	Gene Body	148249310	-12923	OTUD7B	56957	protein-coding
chr1	148305776	148306537	0#	3#[GGAGGAAG:668:0.9250330832242935] [GTTCCTCA:398:0.9036193024858946] [AGCGGAAC:607:0.8649409455643936]	0#	763	354	74	314.32	21.96	0.02	+	NM_007259	PP	Proximal Promoter	148305965	165	VPS45	11311	protein-coding
chr1	148328814	148329253	0#	3#[CTTCCTCT:95:1.0000000000000002] [CTTCCTCT:260:1.0000000000000002] [CTTCCCCT:243:0.9496545689046608]	0#	441	257	38	366.91	66.56	0.03	+	NM_007259	Body	Gene Body	148305965	23106	VPS45	11311	protein-coding
chr1	148398059	148398794	0#	1#[TGAGGAAG:477:0.9757128198920622]	4#[AGGTCA:177:1.0] [TGACCC:412:0.8857896050338628] [TGACCC:485:0.8857896050338628] [TGACCA:554:0.8180826906887997]	737	486	72	335.93	32.85	0.02	+	NM_016274	Body	Gene Body	148388793	9752	PLEKHO1	51177	protein-coding
chr1	148399294	148399756	0#	4#[CTTCCTCA:218:0.9757128198920624] [GTTCCTCT:172:0.9279064825938323] [AGGGGAAC:69:0.8775610514984932] [AGGGGAAA:147:0.8406605293598248]	0#	464	161	96	711	40.47	0	+	NM_016274	DE	DownStream Enhancer	148388793	10662	PLEKHO1	51177	protein-coding
chr1	148402981	148403377	1#[AAATAGGGAAGTG:231:0.8276960866092254]	2#[GTTCCTCT:260:0.9279064825938323] [CTTCCTCC:25:0.9250330832242935]	1#[AGGTCA:140:1.0]	398	246	55	314.21	24.46	0.02	+	NM_016274	DE	DownStream Enhancer	148388793	14434	PLEKHO1	51177	protein-coding
chr1	148422012	148422325	1#[AAAACAGGAAGTG:100:0.9248757402387296]	1#[AGAAGAAG:89:0.839218783233912]	0#	315	96	22	168.39	31.01	0.03	+	NM_016274	DE	DownStream Enhancer	148388793	33315	PLEKHO1	51177	protein-coding
chr1	148452363	148452758	0#	3#[AGAGGAAG:133:1.0] [AGGGGAAG:255:0.9496545689046608] [AGCGGAAG:144:0.9370344629705611]	3#[TGACCT:373:1.0] [TGACCC:94:0.8857896050338628] [TGACCG:214:0.8490319803691448]	397	163	48	205.96	14.87	0.03	-	NM_030920	DE	DownStream Enhancer	148475128	-22602	ANP32E	81611	protein-coding
chr1	148507789	148508620	0#	3#[CTTCCTCT:229:1.0000000000000002] [AGAGGAAA:639:0.8910059604551641] [CGGGGAAG:179:0.8336868838942818]	2#[TGGTCA:49:0.8180826906887997] [TGACCA:77:0.8180826906887997]	833	259	59	259.75	17.89	0.04	-	NM_001243772	PP	Proximal Promoter	148508233	-185	APH1A	51107	protein-coding
chr1	148602538	148602968	1#[CACTTCCTCATTT:113:0.9412280449548228]	1#[TGAGGAAA:96:0.8667187803472263]	2#[AGGTCA:54:1.0] [TGGTCA:149:0.8180826906887997]	432	157	49	356.2	29.07	0.03	+	NM_015203	PP	Proximal Promoter	148603613	-918	RPRD2	23248	protein-coding
chr1	148604335	148605400	1#[CAGTTCCTCTTTT:354:0.9146683389841244]	1#[GGAGGAAG:873:0.9250330832242935]	1#[TGACCA:288:0.8180826906887997]	1067	325	101	646.65	44.19	0	+	NM_015203	Body	Gene Body	148603613	1047	RPRD2	23248	protein-coding
chr1	148791102	148791984	0#	1#[AGGGGAAG:404:0.9496545689046608]	5#[AGGTCA:20:1.0] [TGACCT:787:1.0] [TGACCT:876:1.0] [TGACCA:31:0.8180826906887997] [TGACCA:241:0.8180826906887997]	884	419	137	642.89	31.77	0	+	NR_036211	PP	Proximal Promoter	148791028	493	MIR4257	100422997	miscRNA
chr1	148818470	148818841	0#	3#[AGCGGAAG:225:0.9370344629705611] [TGGGGAAG:194:0.925367388796723] [AGGGGAAA:334:0.8406605293598248]	0#	373	237	59	450.59	42.93	0	-	NM_001197320	PP	Proximal Promoter	148818838	-131	MCL1	4170	protein-coding
chr1	148850533	148851042	0#	4#[AGAGGAAG:58:1.0] [TGGGGAAG:234:0.925367388796723] [CTTCCTCC:477:0.9250330832242935] [AGGGGAAA:263:0.8406605293598248]	0#	511	247	117	1198.74	84.37	0	-	NM_001197320	UE	Upstream Enhancer	148818838	31942	MCL1	4170	protein-coding
chr1	148852552	148852986	1#[AAAAAAGGAAATG:191:0.803933957852889]	1#[AGAGGAAG:217:1.0]	0#	436	247	68	380.29	27.04	0.03	-	NM_207045	DE	DownStream Enhancer	148868233	-15434	ENSA	2029	protein-coding
chr1	148874461	148874734	0#	2#[AGAGGAAG:1:1.0] [AGAGGAAG:33:1.0]	0#	275	85	15	122.84	30.72	0.07	-	NM_207045	UE	Upstream Enhancer	148868233	6313	ENSA	2029	protein-coding
chr1	149002810	149003253	1#[AAAATGGGAAGTG:69:0.8660989017509262]	1#[CTTCCTCA:159:0.9757128198920624]	0#	445	119	27	198.29	32.3	0.04	-	NM_004079	Body	Gene Body	149005057	-2128	CTSS	1520	protein-coding
chr1	149004617	149005180	1#[AAATGAGGAAGTG:316:0.9412280449548224]	1#[CTTCCTGA:82:0.8653647538446115]	0#	565	335	108	845.92	54.2	0	-	NM_004079	PP	Proximal Promoter	149005057	-105	CTSS	1520	protein-coding
chr1	149091799	149092181	1#[GAAAGAGGAAGTG:217:0.9837820116239603]	2#[TTTCCTCT:252:0.8910059604551641] [TGAGGAAA:109:0.8667187803472263]	1#[AGGTCA:367:1.0]	384	235	128	1478.22	113.86	0	-	NM_001668	Body	Gene Body	149115868	-23834	ARNT	405	protein-coding
chr1	149165240	149165877	0#	4#[CTTCCCCT:233:0.9496545689046608] [CTTCCCCA:471:0.925367388796723] [CTTCCTCC:254:0.9250330832242935] [AGAGGAAA:570:0.8910059604551641]	3#[TGACCC:164:0.8857896050338628] [TGACCG:189:0.8490319803691448] [TGACCA:406:0.8180826906887997]	639	479	48	170.86	10.13	0.03	+	NM_001145415	PP	Proximal Promoter	149165438	281	SETDB1	9869	protein-coding
chr1	149216214	149216771	0#	5#[CTTCCTCT:406:1.0000000000000002] [CTTCCTCA:50:0.9757128198920624] [AGGGGAAG:112:0.9496545689046608] [TGTGGAAG:527:0.8565942509560106] [AGGGGAAA:213:0.8406605293598248]	1#[AGGTCA:547:1.0]	559	400	134	857.06	35.29	0	-	NM_181746	UE	Upstream Enhancer	149214103	2511	CERS2	29956	protein-coding
chr1	149242270	149242620	0#	2#[TGAGGAAG:171:0.9757128198920622] [AGGGGAAA:271:0.8406605293598248]	0#	352	186	60	548.92	46.27	0	-	NM_001163260	Body	Gene Body	149245897	-3441	FAM63A	55793	protein-coding
chr1	149245818	149246269	0#	0#	1#[TGACCC:65:0.8857896050338628]	453	200	52	287.09	28.59	0.04	-	NM_001163260	PP	Proximal Promoter	149245897	121	FAM63A	55793	protein-coding
chr1	149247330	149247790	0#	1#[GTTCCTCC:232:0.8529395658181256]	0#	462	254	55	217.75	14.53	0.04	+	NM_021222	PP	Proximal Promoter	149247596	-12	PRUNE	58497	protein-coding
chr1	149298125	149298990	0#	3#[CTTCCCCA:23:0.925367388796723] [AGAGGAAA:53:0.8910059604551641] [GGCGGAAG:601:0.8620675461948546]	0#	867	620	70	343.36	22.91	0.02	-	NM_020239	PP	Proximal Promoter	149298749	-4	CDC42SE1	56882	protein-coding
chr1	149396114	149396707	0#	4#[CTTCCTCA:553:0.9757128198920624] [GGAGGAAG:146:0.9250330832242935] [ACAGGAAG:133:0.8896519339525494] [GGGGGAAG:385:0.8746876521289542]	1#[CGGTCA:354:0.8490319803691448]	595	167	57	206.26	11.71	0.03	+	NM_001204848	PP	Proximal Promoter	149395728	553	TNFAIP8L2-SCNM1	100534012	protein-coding
chr1	149404859	149405452	0#	1#[ACAGGAAG:283:0.8896519339525494]	1#[AGGTCA:29:1.0]	595	249	74	309.05	14.33	0.02	+	NM_001204856	PP	Proximal Promoter	149405121	-13	SCNM1	79005	protein-coding
chr1	149415074	149415497	0#	2#[CTTCCACT:194:0.8808814310639483] [GTTCCTCC:255:0.8529395658181256]	2#[AGGTCA:311:1.0] [TGGTCA:170:0.8180826906887997]	425	185	30	178.36	19.77	0.04	-	NM_013353	PP	Proximal Promoter	149415171	88	TMOD4	29765	protein-coding
chr1	149429180	149429525	0#	1#[GGCGGAAG:138:0.8620675461948546]	0#	347	146	27	173.8	17.48	0.03	-	NM_005997	PP	Proximal Promoter	149429264	62	VPS72	6944	protein-coding
chr1	149493556	149494399	0#	4#[CTTCCTCT:732:1.0000000000000002] [GGAGGAAG:311:0.9250330832242935] [GGCGGAAG:212:0.8620675461948546] [GTTCCTCC:28:0.8529395658181256]	2#[CGGTCA:562:0.8490319803691448] [TGGTCA:573:0.8180826906887997]	845	627	39	178.37	14.04	0.04	+	NM_002810	PP	Proximal Promoter	149493820	363	PSMD4	5710	protein-coding
chr1	149516117	149516949	0#	5#[CTTCCTCT:312:1.0000000000000002] [CTTCCTCT:377:1.0000000000000002] [CTTCCTCA:635:0.9757128198920624] [TTTCCTCT:76:0.8910059604551641] [CTTCCACA:671:0.8565942509560106]	7#[TGACCT:227:1.0] [TGACCT:406:1.0] [TGACCT:466:1.0] [GGGTCA:10:0.8857896050338628] [TGACCC:803:0.8857896050338628] [TGGTCA:65:0.8180826906887997] [TGGTCA:252:0.8180826906887997]	834	377	55	314.21	20.78	0.02	+	NM_020832	UE	Upstream Enhancer	149521414	-4920	ZNF687	57592	protein-coding
chr1	149520388	149521156	0#	0#	2#[TGACCC:59:0.8857896050338628] [TGGTCA:419:0.8180826906887997]	770	382	41	139.98	8.05	0.04	+	NM_020832	PP	Proximal Promoter	149521414	-644	ZNF687	57592	protein-coding
chr1	149529994	149530399	0#	3#[CTTCCTCT:343:1.0000000000000002] [GGAGGAAG:126:0.9250330832242935] [CTTCCGCA:255:0.9127472828626235]	3#[TGACCT:200:1.0] [TGACCC:153:0.8857896050338628] [TGACCA:333:0.8180826906887997]	407	280	52	357.49	23.66	0.03	+	NM_020832	Body	Gene Body	149521414	8860	ZNF687	57592	protein-coding
chr1	149565982	149566332	0#	4#[AGAGGAAG:192:1.0] [TGGGGAAG:300:0.925367388796723] [AGAGGAAA:229:0.8910059604551641] [CGAGGAAG:48:0.8840323149896212]	0#	352	206	32	196.85	22.51	0.04	-	NM_002651	PP	Proximal Promoter	149566757	-569	PI4KB	5298	protein-coding
chr1	149595786	149596335	0#	1#[ATTCCTCT:98:0.840598909800833]	2#[AGGTCA:106:1.0] [TGGTCA:226:0.8180826906887997]	551	161	74	376.86	25.05	0.03	-	NM_000449	UE	Upstream Enhancer	149586393	9554	RFX5	5993	protein-coding
chr1	149609119	149609723	1#[CACTTCCTGCTTT:337:0.8439861064085148]	0#	0#	606	339	86	494.57	23.9	0	-	NM_001258289	Body	Gene Body	149611834	-2376	SELENBP1	8991	protein-coding
chr1	149638464	149638820	0#	1#[CTTCCGCT:171:0.9370344629705614]	0#	358	140	30	160.05	14.31	0.03	+	NM_002796	PP	Proximal Promoter	149638664	-60	PSMB4	5692	protein-coding
chr1	149698478	149698698	0#	1#[CTTCCGCC:126:0.8620675461948546]	0#	222	129	30	266.29	30.98	0.04	-	NM_015100	PP	Proximal Promoter	149698565	42	POGZ	23126	protein-coding
chr1	149752042	149752565	1#[CAGTTCCTCATTG:359:0.8139123822215977]	1#[CTTCCCCT:315:0.9496545689046608]	0#	525	349	43	188.31	19.84	0.04	+	NM_020770	Body	Gene Body	149750485	1906	CGN	57530	protein-coding
chr1	149798160	149798578	1#[CATTTCCTCTTTT:101:0.8772372634060817]	2#[AGGGGAAG:303:0.9496545689046608] [TGAGGAAC:371:0.9036193024858946]	1#[TGACCT:133:1.0]	420	113	23	135.89	17.91	0.05	+	NM_020127	Body	Gene Body	149779404	18869	TUFT1	7286	protein-coding
chr1	149824721	149824972	0#	1#[CTTCCTCA:139:0.9757128198920624]	0#	253	175	31	159.75	14.71	0.03	+	NM_020127	DE	DownStream Enhancer	149779404	45492	TUFT1	7286	protein-coding
chr1	149940918	149941188	1#[AAATGAGGAAATG:163:0.818465308360904]	0#	0#	272	189	18	129.96	26.43	0.06	-	NM_001172648	Body	Gene Body	149955416	-14309	CELF3	11189	protein-coding
chr1	150085147	150085637	0#	1#[CTTCCTGT:270:0.8896519339525494]	1#[TGACCC:317:0.8857896050338628]	492	262	64	621.03	73.35	0	-	NM_182578	DE	DownStream Enhancer	150092797	-7388	THEM5	284486	protein-coding
chr1	150097071	150097616	0#	2#[AGAGGAAG:192:1.0] [AGAGGAAA:112:0.8910059604551641]	1#[TGACCT:327:1.0]	547	202	41	338.07	49.53	0.02	-	NM_182578	UE	Upstream Enhancer	150092797	4476	THEM5	284486	protein-coding
chr1	150111862	150112337	0#	2#[AGAGGAAG:192:1.0] [TGAGGAAG:217:0.9757128198920622]	1#[TGACCA:136:0.8180826906887997]	477	218	74	786.93	102.94	0	-	NM_053055	Body	Gene Body	150148985	-36905	THEM4	117145	protein-coding
chr1	150160653	150161236	0#	1#[TGGGGAAG:429:0.925367388796723]	2#[AGGTCA:518:1.0] [TGACCC:254:0.8857896050338628]	585	158	27	120.03	16.33	0.08	-	NM_053055	UE	Upstream Enhancer	150148985	11826	THEM4	117145	protein-coding
chr1	150231325	150232014	0#	1#[CTTCCTCT:297:1.0000000000000002]	0#	691	311	65	286.6	18.47	0.04	-	NM_002966	Body	Gene Body	150233338	-1702	S100A10	6281	protein-coding
chr1	150275336	150275996	1#[CACTTCCTCTTCC:406:0.8333154263803636]	4#[AGAGGAAG:74:1.0] [CTTCCCCA:522:0.925367388796723] [GTTCCTCC:107:0.8529395658181256] [AGAAGAAG:648:0.839218783233912]	2#[TGACCC:273:0.8857896050338628] [TGACCC:365:0.8857896050338628]	662	408	157	1376.83	72.26	0	-	NM_005620	PP	Proximal Promoter	150276135	-391	S100A11	6282	protein-coding
chr1	150277070	150277776	1#[CACTTCCTTATTT:432:0.8679247394016307]	0#	2#[GGGTCA:63:0.8857896050338628] [TGACCA:403:0.8180826906887997]	708	433	81	410.15	30.19	0.03	-	NM_005620	PP	Proximal Promoter	150276135	1368	S100A11	6282	protein-coding
chr1	150358052	150358348	1#[AAATGAGGAACTG:202:0.855896383938947]	1#[CTTCCTCA:229:0.9757128198920624]	0#	298	214	20	175.07	40.96	0.04	-	NM_007113	UE	Upstream Enhancer	150353180	5086	TCHH	7062	protein-coding
chr1	150366198	150366527	1#[CACTTCCTTGTTT:187:0.8229931558490569]	0#	0#	331	157	41	218.63	17.96	0.04	-	NM_007113	UE	Upstream Enhancer	150353180	13175	TCHH	7062	protein-coding
chr1	150404867	150405094	1#[CACTTCCTGTTTC:124:0.9086577518626905]	1#[CTTCTTCT:154:0.8392187832339122]	0#	229	110	25	222.55	30.78	0.03	-	NM_001122965	UE	Upstream Enhancer	150398328	6649	RPTN	126638	protein-coding
chr1	150438118	150438387	1#[GACTTCCTCTTTT:129:0.891331783801081]	0#	1#[AGGTCA:58:1.0]	271	118	21	195.76	43.52	0.04	-	NM_001122965	UE	Upstream Enhancer	150398328	39908	RPTN	126638	protein-coding
chr1	150743016	150743305	1#[CACTTCCTCCTTA:149:0.8718039409755814]	0#	0#	291	153	16	130.32	35.84	0.06	+	NM_178438	UE	Upstream Enhancer	150749943	-6774	LCE5A	254910	protein-coding
chr1	150861820	150862289	0#	2#[CTTCCCCT:169:0.9496545689046608] [GGAGGAAG:294:0.9250330832242935]	3#[AGGTCA:111:1.0] [AGGTCA:393:1.0] [TGACCA:163:0.8180826906887997]	471	174	75	569.3	48.38	0	-	NM_178431	PP	Proximal Promoter	150862203	-209	LCE3A	353142	protein-coding
chr1	150996610	150996988	1#[CACTTCCTCTTTT:140:1.0]	2#[GGAGGAAG:294:0.9250330832242935] [AGTGGAAG:181:0.8808814310639483]	0#	380	150	19	120.4	20.97	0.07	+	NM_001025231	PP	Proximal Promoter	150997129	-369	KPRP	448834	protein-coding
chr1	151261536	151261836	1#[GAAAAGGGAAGTG:105:0.8702500532783634]	0#	0#	302	126	32	343.81	61.44	0.02	+	NM_003125	UE	Upstream Enhancer	151270302	-8640	SPRR1B	6699	protein-coding
chr1	151545955	151546587	1#[AGAAGGGGAAGTG:143:0.8093047619639977]	1#[CTTCCCCC:457:0.874687652128954]	2#[TGACCT:485:1.0] [GGGTCA:344:0.8857896050338628]	634	157	46	135.22	13.95	0.05	-	NM_052891	Body	Gene Body	151549818	-3706	PGLYRP3	114771	protein-coding
chr1	151583636	151584268	0#	3#[TGAGGAAG:339:0.9757128198920622] [CTTCCTCC:426:0.9250330832242935] [TGAGGAAA:546:0.8667187803472263]	2#[TGACCT:238:1.0] [TGACCA:597:0.8180826906887997]	634	351	101	537.09	35.28	0	-	NM_020393	Body	Gene Body	151587646	-3659	PGLYRP4	57115	protein-coding
chr1	151594674	151594989	0#	2#[TTTCCTCT:205:0.8910059604551641] [ACAGGAAG:108:0.8896519339525494]	0#	317	107	25	154.14	24.48	0.03	+	NM_002965	UE	Upstream Enhancer	151596953	-2172	S100A9	6280	protein-coding
chr1	151596672	151597020	0#	2#[CTTCCCCA:326:0.925367388796723] [CTTCCTCC:73:0.9250330832242935]	0#	350	127	31	146.03	11.63	0.04	+	NM_002965	PP	Proximal Promoter	151596953	-154	S100A9	6280	protein-coding
chr1	151629052	151629523	0#	2#[GGAGGAAG:305:0.9250330832242935] [TGAGGAAC:216:0.9036193024858946]	0#	473	235	31	162.94	24.84	0.03	-	NM_002964	Body	Gene Body	151630288	-1001	S100A8	6279	protein-coding
chr1	151630010	151630616	0#	2#[AGAGGAAG:346:1.0] [TCAGGAAG:52:0.8653647538446115]	2#[TGACCC:75:0.8857896050338628] [TGGTCA:498:0.8180826906887997]	608	358	40	193.17	20.08	0.04	-	NM_002964	PP	Proximal Promoter	151630288	80	S100A8	6279	protein-coding
chr1	151709743	151710174	0#	2#[CTTCCTCT:33:1.0000000000000002] [ACAGGAAG:219:0.8896519339525494]	2#[TGACCT:382:1.0] [TGACCA:147:0.8180826906887997]	433	231	29	123.09	16.78	0.07	-	NM_002963	UE	Upstream Enhancer	151699761	10213	S100A7	6278	protein-coding
chr1	151779797	151780651	0#	3#[GGAGGAAG:280:0.9250330832242935] [CTTCCCCC:268:0.874687652128954] [ATTCCTCT:388:0.840598909800833]	3#[AGGTCA:604:1.0] [GGGTCA:102:0.8857896050338628] [TGACCC:639:0.8857896050338628]	856	269	109	526.21	36.3	0	-	NM_002962	PP	Proximal Promoter	151780865	-799	S100A5	6276	protein-coding
chr1	151784341	151785291	0#	4#[AGGGGAAG:555:0.9496545689046608] [CTTCCCCA:454:0.925367388796723] [GGAGGAAG:832:0.9250330832242935] [AGAAGAAG:523:0.839218783233912]	1#[TGACCT:584:1.0]	952	553	64	180.39	9.79	0.04	-	NM_002961	PP	Proximal Promoter	151784906	-12	S100A4	6275	protein-coding
chr1	151792996	151793457	0#	2#[GGAGGAAG:233:0.9250330832242935] [AGAGGAAA:324:0.8910059604551641]	1#[TGACCT:33:1.0]	463	242	36	176.82	20.64	0.04	-	NM_002960	UE	Upstream Enhancer	151788358	4880	S100A3	6274	protein-coding
chr1	151805269	151806004	0#	4#[CTTCCCCT:489:0.9496545689046608] [TGGGGAAG:35:0.925367388796723] [CTTCCTCC:387:0.9250330832242935] [CTTCCTGT:441:0.8896519339525494]	0#	737	423	51	157.65	10.34	0.03	-	NM_005978	PP	Proximal Promoter	151804930	762	S100A2	6273	protein-coding
chr1	151812290	151812649	0#	1#[TGAGGAAC:74:0.9036193024858946]	2#[AGGTCA:21:1.0] [TGGTCA:334:0.8180826906887997]	361	101	27	143	17.84	0.04	-	NM_005978	UE	Upstream Enhancer	151804930	7461	S100A2	6273	protein-coding
chr1	151837560	151838364	0#	1#[CTTCCTCC:492:0.9250330832242935]	3#[TGACCT:472:1.0] [GGGTCA:178:0.8857896050338628] [TGACCC:385:0.8857896050338628]	806	669	178	1764.24	104.65	0	-	NM_080388	DE	DownStream Enhancer	151852138	-13909	S100A16	140576	protein-coding
chr1	151850006	151850338	0#	1#[CTTCCCCT:187:0.9496545689046608]	1#[AGGTCA:19:1.0]	334	251	26	119.02	15.78	0.08	-	NM_080388	Body	Gene Body	151852138	-1881	S100A16	140576	protein-coding
chr1	151988488	151988844	0#	1#[CTTCCTCT:2:1.0000000000000002]	1#[GGGTCA:339:0.8857896050338628]	358	249	32	145.38	13.18	0.04	+	NM_023015	Body	Gene Body	151967190	21547	INTS3	65123	protein-coding
chr1	152012205	152012949	0#	6#[AGAGGAAG:90:1.0] [CTTCCCCT:596:0.9496545689046608] [CTTCCGCA:470:0.9127472828626235] [AGTGGAAG:444:0.8808814310639483] [TTTCCCCT:66:0.8406605293598248] [AGGGGAAA:251:0.8406605293598248]	1#[TGGTCA:680:0.8180826906887997]	746	545	46	150.84	13.08	0.04	+	NM_023015	Body	Gene Body	151967190	45560	INTS3	65123	protein-coding
chr1	152014407	152014882	0#	1#[AGAGGAAG:175:1.0]	0#	477	202	50	311.11	28.34	0.02	+	NM_024330	PP	Proximal Promoter	152014391	218	SLC27A3	11000	protein-coding
chr1	152022416	152022881	0#	1#[AGGGGAAG:208:0.9496545689046608]	0#	467	196	50	223.81	18.36	0.03	+	NM_024330	DE	DownStream Enhancer	152014391	8221	SLC27A3	11000	protein-coding
chr1	152029556	152030007	0#	2#[GTTCCTCA:305:0.9036193024858946] [TGTGGAAG:286:0.8565942509560106]	1#[TGACCC:329:0.8857896050338628]	453	334	50	262.59	23.98	0.04	+	NM_024330	DE	DownStream Enhancer	152014391	15499	SLC27A3	11000	protein-coding
chr1	152030122	152031146	2#[AAAAGAGGAAGTG:325:0.9999999999999994] [AAAAGAGGAAGTG:654:0.9999999999999994]	1#[AGGGGAAG:948:0.9496545689046608]	2#[TGACCT:722:1.0] [GGGTCA:828:0.8857896050338628]	1026	341	232	1793.09	48.56	0	+	NM_024330	DE	DownStream Enhancer	152014391	16072	SLC27A3	11000	protein-coding
chr1	152042562	152042949	0#	2#[CTTCCTCA:200:0.9757128198920624] [GGGGGAAG:260:0.8746876521289542]	0#	389	226	21	112.89	24.11	0.1	-	NM_020699	DE	DownStream Enhancer	152162075	-119287	GATAD2B	57459	protein-coding
chr1	152091310	152091682	0#	1#[CTTCCTCA:104:0.9757128198920624]	2#[TGACCT:175:1.0] [TGGTCA:192:0.8180826906887997]	374	139	28	127.69	13.92	0.06	-	NM_020699	Body	Gene Body	152162075	-70626	GATAD2B	57459	protein-coding
chr1	152093457	152093823	1#[CAGTTCCTCTTTC:153:0.8984503506080851]	0#	0#	368	141	26	204.2	43.6	0.03	-	NM_020699	Body	Gene Body	152162075	-68477	GATAD2B	57459	protein-coding
chr1	152184144	152184621	0#	4#[AGAGGAAG:269:1.0] [AGGGGAAG:220:0.9496545689046608] [AGGGGAAG:252:0.9496545689046608] [CTTCCTGA:236:0.8653647538446115]	0#	479	275	97	595.21	29.87	0	-	NM_014856	Body	Gene Body	152185778	-1359	DENND4B	9909	protein-coding
chr1	152184902	152185521	0#	4#[TGAGGAAG:169:0.9757128198920622] [AGAGGAAC:373:0.9279064825938323] [CTTCCCCA:361:0.925367388796723] [ACGGGAAG:122:0.83930650285721]	1#[TGACCC:246:0.8857896050338628]	621	377	94	560.37	37.47	0	-	NM_014856	PP	Proximal Promoter	152185778	-499	DENND4B	9909	protein-coding
chr1	152185816	152186289	0#	1#[AGAGGAAG:323:1.0]	1#[TGACCC:100:0.8857896050338628]	475	336	35	154.99	12.46	0.03	-	NM_014856	PP	Proximal Promoter	152185778	374	DENND4B	9909	protein-coding
chr1	152396831	152397270	0#	2#[TTTCCTCT:225:0.8910059604551641] [ACAGGAAG:407:0.8896519339525494]	0#	441	214	47	115.17	9.57	0.09	-	NM_001043352	Body	Gene Body	152422349	-25304	TPM3	7170	protein-coding
chr1	152397398	152397912	1#[CACTTCCCTTTTT:242:0.886468041654403]	1#[TGAGGAAA:163:0.8667187803472263]	1#[TGGTCA:498:0.8180826906887997]	516	250	80	588.66	43.83	0	-	NM_001043352	Body	Gene Body	152422349	-24701	TPM3	7170	protein-coding
chr1	152419406	152419791	0#	2#[CTTCCTCA:244:0.9757128198920624] [CTTCCCCA:227:0.925367388796723]	0#	387	269	54	431.42	49.02	0.03	-	NM_001043352	Body	Gene Body	152422349	-2674	TPM3	7170	protein-coding
chr1	152421158	152422050	0#	3#[CTTCCTCT:366:1.0000000000000002] [TGGGGAAG:585:0.925367388796723] [AGAGGAAA:289:0.8910059604551641]	2#[AGGTCA:153:1.0] [AGGTCA:721:1.0]	894	381	124	724.42	29.8	0	-	NM_001043352	PP	Proximal Promoter	152422349	-810	TPM3	7170	protein-coding
chr1	152431322	152431705	0#	2#[AGAGGAAG:151:1.0] [CTTCCCGT:248:0.83930650285721]	3#[AGGTCA:359:1.0] [TGACCC:98:0.8857896050338628] [TGGTCA:285:0.8180826906887997]	385	232	47	306.41	30.41	0.02	-	NM_152263	PP	Proximal Promoter	152431233	321	TPM3	7170	protein-coding
chr1	152459305	152460108	0#	5#[AGAGGAAG:478:1.0] [TGGGGAAG:699:0.925367388796723] [GGGGGAAG:321:0.8746876521289542] [GGGGGAAG:652:0.8746876521289542] [CTTCCCCC:401:0.874687652128954]	1#[TGGTCA:253:0.8180826906887997]	805	474	107	389.84	22.79	0.03	+	NM_001127320	PP	Proximal Promoter	152459278	501	UBAP2L	9898	protein-coding
chr1	152511223	152511801	0#	2#[TGAGGAAG:409:0.9757128198920622] [GGAGGAAG:310:0.9250330832242935]	2#[AGGTCA:95:1.0] [CGGTCA:319:0.8490319803691448]	580	445	66	297.45	21.51	0.04	+	NM_006118	PP	Proximal Promoter	152511662	6	HAX1	10456	protein-coding
chr1	152566669	152567017	0#	1#[GTTCCCCT:249:0.8775610514984932]	0#	350	252	30	145.8	17.83	0.04	+	NM_020452	PP	Proximal Promoter	152566899	22	ATP8B2	57198	protein-coding
chr1	152644148	152644602	0#	2#[GGAGGAAG:122:0.9250330832242935] [GTTCCTCA:288:0.9036193024858946]	0#	456	301	70	522.19	39.06	0	+	NM_000565	PP	Proximal Promoter	152644292	157	IL6R	3570	protein-coding
chr1	152646126	152646862	0#	4#[GGAGGAAG:444:0.9250330832242935] [ACAGGAAG:565:0.8896519339525494] [TCAGGAAG:376:0.8653647538446115] [AGGGGAAA:652:0.8406605293598248]	0#	738	457	105	671.09	31.78	0	+	NM_000565	Body	Gene Body	152644292	2291	IL6R	3570	protein-coding
chr1	152647263	152647776	0#	2#[AGAGGAAG:374:1.0] [TGAGGAAC:87:0.9036193024858946]	4#[TGACCC:430:0.8857896050338628] [TGACCC:436:0.8857896050338628] [TGACCG:306:0.8490319803691448] [TGGTCA:262:0.8180826906887997]	515	389	34	110.07	11.31	0.1	+	NM_000565	Body	Gene Body	152644292	3360	IL6R	3570	protein-coding
chr1	152732310	152732700	0#	3#[AGAGGAAG:243:1.0] [AGGGGAAG:16:0.9496545689046608] [AGAGGAAA:210:0.8910059604551641]	1#[TGACCT:358:1.0]	392	239	45	399.75	51.5	0.03	-	NM_001010846	Body	Gene Body	152741150	-8601	SHE	126669	protein-coding
chr1	152896700	152897111	0#	0#	0#	413	138	44	277.11	26.89	0.04	-	NM_001111	UE	Upstream Enhancer	152847348	49490	ADAR	103	protein-coding
chr1	152959806	152960312	0#	2#[TGGGGAAG:36:0.925367388796723] [TGGGGAAG:381:0.925367388796723]	0#	508	394	41	218.63	17.72	0.04	-	NM_170782	Body	Gene Body	153098962	-138762	KCNN3	3782	protein-coding
chr1	152988096	152988816	0#	3#[AGAGGAAG:684:1.0] [AGAGGAAC:466:0.9279064825938323] [TGTGGAAG:382:0.8565942509560106]	2#[TGACCA:19:0.8180826906887997] [TGACCA:453:0.8180826906887997]	722	244	43	208.39	17.8	0.04	-	NM_170782	Body	Gene Body	153098962	-110622	KCNN3	3782	protein-coding
chr1	153046185	153046573	1#[CAAAGAGGAACTG:158:0.8726843372667745]	1#[AGAGGAAA:174:0.8910059604551641]	0#	390	163	28	173.74	23.53	0.03	-	NM_170782	Body	Gene Body	153098962	-52614	KCNN3	3782	protein-coding
chr1	153049131	153049485	0#	1#[ACAGGAAG:163:0.8896519339525494]	0#	356	178	22	131.4	21.8	0.06	-	NM_170782	Body	Gene Body	153098962	-49653	KCNN3	3782	protein-coding
chr1	153059039	153059706	1#[GAAAGAGGAAGTA:378:0.8451196230911928]	1#[CTTCCCCT:444:0.9496545689046608]	4#[AGGTCA:526:1.0] [TGACCC:117:0.8857896050338628] [TGACCC:228:0.8857896050338628] [GGGTCA:463:0.8857896050338628]	669	435	49	171.74	14.36	0.03	-	NM_170782	Body	Gene Body	153098962	-39488	KCNN3	3782	protein-coding
chr1	153099502	153099899	1#[CACTTCCTTTTTA:170:0.8793902692526042]	1#[ACGGGAAG:242:0.83930650285721]	0#	399	186	57	241.28	16.87	0.03	-	NM_170782	PP	Proximal Promoter	153098962	726	KCNN3	3782	protein-coding
chr1	153102854	153103057	0#	1#[TGGGGAAG:71:0.925367388796723]	0#	205	81	34	215.84	18.47	0.04	-	NM_001204087	Body	Gene Body	153109378	-6443	KCNN3	3782	protein-coding
chr1	153170303	153170531	0#	0#	1#[AGGTCA:106:1.0]	230	147	17	148.98	29.07	0.04	-	NM_006556	Body	Gene Body	153176108	-5658	PMVK	10654	protein-coding
chr1	153175469	153176341	0#	4#[CTTCCCCA:84:0.925367388796723] [CTTCCTCC:677:0.9250330832242935] [TTTCCTCT:260:0.8910059604551641] [GGAGGAAC:656:0.8529395658181258]	3#[CGGTCA:238:0.8490319803691448] [TGACCG:461:0.8490319803691448] [TGGTCA:19:0.8180826906887997]	874	260	64	158.24	9.61	0.03	-	NM_006556	PP	Proximal Promoter	153176108	-379	PMVK	10654	protein-coding
chr1	153213269	153214237	0#	1#[TGTGGAAG:769:0.8565942509560106]	3#[TGACCC:229:0.8857896050338628] [TGACCC:339:0.8857896050338628] [TGACCA:885:0.8180826906887997]	970	717	81	205.91	12.09	0.03	+	NM_001826	PP	Proximal Promoter	153213741	245	CKS1B	1163	protein-coding
chr1	153236520	153236808	0#	3#[AGAGGAAG:127:1.0] [AGGGGAAG:88:0.9496545689046608] [TGGGGAAG:111:0.925367388796723]	0#	290	99	33	247.77	28.5	0.03	+	NM_001252406	UE	Upstream Enhancer	153241729	-5110	ZBTB7B	51043	protein-coding
chr1	153238215	153238522	0#	3#[GTTCCCCT:243:0.8775610514984932] [CTTCCTGA:254:0.8653647538446115] [GTTCCTCC:37:0.8529395658181256]	0#	309	69	23	139.85	15	0.04	+	NM_001252406	UE	Upstream Enhancer	153241729	-3445	ZBTB7B	51043	protein-coding
chr1	153247055	153247482	0#	1#[CTTCCTCT:178:1.0000000000000002]	0#	429	157	31	150.28	16.61	0.04	+	NM_001252406	Body	Gene Body	153241729	5483	ZBTB7B	51043	protein-coding
chr1	153289437	153290131	0#	3#[CTTCCTCC:482:0.9250330832242935] [CTTCCGCA:550:0.9127472828626235] [GTTCCCCT:223:0.8775610514984932]	0#	696	226	98	570.64	39.12	0	-	NR_040772	PP	Proximal Promoter	153290265	-602	LOC100505666	100505666	miscRNA
chr1	153323939	153324331	0#	2#[CTTCCTCT:235:1.0000000000000002] [CGAGGAAG:127:0.8840323149896212]	1#[CGGTCA:186:0.8490319803691448]	394	139	29	149.84	13.57	0.04	+	NM_004952	Body	Gene Body	153317971	6107	EFNA3	1944	protein-coding
chr1	153374214	153374961	0#	1#[AGAGGAAG:246:1.0]	3#[GGGTCA:179:0.8857896050338628] [TGACCC:225:0.8857896050338628] [TGACCG:548:0.8490319803691448]	749	262	64	222.01	15.7	0.03	+	NM_018845	PP	Proximal Promoter	153374911	-435	SLC50A1	55974	protein-coding
chr1	153417955	153418654	1#[GAAAGGGGAAGTG:496:0.9435533588315553]	1#[CTTCCCCA:647:0.925367388796723]	4#[TGACCT:189:1.0] [TGACCT:241:1.0] [TGACCC:205:0.8857896050338628] [TGACCC:565:0.8857896050338628]	701	524	62	301.88	23.64	0.03	+	NR_046328	Body	Gene Body	153412886	5593	TRIM46	80128	protein-coding
chr1	153446889	153447493	1#[CACTTCCTGTTTT:449:0.9248757402387298]	1#[AGTGGAAG:393:0.8808814310639483]	2#[AGGTCA:107:1.0] [TGACCC:256:0.8857896050338628]	606	415	36	150.45	18.41	0.04	+	NM_002455	Body	Gene Body	153445113	2191	MTX1	4580	protein-coding
chr1	153462942	153463331	0#	1#[GTTCCTCT:155:0.9279064825938323]	0#	391	145	36	147.58	16.52	0.04	-	NR_002188	PP	Proximal Promoter	153463949	-862	GBAP1	2630	pseudo
chr1	153477492	153477922	0#	2#[CTTCCTCT:267:1.0000000000000002] [ACAGGAAG:222:0.8896519339525494]	2#[GGGTCA:43:0.8857896050338628] [GGGTCA:190:0.8857896050338628]	432	223	36	176.82	18.42	0.04	-	NM_001171812	PP	Proximal Promoter	153477690	25	GBA	2629	protein-coding
chr1	153486949	153487795	0#	2#[GTTCCTCT:349:0.9279064825938323] [TTTCCCCT:480:0.8406605293598248]	3#[AGGTCA:242:1.0] [GGGTCA:614:0.8857896050338628] [GGGTCA:645:0.8857896050338628]	848	327	180	1268.96	67.17	0	-	NM_006589	Body	Gene Body	153491898	-4622	FAM189B	10712	protein-coding
chr1	153498524	153499046	0#	1#[CTTCCACT:317:0.8808814310639483]	1#[TGACCG:403:0.8490319803691448]	524	335	59	329.22	26.66	0.02	-	NM_005698	PP	Proximal Promoter	153498800	59	SCAMP3	10067	protein-coding
chr1	153509869	153510145	0#	1#[GGCGGAAG:172:0.8620675461948546]	0#	278	173	24	118.04	11.31	0.08	-	NM_003993	PP	Proximal Promoter	153509905	137	CLK2	1196	protein-coding
chr1	153560590	153561146	0#	2#[TTTCCCCT:151:0.8406605293598248] [TTTCCCCT:215:0.8406605293598248]	0#	558	145	35	168.79	19.47	0.03	+	NM_001105205	PP	Proximal Promoter	153560351	384	RUSC1	23623	protein-coding
chr1	153846142	153846629	0#	1#[CTTCCGCT:106:0.9370344629705614]	0#	489	96	29	143.45	15.92	0.04	+	NM_018116	PP	Proximal Promoter	153846584	-346	MSTO1	55154	protein-coding
chr1	153882760	153883205	0#	2#[CTTCCCCA:266:0.925367388796723] [ACAGGAAG:123:0.8896519339525494]	1#[TGGTCA:147:0.8180826906887997]	447	257	42	120.19	9.53	0.07	-	NM_001198901	DE	DownStream Enhancer	153925443	-42426	YY1AP1	55249	protein-coding
chr1	153993482	153993875	1#[GAAAGAGGAAGTC:276:0.8751137954250415]	2#[CTTCCCCC:72:0.874687652128954] [TTTCCTCA:124:0.8667187803472263]	1#[TGGTCA:183:0.8180826906887997]	395	315	19	114.94	18.46	0.1	-	NM_001037533	Body	Gene Body	154093596	-99799	GON4L	54856	protein-coding
chr1	154095725	154096928	0#	4#[TGGGGAAG:709:0.925367388796723] [CTTCCTCC:866:0.9250330832242935] [CTTCCCCC:339:0.874687652128954] [CTTCCTGA:91:0.8653647538446115]	4#[TGACCT:352:1.0] [TGACCG:385:0.8490319803691448] [CGGTCA:1041:0.8490319803691448] [TGGTCA:517:0.8180826906887997]	1205	109	86	219.71	13.47	0.04	+	NM_152280	PP	Proximal Promoter	154095883	-49	SYT11	23208	protein-coding
chr1	154170631	154171090	0#	1#[CTTCCGCC:212:0.8620675461948546]	0#	461	193	40	148.77	11.91	0.03	-	NM_014949	PP	Proximal Promoter	154170812	12	KIAA0907	22889	protein-coding
chr1	154177109	154177417	0#	2#[CTTCCTCT:163:1.0000000000000002] [ACAGGAAG:149:0.8896519339525494]	1#[AGGTCA:199:1.0]	310	164	100	954.7	57.67	0	+	NM_181885	PP	Proximal Promoter	154178103	-830	RXFP4	339403	protein-coding
chr1	154186500	154186841	1#[AAAACAGGAAGTC:82:0.8162075240398106]	1#[CTTCCTCC:250:0.9250330832242935]	2#[AGGTCA:122:1.0] [GGGTCA:273:0.8857896050338628]	343	95	38	193.23	18.61	0.04	-	NM_004723	Body	Gene Body	154214590	-27995	ARHGEF2	9181	protein-coding
chr1	154204022	154204421	0#	3#[CTTCCCCT:214:0.9496545689046608] [CTTCCACA:285:0.8565942509560106] [AGAAGAAG:124:0.839218783233912]	0#	401	284	29	122.81	12.4	0.07	-	NM_004723	Body	Gene Body	154214590	-10284	ARHGEF2	9181	protein-coding
chr1	154206801	154207733	1#[GAAAGGGGAAGTG:356:0.9435533588315553]	2#[AGGGGAAG:307:0.9496545689046608] [TCAGGAAG:744:0.8653647538446115]	1#[GGGTCA:502:0.8857896050338628]	934	374	255	2099.68	75.38	0	-	NM_004723	Body	Gene Body	154214590	-7415	ARHGEF2	9181	protein-coding
chr1	154214691	154215288	0#	6#[GTTCCTCA:295:0.9036193024858946] [ACAGGAAG:256:0.8896519339525494] [GGGGGAAG:208:0.8746876521289542] [TCAGGAAG:330:0.8653647538446115] [TTTCCCCT:461:0.8406605293598248] [TTTCCCCT:568:0.8406605293598248]	0#	599	294	113	859.45	53.4	0	-	NM_004723	PP	Proximal Promoter	154214590	395	ARHGEF2	9181	protein-coding
chr1	154226271	154226876	0#	3#[CTTCCTCT:267:1.0000000000000002] [TGGGGAAG:280:0.925367388796723] [GGGGGAAG:310:0.8746876521289542]	2#[TGACCC:242:0.8857896050338628] [TGGTCA:288:0.8180826906887997]	607	297	91	451.44	22.18	0	-	NM_004723	UE	Upstream Enhancer	154214590	11978	ARHGEF2	9181	protein-coding
chr1	154291046	154291723	0#	3#[TGGGGAAG:397:0.925367388796723] [GGAGGAAG:418:0.9250330832242935] [ACGGGAAG:180:0.83930650285721]	1#[TGACCC:278:0.8857896050338628]	679	469	62	242.35	17.75	0.03	+	NM_001145264	PP	Proximal Promoter	154291140	375	LAMTOR2	28956	protein-coding
chr1	154291854	154292560	1#[GAAAGGGGAAGTC:478:0.8348851426326365]	2#[TGAGGAAG:158:0.9757128198920622] [CTTCCCCT:7:0.9496545689046608]	1#[AGGTCA:330:1.0]	708	478	90	497.46	26.76	0	+	NM_001145264	Body	Gene Body	154291140	1192	LAMTOR2	28956	protein-coding
chr1	154302850	154303106	0#	1#[CTTCCGCA:81:0.9127472828626235]	0#	258	83	26	207.46	30	0.03	+	NM_020387	Body	Gene Body	154297589	5344	RAB25	57111	protein-coding
chr1	154326048	154326370	0#	1#[CTTCCTCT:147:1.0000000000000002]	1#[AGGTCA:32:1.0]	324	162	42	274.55	29.07	0.04	+	NR_047544	Body	Gene Body	154318992	7218	LMNA	4000	protein-coding
chr1	154350527	154351162	0#	2#[AGGGGAAG:398:0.9496545689046608] [CTTCCCCC:474:0.874687652128954]	1#[TGACCC:241:0.8857896050338628]	637	231	54	212.18	14.81	0.04	+	NM_005572	PP	Proximal Promoter	154351084	-326	LMNA	4000	protein-coding
chr1	154362463	154363940	0#	10#[CTTCCTCA:1336:0.9757128198920624] [CTTCCCCT:250:0.9496545689046608] [CTTCCCCA:500:0.925367388796723] [AGAGGAAA:315:0.8910059604551641] [TTTCCTCT:636:0.8910059604551641] [CTTCCTGT:135:0.8896519339525494] [GTTCCCCT:646:0.8775610514984932] [TGGGGAAC:157:0.8532738713905553] [TGGGGAAC:774:0.8532738713905553] [CTTCCCCG:1288:0.8336868838942818]	2#[GGGTCA:446:0.8857896050338628] [GGGTCA:593:0.8857896050338628]	1479	1330	166	681.93	19.97	0	+	NM_001257374	PP	Proximal Promoter	154362574	1219	LMNA	4000	protein-coding
chr1	154461780	154462204	0#	1#[GGAGGAAG:296:0.9250330832242935]	0#	426	229	38	300.97	34.67	0.03	+	NM_001199662	Body	Gene Body	154449402	12607	PMF1-BGLAP	100527963	protein-coding
chr1	154613903	154614440	0#	5#[CTTCCTCT:157:1.0000000000000002] [CTTCCTCA:310:0.9757128198920624] [CTTCCTGA:90:0.8653647538446115] [TGTGGAAG:230:0.8565942509560106] [GTTCCCCA:217:0.8532738713905553]	2#[TGACCC:173:0.8857896050338628] [TGACCC:464:0.8857896050338628]	539	163	45	256	23.26	0.04	+	NR_046115	Body	Gene Body	154605603	8463	RHBG	57127	protein-coding
chr1	154617633	154617957	1#[CACTTCCTTCTTC:88:0.8295890722405536]	4#[AGGGGAAG:271:0.9496545689046608] [TGGGGAAG:299:0.925367388796723] [CTTCCTGT:136:0.8896519339525494] [TGAGGAAA:18:0.8667187803472263]	0#	326	98	22	124.06	18.36	0.07	+	NR_046115	Body	Gene Body	154605603	12128	RHBG	57127	protein-coding
chr1	154626855	154627173	1#[GAGAGAGGAAGTG:64:0.8159749523179656]	0#	0#	320	81	27	178.27	27.13	0.04	+	NR_046115	DE	DownStream Enhancer	154605603	21333	RHBG	57127	protein-coding
chr1	154667739	154668114	0#	7#[CTTCCTCT:194:1.0000000000000002] [TGGGGAAG:177:0.925367388796723] [TGGGGAAG:341:0.925367388796723] [CTTCCTCC:60:0.9250330832242935] [CTTCCTGT:252:0.8896519339525494] [CTTCCCCC:115:0.874687652128954] [GTTCCTCC:49:0.8529395658181256]	0#	377	211	37	321.65	53.67	0.02	-	NR_029691	UE	Upstream Enhancer	154656845	11105	MIR9-1	407046	miscRNA
chr1	154631370	154631820	0#	2#[AGGGGAAG:264:0.9496545689046608] [GTTCCTCT:300:0.9279064825938323]	0#	452	292	37	144.67	15.77	0.04	-	NM_006365	DE	DownStream Enhancer	154665808	-34146	C1orf61	10485	protein-coding
chr1	154716306	154716871	0#	1#[CTTCCCCT:370:0.9496545689046608]	0#	567	383	42	210.79	27.83	0.04	-	NM_005920	Body	Gene Body	154737153	-20464	MEF2D	4209	protein-coding
chr1	154727584	154728092	0#	1#[AGAGGAAC:219:0.9279064825938323]	1#[TGGTCA:378:0.8180826906887997]	510	232	78	391.77	24.77	0.03	-	NM_005920	Body	Gene Body	154737153	-9337	MEF2D	4209	protein-coding
chr1	154728974	154729511	0#	1#[CTTCCACT:62:0.8808814310639483]	2#[GGGTCA:258:0.8857896050338628] [TGGTCA:86:0.8180826906887997]	539	181	41	161.97	14.53	0.03	-	NM_005920	Body	Gene Body	154737153	-7998	MEF2D	4209	protein-coding
chr1	154736946	154737693	0#	3#[CTTCCCCA:412:0.925367388796723] [CTTCCTCC:216:0.9250330832242935] [GGAGGAAG:520:0.9250330832242935]	0#	749	172	40	147.76	11.53	0.04	-	NM_005920	PP	Proximal Promoter	154737153	-35	MEF2D	4209	protein-coding
chr1	154760257	154760647	1#[GACTTCCTCCTTT:154:0.810442149970866]	0#	0#	392	165	28	169.24	30.74	0.03	-	NM_178229	DE	DownStream Enhancer	154809020	-48598	IQGAP3	128239	protein-coding
chr1	154789461	154789855	0#	2#[CTTCCTCA:198:0.9757128198920624] [CTTCCTGA:303:0.8653647538446115]	1#[AGGTCA:153:1.0]	396	229	21	118.8	21.71	0.08	-	NM_178229	Body	Gene Body	154809020	-19330	IQGAP3	128239	protein-coding
chr1	154820496	154820773	0#	1#[GTTCCTCC:215:0.8529395658181256]	1#[AGGTCA:187:1.0]	279	138	28	151.62	15.41	0.04	+	NM_001105669	Body	Gene Body	154816142	4492	TTC24	164118	protein-coding
chr1	154836148	154836607	0#	1#[GTTCCCCT:237:0.8775610514984932]	0#	461	236	73	660.9	65.89	0	-	NM_182679	Body	Gene Body	154837903	-1519	GPATCH4	54865	protein-coding
chr1	154880117	154880625	1#[AGAAGAGGAAGTG:214:0.8495334147564026]	4#[TGGGGAAG:300:0.925367388796723] [GGAGGAAG:206:0.9250330832242935] [AGAGGAAA:49:0.8910059604551641] [TTTCCTCA:314:0.8667187803472263]	3#[GGGTCA:25:0.8857896050338628] [GGGTCA:434:0.8857896050338628] [TGGTCA:412:0.8180826906887997]	510	214	132	967.7	39.89	0	+	NM_021948	Body	Gene Body	154878363	1968	BCAN	63827	protein-coding
chr1	154920664	154920881	0#	1#[CTTCCTCA:109:0.9757128198920624]	0#	219	109	35	401.03	57.12	0.03	-	NM_006617	UE	Upstream Enhancer	154913813	6960	NES	10763	protein-coding
chr1	154928626	154929118	0#	3#[GGGGGAAG:138:0.8746876521289542] [TCAGGAAG:121:0.8653647538446115] [AGGGGAAA:369:0.8406605293598248]	2#[TGACCC:53:0.8857896050338628] [TGACCC:357:0.8857896050338628]	494	146	41	207.72	23.26	0.04	-	NM_006617	UE	Upstream Enhancer	154913813	14959	NES	10763	protein-coding
chr1	154962116	154962783	1#[CACTTCCTCTTTC:312:0.9837820116239607]	1#[TTTCCTCT:564:0.8910059604551641]	1#[TGACCG:181:0.8490319803691448]	669	307	243	2074.24	70.53	0	-	NM_030980	Body	Gene Body	154964329	-1906	ISG20L2	81875	protein-coding
chr1	154964557	154965452	0#	2#[CTTCCTGT:849:0.8896519339525494] [CTTCCACT:793:0.8808814310639483]	0#	897	587	89	332.93	20.86	0.02	+	NM_015997	PP	Proximal Promoter	154964886	258	RRNAD1	51093	protein-coding
chr1	154977405	154978003	0#	4#[AGAGGAAG:535:1.0] [ACAGGAAG:236:0.8896519339525494] [CTTCCTGT:418:0.8896519339525494] [AGAAGAAG:386:0.839218783233912]	0#	600	275	57	148.99	10.43	0.04	-	NM_145729	PP	Proximal Promoter	154977547	133	MRPL24	79590	protein-coding
chr1	155092845	155093433	1#[CACTTCCCCTTTA:148:0.9124649220133914]	1#[GTTCCTCA:24:0.9036193024858946]	2#[GGGTCA:106:0.8857896050338628] [TGACCC:125:0.8857896050338628]	590	116	44	244.92	22.87	0.03	+	NM_001007792	Body	Gene Body	155052165	40796	NTRK1	4914	protein-coding
chr1	155102769	155103074	0#	3#[CTTCCTCT:165:1.0000000000000002] [TGAGGAAG:97:0.9757128198920622] [CTTCCCCC:217:0.874687652128954]	2#[TGACCT:47:1.0] [TGGTCA:121:0.8180826906887997]	307	114	34	160.86	13.09	0.03	+	NM_001007792	Body	Gene Body	155052165	50718	NTRK1	4914	protein-coding
chr1	155040926	155041380	0#	0#	0#	456	221	25	113.73	18.6	0.1	-	NM_001161442	DE	DownStream Enhancer	155053264	-12117	SH2D2A	9047	protein-coding
chr1	155137663	155138185	0#	2#[GGAGGAAG:172:0.9250330832242935] [CTTCCTCC:220:0.9250330832242935]	2#[GGGTCA:440:0.8857896050338628] [TGACCA:507:0.8180826906887997]	524	219	38	170.67	17.41	0.03	+	NM_001080471	Body	Gene Body	155130146	7736	PEAR1	375033	protein-coding
chr1	155143771	155144217	0#	2#[AGAGGAAG:200:1.0] [CTTCTTCT:288:0.8392187832339122]	0#	448	202	35	190.92	21.42	0.04	+	NM_001080471	Body	Gene Body	155130146	13827	PEAR1	375033	protein-coding
chr1	155200066	155200384	0#	1#[CTTCCTGT:214:0.8896519339525494]	1#[TGGTCA:170:0.8180826906887997]	320	195	26	138.64	15.5	0.04	-	NM_198236	Body	Gene Body	155281786	-81525	ARHGEF11	9826	protein-coding
chr1	155335760	155336305	0#	3#[AGAGGAAG:236:1.0] [AGAGGAAG:276:1.0] [CTTCCCCA:397:0.925367388796723]	2#[GGGTCA:317:0.8857896050338628] [TGGTCA:223:0.8180826906887997]	547	385	31	159.75	19.08	0.03	-	NM_001004341	PP	Proximal Promoter	155336224	-79	ETV3L	440695	protein-coding
chr1	155342655	155343241	0#	4#[AGAGGAAG:374:1.0] [CTTCCCCT:224:0.9496545689046608] [CTTCCTCC:191:0.9250330832242935] [TTTCCTCT:82:0.8910059604551641]	2#[AGGTCA:363:1.0] [TGACCA:130:0.8180826906887997]	588	388	47	306.6	41.02	0.02	-	NM_001004341	UE	Upstream Enhancer	155336224	6819	ETV3L	440695	protein-coding
chr1	155353613	155354351	1#[CACTTCCTGTTTT:421:0.9248757402387298]	1#[CTTCCCCC:265:0.874687652128954]	3#[TGACCT:180:1.0] [TGACCT:608:1.0] [TGACCG:57:0.8490319803691448]	740	412	75	316.52	20.28	0.02	+	NR_001560	UE	Upstream Enhancer	155364777	-10752	CYCSP52	360155	pseudo
chr1	155748468	155749081	1#[AAAAGAGGAAGTG:193:0.9999999999999994]	1#[CTTCTTCT:567:0.8392187832339122]	2#[AGGTCA:135:1.0] [TGGTCA:416:0.8180826906887997]	615	211	79	614.42	52.44	0	-	NM_031281	DE	DownStream Enhancer	155788934	-40255	FCRL5	83416	protein-coding
chr1	156010384	156010822	1#[AAAAGAGGAAATG:204:0.8772372634060811]	0#	0#	440	228	50	485.91	83.06	0	-	NM_030764	Body	Gene Body	156013546	-2934	FCRL2	79368	protein-coding
chr1	156181135	156181500	0#	2#[TTTCCTCA:95:0.8667187803472263] [CTTCTTCT:70:0.8392187832339122]	0#	367	163	17	124.95	30.72	0.07	+	NM_018240	UE	Upstream Enhancer	156229686	-48388	KIRREL	55243	protein-coding
chr1	156484549	156484976	0#	2#[TGGGGAAG:228:0.925367388796723] [GGAGGAAG:156:0.9250330832242935]	0#	429	189	48	252.04	17.1	0.03	+	NM_001763	UE	Upstream Enhancer	156490550	-5812	CD1A	909	protein-coding
chr1	156485126	156485579	0#	1#[CTTCCTCT:302:1.0000000000000002]	0#	455	297	43	302.64	36.18	0.02	+	NM_001763	UE	Upstream Enhancer	156490550	-5127	CD1A	909	protein-coding
chr1	156494351	156494672	1#[CACTTCCTCTTCT:168:0.8495334147564029]	0#	0#	323	161	28	253.51	47.88	0.03	+	NM_001763	Body	Gene Body	156490550	3962	CD1A	909	protein-coding
chr1	156522109	156522766	0#	5#[TGGGGAAG:232:0.925367388796723] [TGGGGAAG:455:0.925367388796723] [GGAGGAAG:265:0.9250330832242935] [ACAGGAAG:464:0.8896519339525494] [TGAGGAAA:316:0.8667187803472263]	0#	659	446	143	1158.94	36.78	0	+	NM_001765	UE	Upstream Enhancer	156526186	-3631	CD1C	911	protein-coding
chr1	156801008	156801491	1#[GAAAGAGGAAGTC:222:0.8751137954250415]	1#[TTTCCTCT:405:0.8910059604551641]	1#[TGACCT:287:1.0]	485	227	50	450.24	67.83	0.02	-	NM_001160325	PP	Proximal Promoter	156800018	1217	OR6P1	128366	protein-coding
chr1	156807815	156808018	0#	1#[AGAGGAAG:129:1.0]	0#	205	134	14	123.72	25.58	0.07	-	NM_001160325	UE	Upstream Enhancer	156800018	7931	OR6P1	128366	protein-coding
chr1	156854641	156854962	0#	1#[AGAGGAAG:116:1.0]	1#[TGACCA:304:0.8180826906887997]	323	101	18	121.89	30.05	0.07	-	NM_003126	Body	Gene Body	156923130	-68388	SPTA1	6708	protein-coding
chr1	156891025	156891265	0#	1#[ACAGGAAG:148:0.8896519339525494]	1#[TGACCC:89:0.8857896050338628]	242	160	19	172.3	39.53	0.03	-	NM_003126	Body	Gene Body	156923130	-31945	SPTA1	6708	protein-coding
chr1	157045686	157046111	0#	3#[CTTCCTCT:113:1.0000000000000002] [AGAGGAAC:189:0.9279064825938323] [GTTCCTCA:172:0.9036193024858946]	0#	427	213	29	131.68	18.78	0.06	+	NM_002432	UE	Upstream Enhancer	157067791	-21892	MNDA	4332	protein-coding
chr1	157046678	157047172	0#	0#	0#	496	240	50	243.5	27.4	0.03	+	NM_002432	UE	Upstream Enhancer	157067791	-20873	MNDA	4332	protein-coding
chr1	157067364	157067841	1#[CAAAGAGGAACTG:284:0.8726843372667745]	0#	1#[TGACCT:150:1.0]	479	297	51	509.93	78.31	0	+	NM_002432	PP	Proximal Promoter	157067791	-130	MNDA	4332	protein-coding
chr1	157188534	157188798	0#	2#[CTTCCTGT:103:0.8896519339525494] [CTTCCCCG:168:0.8336868838942818]	0#	266	95	19	109.85	15.12	0.1	+	NM_198930	Body	Gene Body	157167960	20669	PYHIN1	149628	protein-coding
chr1	157188823	157189278	1#[GGAAGAGGAAGTG:171:0.8333154263803634]	2#[CTTCCCCT:209:0.9496545689046608] [GTTCCTCC:199:0.8529395658181256]	0#	457	191	123	1034.37	50.48	0	+	NM_198930	Body	Gene Body	157167960	21054	PYHIN1	149628	protein-coding
chr1	157291897	157292123	0#	2#[TTTCCTCA:88:0.8667187803472263] [AGAGGAAT:41:0.840598909800833]	0#	228	82	17	139.19	27.13	0.04	+	NM_005531	DE	DownStream Enhancer	157246305	45674	IFI16	3428	protein-coding
chr1	157304583	157305115	0#	3#[CTTCCTCT:52:1.0000000000000002] [CTTCCTCA:73:0.9757128198920624] [CTTCCTGT:114:0.8896519339525494]	0#	534	332	40	286.81	26.58	0.04	-	NM_004833	Body	Gene Body	157313271	-8356	AIM2	9447	protein-coding
chr1	157324395	157324853	0#	3#[AGAGGAAG:132:1.0] [AGAGGAAG:348:1.0] [CTTCCTGA:290:0.8653647538446115]	0#	460	162	130	1193.59	73.36	0	-	NM_004833	UE	Upstream Enhancer	157313271	11286	AIM2	9447	protein-coding
chr1	157398985	157399319	0#	1#[TGAGGAAG:91:0.9757128198920622]	1#[AGGTCA:325:1.0]	336	134	62	534.92	43.95	0	+	NM_021189	UE	Upstream Enhancer	157408000	-8881	CADM3	57863	protein-coding
chr1	157551835	157552130	1#[GAAAGGGGAAGTG:164:0.9435533588315553]	1#[TGGGGAAC:154:0.8532738713905553]	0#	297	183	35	388.97	74.24	0.03	-	NM_001004467	PP	Proximal Promoter	157551073	945	OR10J3	441911	protein-coding
chr1	157900749	157900989	0#	1#[TGAGGAAG:109:0.9757128198920622]	0#	242	118	18	121.89	19.7	0.07	-	NM_000567	DE	DownStream Enhancer	157951003	-50136	CRP	1401	protein-coding
chr1	158057528	158057910	1#[TACTTCCCCTTTT:225:0.8211089586748271]	0#	0#	384	221	26	190.36	38.12	0.04	+	NM_020125	UE	Upstream Enhancer	158063102	-5353	SLAMF8	56833	protein-coding
chr1	158065666	158065991	0#	2#[GTTCCCCT:140:0.8775610514984932] [ATTCCTCT:254:0.840598909800833]	0#	327	184	24	127.9	19.03	0.07	+	NM_020125	Body	Gene Body	158063102	2748	SLAMF8	56833	protein-coding
chr1	158116839	158117257	0#	2#[CTTCCACT:37:0.8808814310639483] [CTTCTTCT:132:0.8392187832339122]	0#	420	189	36	269.13	38.25	0.04	-	NM_012337	Body	Gene Body	158136530	-19502	CCDC19	25790	protein-coding
chr1	158126137	158126773	0#	3#[GGAGGAAG:325:0.9250330832242935] [TCAGGAAG:248:0.8653647538446115] [AGGGGAAA:622:0.8406605293598248]	1#[TGGTCA:354:0.8180826906887997]	638	410	67	322.48	23.26	0.02	-	NM_012337	Body	Gene Body	158136530	-9983	CCDC19	25790	protein-coding
chr1	158146715	158147225	0#	4#[CTTCCCCT:224:0.9496545689046608] [CTTCCCCA:52:0.925367388796723] [GTTCCCCT:327:0.8775610514984932] [GGGGGAAG:491:0.8746876521289542]	3#[AGGTCA:467:1.0] [TGACCA:41:0.8180826906887997] [TGACCA:238:0.8180826906887997]	512	303	71	351.65	19.48	0.03	-	NM_012337	UE	Upstream Enhancer	158136530	10488	CCDC19	25790	protein-coding
chr1	158172206	158172562	0#	2#[CTTCCCCA:134:0.925367388796723] [CTTCCTGA:34:0.8653647538446115]	0#	358	110	53	441.66	41.86	0.03	-	NM_020789	Body	Gene Body	158182010	-9694	IGSF9	57549	protein-coding
chr1	158172750	158173146	0#	3#[TGAGGAAG:197:0.9757128198920622] [TTTCCCCT:210:0.8406605293598248] [CTTCTTCT:299:0.8392187832339122]	1#[AGGTCA:5:1.0]	398	226	29	143.45	14.81	0.04	-	NM_020789	Body	Gene Body	158182010	-9034	IGSF9	57549	protein-coding
chr1	158340938	158341287	0#	4#[CTTCCTCT:223:1.0000000000000002] [TGAGGAAG:177:0.9757128198920622] [GTTCCTCT:267:0.9279064825938323] [GTTCCTCC:320:0.8529395658181256]	1#[TGGTCA:235:0.8180826906887997]	351	215	23	111.58	17.65	0.1	-	NM_052868	UE	Upstream Enhancer	158335063	6090	IGSF8	93185	protein-coding
chr1	158370956	158371894	0#	4#[AGGGGAAG:486:0.9496545689046608] [GTTCCTCA:214:0.9036193024858946] [GGGGGAAG:447:0.8746876521289542] [CTTCCTGA:286:0.8653647538446115]	2#[TGACCT:633:1.0] [GGGTCA:569:0.8857896050338628]	940	489	104	445.96	26.74	0.03	+	NM_000702	Body	Gene Body	158352143	19302	ATP1A2	477	protein-coding
chr1	158380088	158380586	0#	3#[CTTCCTCA:150:0.9757128198920624] [AGGGGAAG:96:0.9496545689046608] [GGGGGAAG:298:0.8746876521289542]	0#	500	249	141	1873.95	166.67	0	+	NM_000702	DE	DownStream Enhancer	158352143	28194	ATP1A2	477	protein-coding
chr1	158391156	158391629	0#	1#[GTTCCTCT:254:0.9279064825938323]	2#[TGACCT:179:1.0] [GGGTCA:385:0.8857896050338628]	475	243	50	443.74	55.23	0.03	+	NM_144699	Body	Gene Body	158387975	3424	ATP1A4	480	protein-coding
chr1	158405901	158406379	0#	3#[CTTCCTCT:14:1.0000000000000002] [AGAGGAAC:217:0.9279064825938323] [AGAGGAAA:260:0.8910059604551641]	0#	480	129	40	186.17	11.96	0.04	+	NM_144699	Body	Gene Body	158387975	18055	ATP1A4	480	protein-coding
chr1	158440834	158441307	0#	3#[AGGGGAAG:235:0.9496545689046608] [TTTCCTCT:182:0.8910059604551641] [GGGGGAAG:383:0.8746876521289542]	1#[GGGTCA:81:0.8857896050338628]	475	239	44	204.48	21.08	0.03	+	NM_003768	PP	Proximal Promoter	158441748	-675	PEA15	8682	protein-coding
chr1	158442909	158443583	0#	4#[CTTCCTCA:443:0.9757128198920624] [GGAGGAAG:205:0.9250330832242935] [AGAGGAAA:75:0.8910059604551641] [AGAGGAAT:134:0.840598909800833]	2#[GGGTCA:494:0.8857896050338628] [TGGTCA:226:0.8180826906887997]	676	441	54	231.11	18.08	0.03	+	NM_003768	Body	Gene Body	158441748	1602	PEA15	8682	protein-coding
chr1	158579596	158580206	0#	2#[CTTCCGCT:192:0.9370344629705614] [AGGGGAAC:334:0.8775610514984932]	2#[TGACCC:244:0.8857896050338628] [TGACCC:544:0.8857896050338628]	612	188	36	111.94	13.81	0.1	+	NM_015331	PP	Proximal Promoter	158579686	98	NCSTN	23385	protein-coding
chr1	158583361	158583742	1#[CACTTCCTCATTA:227:0.8939216197606191]	0#	0#	383	222	61	589.62	67.47	0	+	NM_015331	Body	Gene Body	158579686	3897	NCSTN	23385	protein-coding
chr1	158528159	158528613	1#[GAATGTGGAAGTG:221:0.8302893806277314]	0#	2#[AGGTCA:201:1.0] [AGGTCA:397:1.0]	456	222	49	252.76	28.34	0.03	-	NM_001098398	Body	Gene Body	158579978	-51597	COPA	1314	protein-coding
chr1	158611764	158612369	0#	3#[CTTCCTCT:350:1.0000000000000002] [CTTCCTCA:280:0.9757128198920624] [AGTGGAAG:543:0.8808814310639483]	2#[TGACCT:430:1.0] [TGACCC:2:0.8857896050338628]	607	281	99	537.98	30.66	0	+	NM_005598	DE	DownStream Enhancer	158603484	8561	NHLH1	4807	protein-coding
chr1	158759443	158759784	0#	2#[CTTCCCCT:250:0.9496545689046608] [CTTCCCCT:284:0.9496545689046608]	0#	343	262	21	152.57	23.93	0.03	-	NM_001184715	PP	Proximal Promoter	158759676	29	SLAMF6	114836	protein-coding
chr1	158776265	158777029	1#[AATAGAGGAAGTG:483:0.8281566828903975]	3#[TTTCCTCT:743:0.8910059604551641] [CTTCCCCC:103:0.874687652128954] [GGAGGAAC:87:0.8529395658181258]	0#	766	494	177	1482.11	75.19	0	-	NM_001184879	DE	DownStream Enhancer	158815930	-39171	CD84	8832	protein-coding
chr1	158811385	158811901	0#	4#[CTTCCTCT:167:1.0000000000000002] [AGGGGAAG:328:0.9496545689046608] [TGGGGAAG:64:0.925367388796723] [TTTCCCCT:454:0.8406605293598248]	1#[TGACCA:251:0.8180826906887997]	518	356	44	289.66	24.55	0.04	-	NM_001184879	Body	Gene Body	158815930	-4189	CD84	8832	protein-coding
chr1	158815722	158816061	0#	1#[CTTCCTCC:201:0.9250330832242935]	1#[GGGTCA:70:0.8857896050338628]	341	206	26	188.33	29.9	0.04	-	NM_001184879	PP	Proximal Promoter	158815930	-2	CD84	8832	protein-coding
chr1	158816628	158816959	0#	1#[AGAGGAAG:143:1.0]	0#	333	183	62	772.36	104.65	0	-	NM_001184879	PP	Proximal Promoter	158815930	881	CD84	8832	protein-coding
chr1	158843540	158843819	0#	0#	1#[TGGTCA:271:0.8180826906887997]	281	134	47	406.81	42.48	0.03	-	NM_003037	DE	DownStream Enhancer	158883705	-40031	SLAMF1	6504	protein-coding
chr1	158877753	158878197	0#	3#[AGAGGAAG:175:1.0] [CTTCCCCA:18:0.925367388796723] [TCAGGAAG:261:0.8653647538446115]	0#	446	221	36	272.5	49.83	0.04	-	NM_003037	Body	Gene Body	158883705	-5731	SLAMF1	6504	protein-coding
chr1	158899401	158899682	0#	2#[TGAGGAAC:138:0.9036193024858946] [GTTCCTCC:100:0.8529395658181256]	1#[GGGTCA:229:0.8857896050338628]	283	132	19	128.3	25.14	0.07	-	NM_003037	UE	Upstream Enhancer	158883705	15828	SLAMF1	6504	protein-coding
chr1	158901986	158902621	0#	2#[CTTCCTGT:129:0.8896519339525494] [TCAGGAAG:438:0.8653647538446115]	2#[AGGTCA:353:1.0] [GGGTCA:15:0.8857896050338628]	637	137	51	230.62	17.44	0.03	-	NM_003037	UE	Upstream Enhancer	158883705	18418	SLAMF1	6504	protein-coding
chr1	158940681	158941056	0#	2#[AGGGGAAG:93:0.9496545689046608] [TGTGGAAG:344:0.8565942509560106]	0#	377	165	38	358.24	43.6	0.03	-	NM_001778	Body	Gene Body	158948265	-7419	CD48	962	protein-coding
chr1	158975520	158975886	0#	3#[TGGGGAAG:125:0.925367388796723] [CTTCCACT:270:0.8808814310639483] [GTTCCCCA:203:0.8532738713905553]	1#[TGACCC:96:0.8857896050338628]	368	168	45	253.88	21.4	0.03	+	NM_021181	PP	Proximal Promoter	158975700	-12	SLAMF7	57823	protein-coding
chr1	159025743	159026908	1#[CAGTTCCTGTTTT:590:0.839544079222854]	2#[CTTCCTCA:944:0.9757128198920624] [GGAGGAAG:5:0.9250330832242935]	4#[TGACCT:269:1.0] [GGGTCA:240:0.8857896050338628] [GGGTCA:781:0.8857896050338628] [GGGTCA:1126:0.8857896050338628]	1167	593	93	366.95	25.44	0.03	+	NM_001261457	UE	Upstream Enhancer	159032487	-6151	LY9	4063	protein-coding
chr1	159050666	159050952	0#	2#[AGAGGAAG:59:1.0] [GGAGGAAC:185:0.8529395658181258]	2#[TGACCC:159:0.8857896050338628] [TGGTCA:8:0.8180826906887997]	288	80	17	111.53	18.27	0.1	+	NM_001261457	Body	Gene Body	159032487	18259	LY9	4063	protein-coding
chr1	159073938	159074489	0#	2#[CTTCCGCC:177:0.8620675461948546] [TTTCCCCT:243:0.8406605293598248]	1#[TGGTCA:530:0.8180826906887997]	553	188	112	837.12	43.58	0	-	NM_001166664	Body	Gene Body	159099316	-25190	CD244	51744	protein-coding
chr1	159098342	159099538	0#	3#[CTTCCTCA:105:0.9757128198920624] [TTTCCTCA:881:0.8667187803472263] [CTTCTTCT:122:0.8392187832339122]	1#[TGACCA:731:0.8180826906887997]	1198	874	92	230.82	13.93	0.03	-	NM_001166664	PP	Proximal Promoter	159099316	-100	CD244	51744	protein-coding
chr1	159104550	159104904	0#	3#[CTTCCCCT:166:0.9496545689046608] [GTTCCTCT:154:0.9279064825938323] [CTTCCTGT:137:0.8896519339525494]	1#[TGACCT:188:1.0]	356	154	30	151.54	18.21	0.04	-	NM_001166664	UE	Upstream Enhancer	159099316	5388	CD244	51744	protein-coding
chr1	159127291	159127551	1#[AAAAGAGGAAGTC:141:0.8913317838010807]	0#	0#	262	112	32	364.02	48.64	0.03	-	NM_017625	UE	Upstream Enhancer	159121584	5819	ITLN1	55600	protein-coding
chr1	159185486	159185861	0#	2#[CTTCCTCT:234:1.0000000000000002] [CTTCCTCT:262:1.0000000000000002]	0#	377	261	25	171.97	24.3	0.03	-	NM_080878	Body	Gene Body	159191213	-5466	ITLN2	142683	protein-coding
chr1	159249863	159250632	0#	4#[AGAGGAAG:184:1.0] [CTTCCTCC:484:0.9250330832242935] [CTTCCACT:12:0.8808814310639483] [TTTCCCCT:25:0.8406605293598248]	1#[AGGTCA:700:1.0]	771	486	75	263.57	18.98	0.04	-	NM_016946	Body	Gene Body	159257757	-7408	F11R	50848	protein-coding
chr1	159255511	159255884	0#	1#[AGGGGAAA:30:0.8406605293598248]	0#	375	220	24	124.01	18.6	0.07	-	NM_016946	Body	Gene Body	159257757	-2026	F11R	50848	protein-coding
chr1	159257532	159258076	0#	2#[GGAGGAAG:374:0.9250330832242935] [CTTCCTGA:319:0.8653647538446115]	0#	546	364	43	125.96	11.11	0.07	-	NM_016946	PP	Proximal Promoter	159257757	139	F11R	50848	protein-coding
chr1	159281298	159281779	1#[GAAAAAGGAACTG:93:0.8251470450548926]	3#[AGGGGAAG:157:0.9496545689046608] [AGGGGAAG:249:0.9496545689046608] [AGAGGAAA:212:0.8910059604551641]	1#[GGGTCA:343:0.8857896050338628]	483	174	105	826.85	44.33	0	-	NM_207005	PP	Proximal Promoter	159282381	-909	USF1	7391	protein-coding
chr1	159282005	159282665	0#	4#[CTTCCGCT:437:0.9370344629705614] [TGGGGAAG:80:0.925367388796723] [CTTCCTCC:159:0.9250330832242935] [GGCGGAAG:384:0.8620675461948546]	0#	662	399	51	167	13.46	0.03	-	NM_207005	PP	Proximal Promoter	159282381	23	USF1	7391	protein-coding
chr1	159304606	159305236	1#[CAAAGAGGAAATG:344:0.8352532616887316]	2#[AGAGGAAG:119:1.0] [AGGGGAAG:230:0.9496545689046608]	0#	632	274	62	208.73	12.74	0.04	-	NM_181720	Body	Gene Body	159306384	-1504	ARHGAP30	257106	protein-coding
chr1	159306083	159306638	0#	2#[AGAGGAAG:158:1.0] [CTTCCTGT:280:0.8896519339525494]	2#[TGGTCA:372:0.8180826906887997] [TGACCA:434:0.8180826906887997]	557	301	73	395.58	22.67	0.03	-	NM_181720	PP	Proximal Promoter	159306384	0	ARHGAP30	257106	protein-coding
chr1	159316370	159316811	1#[GAGAGAGGAAGTG:209:0.8159749523179656]	1#[TGAGGAAA:191:0.8667187803472263]	1#[TGACCG:79:0.8490319803691448]	443	223	55	386.73	45.9	0.03	-	NM_030916	Body	Gene Body	159326009	-9416	PVRL4	81607	protein-coding
chr1	159358221	159358615	1#[CACTTCCACTTTC:189:0.8890613356729087]	2#[AGGGGAAG:145:0.9496545689046608] [GTTCCTCA:364:0.9036193024858946]	1#[AGGTCA:337:1.0]	396	160	27	125.18	16.47	0.07	+	NM_001185092	Body	Gene Body	159354485	3896	NIT1	4817	protein-coding
chr1	159390074	159390785	1#[CACTTCCGCGTTT:305:0.8148809181507995]	1#[TGTGGAAG:536:0.8565942509560106]	0#	713	324	85	402.19	26.65	0.03	+	NM_016406	PP	Proximal Promoter	159390157	241	UFC1	51506	protein-coding
chr1	159421666	159422694	1#[CATTTCCTCTTTT:808:0.8772372634060817]	8#[TGGGGAAG:158:0.925367388796723] [TGGGGAAG:301:0.925367388796723] [CTTCCTCC:88:0.9250330832242935] [CTTCCTCC:380:0.9250330832242935] [CTTCCTCC:677:0.9250330832242935] [TTTCCTCT:596:0.8910059604551641] [CTTCCTGT:864:0.8896519339525494] [GTTCCTCC:885:0.8529395658181256]	2#[TGACCC:197:0.8857896050338628] [TGACCA:399:0.8180826906887997]	1030	817	75	329	23.26	0.02	-	NM_001199874	UE	Upstream Enhancer	159414382	8101	B4GALT3	8703	protein-coding
chr1	159428864	159429248	0#	0#	0#	386	172	43	296.21	35.94	0.04	-	NM_005099	Body	Gene Body	159435469	-6433	ADAMTS4	9507	protein-coding
chr1	159446213	159446670	0#	1#[CTTCCCCA:149:0.925367388796723]	0#	459	282	41	186.57	13.08	0.04	+	NM_004550	Body	Gene Body	159435728	10767	NDUFS2	4720	protein-coding
chr1	159437417	159438262	0#	2#[TGGGGAAG:368:0.925367388796723] [TTTCCCCT:253:0.8406605293598248]	4#[AGGTCA:225:1.0] [GGGTCA:578:0.8857896050338628] [GGGTCA:697:0.8857896050338628] [TGGTCA:171:0.8180826906887997]	847	610	73	328.13	17.83	0.02	+	NM_001166159	PP	Proximal Promoter	159438560	-533	NDUFS2	4720	protein-coding
chr1	159450808	159451120	1#[CATTTCCTCTTTC:170:0.8610192750300423]	0#	0#	314	179	21	117.97	20.69	0.08	+	NM_001166159	DE	DownStream Enhancer	159438560	12427	NDUFS2	4720	protein-coding
chr1	159451483	159451883	0#	2#[AGGGGAAG:133:0.9496545689046608] [GGGGGAAG:153:0.8746876521289542]	2#[TGGTCA:44:0.8180826906887997] [TGGTCA:186:0.8180826906887997]	402	173	37	163.08	16.03	0.03	+	NM_004106	PP	Proximal Promoter	159451710	-54	FCER1G	2207	protein-coding
chr1	159463755	159464791	1#[CACTTCCTCTTTC:429:0.9837820116239607]	4#[GGAGGAAG:67:0.9250330832242935] [TGAGGAAC:650:0.9036193024858946] [CTTCCACA:286:0.8565942509560106] [GTTCCCCA:297:0.8532738713905553]	4#[TGACCT:629:1.0] [GGGTCA:29:0.8857896050338628] [TGACCC:613:0.8857896050338628] [TGACCA:398:0.8180826906887997]	1038	423	237	1963.59	88.37	0	+	NR_049819	PP	Proximal Promoter	159463599	579	MIR5187	100847090	miscRNA
chr1	159478095	159478548	0#	1#[CTTCCTCT:209:1.0000000000000002]	2#[GGGTCA:42:0.8857896050338628] [GGGTCA:423:0.8857896050338628]	455	213	24	115.89	14.21	0.08	-	NM_005122	UE	Upstream Enhancer	159474624	3684	NR1I3	9970	protein-coding
chr1	159523990	159524444	0#	2#[CTTCCTCT:283:1.0000000000000002] [CTTCTTCT:22:0.8392187832339122]	0#	456	285	58	269.72	19.09	0.04	+	NM_001102566	DE	DownStream Enhancer	159495140	29135	PCP4L1	654790	protein-coding
chr1	159534500	159534994	1#[GAAAGAGGAAGTG:198:0.9837820116239603]	0#	1#[TGACCA:255:0.8180826906887997]	496	222	67	596.46	72.09	0	-	NM_000530	DE	DownStream Enhancer	159546386	-11664	MPZ	4359	protein-coding
chr1	159542259	159542897	0#	3#[CTTCCTCT:386:1.0000000000000002] [TTTCCCCT:305:0.8406605293598248] [CTTCTTCT:70:0.8392187832339122]	0#	640	388	77	353.09	16.6	0.03	-	NM_000530	Body	Gene Body	159546386	-3739	MPZ	4359	protein-coding
chr1	159543652	159544121	0#	1#[AGAGGAAG:240:1.0]	2#[AGGTCA:280:1.0] [GGGTCA:112:0.8857896050338628]	471	244	44	159.8	15.88	0.03	-	NM_000530	Body	Gene Body	159546386	-2490	MPZ	4359	protein-coding
chr1	159550690	159550976	0#	0#	0#	288	110	28	214.01	31.98	0.04	+	NM_001035513	PP	Proximal Promoter	159550789	11	SDHC	6391	protein-coding
chr1	159640230	159640861	1#[AAAGAAGGAAGTG:406:0.8458070606165926]	1#[GGGGGAAG:182:0.8746876521289542]	1#[AGGTCA:270:1.0]	633	416	54	428.42	47.84	0.03	-	NM_001013625	UE	Upstream Enhancer	159604288	36358	C1orf192	257177	protein-coding
chr1	159709043	159709512	0#	1#[GTTCCTCT:285:0.9279064825938323]	2#[AGGTCA:215:1.0] [GGGTCA:198:0.8857896050338628]	471	283	47	243.49	22.69	0.03	+	NM_001136219	UE	Upstream Enhancer	159741828	-32502	FCGR2A	2212	protein-coding
chr1	159709827	159710272	0#	3#[CTTCCTCT:251:1.0000000000000002] [CTTCCGCT:50:0.9370344629705614] [AGAGGAAA:94:0.8910059604551641]	2#[TGACCC:137:0.8857896050338628] [TGACCC:212:0.8857896050338628]	447	222	40	210.06	19.06	0.04	+	NM_001136219	UE	Upstream Enhancer	159741828	-31779	FCGR2A	2212	protein-coding
chr1	159727879	159728364	1#[CAGTTCCCCTTTC:212:0.85822169781568]	1#[CTTCTTCT:200:0.8392187832339122]	1#[TGGTCA:288:0.8180826906887997]	487	168	44	300.8	34.88	0.03	+	NM_001136219	UE	Upstream Enhancer	159741828	-13781	FCGR2A	2212	protein-coding
chr1	159741641	159742132	0#	1#[CTTCCTCT:184:1.0000000000000002]	2#[AGGTCA:485:1.0] [GGGTCA:334:0.8857896050338628]	493	183	49	213.51	20.38	0.04	+	NM_001136219	PP	Proximal Promoter	159741828	-4	FCGR2A	2212	protein-coding
chr1	159776622	159776943	0#	0#	0#	323	82	20	142.14	22.53	0.04	-	NM_001127596	DE	DownStream Enhancer	159787037	-10333	FCGR3A	2214	protein-coding
chr1	159879181	159879336	0#	2#[GGAGGAAG:25:0.9250330832242935] [TTTCCTCA:100:0.8667187803472263]	2#[GGGTCA:63:0.8857896050338628] [TGGTCA:18:0.8180826906887997]	157	78	18	193.3	32.86	0.04	-	NM_001244753	UE	Upstream Enhancer	159867876	11383	FCGR3B	2215	protein-coding
chr1	159881417	159881560	1#[CATTTCCTCTTTC:61:0.8610192750300423]	0#	0#	145	72	18	212	30.35	0.04	-	NM_001244753	UE	Upstream Enhancer	159867876	13613	FCGR3B	2215	protein-coding
chr1	159958314	159958789	0#	5#[CTTCCTCA:350:0.9757128198920624] [GGAGGAAG:4:0.9250330832242935] [GGAGGAAG:132:0.9250330832242935] [TCAGGAAG:124:0.8653647538446115] [TGGGGAAC:169:0.8532738713905553]	2#[TGACCT:272:1.0] [GGGTCA:438:0.8857896050338628]	477	211	45	151.32	12.61	0.04	+	NM_001002901	PP	Proximal Promoter	159959080	-555	FCRLB	127943	protein-coding
chr1	160239356	160240834	1#[CACTTCCCCTTTC:952:0.9435533588315557]	4#[AGGGGAAG:1031:0.9496545689046608] [TGGGGAAG:7:0.925367388796723] [TGGGGAAG:981:0.925367388796723] [TGAGGAAA:43:0.8667187803472263]	3#[AGGTCA:135:1.0] [GGGTCA:261:0.8857896050338628] [TGACCA:203:0.8180826906887997]	1480	961	234	1590.66	88.39	0	-	NM_015441	Body	Gene Body	160260268	-19951	OLFML2B	25903	protein-coding
chr1	160450716	160451027	1#[AAAGGGGGAAGTG:115:0.8788817133773799]	0#	0#	313	133	43	236.06	18.8	0.03	+	NM_001164757	Body	Gene Body	160306204	144645	NOS1AP	9722	protein-coding
chr1	160606202	160606594	0#	1#[CTTCCTCT:207:1.0000000000000002]	0#	394	209	21	126.22	21.91	0.07	+	NM_001164757	Body	Gene Body	160306204	300207	NOS1AP	9722	protein-coding
chr1	160659456	160659849	1#[AAAAGAGGAAGTT:139:0.8485040319692513]	1#[AGCGGAAC:115:0.8649409455643936]	3#[AGGTCA:80:1.0] [TGACCC:371:0.8857896050338628] [TGGTCA:153:0.8180826906887997]	395	129	55	439.97	27.56	0.03	-	NM_053282	UE	Upstream Enhancer	160648552	11033	SH2D1B	117157	protein-coding
chr1	161090679	161090987	0#	1#[AGAGGAAA:179:0.8910059604551641]	0#	310	183	37	411.08	79.36	0.03	-	NM_178550	Body	Gene Body	161105229	-14367	C1orf110	339512	protein-coding
chr1	162896289	162896591	0#	0#	1#[AGGTCA:185:1.0]	304	179	26	200.72	33.22	0.04	+	NM_002585	Body	Gene Body	162795220	101248	PBX1	5087	protein-coding
chr1	162952805	162953135	0#	0#	1#[TGGTCA:129:0.8180826906887997]	332	212	24	145.13	20.59	0.04	+	NM_002585	Body	Gene Body	162795220	157797	PBX1	5087	protein-coding
chr1	163523978	163524147	0#	1#[TGAGGAAG:99:0.9757128198920622]	0#	171	85	14	113.96	23.26	0.1	-	NM_001174069	Body	Gene Body	163592102	-68039	LMX1A	4009	protein-coding
chr1	163628865	163629215	0#	1#[GTTCCTCT:187:0.9279064825938323]	1#[TGGTCA:217:0.8180826906887997]	352	196	35	267.52	36.84	0.04	-	NM_006917	DE	DownStream Enhancer	163681216	-52155	RXRG	6258	protein-coding
chr1	163706016	163706367	0#	3#[CTTCCTCT:134:1.0000000000000002] [TGAGGAAA:286:0.8667187803472263] [CTTCCTGA:251:0.8653647538446115]	1#[AGGTCA:91:1.0]	353	135	22	157.96	29.07	0.03	-	NR_026744	DE	DownStream Enhancer	163817965	-111814	LOC400794	400794	miscRNA
chr1	163763148	163763572	2#[CAAAGGGGAAGTG:101:0.9177873454902451] [AAATGAGGAATTG:252:0.8067895486491559]	2#[ACAGGAAG:352:0.8896519339525494] [CTTCCTGA:415:0.8653647538446115]	0#	426	139	27	120.03	13.87	0.08	-	NR_026744	Body	Gene Body	163817965	-54678	LOC400794	400794	miscRNA
chr1	163833833	163834401	0#	2#[CTTCCCCC:50:0.874687652128954] [TTTCCCCT:428:0.8406605293598248]	1#[TGGTCA:366:0.8180826906887997]	570	287	59	329.22	24.85	0.02	-	NR_026744	UE	Upstream Enhancer	163817965	16155	LOC400794	400794	miscRNA
chr1	163934494	163934790	0#	1#[ATTCCTCT:38:0.840598909800833]	0#	298	146	32	201.04	19.68	0.04	+	NR_036683	PP	Proximal Promoter	163934610	30	LOC440700	440700	pseudo
chr1	164004451	164004925	0#	4#[CTTCCGCT:297:0.9370344629705614] [CTTCCTCC:45:0.9250330832242935] [AGAGGAAA:362:0.8910059604551641] [TTTCCCCT:13:0.8406605293598248]	0#	476	295	44	159.8	11.62	0.03	-	NM_001256165	PP	Proximal Promoter	164004783	-37	TMCO1	54499	protein-coding
chr1	164004959	164005373	0#	3#[CTTCCGCA:118:0.9127472828626235] [AGTGGAAG:402:0.8808814310639483] [AGAAGAAG:319:0.839218783233912]	1#[TGGTCA:314:0.8180826906887997]	416	135	50	236	19.77	0.03	-	NM_001256165	PP	Proximal Promoter	164004783	311	TMCO1	54499	protein-coding
chr1	164078614	164078989	0#	2#[CTTCCCCT:274:0.9496545689046608] [CTTCCTGT:92:0.8896519339525494]	1#[TGGTCA:232:0.8180826906887997]	377	298	21	117.97	14.61	0.08	+	NM_012474	Body	Gene Body	164063355	15557	UCK2	7371	protein-coding
chr1	164092762	164093771	0#	3#[AGAGGAAG:270:1.0] [CTTCCCCT:865:0.9496545689046608] [CTTCCCCA:281:0.925367388796723]	1#[TGACCT:181:1.0]	1011	296	120	720.38	56.26	0	+	NM_012474	Body	Gene Body	164063355	29703	UCK2	7371	protein-coding
chr1	164107173	164107511	0#	2#[TTTCCTCT:213:0.8910059604551641] [ACAGGAAG:176:0.8896519339525494]	0#	340	181	40	148.77	11.86	0.03	+	NM_012474	Body	Gene Body	164063355	43999	UCK2	7371	protein-coding
chr1	164119023	164119381	0#	2#[TGAGGAAC:128:0.9036193024858946] [ACAGGAAG:88:0.8896519339525494]	0#	360	126	20	135.78	25.19	0.05	+	NM_012474	Body	Gene Body	164063355	55794	UCK2	7371	protein-coding
chr1	165065229	165065434	0#	1#[CTTCCTCA:121:0.9757128198920624]	0#	207	83	16	153.91	28.16	0.03	+	NM_017542	UE	Upstream Enhancer	165075347	-10035	POGK	57645	protein-coding
chr1	165326283	165326967	1#[AAAACAGGAAGTC:402:0.8162075240398106]	1#[GTTCCCCT:128:0.8775610514984932]	2#[TGACCA:490:0.8180826906887997] [TGGTCA:574:0.8180826906887997]	686	416	50	348.13	38.76	0.03	-	NM_005814	PP	Proximal Promoter	165326492	207	GPA33	10223	protein-coding
chr1	165332437	165332776	0#	1#[AGAGGAAA:162:0.8910059604551641]	2#[AGGTCA:106:1.0] [TGGTCA:61:0.8180826906887997]	341	177	23	110.05	16.85	0.1	+	NM_001080426	Body	Gene Body	165330710	1904	DUSP27	92235	protein-coding
chr1	165344859	165345269	1#[CAAACAGGAAGTG:188:0.8828917385213799]	1#[TGGGGAAG:89:0.925367388796723]	0#	412	210	44	441.78	76.74	0.03	+	NM_001080426	Body	Gene Body	165330710	14359	DUSP27	92235	protein-coding
chr1	165411751	165412154	0#	0#	0#	405	186	35	223.73	17.44	0.03	+	NM_002697	UE	Upstream Enhancer	165456689	-44752	POU2F1	5451	protein-coding
chr1	165499917	165500222	0#	1#[AGAGGAAA:195:0.8910059604551641]	0#	307	235	16	126.67	17.92	0.06	+	NM_002697	Body	Gene Body	165456689	43463	POU2F1	5451	protein-coding
chr1	165528843	165529223	1#[AAAAGAGGAAGTC:218:0.8913317838010807]	0#	1#[TGACCA:351:0.8180826906887997]	382	232	55	595.64	86.13	0	+	NM_002697	Body	Gene Body	165456689	72386	POU2F1	5451	protein-coding
chr1	165533089	165533377	0#	0#	0#	290	175	30	264.34	41.53	0.04	+	NM_002697	Body	Gene Body	165456689	76575	POU2F1	5451	protein-coding
chr1	165683442	165684178	1#[AAAACAGGAAGTC:338:0.8162075240398106]	0#	1#[TGACCA:444:0.8180826906887997]	738	309	86	427.73	23.26	0.03	-	NM_000734	Body	Gene Body	165754471	-70720	CD247	919	protein-coding
chr1	165837136	165837684	0#	3#[CTTCCTCT:499:1.0000000000000002] [CTTCCCCA:309:0.925367388796723] [CTTCCTGA:526:0.8653647538446115]	3#[TGACCT:266:1.0] [TGACCC:193:0.8857896050338628] [GGGTCA:359:0.8857896050338628]	550	309	115	863.54	43.09	0	+	NM_052862	UE	Upstream Enhancer	165866097	-28652	RCSD1	92241	protein-coding
chr1	165848525	165848800	1#[CAATTCCTCTTTT:125:0.865561503694333]	1#[CTTCCCCA:142:0.925367388796723]	0#	277	191	16	113.7	17.16	0.1	+	NM_052862	UE	Upstream Enhancer	165866097	-17381	RCSD1	92241	protein-coding
chr1	165853060	165853921	0#	2#[TGAGGAAA:86:0.8667187803472263] [CTTCCTGA:581:0.8653647538446115]	3#[TGACCT:278:1.0] [GGGTCA:833:0.8857896050338628] [TGGTCA:598:0.8180826906887997]	863	256	77	402.57	20.98	0.03	+	NM_052862	UE	Upstream Enhancer	165866097	-12781	RCSD1	92241	protein-coding
chr1	165863511	165863792	0#	3#[AGGGGAAG:80:0.9496545689046608] [CTTCCCCT:178:0.9496545689046608] [AGGGGAAC:146:0.8775610514984932]	1#[TGACCT:33:1.0]	283	153	24	112.6	13.18	0.1	+	NM_052862	UE	Upstream Enhancer	165866097	-2433	RCSD1	92241	protein-coding
chr1	165863835	165864547	0#	2#[TTTCCTCT:285:0.8910059604551641] [CTTCCGCC:302:0.8620675461948546]	1#[TGGTCA:192:0.8180826906887997]	714	302	75	325.33	26.32	0.02	+	NM_052862	PP	Proximal Promoter	165866097	-1960	RCSD1	92241	protein-coding
chr1	165867842	165868572	0#	3#[TGAGGAAG:470:0.9757128198920622] [CTTCCTGT:520:0.8896519339525494] [CTTCCACA:439:0.8565942509560106]	1#[AGGTCA:716:1.0]	732	493	48	229.47	15.07	0.03	+	NM_052862	Body	Gene Body	165866097	2238	RCSD1	92241	protein-coding
chr1	165933685	165934011	1#[CAAAGAGGAAGTG:207:0.9580159982826502]	0#	1#[TGACCG:285:0.8490319803691448]	328	214	38	220.68	20.6	0.03	+	NM_052862	Body	Gene Body	165866097	67802	RCSD1	92241	protein-coding
chr1	166070210	166070519	0#	2#[CTTCCTCT:42:1.0000000000000002] [TGAGGAAG:200:0.9757128198920622]	1#[GGGTCA:180:0.8857896050338628]	311	230	18	140.83	23.26	0.04	-	NM_018417	Body	Gene Body	166150077	-79637	ADCY10	55811	protein-coding
chr1	166118369	166118642	1#[AAAAGGGGAACTG:57:0.874439686191719]	0#	1#[TGACCT:140:1.0]	275	76	17	145.8	35.84	0.04	-	NM_018417	Body	Gene Body	166150077	-31632	ADCY10	55811	protein-coding
chr1	166382056	166382265	0#	3#[AGAGGAAG:43:1.0] [ACAGGAAG:53:0.8896519339525494] [CGGGGAAG:10:0.8336868838942818]	0#	211	85	19	168.6	32.95	0.03	-	NM_001267612	UE	Upstream Enhancer	166372298	9843	GPR161	23432	protein-coding
chr1	166756156	166756497	0#	1#[GTTCCTCC:148:0.8529395658181256]	2#[AGGTCA:197:1.0] [TGACCA:307:0.8180826906887997]	343	166	30	214.14	29.25	0.04	-	NM_003175	DE	DownStream Enhancer	166779859	-23537	XCL2	6846	protein-coding
chr1	166756742	166757038	1#[AAAAGGGGAAGTA:152:0.8211089586748271]	0#	0#	298	198	19	128.61	24.92	0.07	-	NM_003175	DE	DownStream Enhancer	166779859	-22919	XCL2	6846	protein-coding
chr1	167296809	167297134	1#[AAAGGAGGAAGTC:131:0.8104421499708658]	2#[TGAGGAAG:154:0.9757128198920622] [CTTCCTGT:259:0.8896519339525494]	2#[AGGTCA:169:1.0] [TGACCA:54:0.8180826906887997]	327	143	24	184.99	32.32	0.04	+	NM_001677	UE	Upstream Enhancer	167342570	-45618	ATP1B1	481	protein-coding
chr1	167358018	167358340	0#	3#[CTTCCCCA:215:0.925367388796723] [CTTCCCCC:135:0.874687652128954] [TGTGGAAG:272:0.8565942509560106]	2#[TGACCC:198:0.8857896050338628] [TGACCG:44:0.8490319803691448]	324	217	28	266.97	46.08	0.04	+	NM_001677	Body	Gene Body	167342570	15665	ATP1B1	481	protein-coding
chr1	167749151	167749579	0#	4#[AGAGGAAG:171:1.0] [AGGGGAAG:125:0.9496545689046608] [GGAGGAAG:151:0.9250330832242935] [GTTCCCCA:59:0.8532738713905553]	1#[TGACCA:404:0.8180826906887997]	430	151	41	248.45	25	0.03	-	NM_000130	Body	Gene Body	167822393	-73091	F5	2153	protein-coding
chr1	167840856	167841185	0#	2#[CTTCCCCA:218:0.925367388796723] [ACAGGAAG:54:0.8896519339525494]	2#[AGGTCA:49:1.0] [AGGTCA:290:1.0]	331	94	25	154.52	21.81	0.03	-	NM_003005	Body	Gene Body	167866001	-25051	SELP	6403	protein-coding
chr1	167884652	167884939	1#[CAAAGGGGAAGTG:83:0.9177873454902451]	2#[AGAGGAAC:107:0.9279064825938323] [AGAGGAAA:156:0.8910059604551641]	0#	289	92	16	130.79	30.72	0.06	-	NM_003005	UE	Upstream Enhancer	167866001	18743	SELP	6403	protein-coding
chr1	168038673	168038903	0#	1#[AGAGGAAG:145:1.0]	1#[TGACCC:15:0.8857896050338628]	232	151	14	122.03	28.16	0.07	+	NM_018186	Body	Gene Body	168031173	7651	C1orf112	55732	protein-coding
chr1	168131804	168132250	0#	1#[CTTCCTCT:192:1.0000000000000002]	5#[TGACCC:293:0.8857896050338628] [TGACCG:229:0.8490319803691448] [TGGTCA:203:0.8180826906887997] [TGACCA:242:0.8180826906887997] [TGACCA:334:0.8180826906887997]	448	188	47	277.64	27.73	0.04	-	NM_020423	UE	Upstream Enhancer	168129724	2268	SCYL3	57147	protein-coding
chr1	168768134	168768590	0#	2#[AGAGGAAG:190:1.0] [AGCGGAAG:22:0.9370344629705611]	1#[GGGTCA:263:0.8857896050338628]	458	224	22	121.06	21.59	0.07	+	NM_001146039	PP	Proximal Promoter	168767886	472	GORAB	92344	protein-coding
chr1	168893263	168893659	1#[CACTTCCCCTTTT:205:0.959771347207595]	0#	1#[TGACCC:345:0.8857896050338628]	398	210	39	283.22	37.47	0.04	+	NM_006902	UE	Upstream Enhancer	168899936	-6463	PRRX1	5396	protein-coding
chr1	168901450	168901787	1#[GAATGAGGAAGTC:189:0.8163418403798642]	1#[GTTCCGCA:262:0.8406537654564559]	0#	339	203	16	119.94	33.28	0.08	+	NM_006902	Body	Gene Body	168899936	1717	PRRX1	5396	protein-coding
chr1	168991203	168991613	1#[AAAACAGGAAGTG:176:0.9248757402387296]	0#	0#	412	199	25	196.14	52.7	0.04	+	NM_006902	DE	DownStream Enhancer	168899936	91466	PRRX1	5396	protein-coding
chr1	169448721	169449029	1#[CACTTCCTCTTTC:192:0.9837820116239607]	1#[TTTCCTCT:174:0.8910059604551641]	1#[GGGTCA:127:0.8857896050338628]	310	196	94	802.94	46.86	0	+	NM_001460	DE	DownStream Enhancer	169421011	27906	FMO2	2327	protein-coding
chr1	169567222	169567543	0#	0#	1#[AGGTCA:197:1.0]	323	95	41	385.05	54.82	0.03	+	NM_002022	Body	Gene Body	169550109	17208	FMO4	2329	protein-coding
chr1	169721936	169722230	0#	2#[CTTCCGCT:126:0.9370344629705614] [CTTCCTGT:20:0.8896519339525494]	0#	296	148	31	255.81	34.88	0.04	+	NM_015172	PP	Proximal Promoter	169721289	795	PRRC2C	23215	protein-coding
chr1	169846204	169846530	0#	1#[AGAGGAAG:128:1.0]	0#	328	143	47	243.49	20.7	0.03	+	NM_015172	DE	DownStream Enhancer	169721289	125058	PRRC2C	23215	protein-coding
chr1	170064601	170064901	1#[AAAAGAGGAAGTG:174:0.9999999999999994]	0#	1#[TGACCA:142:0.8180826906887997]	302	189	30	316.04	56.32	0.02	+	NM_015569	UE	Upstream Enhancer	170077243	-12453	DNM3	26052	protein-coding
chr1	170359355	170359549	1#[CACTTCCCTTTTT:76:0.886468041654403]	1#[TGAGGAAA:142:0.8667187803472263]	0#	196	80	15	126.74	25.19	0.06	+	NM_015569	Body	Gene Body	170077243	282192	DNM3	26052	protein-coding
chr1	170578423	170578686	1#[CATTTCCTCTTTT:209:0.8772372634060817]	0#	0#	265	179	15	119.06	27.91	0.08	+	NM_015569	Body	Gene Body	170077243	501359	DNM3	26052	protein-coding
chr1	170683549	170683923	0#	1#[AGAGGAAA:348:0.8910059604551641]	1#[AGGTCA:116:1.0]	376	131	46	205.61	17.44	0.03	+	NM_139240	Body	Gene Body	170656450	27230	C1orf105	92346	protein-coding
chr1	170684941	170685424	0#	3#[AGAGGAAG:243:1.0] [GGAGGAAG:309:0.9250330832242935] [AGTGGAAG:220:0.8808814310639483]	0#	485	251	40	170.58	18.9	0.03	+	NM_139240	Body	Gene Body	170656450	28742	C1orf105	92346	protein-coding
chr1	170705559	170705794	0#	0#	0#	237	143	18	121.89	16.53	0.07	+	NM_139240	DE	DownStream Enhancer	170656450	49252	C1orf105	92346	protein-coding
chr1	170708399	170708771	0#	1#[AGAAGAAG:248:0.839218783233912]	0#	374	224	21	152.57	28.27	0.03	-	NM_002642	UE	Upstream Enhancer	170679853	28770	PIGC	5279	protein-coding
chr1	170767966	170768846	0#	4#[CTTCCCCA:53:0.925367388796723] [TGAGGAAC:195:0.9036193024858946] [AGAGGAAA:416:0.8910059604551641] [AGGGGAAA:609:0.8406605293598248]	1#[TGGTCA:12:0.8180826906887997]	882	634	66	234.93	17.78	0.03	+	NM_014283	PP	Proximal Promoter	170768882	-282	SUCO	51430	protein-coding
chr1	170781061	170781517	0#	0#	0#	458	212	41	335.37	51.48	0.02	+	NM_014283	Body	Gene Body	170768882	12391	SUCO	51430	protein-coding
chr1	170851965	170852343	0#	2#[GTTCCTCT:169:0.9279064825938323] [TTTCCTCT:186:0.8910059604551641]	1#[TGACCA:15:0.8180826906887997]	380	153	35	193.87	23.86	0.04	+	NM_014283	DE	DownStream Enhancer	170768882	83236	SUCO	51430	protein-coding
chr1	171573035	171573400	0#	1#[AGAGGAAA:254:0.8910059604551641]	3#[AGGTCA:131:1.0] [TGACCC:62:0.8857896050338628] [TGACCA:242:0.8180826906887997]	367	132	19	145.35	35.39	0.04	-	NR_037845	Body	Gene Body	171712917	-139750	LOC100506023	100506023	miscRNA
chr1	171645313	171645716	0#	2#[AGGGGAAG:243:0.9496545689046608] [CTTCCTGA:296:0.8653647538446115]	0#	405	248	64	732.54	116.28	0	-	NR_037845	Body	Gene Body	171712917	-67356	LOC100506023	100506023	miscRNA
chr1	171712218	171712888	0#	2#[CTTCCTCT:224:1.0000000000000002] [GTTCCTCT:504:0.9279064825938323]	4#[TGACCT:33:1.0] [AGGTCA:238:1.0] [CGGTCA:306:0.8490319803691448] [TGACCG:585:0.8490319803691448]	672	235	49	289.01	40.05	0.04	-	NR_037845	PP	Proximal Promoter	171712917	-464	LOC100506023	100506023	miscRNA
chr1	171789955	171790319	1#[CATTTCCCCTTTC:135:0.8207906222376372]	0#	0#	366	123	32	235.12	35.47	0.03	-	NM_178527	Body	Gene Body	171838856	-48778	SLC9C2	284525	protein-coding
chr1	172103757	172104447	0#	4#[CTTCCTCT:99:1.0000000000000002] [GGAGGAAG:228:0.9250330832242935] [CTTCCTCG:158:0.8840323149896212] [GGGGGAAG:280:0.8746876521289542]	2#[GGGTCA:470:0.8857896050338628] [TGACCG:184:0.8490319803691448]	692	463	41	125.63	10.9	0.07	+	NM_001122770	PP	Proximal Promoter	172104115	105	ZBTB37	84614	protein-coding
chr1	172244125	172244300	0#	3#[AGAGGAAG:65:1.0] [AGGGGAAG:82:0.9496545689046608] [GGAGGAAG:106:0.9250330832242935]	0#	177	91	13	125.92	30.72	0.07	-	NM_172071	UE	Upstream Enhancer	172228833	15383	RC3H1	149041	protein-coding
chr1	172257913	172258485	0#	2#[CTTCCTCT:214:1.0000000000000002] [CTTCCTCC:165:0.9250330832242935]	0#	574	201	59	277.66	22.03	0.04	-	NM_172071	UE	Upstream Enhancer	172228833	29281	RC3H1	149041	protein-coding
chr1	172501159	172501325	1#[GAATCAGGAAGTG:68:0.8498857968175131]	0#	0#	168	84	13	112.11	25.4	0.1	+	NM_014857	Body	Gene Body	172395174	106069	RABGAP1L	9910	protein-coding
chr1	173302837	173303230	0#	1#[AGAGGAAG:123:1.0]	1#[GGGTCA:217:0.8857896050338628]	395	198	17	119.73	17.92	0.08	+	NM_022093	PP	Proximal Promoter	173303616	-581	TNN	63923	protein-coding
chr1	173308798	173309229	0#	0#	0#	433	226	34	215.84	31.47	0.04	+	NM_022093	Body	Gene Body	173303616	5408	TNN	63923	protein-coding
chr1	173314387	173314676	0#	0#	1#[GGGTCA:119:0.8857896050338628]	291	198	35	289.41	32.66	0.04	+	NM_022093	Body	Gene Body	173303616	10969	TNN	63923	protein-coding
chr1	173363878	173364256	0#	2#[TGGGGAAG:161:0.925367388796723] [GGAGGAAG:269:0.9250330832242935]	1#[TGACCT:288:1.0]	380	233	25	121.98	13.74	0.07	+	NM_022093	Body	Gene Body	173303616	60495	TNN	63923	protein-coding
chr1	173424582	173425052	1#[TACTTCCTCTTTT:303:0.8613376114672322]	1#[CTTCCCCT:202:0.9496545689046608]	0#	472	208	46	233	23.26	0.03	-	NM_001162895	Body	Gene Body	173428572	-3782	KIAA0040	9674	protein-coding
chr1	173541730	173542040	0#	1#[CTTCCTCA:271:0.9757128198920624]	1#[AGGTCA:24:1.0]	312	177	20	142.14	21.77	0.04	-	NM_003285	DE	DownStream Enhancer	173979375	-437468	TNR	7143	protein-coding
chr1	173710589	173710994	0#	1#[AGAGGAAG:207:1.0]	1#[TGACCT:75:1.0]	407	224	26	155.55	23.26	0.03	-	NM_003285	Body	Gene Body	173979375	-268562	TNR	7143	protein-coding
chr1	173747319	173747631	1#[CAGTTCCCCTTTC:202:0.85822169781568]	1#[CTTCCCCT:215:0.9496545689046608]	1#[TGACCC:222:0.8857896050338628]	314	206	36	278.56	37.73	0.04	-	NM_003285	Body	Gene Body	173979375	-231850	TNR	7143	protein-coding
chr1	173748382	173748838	1#[CACTTCCCCTTTT:235:0.959771347207595]	2#[AGAGGAAA:27:0.8910059604551641] [TTTCCTCA:349:0.8667187803472263]	3#[AGGTCA:93:1.0] [AGGTCA:377:1.0] [GGGTCA:166:0.8857896050338628]	458	245	45	226.65	19.02	0.03	-	NM_003285	Body	Gene Body	173979375	-230748	TNR	7143	protein-coding
chr1	173836433	173837153	1#[CAGTTCCTCATTC:278:0.8396783955629078]	4#[AGAGGAAC:218:0.9279064825938323] [GGAGGAAG:39:0.9250330832242935] [TTTCCTCT:268:0.8910059604551641] [TTTCCTCT:293:0.8910059604551641]	2#[AGGTCA:113:1.0] [AGGTCA:573:1.0]	722	238	56	399.64	55.41	0.03	-	NM_003285	Body	Gene Body	173979375	-142704	TNR	7143	protein-coding
chr1	173864381	173864602	0#	1#[CTTCCTCT:109:1.0000000000000002]	0#	223	84	16	148.71	35.84	0.03	-	NM_003285	Body	Gene Body	173979375	-114910	TNR	7143	protein-coding
chr1	173865901	173866209	1#[AAAAGAGGAACTC:133:0.8060001227852049]	0#	0#	310	138	15	115.16	23.04	0.09	-	NM_003285	Body	Gene Body	173979375	-113336	TNR	7143	protein-coding
chr1	174814866	174815162	1#[AAAGGAGGAAGTG:172:0.9191103661697848]	1#[TGGGGAAC:159:0.8532738713905553]	0#	298	190	16	128.7	28.16	0.07	+	NM_020318	Body	Gene Body	174698929	116127	PAPPA2	60676	protein-coding
chr1	175340546	175340900	1#[GAGTTCCTCTTTT:165:0.8060001227852053]	4#[AGAGGAAA:34:0.8910059604551641] [TTTCCTCA:332:0.8667187803472263] [GTTCCTCC:12:0.8529395658181256] [ATTCCTCT:189:0.840598909800833]	0#	356	218	17	127.13	25.6	0.06	-	NM_207108	Body	Gene Body	175400647	-59883	ASTN1	460	protein-coding
chr1	175370313	175370700	1#[CAAAGAGGAAGTG:183:0.9580159982826502]	1#[AGAGGAAA:217:0.8910059604551641]	1#[TGACCT:349:1.0]	389	196	19	141.71	30.72	0.04	-	NM_207108	Body	Gene Body	175400647	-30138	ASTN1	460	protein-coding
chr1	175409858	175410019	1#[GAAAGAGGAACTG:54:0.8984503506080849]	0#	1#[GGGTCA:76:0.8857896050338628]	163	81	34	489.18	85.95	0	+	NM_021165	Body	Gene Body	175407255	2684	FAM5B	57795	protein-coding
chr1	176290848	176291253	0#	1#[CTTCCTGT:248:0.8896519339525494]	1#[TGACCT:185:1.0]	407	226	22	131.37	21.59	0.06	-	NR_037167	UE	Upstream Enhancer	176273765	17309	LOC730102	730102	pseudo
chr1	176291633	176292400	0#	3#[TGAGGAAC:477:0.9036193024858946] [CTTCCTGT:49:0.8896519339525494] [TGGGGAAC:624:0.8532738713905553]	3#[AGGTCA:6:1.0] [GGGTCA:706:0.8857896050338628] [CGGTCA:617:0.8490319803691448]	769	510	52	231.76	19.38	0.03	-	NR_037167	UE	Upstream Enhancer	176273765	18378	LOC730102	730102	pseudo
chr1	176302627	176303452	0#	3#[AGGGGAAG:293:0.9496545689046608] [TTTCCCCT:589:0.8406605293598248] [AGAGGAAT:505:0.840598909800833]	0#	827	289	71	441.16	31.25	0.03	+	NM_170692	UE	Upstream Enhancer	176329486	-26570	RASAL2	9462	protein-coding
chr1	176355360	176355887	0#	2#[AGAGGAAC:269:0.9279064825938323] [TTTCCTCA:234:0.8667187803472263]	0#	529	282	67	481.75	44.08	0	+	NM_170692	Body	Gene Body	176329486	26156	RASAL2	9462	protein-coding
chr1	176369795	176370271	0#	1#[CTTCCTCT:202:1.0000000000000002]	0#	478	214	38	193.23	20.38	0.04	+	NM_170692	Body	Gene Body	176329486	40523	RASAL2	9462	protein-coding
chr1	176379789	176380094	1#[CACTTCCTCTCTT:197:0.832192940694005]	0#	0#	307	173	18	121.89	24.99	0.07	+	NM_170692	Body	Gene Body	176329486	50476	RASAL2	9462	protein-coding
chr1	176381311	176381656	1#[CAAAGAGGAAGTG:247:0.9580159982826502]	1#[TTTCCTCT:146:0.8910059604551641]	0#	347	250	50	583.02	92.15	0	+	NM_170692	Body	Gene Body	176329486	52075	RASAL2	9462	protein-coding
chr1	176428399	176428754	0#	2#[AGGGGAAG:188:0.9496545689046608] [CTTCCTCC:128:0.9250330832242935]	0#	357	226	30	266.29	37.36	0.04	+	NM_170692	Body	Gene Body	176329486	99139	RASAL2	9462	protein-coding
chr1	176519233	176519504	0#	1#[AGCGGAAG:158:0.9370344629705611]	1#[TGGTCA:123:0.8180826906887997]	273	158	24	184.99	30.16	0.04	+	NM_170692	Body	Gene Body	176329486	189905	RASAL2	9462	protein-coding
chr1	176519829	176520212	0#	3#[TGAGGAAG:47:0.9757128198920622] [GGAGGAAG:231:0.9250330832242935] [CTTCCTGA:364:0.8653647538446115]	1#[AGGTCA:357:1.0]	385	277	25	196.14	29.1	0.04	+	NM_170692	Body	Gene Body	176329486	190620	RASAL2	9462	protein-coding
chr1	176573225	176573582	0#	2#[AGAGGAAG:100:1.0] [AGAAGAAG:64:0.839218783233912]	0#	359	110	22	126.84	25.05	0.06	+	NM_170692	Body	Gene Body	176329486	243849	RASAL2	9462	protein-coding
chr1	177170243	177170898	0#	1#[GGAGGAAC:169:0.8529395658181258]	1#[AGGTCA:85:1.0]	657	192	71	327.96	17.83	0.02	+	NM_152663	DE	DownStream Enhancer	176960922	209513	RALGPS2	55103	protein-coding
chr1	177259773	177260137	1#[AAAGGAGGAAGTG:120:0.9191103661697848]	0#	0#	366	140	31	245.34	41.53	0.03	+	NM_014864	PP	Proximal Promoter	177261696	-1783	FAM20B	9917	protein-coding
chr1	177262984	177263268	0#	1#[CTTCCTCA:144:0.9757128198920624]	0#	286	161	26	192.88	30.52	0.04	+	NM_014864	Body	Gene Body	177261696	1449	FAM20B	9917	protein-coding
chr1	177378590	177379021	1#[TAAAGAGGAAGTC:251:0.8440253586068771]	0#	1#[TGACCT:383:1.0]	433	260	56	246.34	16.62	0.03	-	NM_001136000	PP	Proximal Promoter	177378847	3	ABL2	27	protein-coding
chr1	177453784	177453991	1#[TACTTCCCCTTTC:139:0.804890970298788]	0#	0#	209	137	15	134.41	25.58	0.05	-	NM_007314	Body	Gene Body	177465442	-11521	ABL2	27	protein-coding
chr1	177554324	177554620	1#[GACTTCCTCTTTT:165:0.891331783801081]	0#	0#	298	158	44	277.11	22.87	0.04	+	NM_001252511	Body	Gene Body	177529471	25011	SOAT1	6646	protein-coding
chr1	177563473	177563759	0#	0#	2#[TGACCT:259:1.0] [GGGTCA:228:0.8857896050338628]	288	115	21	152.57	21.77	0.03	+	NM_001252511	Body	Gene Body	177529471	34117	SOAT1	6646	protein-coding
chr1	177601532	177602028	1#[AAAGGAGGAAGTG:198:0.9191103661697848]	1#[TGGGGAAG:345:0.925367388796723]	1#[TGACCC:451:0.8857896050338628]	498	212	111	826.02	53.4	0	+	NM_144696	PP	Proximal Promoter	177601477	267	AXDND1	126859	protein-coding
chr1	178054436	178054992	0#	0#	2#[TGACCT:481:1.0] [GGGTCA:450:0.8857896050338628]	558	208	59	277.66	19.47	0.04	+	NM_173509	DE	DownStream Enhancer	177978920	75724	FAM163A	148753	protein-coding
chr1	178055889	178056348	0#	2#[AGAGGAAG:122:1.0] [CTTCCTCA:298:0.9757128198920624]	3#[TGACCT:6:1.0] [TGGTCA:228:0.8180826906887997] [TGGTCA:336:0.8180826906887997]	461	304	81	449.31	22.75	0.02	+	NM_173509	DE	DownStream Enhancer	177978920	77273	FAM163A	148753	protein-coding
chr1	178059889	178060388	0#	2#[CTTCCTCT:217:1.0000000000000002] [CTTCCTGA:33:0.8653647538446115]	0#	501	220	141	1105.32	40.97	0	+	NM_173509	DE	DownStream Enhancer	177978920	81189	FAM163A	148753	protein-coding
chr1	178118138	178119317	1#[GAAAGAGGAAGTG:407:0.9837820116239603]	3#[AGAGGAAG:1071:1.0] [ATTCCTCT:586:0.840598909800833] [CGGGGAAG:772:0.8336868838942818]	3#[TGACCC:762:0.8857896050338628] [TGACCA:11:0.8180826906887997] [TGACCA:559:0.8180826906887997]	1181	426	252	1403.49	51.25	0	+	NM_001267578	PP	Proximal Promoter	178117799	765	TOR1AIP1	26092	protein-coding
chr1	178187480	178187861	1#[CACTTCCCATTTC:227:0.8498809133748872]	0#	1#[GGGTCA:373:0.8857896050338628]	383	210	29	135.55	18.27	0.05	+	NM_014810	UE	Upstream Enhancer	178190530	-2840	CEP350	9857	protein-coding
chr1	178191485	178191881	0#	1#[TGGGGAAG:193:0.925367388796723]	0#	398	209	30	167.39	24.31	0.03	+	NM_014810	Body	Gene Body	178190530	1164	CEP350	9857	protein-coding
chr1	178380758	178381200	1#[CAGTTCCCCTTTC:227:0.85822169781568]	4#[CTTCCTCC:402:0.9250330832242935] [AGAGGAAA:170:0.8910059604551641] [CTTCCCCC:414:0.874687652128954] [TTTCCCCT:192:0.8406605293598248]	3#[TGACCT:74:1.0] [GGGTCA:43:0.8857896050338628] [TGACCA:96:0.8180826906887997]	444	247	30	209.68	34.88	0.04	+	NM_002826	UE	Upstream Enhancer	178390590	-9585	QSOX1	5768	protein-coding
chr1	178386768	178387041	0#	1#[AGTGGAAG:91:0.8808814310639483]	0#	275	106	31	137.82	12.26	0.04	+	NM_002826	UE	Upstream Enhancer	178390590	-3716	QSOX1	5768	protein-coding
chr1	178391921	178392612	1#[GAAAGGGGAACTG:255:0.8582216978156799]	2#[GGAGGAAG:615:0.9250330832242935] [CTTCCTGA:155:0.8653647538446115]	4#[TGACCT:478:1.0] [TGGTCA:203:0.8180826906887997] [TGGTCA:570:0.8180826906887997] [TGGTCA:600:0.8180826906887997]	693	270	40	178.83	15.36	0.04	+	NM_002826	Body	Gene Body	178390590	1601	QSOX1	5768	protein-coding
chr1	178443821	178444466	0#	5#[CTTCCTCT:273:1.0000000000000002] [CTTCCTCT:398:1.0000000000000002] [TTTCCTCT:290:0.8910059604551641] [CTTCCACT:606:0.8808814310639483] [CTTCCTGA:355:0.8653647538446115]	1#[TGACCT:637:1.0]	647	394	62	223.95	17.73	0.03	+	NM_033343	UE	Upstream Enhancer	178466055	-21840	LHX4	89884	protein-coding
chr1	178447506	178447911	1#[CACTTCCTGATTT:275:0.8661037851935528]	0#	0#	407	273	40	242.88	26.16	0.03	+	NM_033343	UE	Upstream Enhancer	178466055	-18276	LHX4	89884	protein-coding
chr1	178488369	178488814	0#	3#[CTTCCCCA:154:0.925367388796723] [AGTGGAAG:128:0.8808814310639483] [CTTCCACA:164:0.8565942509560106]	1#[AGGTCA:145:1.0]	447	194	28	126.62	17.49	0.07	+	NM_033343	Body	Gene Body	178466055	22508	LHX4	89884	protein-coding
chr1	178846867	178847427	1#[TAAAGAGGAAGTG:388:0.9526935748057962]	2#[CTTCCCCA:110:0.925367388796723] [AGAGGAAA:255:0.8910059604551641]	0#	562	401	100	876.65	81.69	0	+	NM_001135669	UE	Upstream Enhancer	178867768	-20500	XPR1	9213	protein-coding
chr1	178853172	178854199	1#[CACTTCCCCTTTC:558:0.9435533588315557]	2#[ACAGGAAG:82:0.8896519339525494] [GTTCCCCA:31:0.8532738713905553]	5#[TGACCT:389:1.0] [AGGTCA:407:1.0] [AGGTCA:613:1.0] [TGACCT:969:1.0] [TGGTCA:525:0.8180826906887997]	1029	576	75	445.54	47.8	0.03	+	NM_001135669	UE	Upstream Enhancer	178867768	-14020	XPR1	9213	protein-coding
chr1	179027565	179027858	1#[GACTTCCTGTTTT:120:0.8162075240398107]	1#[TCAGGAAG:220:0.8653647538446115]	1#[TGACCT:4:1.0]	295	173	28	183.67	22.87	0.04	+	NM_001135669	Body	Gene Body	178867768	159970	XPR1	9213	protein-coding
chr1	179211386	179211720	0#	1#[GGAGGAAG:131:0.9250330832242935]	1#[TGACCT:178:1.0]	336	165	41	218.63	18.88	0.04	-	NM_005819	Body	Gene Body	179258669	-47118	STX6	10228	protein-coding
chr1	179257791	179258367	0#	1#[CTTCCCCA:304:0.925367388796723]	1#[TGGTCA:456:0.8180826906887997]	578	210	37	163.08	17.28	0.03	-	NM_005819	PP	Proximal Promoter	179258669	-668	STX6	10228	protein-coding
chr1	179268776	179269326	1#[TACTTCCTCTTTC:259:0.8451196230911928]	0#	1#[TGGTCA:163:0.8180826906887997]	552	266	86	524.64	32.09	0	+	NM_001195000	PP	Proximal Promoter	179269183	-141	MR1	3140	protein-coding
chr1	179278715	179279182	0#	3#[ACAGGAAG:249:0.8896519339525494] [CTTCCACT:209:0.8808814310639483] [GGGGGAAG:261:0.8746876521289542]	1#[AGGTCA:273:1.0]	469	288	35	193.87	20.72	0.04	+	NM_001195000	Body	Gene Body	179269183	9820	MR1	3140	protein-coding
chr1	179297788	179298836	1#[AAATAAGGAAGTG:583:0.8679247394016302]	2#[TTTCCTCT:248:0.8910059604551641] [ACAGGAAG:953:0.8896519339525494]	2#[AGGTCA:388:1.0] [TGGTCA:1033:0.8180826906887997]	1050	570	144	899.57	44.19	0	+	NM_001195000	DE	DownStream Enhancer	179269183	29175	MR1	3140	protein-coding
chr1	179322886	179323485	0#	3#[CTTCCTCT:85:1.0000000000000002] [CTTCCCCC:404:0.874687652128954] [GGAGGAAC:117:0.8529395658181258]	2#[TGGTCA:215:0.8180826906887997] [TGACCA:270:0.8180826906887997]	601	409	86	524.64	34.24	0	+	NM_016545	PP	Proximal Promoter	179324260	-965	IER5	51278	protein-coding
chr1	179325342	179326248	0#	4#[AGAGGAAG:186:1.0] [CTTCCCCA:598:0.925367388796723] [TTTCCTCT:636:0.8910059604551641] [GTTCCCCA:690:0.8532738713905553]	0#	908	696	66	272.27	23.26	0.04	+	NM_016545	Body	Gene Body	179324260	1778	IER5	51278	protein-coding
chr1	179733612	179733935	1#[CAGTTCCCCTTTC:185:0.85822169781568]	0#	3#[TGACCT:315:1.0] [GGGTCA:62:0.8857896050338628] [TGGTCA:26:0.8180826906887997]	325	185	22	129.06	18.09	0.07	+	NM_000721	Body	Gene Body	179719308	14489	CACNA1E	777	protein-coding
chr1	179740481	179741090	1#[CATTTCCTCATTT:337:0.8184653083609043]	0#	0#	611	321	96	781.16	59.2	0	+	NM_000721	Body	Gene Body	179719308	21494	CACNA1E	777	protein-coding
chr1	179742277	179742758	0#	0#	0#	483	270	43	210.17	21.66	0.04	+	NM_000721	Body	Gene Body	179719308	23239	CACNA1E	777	protein-coding
chr1	179772444	179772834	0#	2#[CTTCCCCA:124:0.925367388796723] [CTTCCTGT:86:0.8896519339525494]	4#[GGGTCA:50:0.8857896050338628] [TGACCA:62:0.8180826906887997] [TGGTCA:281:0.8180826906887997] [TGGTCA:361:0.8180826906887997]	392	114	53	481.41	59.26	0	+	NM_000721	Body	Gene Body	179719308	53250	CACNA1E	777	protein-coding
chr1	180276580	180277104	0#	3#[CTTCCTCA:59:0.9757128198920624] [CTTCCCCT:321:0.9496545689046608] [AGAGGAAC:199:0.9279064825938323]	1#[AGGTCA:288:1.0]	526	233	30	113.14	10.49	0.1	-	NM_001009992	DE	DownStream Enhancer	180297470	-20657	ZNF648	127665	protein-coding
chr1	180316809	180317331	0#	4#[TGAGGAAG:95:0.9757128198920622] [AGGGGAAG:207:0.9496545689046608] [CTTCCCCA:442:0.925367388796723] [TGTGGAAG:132:0.8565942509560106]	0#	524	217	49	362.31	37.79	0.03	-	NM_001009992	UE	Upstream Enhancer	180297470	19556	ZNF648	127665	protein-coding
chr1	180320737	180321044	0#	1#[GGAGGAAG:190:0.9250330832242935]	1#[TGACCA:105:0.8180826906887997]	309	206	69	643.97	50.39	0	-	NM_001009992	UE	Upstream Enhancer	180297470	23473	ZNF648	127665	protein-coding
chr1	180329775	180330318	1#[AAAAGAGGAAGTC:353:0.8913317838010807]	1#[ACAGGAAG:179:0.8896519339525494]	1#[AGGTCA:433:1.0]	545	356	31	211.21	32.41	0.04	-	NM_001009992	UE	Upstream Enhancer	180297470	32661	ZNF648	127665	protein-coding
chr1	180646660	180647074	1#[GACTTCCTTTTTC:234:0.8018104898718494]	0#	0#	416	236	30	214.14	32.25	0.04	+	NR_034131	Body	Gene Body	180643378	3518	LINC00272	388719	miscRNA
chr1	180720131	180720836	0#	2#[AGGGGAAG:450:0.9496545689046608] [TTTCCTCA:256:0.8667187803472263]	1#[TGACCG:11:0.8490319803691448]	707	431	106	577.33	27.91	0	+	NM_001137669	Body	Gene Body	180685878	34684	RGSL1	353299	protein-coding
chr1	180763049	180763382	1#[CACTTCCCCATTT:207:0.900999392162418]	0#	1#[TGGTCA:198:0.8180826906887997]	335	222	19	131.91	29.22	0.05	+	NM_001137669	Body	Gene Body	180685878	77393	RGSL1	353299	protein-coding
chr1	180834136	180834449	1#[CACTTCCCCTTTT:199:0.959771347207595]	0#	1#[TGACCC:216:0.8857896050338628]	315	187	33	239.02	27.91	0.03	-	NM_002928	DE	DownStream Enhancer	180840171	-5848	RGS16	6004	protein-coding
chr1	180865354	180865765	0#	1#[CTTCCTGT:308:0.8896519339525494]	3#[AGGTCA:145:1.0] [TGACCT:283:1.0] [TGGTCA:232:0.8180826906887997]	413	306	33	206.28	25.21	0.03	+	NR_036490	DE	DownStream Enhancer	180850897	14763	LOC284648	284648	miscRNA
chr1	180868343	180868676	1#[CACTTCCTTCTTT:204:0.8458070606165928]	0#	2#[TGACCC:85:0.8857896050338628] [TGACCA:31:0.8180826906887997]	335	213	43	384.16	49.19	0.03	-	NM_001102450	DE	DownStream Enhancer	180908690	-40134	RGS8	85397	protein-coding
chr1	181017965	181018497	0#	4#[AGAGGAAG:345:1.0] [ACAGGAAG:247:0.8896519339525494] [AGTGGAAG:186:0.8808814310639483] [AGTGGAAG:327:0.8808814310639483]	2#[TGACCT:79:1.0] [GGGTCA:308:0.8857896050338628]	534	358	46	131.38	12.42	0.06	+	NM_030769	UE	Upstream Enhancer	181025206	-6883	NPL	80896	protein-coding
chr1	181065368	181065728	0#	2#[CTTCCTCT:31:1.0000000000000002] [CTTCCCCT:51:0.9496545689046608]	0#	362	122	26	164.09	23.85	0.03	+	NM_030769	Body	Gene Body	181025206	40284	NPL	80896	protein-coding
chr1	181075287	181075719	0#	3#[CTTCCTCC:197:0.9250330832242935] [AGAGGAAA:351:0.8910059604551641] [GGGGGAAG:46:0.8746876521289542]	0#	434	198	34	120.58	13.46	0.07	+	NR_033302	PP	Proximal Promoter	181075061	424	DHX9	1660	protein-coding
chr1	181260311	181260793	0#	0#	0#	484	252	33	133.83	20.1	0.05	+	NM_002293	Body	Gene Body	181259217	1346	LAMC1	3915	protein-coding
chr1	181275748	181276283	0#	3#[CTTCCTCA:278:0.9757128198920624] [AGAGGAAC:384:0.9279064825938323] [ACAGGAAG:350:0.8896519339525494]	0#	537	361	45	151.32	11.92	0.04	+	NM_002293	Body	Gene Body	181259217	16892	LAMC1	3915	protein-coding
chr1	181380433	181380809	1#[CACTTCCTGTTTC:187:0.9086577518626905]	0#	0#	378	180	24	157.29	21.59	0.03	+	NM_002293	Body	Gene Body	181259217	121396	LAMC1	3915	protein-coding
chr1	181480391	181480641	0#	1#[GGAGGAAC:157:0.8529395658181258]	0#	252	168	24	145.13	14.65	0.04	+	NM_005562	Body	Gene Body	181421796	58763	LAMC2	3918	protein-coding
chr1	181495701	181496169	0#	0#	1#[GGGTCA:246:0.8857896050338628]	470	235	28	127.69	24.05	0.06	-	NM_170706	Body	Gene Body	181540632	-44696	NMNAT2	23057	protein-coding
chr1	181515628	181516163	0#	2#[AGAGGAAC:272:0.9279064825938323] [GTTCCTCA:334:0.9036193024858946]	2#[AGGTCA:369:1.0] [GGGTCA:188:0.8857896050338628]	537	282	41	155.59	10.41	0.03	-	NM_170706	Body	Gene Body	181540632	-24722	NMNAT2	23057	protein-coding
chr1	181705891	181706226	0#	0#	0#	337	94	20	138.52	26.26	0.04	-	NR_040063	Body	Gene Body	181707740	-1755	SMG7-AS1	284649	miscRNA
chr1	181706681	181707534	0#	5#[GGAGGAAG:713:0.9250330832242935] [TTTCCTCT:49:0.8910059604551641] [AGAGGAAA:612:0.8910059604551641] [CTTCCTCG:499:0.8840323149896212] [GGAGGAAC:129:0.8529395658181258]	2#[AGGTCA:315:1.0] [TGACCC:841:0.8857896050338628]	855	129	40	156.23	10.47	0.03	-	NR_040063	PP	Proximal Promoter	181707740	-930	SMG7-AS1	284649	miscRNA
chr1	181707556	181708318	0#	7#[CTTCCTCT:56:1.0000000000000002] [CTTCCTCT:545:1.0000000000000002] [AGAGGAAG:714:1.0] [TGGGGAAG:226:0.925367388796723] [GGAGGAAG:203:0.9250330832242935] [GGGGGAAG:283:0.8746876521289542] [GGAGGAAC:191:0.8529395658181258]	0#	764	531	97	635.43	36.67	0	+	NM_173156	PP	Proximal Promoter	181708128	-41	SMG7	9887	protein-coding
chr1	181708605	181709177	0#	4#[TGGGGAAG:44:0.925367388796723] [TGGGGAAG:403:0.925367388796723] [GGAGGAAG:230:0.9250330832242935] [TGAGGAAA:411:0.8667187803472263]	0#	574	238	39	158.16	15.78	0.03	+	NM_173156	PP	Proximal Promoter	181708128	715	SMG7	9887	protein-coding
chr1	181803187	181803792	0#	3#[GGAGGAAG:202:0.9250330832242935] [GGAGGAAG:344:0.9250330832242935] [AGGGGAAC:281:0.8775610514984932]	1#[TGGTCA:276:0.8180826906887997]	607	294	33	133.83	13.11	0.05	-	NM_001190794	Body	Gene Body	181826362	-22881	NCF2	4688	protein-coding
chr1	181815994	181816449	0#	3#[AGAGGAAG:87:1.0] [CTTCCTCC:328:0.9250330832242935] [GTTCCGCT:124:0.8649409455643936]	0#	457	332	50	221.14	12.4	0.03	-	NM_001190794	Body	Gene Body	181826362	-10036	NCF2	4688	protein-coding
chr1	181826083	181826606	0#	2#[AGAGGAAG:287:1.0] [GTTCCCCA:321:0.8532738713905553]	0#	525	313	163	1722.61	108.53	0	-	NM_001190794	PP	Proximal Promoter	181826362	34	NCF2	4688	protein-coding
chr1	181829111	181829616	0#	5#[CTTCCTCA:261:0.9757128198920624] [CTTCCTCC:198:0.9250330832242935] [CTTCCTCC:452:0.9250330832242935] [CTTCCCCC:220:0.874687652128954] [TTTCCCCT:128:0.8406605293598248]	2#[AGGTCA:122:1.0] [TGACCT:291:1.0]	507	260	48	213.73	21.2	0.04	-	NM_001190794	UE	Upstream Enhancer	181826362	3009	NCF2	4688	protein-coding
chr1	181839712	181841158	0#	11#[AGAGGAAG:1085:1.0] [CTTCCTCA:696:0.9757128198920624] [AGGGGAAG:469:0.9496545689046608] [CTTCCCCT:795:0.9496545689046608] [CTTCCCCT:1021:0.9496545689046608] [GGAGGAAG:382:0.9250330832242935] [CTTCCTCC:824:0.9250330832242935] [TGCGGAAG:1137:0.9127472828626235] [ACAGGAAG:59:0.8896519339525494] [GGCGGAAG:526:0.8620675461948546] [TGGGGAAC:1194:0.8532738713905553]	2#[CGGTCA:402:0.8490319803691448] [TGGTCA:749:0.8180826906887997]	1448	1059	214	1265.12	47.82	0	-	NM_001190794	UE	Upstream Enhancer	181826362	14409	NCF2	4688	protein-coding
chr1	181871145	181871718	0#	2#[CTTCCGCT:372:0.9370344629705614] [CTTCCTCC:440:0.9250330832242935]	0#	575	369	67	439.17	37.25	0.03	-	NM_001270439	PP	Proximal Promoter	181871699	-185	ARPC5	10092	protein-coding
chr1	182028031	182028386	1#[AAAAGAGGAAGTC:240:0.8913317838010807]	1#[AGTGGAAG:181:0.8808814310639483]	0#	357	245	38	367.17	62.27	0.03	+	NM_015149	Body	Gene Body	181871830	156446	RGL1	23179	protein-coding
chr1	182118276	182118713	1#[TAAAGGGGAAGTG:205:0.9124649220133912]	0#	0#	439	200	25	127.39	24.55	0.06	+	NM_015149	Body	Gene Body	181871830	246646	RGL1	23179	protein-coding
chr1	182119514	182119876	0#	1#[AGAGGAAG:63:1.0]	1#[TGACCT:137:1.0]	364	109	26	213.47	38.01	0.04	+	NM_015149	Body	Gene Body	181871830	247793	RGL1	23179	protein-coding
chr1	182120224	182120704	1#[CAGTTCCTCTTTT:236:0.9146683389841244]	0#	1#[TGACCC:184:0.8857896050338628]	482	229	45	382.63	50.44	0.03	+	NM_015149	Body	Gene Body	181871830	248623	RGL1	23179	protein-coding
chr1	182192308	182192789	1#[AAAACAGGAAGTG:296:0.9248757402387296]	0#	0#	483	315	118	974.5	54.06	0	-	NM_015101	Body	Gene Body	182273486	-80863	GLT25D2	23127	protein-coding
chr1	182228875	182229206	0#	3#[CTTCCTCT:50:1.0000000000000002] [AGAGGAAG:179:1.0] [ACAGGAAG:109:0.8896519339525494]	0#	333	199	39	425.8	75.83	0.03	-	NM_015101	Body	Gene Body	182273486	-44412	GLT25D2	23127	protein-coding
chr1	182602690	182603192	0#	1#[CTTCCCCC:53:0.874687652128954]	2#[TGACCT:241:1.0] [TGGTCA:418:0.8180826906887997]	504	325	51	454.48	50.39	0	+	NM_030806	UE	Upstream Enhancer	182622772	-19757	C1orf21	81563	protein-coding
chr1	182722652	182723056	0#	2#[AGAGGAAG:184:1.0] [CTTCCCCT:216:0.9496545689046608]	0#	406	180	28	151.62	23.6	0.04	+	NM_030806	Body	Gene Body	182622772	100060	C1orf21	81563	protein-coding
chr1	182768796	182769152	0#	4#[CTTCCTCT:170:1.0000000000000002] [CTTCCCCT:251:0.9496545689046608] [CTTCCCCA:141:0.925367388796723] [CTTCCCCA:212:0.925367388796723]	2#[TGACCT:75:1.0] [TGACCC:191:0.8857896050338628]	358	192	60	672.97	77.52	0	+	NM_030806	Body	Gene Body	182622772	146216	C1orf21	81563	protein-coding
chr1	182783820	182784171	1#[GAAAGAGGAAGTG:248:0.9837820116239603]	0#	1#[TGACCC:281:0.8857896050338628]	353	259	110	1002.71	67.03	0	+	NM_030806	Body	Gene Body	182622772	161307	C1orf21	81563	protein-coding
chr1	182856216	182856525	1#[CACTTCCTTTTTC:152:0.9104787060707685]	0#	0#	311	146	23	183.95	38.09	0.04	+	NM_030806	Body	Gene Body	182622772	233590	C1orf21	81563	protein-coding
chr1	182983015	182983428	1#[AAAAGAGGAAGTG:208:0.9999999999999994]	1#[AGAAGAAG:270:0.839218783233912]	0#	415	226	45	453.95	76.74	0	-	NM_025191	Body	Gene Body	182990664	-7423	EDEM3	80267	protein-coding
chr1	182988395	182988743	0#	1#[CTTCCTCA:217:0.9757128198920624]	0#	350	197	34	256.6	28.49	0.04	-	NM_025191	Body	Gene Body	182990664	-2072	EDEM3	80267	protein-coding
chr1	182989416	182989655	0#	1#[TTTCCTCT:94:0.8910059604551641]	0#	241	79	18	115.89	18.09	0.08	-	NM_025191	Body	Gene Body	182990664	-1169	EDEM3	80267	protein-coding
chr1	183022293	183022760	1#[TACTTCCTCTTTC:341:0.8451196230911928]	2#[TGGGGAAG:44:0.925367388796723] [GGAGGAAG:291:0.9250330832242935]	2#[CGGTCA:254:0.8490319803691448] [TGACCA:62:0.8180826906887997]	469	302	43	209.34	19.38	0.04	-	NM_052966	DE	DownStream Enhancer	183210305	-187710	FAM129A	116496	protein-coding
chr1	183028289	183028813	0#	0#	0#	526	199	31	119.91	12.23	0.08	-	NM_052966	Body	Gene Body	183210305	-181817	FAM129A	116496	protein-coding
chr1	183041862	183042561	0#	2#[GTTCCTCT:523:0.9279064825938323] [CTTCCCCA:618:0.925367388796723]	4#[GGGTCA:363:0.8857896050338628] [GGGTCA:402:0.8857896050338628] [TGGTCA:126:0.8180826906887997] [TGGTCA:134:0.8180826906887997]	701	486	53	268.41	26.49	0.04	-	NM_052966	Body	Gene Body	183210305	-167957	FAM129A	116496	protein-coding
chr1	183103667	183104042	0#	1#[TGGGGAAG:59:0.925367388796723]	1#[AGGTCA:362:1.0]	377	133	24	145.13	21.92	0.04	-	NM_052966	Body	Gene Body	183210305	-106505	FAM129A	116496	protein-coding
chr1	183140686	183141177	0#	0#	2#[GGGTCA:397:0.8857896050338628] [TGACCA:270:0.8180826906887997]	493	109	34	215.84	15.76	0.04	-	NM_052966	Body	Gene Body	183210305	-69510	FAM129A	116496	protein-coding
chr1	183153177	183153561	1#[GACTTCCTCTTTT:167:0.891331783801081]	2#[CTTCCTCA:349:0.9757128198920624] [CTTCCACT:93:0.8808814310639483]	1#[TGACCT:17:1.0]	386	157	30	227.43	36.54	0.03	-	NM_052966	Body	Gene Body	183210305	-56971	FAM129A	116496	protein-coding
chr1	183155611	183156019	1#[TAAAGAGGAAGTG:214:0.9526935748057962]	0#	0#	410	236	50	336.89	40.05	0.02	-	NM_052966	Body	Gene Body	183210305	-54458	FAM129A	116496	protein-coding
chr1	183209247	183209696	0#	1#[GTTCCTCT:224:0.9279064825938323]	0#	451	231	61	581.24	70.42	0	-	NM_052966	PP	Proximal Promoter	183210305	-827	FAM129A	116496	protein-coding
chr1	183210229	183210604	0#	1#[GGAGGAAG:217:0.9250330832242935]	1#[CGGTCA:170:0.8490319803691448]	377	161	26	130.9	16.91	0.06	-	NM_052966	PP	Proximal Promoter	183210305	85	FAM129A	116496	protein-coding
chr1	183217900	183218246	0#	1#[TGGGGAAG:141:0.925367388796723]	0#	348	220	19	128.53	21.32	0.07	-	NM_052966	UE	Upstream Enhancer	183210305	7815	FAM129A	116496	protein-coding
chr1	183552915	183553913	0#	7#[TGAGGAAG:672:0.9757128198920622] [CTTCCCCT:480:0.9496545689046608] [GTTCCTCT:361:0.9279064825938323] [CTTCCTCC:264:0.9250330832242935] [CTTCCACT:821:0.8808814310639483] [GGGGGAAG:633:0.8746876521289542] [AGAAGAAG:695:0.839218783233912]	1#[AGGTCA:308:1.0]	1000	625	91	477.72	16.1	0	-	NM_006469	PP	Proximal Promoter	183553084	456	IVNS1ABP	10625	protein-coding
chr1	183574386	183574917	0#	1#[ACAGGAAG:185:0.8896519339525494]	0#	533	291	68	304.4	18.08	0.02	-	NR_038424	UE	Upstream Enhancer	183570794	3883	LOC100288079	100288079	pseudo
chr1	183609658	183610059	1#[CACTTCCCCTTCT:158:0.8093047619639978]	0#	1#[CGGTCA:88:0.8490319803691448]	403	155	76	638.76	57.17	0	-	NR_038424	UE	Upstream Enhancer	183570794	39019	LOC100288079	100288079	pseudo
chr1	184302104	184302619	1#[CACTTCCCTTTTT:289:0.886468041654403]	0#	0#	517	293	61	663.78	112.63	0	+	NM_031935	Body	Gene Body	183970305	332092	HMCN1	83872	protein-coding
chr1	184524604	184524831	1#[CAGTTCCTGTTTT:89:0.839544079222854]	0#	0#	229	101	17	159.26	38.4	0.03	-	NR_046941	Body	Gene Body	184547651	-22946	RNU6-72	100873775	snRNA
chr1	184610994	184611653	0#	1#[CGGGGAAG:495:0.8336868838942818]	1#[TGACCT:311:1.0]	661	211	43	144.64	8.72	0.04	+	NM_001164246	PP	Proximal Promoter	184611512	-307	C1orf27	54953	protein-coding
chr1	184665216	184665525	0#	1#[CTTCCTCT:125:1.0000000000000002]	1#[TGACCC:83:0.8857896050338628]	311	87	17	129.94	27.91	0.06	+	NM_001164246	DE	DownStream Enhancer	184611512	53791	C1orf27	54953	protein-coding
chr1	184737876	184738088	1#[AAAAGAGGAAATG:132:0.8772372634060811]	0#	0#	214	128	20	203.69	43.52	0.03	-	NM_002597	UE	Upstream Enhancer	184696863	41141	PDC	5132	protein-coding
chr1	185139553	185139851	1#[CACTTCCTTATTT:154:0.8679247394016307]	1#[CTTCCACA:100:0.8565942509560106]	0#	300	148	49	599.16	81.92	0	+	NM_024420	Body	Gene Body	185064654	75047	PLA2G4A	5321	protein-coding
chr1	185140266	185140548	1#[CAATGAGGAAGTG:63:0.8992440432374731]	0#	1#[TGACCC:50:0.8857896050338628]	284	118	26	255.9	53.76	0.04	+	NM_024420	Body	Gene Body	185064654	75730	PLA2G4A	5321	protein-coding
chr1	185157190	185157555	1#[CACTTCCTCTTCT:155:0.8495334147564029]	0#	0#	367	147	52	559.6	96.02	0	+	NM_024420	Body	Gene Body	185064654	92683	PLA2G4A	5321	protein-coding
chr1	185214299	185214936	1#[AAATGGGGAAGTG:271:0.9009993921624174]	2#[TGGGGAAC:243:0.8532738713905553] [TGGGGAAC:478:0.8532738713905553]	2#[GGGTCA:522:0.8857896050338628] [TGACCA:467:0.8180826906887997]	639	306	87	955.96	118.6	0	+	NM_024420	Body	Gene Body	185064654	149951	PLA2G4A	5321	protein-coding
chr1	188391388	188391614	0#	3#[CTTCCCCT:191:0.9496545689046608] [CTTCCCCC:132:0.874687652128954] [TTTCCCCT:66:0.8406605293598248]	0#	228	144	15	135	30.72	0.05	-	NM_199051	Body	Gene Body	188713382	-321850	FAM5C	339479	protein-coding
chr1	190394016	190394312	0#	1#[TTTCCTCA:192:0.8667187803472263]	0#	298	213	24	224.68	46.08	0.03	+	NM_130782	PP	Proximal Promoter	190394214	15	RGS18	64407	protein-coding
chr1	190397797	190398086	1#[CACTTCCTGTTTT:116:0.9248757402387298]	1#[CTTCCTCA:151:0.9757128198920624]	0#	291	145	36	299.37	37.47	0.04	+	NM_130782	Body	Gene Body	190394214	3728	RGS18	64407	protein-coding
chr1	190406004	190406444	0#	3#[CTTCCCCT:195:0.9496545689046608] [CTTCCTCC:207:0.9250330832242935] [CTTCCTGA:225:0.8653647538446115]	2#[TGACCT:3:1.0] [GGGTCA:43:0.8857896050338628]	442	198	30	151.54	23.64	0.04	+	NM_130782	Body	Gene Body	190394214	11988	RGS18	64407	protein-coding
chr1	190781746	190782110	0#	1#[TGAGGAAG:148:0.9757128198920622]	0#	366	202	28	151.62	19.15	0.04	+	NM_002922	UE	Upstream Enhancer	190811479	-29531	RGS1	5996	protein-coding
chr1	190786870	190787257	0#	3#[TGGGGAAG:143:0.925367388796723] [ACAGGAAG:260:0.8896519339525494] [CTTCCCCC:120:0.874687652128954]	2#[TGACCT:165:1.0] [AGGTCA:225:1.0]	389	163	31	159.75	17.19	0.03	+	NM_002922	UE	Upstream Enhancer	190811479	-24446	RGS1	5996	protein-coding
chr1	190811194	190811649	0#	1#[AGGGGAAC:224:0.8775610514984932]	1#[TGACCT:134:1.0]	457	235	33	206.28	29.23	0.03	+	NM_002922	PP	Proximal Promoter	190811479	-50	RGS1	5996	protein-coding
chr1	190844809	190845328	1#[CAGTTCCTCTTTT:252:0.9146683389841244]	0#	0#	521	253	233	2582.87	100.72	0	+	NM_144766	UE	Upstream Enhancer	190871890	-26828	RGS13	6003	protein-coding
chr1	191031670	191031977	1#[CACTTCCTTATTT:205:0.8679247394016307]	1#[TGGGGAAG:3:0.925367388796723]	1#[TGACCA:102:0.8180826906887997]	309	203	35	267.52	31.14	0.04	+	NM_002923	UE	Upstream Enhancer	191044791	-12918	RGS2	5997	protein-coding
chr1	191041681	191041965	0#	1#[CTTCCTCT:137:1.0000000000000002]	0#	286	177	31	278.47	29.93	0.04	+	NM_002923	UE	Upstream Enhancer	191044791	-2933	RGS2	5997	protein-coding
chr1	191045942	191046410	0#	4#[TGAGGAAG:190:0.9757128198920622] [TGGGGAAG:425:0.925367388796723] [AGGGGAAC:133:0.8775610514984932] [ATTCCTCT:18:0.840598909800833]	1#[TGGTCA:206:0.8180826906887997]	470	145	95	1006.43	85.76	0	+	NM_002923	Body	Gene Body	191044791	1296	RGS2	5997	protein-coding
chr1	191203315	191203614	0#	1#[AGAGGAAG:120:1.0]	0#	301	134	22	163.2	28	0.03	-	NM_015984	DE	DownStream Enhancer	191295146	-91697	UCHL5	51377	protein-coding
chr1	191294220	191294597	0#	2#[TGAGGAAA:65:0.8667187803472263] [AGCGGAAC:143:0.8649409455643936]	1#[TGACCT:345:1.0]	379	150	32	196.85	26.44	0.04	-	NM_015984	PP	Proximal Promoter	191295146	-776	UCHL5	51377	protein-coding
chr1	191306748	191307094	0#	2#[ACAGGAAG:192:0.8896519339525494] [TGTGGAAG:12:0.8565942509560106]	0#	348	223	54	494.13	47.21	0	+	NR_033393	Body	Gene Body	191295174	11797	TROVE2	6738	protein-coding
chr1	191296846	191297067	0#	1#[CTTCCTCA:146:0.9757128198920624]	0#	223	121	17	120.13	20.35	0.08	-	NR_037607	PP	Proximal Promoter	191295860	1107	UCHL5	51377	protein-coding
chr1	191340193	191340680	1#[AAACGAGGAAGTG:250:0.8962964614022487]	1#[CTTCCACT:216:0.8808814310639483]	1#[CGGTCA:411:0.8490319803691448]	489	163	48	205.96	15.79	0.03	-	NM_197962	PP	Proximal Promoter	191341231	-875	GLRX2	51022	protein-coding
chr1	195627697	195628026	0#	2#[CTTCCTCT:243:1.0000000000000002] [AGGGGAAC:144:0.8775610514984932]	0#	331	157	34	315.78	50.03	0.02	+	NM_001257965	Body	Gene Body	195437214	190640	CRB1	23418	protein-coding
chr1	195629699	195630022	0#	1#[CTTCCACT:218:0.8808814310639483]	1#[TGACCC:87:0.8857896050338628]	325	240	16	122.79	23.04	0.07	+	NM_001257965	Body	Gene Body	195437214	192725	CRB1	23418	protein-coding
chr1	195856769	195856995	0#	2#[TGGGGAAG:68:0.925367388796723] [GGAGGAAG:92:0.9250330832242935]	1#[AGGTCA:120:1.0]	228	81	15	135	30.72	0.05	-	NM_144977	Body	Gene Body	196011246	-154396	DENND1B	163486	protein-coding
chr1	196005947	196006316	0#	1#[AGAGGAAG:229:1.0]	0#	371	227	27	218.93	45.3	0.04	-	NM_144977	Body	Gene Body	196011246	-5072	DENND1B	163486	protein-coding
chr1	196010992	196011551	0#	3#[GGGGGAAG:262:0.8746876521289542] [TCAGGAAG:245:0.8653647538446115] [CTTCCCCG:88:0.8336868838942818]	0#	561	259	56	222.53	12.79	0.03	-	NM_144977	PP	Proximal Promoter	196011246	5	DENND1B	163486	protein-coding
chr1	196093227	196093594	0#	1#[AGTGGAAG:106:0.8808814310639483]	1#[TGACCT:347:1.0]	369	188	29	241.45	48.45	0.03	+	NM_001024594	UE	Upstream Enhancer	196138304	-44889	C1orf53	388722	protein-coding
chr1	196116294	196116463	1#[GACTTCCTCTTTT:53:0.891331783801081]	0#	0#	171	85	14	124.87	27.84	0.07	+	NM_001024594	UE	Upstream Enhancer	196138304	-21925	C1orf53	388722	protein-coding
chr1	196367865	196368446	1#[GAAAGAGGAAGTG:137:0.9837820116239603]	1#[CTTCCCGT:408:0.83930650285721]	1#[AGGTCA:207:1.0]	583	160	100	811.33	66.82	0	+	NM_133494	UE	Upstream Enhancer	196392730	-24705	NEK7	140609	protein-coding
chr1	196725953	196726299	1#[CAGTTCCTCTTTT:212:0.9146683389841244]	0#	0#	348	194	22	163.2	34.4	0.03	-	NM_133326	DE	DownStream Enhancer	196776698	-50551	ATP6V1G3	127124	protein-coding
chr1	196792583	196793178	1#[GAAAAAGGAAGTG:244:0.9104787060707681]	2#[AGAGGAAC:69:0.9279064825938323] [CTTCCTGT:228:0.8896519339525494]	0#	597	258	102	777.72	60.74	0	-	NM_133326	UE	Upstream Enhancer	196776698	16143	ATP6V1G3	127124	protein-coding
chr1	196856676	196857394	0#	4#[CTTCCGCT:143:0.9370344629705614] [TGCGGAAG:127:0.9127472828626235] [CTTCCTGT:431:0.8896519339525494] [GGAGGAAC:68:0.8529395658181258]	1#[AGGTCA:656:1.0]	720	92	116	1016.66	39.47	0	+	NM_001267798	UE	Upstream Enhancer	196874720	-17952	PTPRC	5788	protein-coding
chr1	196858333	196858704	1#[CACTTCCTCCTTT:204:0.919110366169785]	2#[CTTCCCCC:139:0.874687652128954] [CTTCTTCT:17:0.8392187832339122]	0#	373	203	33	299.57	50.74	0.04	+	NM_001267798	UE	Upstream Enhancer	196874720	-16184	PTPRC	5788	protein-coding
chr1	196869323	196869917	0#	1#[TGAGGAAG:447:0.9757128198920622]	2#[GGGTCA:24:0.8857896050338628] [TGGTCA:429:0.8180826906887997]	596	458	49	256.57	17.44	0.04	+	NM_001267798	UE	Upstream Enhancer	196874720	-4939	PTPRC	5788	protein-coding
chr1	196874478	196874919	0#	0#	0#	443	252	52	318.99	25.76	0.02	+	NM_001267798	PP	Proximal Promoter	196874720	10	PTPRC	5788	protein-coding
chr1	196917565	196917955	0#	0#	0#	392	133	47	243.49	13.67	0.03	+	NM_001267798	Body	Gene Body	196874720	42978	PTPRC	5788	protein-coding
chr1	197012261	197012881	0#	4#[AGAGGAAG:234:1.0] [AGAGGAAG:391:1.0] [CTTCCCCT:456:0.9496545689046608] [CTTCCTGT:294:0.8896519339525494]	0#	622	401	150	1384.43	70.52	0	+	NM_002838	DE	DownStream Enhancer	196874720	137942	PTPRC	5788	protein-coding
chr1	197175702	197176019	0#	2#[CTTCCTCA:230:0.9757128198920624] [ATTCCTCT:124:0.840598909800833]	1#[TGGTCA:59:0.8180826906887997]	319	217	30	285.87	40.91	0.04	-	NR_040073	UE	Upstream Enhancer	197173181	2738	LOC100131234	100131234	miscRNA
chr1	198351379	198351653	0#	2#[GGAGGAAG:124:0.9250330832242935] [TGAGGAAA:241:0.8667187803472263]	1#[GGGTCA:94:0.8857896050338628]	276	198	19	131.91	22.47	0.05	+	NM_205860	Body	Gene Body	198263392	88185	NR5A2	2494	protein-coding
chr1	198389888	198390297	0#	1#[CTTCCTCC:26:0.9250330832242935]	0#	411	217	37	184.97	17.52	0.04	+	NM_205860	Body	Gene Body	198263392	126713	NR5A2	2494	protein-coding
chr1	198591510	198591999	0#	2#[CTTCCTCC:240:0.9250330832242935] [CTTCCACA:391:0.8565942509560106]	1#[GGGTCA:9:0.8857896050338628]	491	240	47	306.6	29.69	0.02	-	NR_040064	Body	Gene Body	198609543	-17793	C1orf98	554279	miscRNA
chr1	198598862	198599357	0#	2#[AGAGGAAG:209:1.0] [GGAGGAAG:343:0.9250330832242935]	0#	497	242	53	416.95	53.46	0.03	-	NR_040064	Body	Gene Body	198609543	-10439	C1orf98	554279	miscRNA
chr1	198599415	198599635	1#[CACTTCCTCTATT:73:0.8281566828903976]	0#	0#	222	84	20	169.61	30.41	0.03	-	NR_040064	Body	Gene Body	198609543	-10044	C1orf98	554279	miscRNA
chr1	198875743	198876153	0#	3#[GGAGGAAC:235:0.8529395658181258] [AGGGGAAA:27:0.8406605293598248] [AGAGGAAT:15:0.840598909800833]	0#	412	224	85	950.42	94.22	0	-	NM_001031725	DE	DownStream Enhancer	198905749	-29782	DDX59	83479	protein-coding
chr1	198905866	198906524	0#	1#[AGAGGAAG:472:1.0]	0#	660	180	42	211.62	17.44	0.04	-	NM_001031725	PP	Proximal Promoter	198905749	297	DDX59	83479	protein-coding
chr1	198935601	198936143	0#	1#[AGAGGAAG:343:1.0]	1#[TGACCC:318:0.8857896050338628]	544	188	81	540.92	36.37	0	-	NM_001031725	UE	Upstream Enhancer	198905749	30040	DDX59	83479	protein-coding
chr1	199098083	199098354	1#[CACTTCCTTTTTG:90:0.8847126927294583]	1#[GGGGGAAG:21:0.8746876521289542]	0#	273	102	23	211.18	39.53	0.04	+	NM_203459	DE	DownStream Enhancer	198975308	122877	CAMSAP2	23271	protein-coding
chr1	199105169	199105522	0#	3#[AGAGGAAG:164:1.0] [GGAGGAAG:216:0.9250330832242935] [CTTCTTCT:232:0.8392187832339122]	0#	355	175	70	514.14	34.4	0	+	NM_005298	UE	Upstream Enhancer	199108788	-3444	GPR25	2848	protein-coding
chr1	199123986	199124920	0#	5#[CTTCCTCT:373:1.0000000000000002] [AGAGGAAG:204:1.0] [CTTCCCCT:718:0.9496545689046608] [TGGGGAAG:348:0.925367388796723] [CTTCCACT:604:0.8808814310639483]	2#[TGACCT:798:1.0] [TGGTCA:196:0.8180826906887997]	936	181	125	592.91	20.13	0	+	NM_018265	UE	Upstream Enhancer	199127249	-3082	C1orf106	55765	protein-coding
chr1	199134723	199135160	0#	2#[AGAGGAAG:187:1.0] [ACAGGAAG:163:0.8896519339525494]	1#[AGGTCA:262:1.0]	439	221	41	218.63	21.27	0.04	+	NM_018265	Body	Gene Body	199127249	7695	C1orf106	55765	protein-coding
chr1	199143410	199143901	0#	2#[GGAGGAAG:221:0.9250330832242935] [TTTCCTCA:50:0.8667187803472263]	0#	493	116	46	211.43	17.2	0.04	+	NM_018265	Body	Gene Body	199127249	16277	C1orf106	55765	protein-coding
chr1	199174819	199175106	0#	1#[CTTCCACT:95:0.8808814310639483]	0#	289	90	32	339.3	68.82	0.02	+	NM_018265	DE	DownStream Enhancer	199127249	47660	C1orf106	55765	protein-coding
chr1	199255050	199255637	0#	1#[CTTCCTCC:28:0.9250330832242935]	0#	589	362	57	241.28	12.45	0.03	-	NM_001252100	Body	Gene Body	199259451	-4039	KIF21B	23046	protein-coding
chr1	199261360	199262064	0#	4#[CTTCCTCT:504:1.0000000000000002] [AGAGGAAG:442:1.0] [AGGGGAAG:217:0.9496545689046608] [TTTCCTCA:645:0.8667187803472263]	3#[AGGTCA:197:1.0] [TGACCC:123:0.8857896050338628] [GGGTCA:437:0.8857896050338628]	706	537	36	153.09	12.66	0.03	-	NM_001252100	UE	Upstream Enhancer	199259451	2446	KIF21B	23046	protein-coding
chr1	199262273	199262997	1#[GACTTCCTCTTTT:460:0.891331783801081]	2#[AGAGGAAA:497:0.8910059604551641] [AGTGGAAG:220:0.8808814310639483]	0#	726	463	155	1183.1	60.5	0	-	NM_001252100	UE	Upstream Enhancer	199259451	3285	KIF21B	23046	protein-coding
chr1	199355537	199355960	0#	2#[GTTCCTCT:122:0.9279064825938323] [GTTCCTCC:244:0.8529395658181256]	0#	425	243	35	116.24	12.08	0.08	-	NM_001270601	UE	Upstream Enhancer	199351123	4657	ASCL5	647219	protein-coding
chr1	199562424	199562859	1#[AAAAGAGGAACTG:204:0.914668338984124]	0#	0#	437	228	44	342.21	40.7	0.02	+	NM_000299	Body	Gene Body	199519202	43450	PKP1	5317	protein-coding
chr1	199711772	199712018	1#[CACTTCCTCTCTC:173:0.8159749523179658]	2#[AGGGGAAG:101:0.9496545689046608] [TTTCCTCA:195:0.8667187803472263]	1#[TGACCT:186:1.0]	248	151	17	112.08	14.42	0.1	-	NM_012396	UE	Upstream Enhancer	199704922	7001	PHLDA3	23612	protein-coding
chr1	199747634	199748163	1#[CACTTCCTCTTCC:164:0.8333154263803636]	1#[AGGGGAAA:293:0.8406605293598248]	1#[AGGTCA:203:1.0]	531	164	77	542.48	36.16	0	-	NM_001193571	UE	Upstream Enhancer	199742590	5208	CSRP1	1465	protein-coding
chr1	199841532	199842036	2#[GAAAGAGGAAGTG:191:0.9837820116239603] [GAAAGGGGAAGTC:334:0.8348851426326365]	0#	1#[AGGTCA:401:1.0]	506	350	27	155.87	14.95	0.03	+	NM_020443	UE	Upstream Enhancer	199884072	-42190	NAV1	89796	protein-coding
[truncated: 25,161 more rows]
